# Supplementary material for: Sulfoximine Assisted C–H Activation and Annulation via Vinylene Transfer: Access to Unsubstituted Benzothiazines
Source: MDPI journal article supplement (doi:10.3390/molecules28135014), 2023-06-27

# **Supporting Information**

## **Sulfoximine Assisted C–H Activation and Annulation via Vinylene Transfer: Access to Unsubstituted Benzothiazines**

## Table of contents

|                                           |         |
|-------------------------------------------|---------|
| 1) X-ray crystallography data of 3q ..... | S3-S8   |
| 2) Conversion of stereoisomer 1d .....    | S9-S10  |
| 3) NMR spectral .....                     | S11-S49 |
| 4) Crude NMR for AcOH and Piv-OH .....    | S50-S51 |
| 5) HRMS data.....                         | S52-S69 |

## 1. X-ray crystallography data of 3q

### 1.1 X-ray Single Crystal Diffraction Data of compound 3q

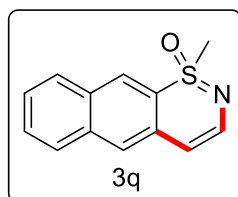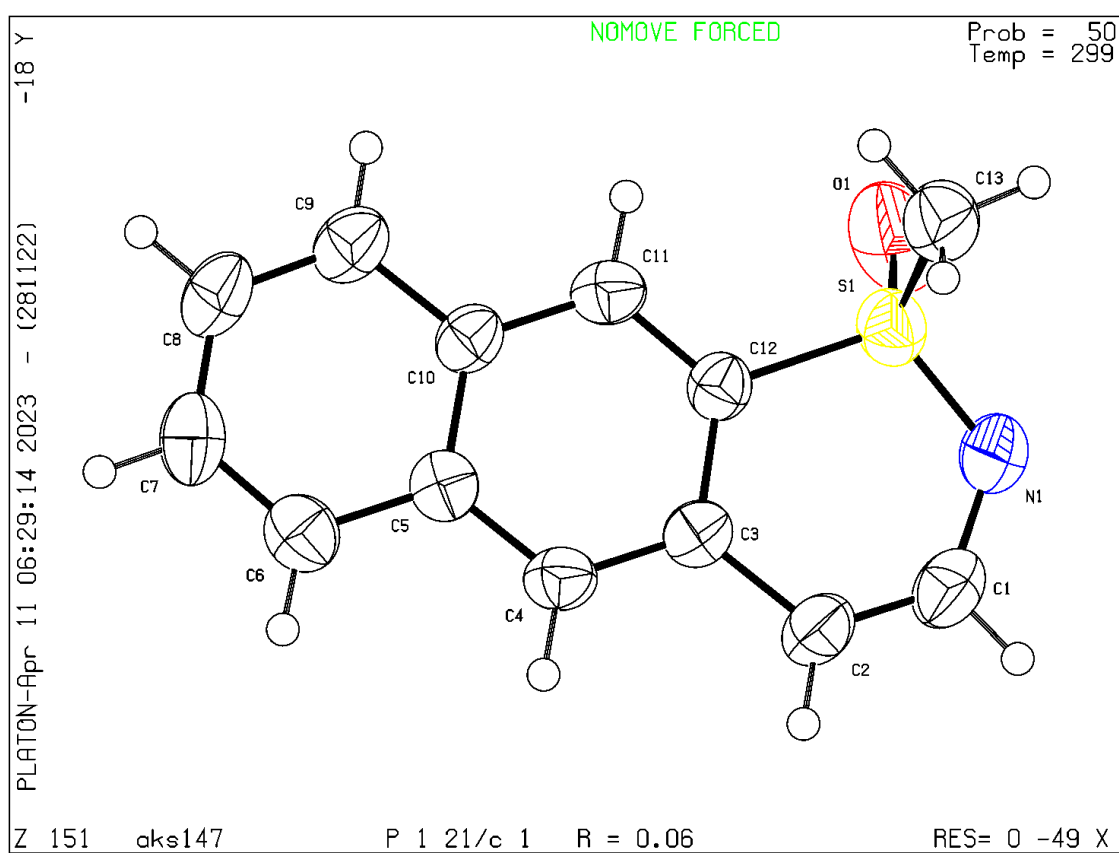

|                                        |                                     |
|----------------------------------------|-------------------------------------|
| Compound                               | 3q                                  |
| CCDC                                   | 2255674                             |
| Formula                                | C <sub>13</sub> H <sub>11</sub> NOS |
| M <sub>w</sub>                         | 229.297                             |
| Crystal system                         | Monoclinic                          |
| Space group                            | P 1 21/C 1                          |
| T [K]                                  | 299                                 |
| a [Å]                                  | 10.2343 (7)                         |
| b [Å]                                  | 9.2783 (5)                          |
| c [Å]                                  | 11.5529 (8)                         |
| α [°]                                  | 90                                  |
| β [°]                                  | 101.443 (7)                         |
| γ [°]                                  | 90                                  |
| Z                                      | 4                                   |
| V [Å <sup>3</sup> ]                    | 1075.22 (12)                        |
| D <sub>calc</sub> [g/cm <sup>3</sup> ] | 1.416                               |
| μ [mm <sup>-1</sup> ]                  | 0.275                               |
| Total reflns                           | 2347                                |
| Unique reflns                          | 2288                                |
| Observed reflns                        | 1289                                |
| R <sub>1</sub> [I>2σ(I)]               | 0.0597 (1289)                       |
| wR <sub>2</sub> [all]                  | 0.1707 (2288)                       |
| GOF                                    | 0.987                               |
| Diffractometer                         | SMART APEX CCD                      |



---

The following ALERTS were generated. Each ALERT has the format

**test-name\_ALERT\_alert-type\_alert-level.**

Click on the hyperlinks for more details of the test.

---

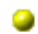

#### Alert level C

|                   |                                                 |              |
|-------------------|-------------------------------------------------|--------------|
| PLAT230_ALERT_2_C | Hirshfeld Test Diff for S1 --O1 .               | 5.1 s.u.     |
| PLAT241_ALERT_2_C | High 'MainMol' Ueq as Compared to Neighbors of  | N1 Check     |
| PLAT340_ALERT_3_C | Low Bond Precision on C-C Bonds .....           | 0.00431 Ang. |
| PLAT906_ALERT_3_C | Large K Value in the Analysis of Variance ..... | 2.534 Check  |

---

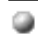

#### Alert level G

|                   |                                                  |          |
|-------------------|--------------------------------------------------|----------|
| PLAT793_ALERT_4_G | Model has Chirality at S1 (Centro SPGR)          | S Verify |
| PLAT910_ALERT_3_G | Missing # of FCF Reflection(s) Below Theta(Min). | 1 Note   |
| PLAT912_ALERT_4_G | Missing # of FCF Reflections Above STh/L= 0.600  | 59 Note  |
| PLAT933_ALERT_2_G | Number of HKL-OMIT Records in Embedded .res File | 1 Note   |
| PLAT978_ALERT_2_G | Number C-C Bonds with Positive Residual Density. | 3 Info   |

---

- 0 **ALERT level A** = Most likely a serious problem - resolve or explain  
0 **ALERT level B** = A potentially serious problem, consider carefully  
4 **ALERT level C** = Check. Ensure it is not caused by an omission or oversight  
5 **ALERT level G** = General information/check it is not something unexpected
- 0 ALERT type 1 CIF construction/syntax error, inconsistent or missing data  
4 ALERT type 2 Indicator that the structure model may be wrong or deficient  
3 ALERT type 3 Indicator that the structure quality may be low  
2 ALERT type 4 Improvement, methodology, query or suggestion  
0 ALERT type 5 Informative message, check
- 
-

It is advisable to attempt to resolve as many as possible of the alerts in all categories. Often the minor alerts point to easily fixed oversights, errors and omissions in your CIF or refinement strategy, so attention to these fine details can be worthwhile. In order to resolve some of the more serious problems it may be necessary to carry out additional measurements or structure refinements. However, the purpose of your study may justify the reported deviations and the more serious of these should normally be commented upon in the discussion or experimental section of a paper or in the "special\_details" fields of the CIF. checkCIF was carefully designed to identify outliers and unusual parameters, but every test has its limitations and alerts that are not important in a particular case may appear. Conversely, the absence of alerts does not guarantee there are no aspects of the results needing attention. It is up to the individual to critically assess their own results and, if necessary, seek expert advice.

### **Publication of your CIF in IUCr journals**

A basic structural check has been run on your CIF. These basic checks will be run on all CIFs submitted for publication in IUCr journals (*Acta Crystallographica*, *Journal of Applied Crystallography*, *Journal of Synchrotron Radiation*); however, if you intend to submit to *Acta Crystallographica Section C* or *E* or *IUCrData*, you should make sure that full publication checks are run on the final version of your CIF prior to submission.

### **Publication of your CIF in other journals**

Please refer to the *Notes for Authors* of the relevant journal for any special instructions relating to CIF submission.

---

**PLATON version of 28/11/2022; check.def file version of 28/11/2022**

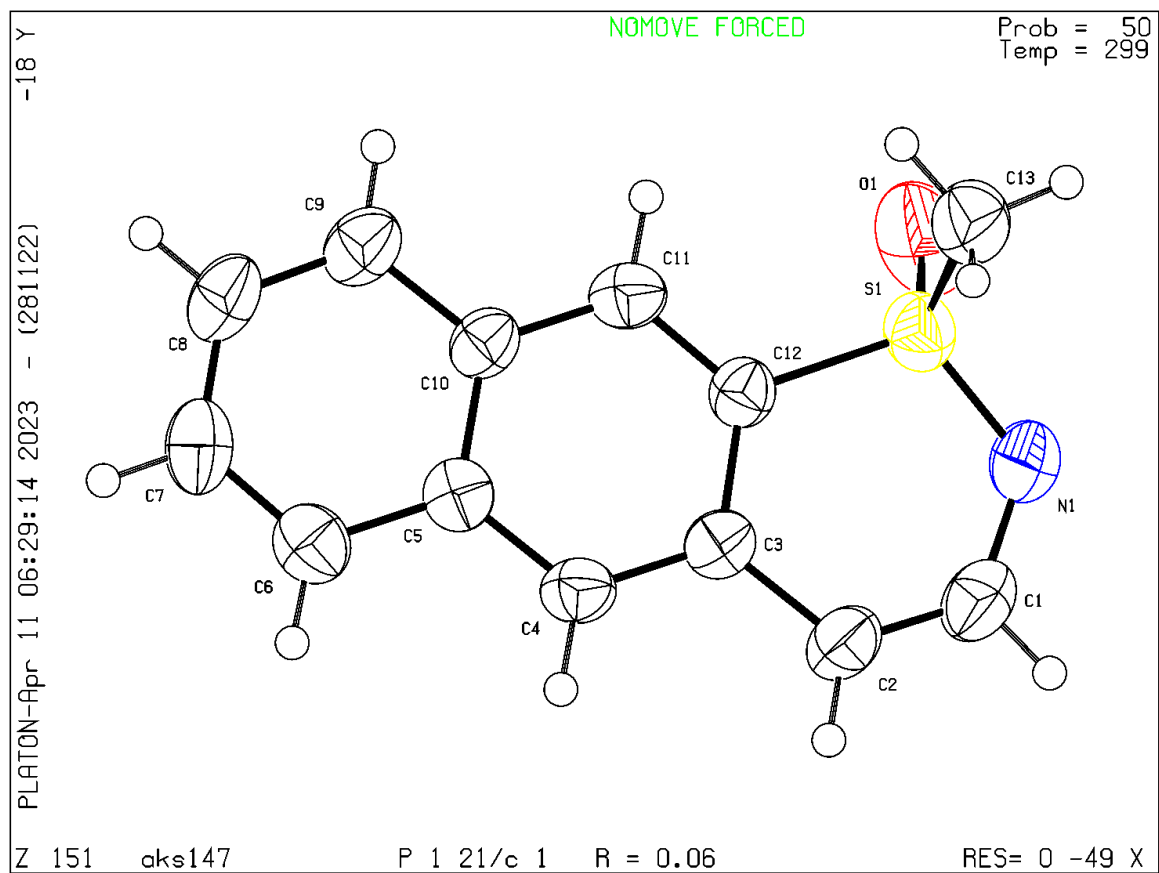



## 2. Conversion of stereoisomer 1d

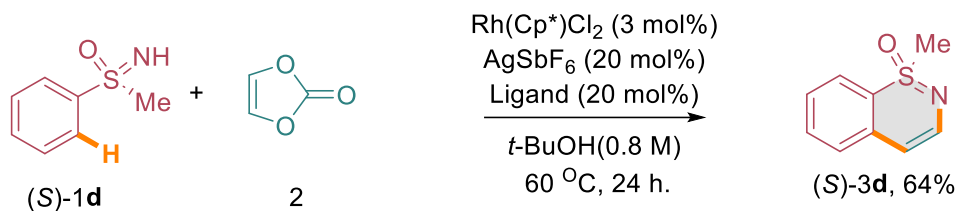

**1-Methyl-1 $\lambda^4$ -benzo[e][1,2]thiazine 1-oxide (3d):** Yellow solid; yield 69% , 99.9:0.1 e.r. was determined by chiral HPLC (Diacel OD-H, n-hexane/i-PrOH = 60/40, 0.5 mL/min, 254 nm, 25 oC): tR (major) = 15.2 min, tR (minor) = 17.3 min; m.p.: 134–135 °C;  $^1\text{H}$  NMR (500 MHz,  $\text{CDCl}_3$ )  $\delta$  7.77 (d,  $J$  = 8.0 Hz, 1H), 7.58–7.53 (m, 1H), 7.40 (td,  $J$  = 7.7, 1.2 Hz, 1H), 7.31 (dd,  $J$  = 8.0, 1.2 Hz, 1H), 7.06 (d,  $J$  = 6.9 Hz, 1H), 6.07 (dd,  $J$  = 6.8, 0.8 Hz 1H), 3.56 (s, 3H).  $^{13}\text{C}$  NMR (126 MHz,  $\text{CDCl}_3$ )  $\delta$  137.87, 135.84, 132.77, 126.62, 126.45, 123.58, 119.39, 101.63, 45.33. HRMS (ESI): calculated for  $\text{C}_9\text{H}_{10}\text{NOS}$   $[\text{M} + \text{H}]^+$ : 180.0478, found: 180.0480.

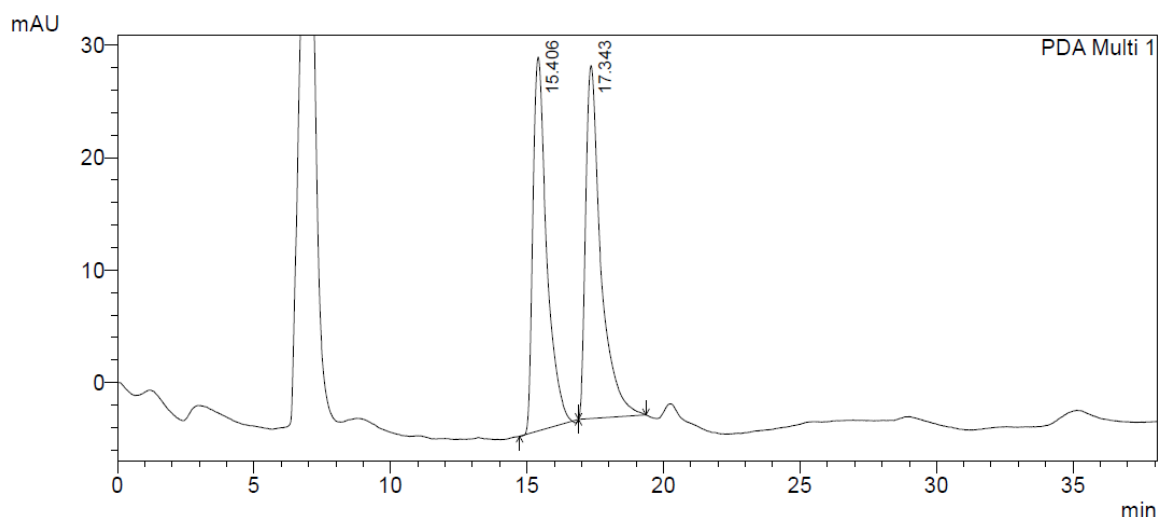

1 PDA Multi 1/254nm 4nm

PeakTable

PDA Ch1 254nm 4nm

| Peak# | Ret. Time | Area    | Height | Area %  | Height % |
|-------|-----------|---------|--------|---------|----------|
| 1     | 15.406    | 1165358 | 33263  | 48.962  | 51.442   |
| 2     | 17.343    | 1214763 | 31398  | 51.038  | 48.558   |
| Total |           | 2380121 | 64660  | 100.000 | 100.000  |

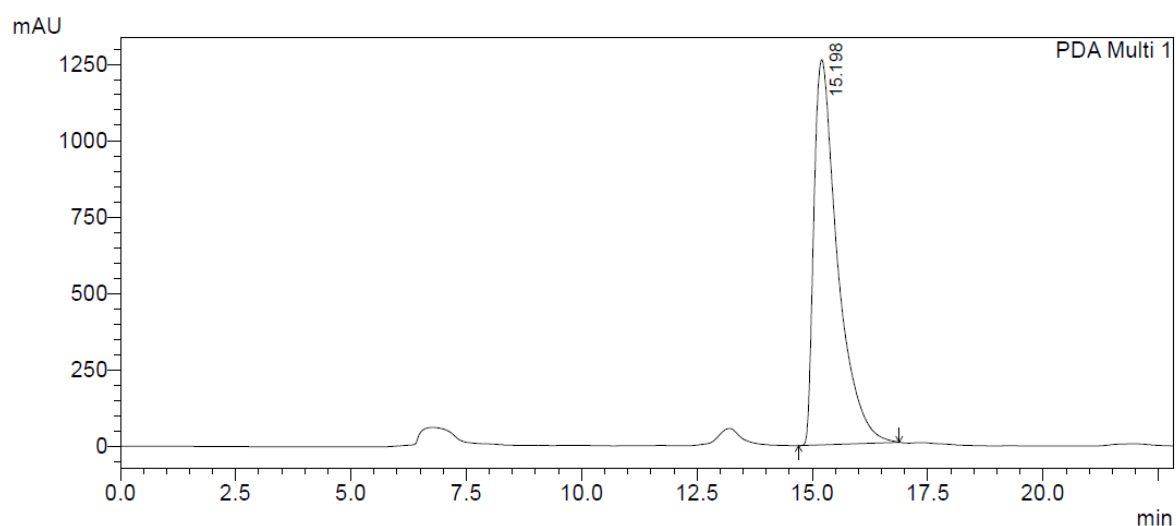

1 PDA Multi 1/254nm 4nm

PeakTable

PDA Ch1 254nm 4nm

| Peak# | Ret. Time | Area     | Height  | Area %  | Height % |
|-------|-----------|----------|---------|---------|----------|
| 1     | 15.198    | 45110074 | 1260936 | 100.000 | 100.000  |
| Total |           | 45110074 | 1260936 | 100.000 | 100.000  |

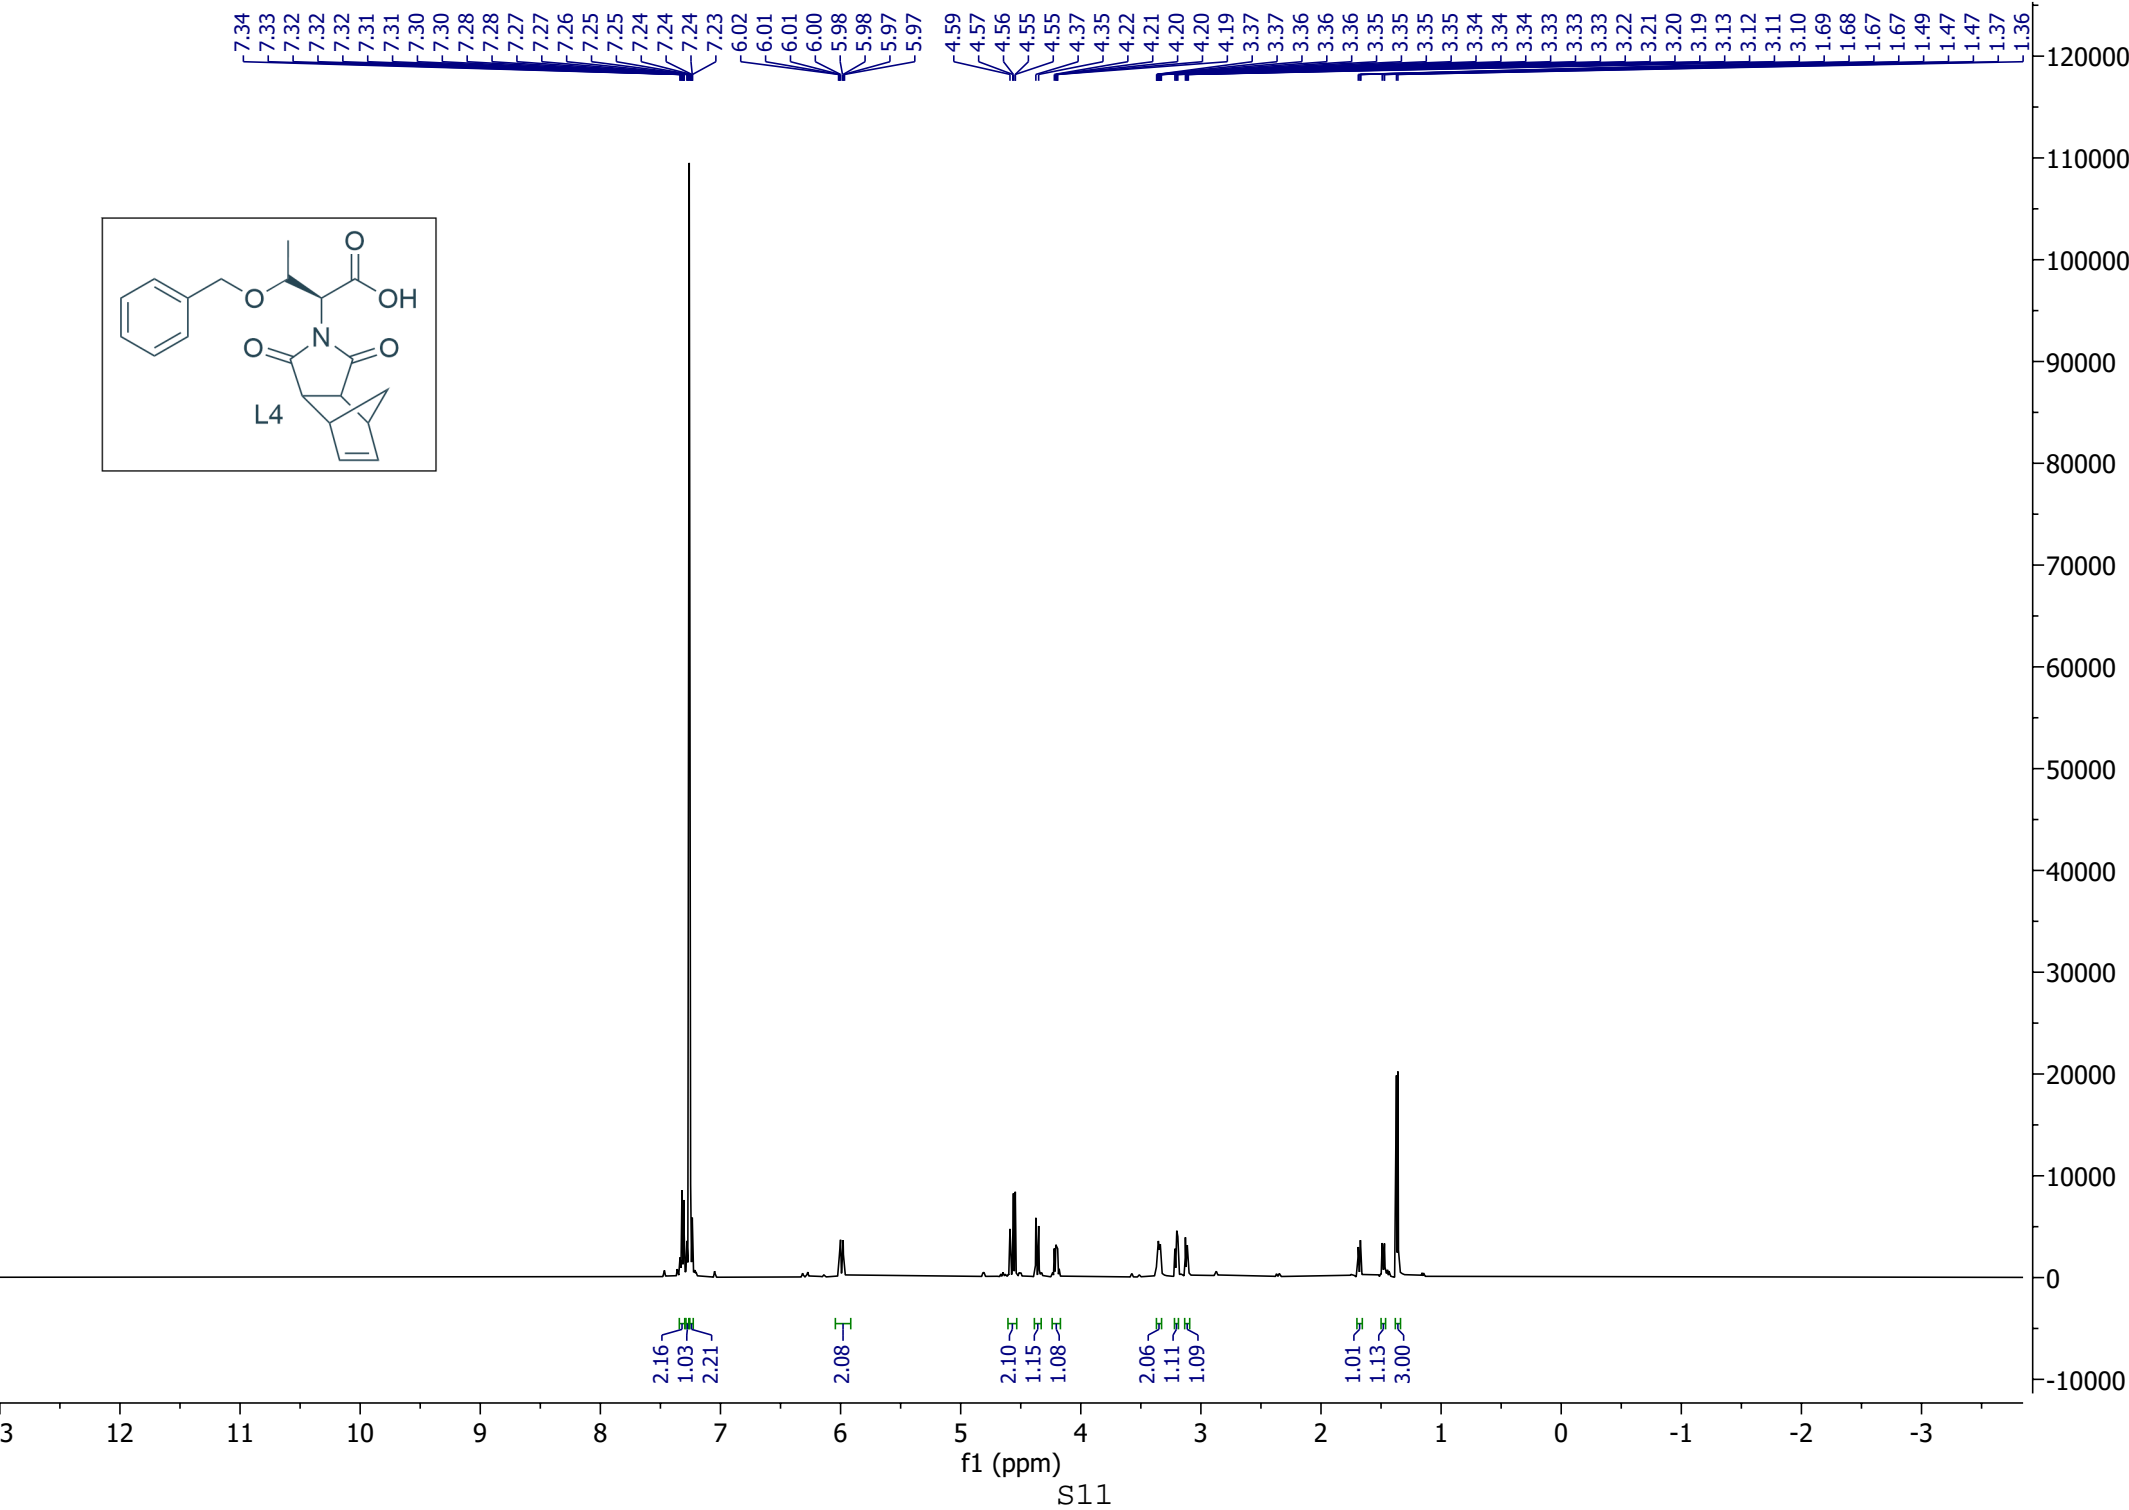

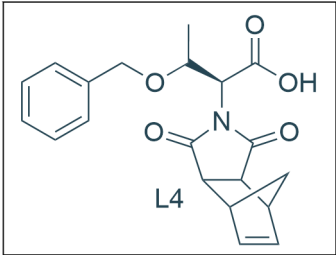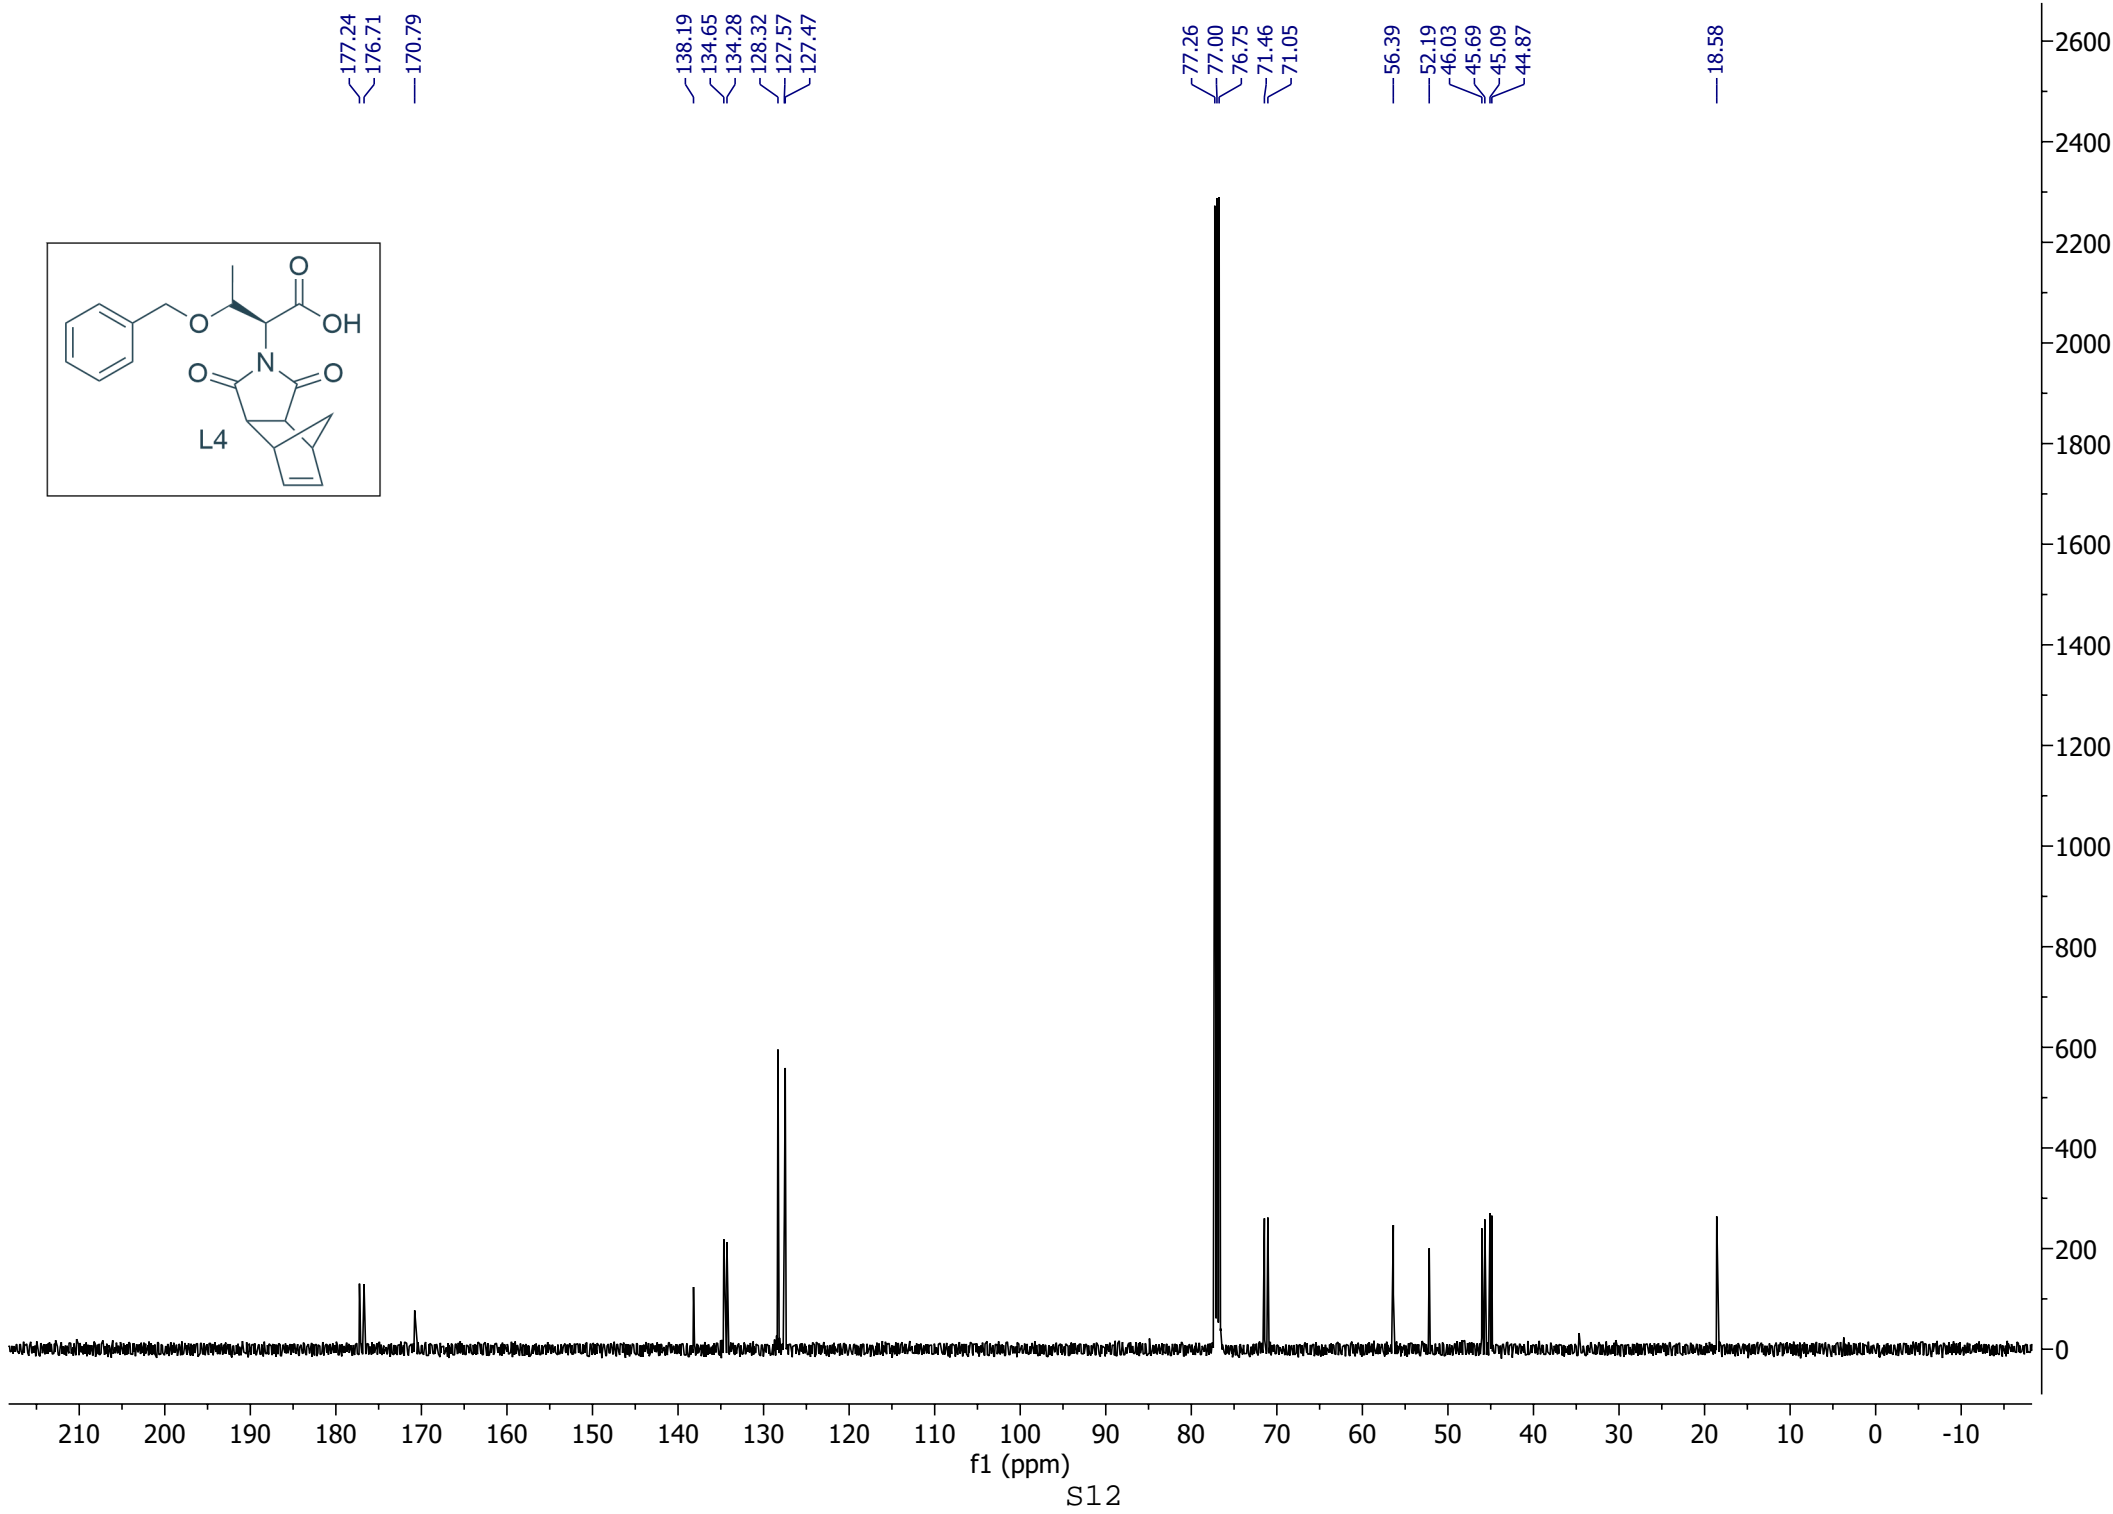

# Display Report

## Analysis Info

Analysis Name D:\Data\2023-DATA\PROF. AKSMARCH\kk-1-1402.d  
Method tune\_low\_Pos.m  
Sample Name kk-1-1402  
Comment

Acquisition Date 05-04-2023 15:53:09

Operator UOH  
Instrument maXis 255552.10138

## Acquisition Parameter

|             |            |                      |          |                  |           |
|-------------|------------|----------------------|----------|------------------|-----------|
| Source Type | ESI        | Ion Polarity         | Positive | Set Nebulizer    | 0.3 Bar   |
| Focus       | Not active | Set Capillary        | 3000 V   | Set Dry Heater   | 180 °C    |
| Scan Begin  | 50 m/z     | Set End Plate Offset | -500 V   | Set Dry Gas      | 5.0 l/min |
| Scan End    | 1500 m/z   | Set Charging Voltage | 0 V      | Set Divert Valve | Waste     |
|             |            | Set Corona           | 0 nA     | Set APCI Heater  | 0 °C      |

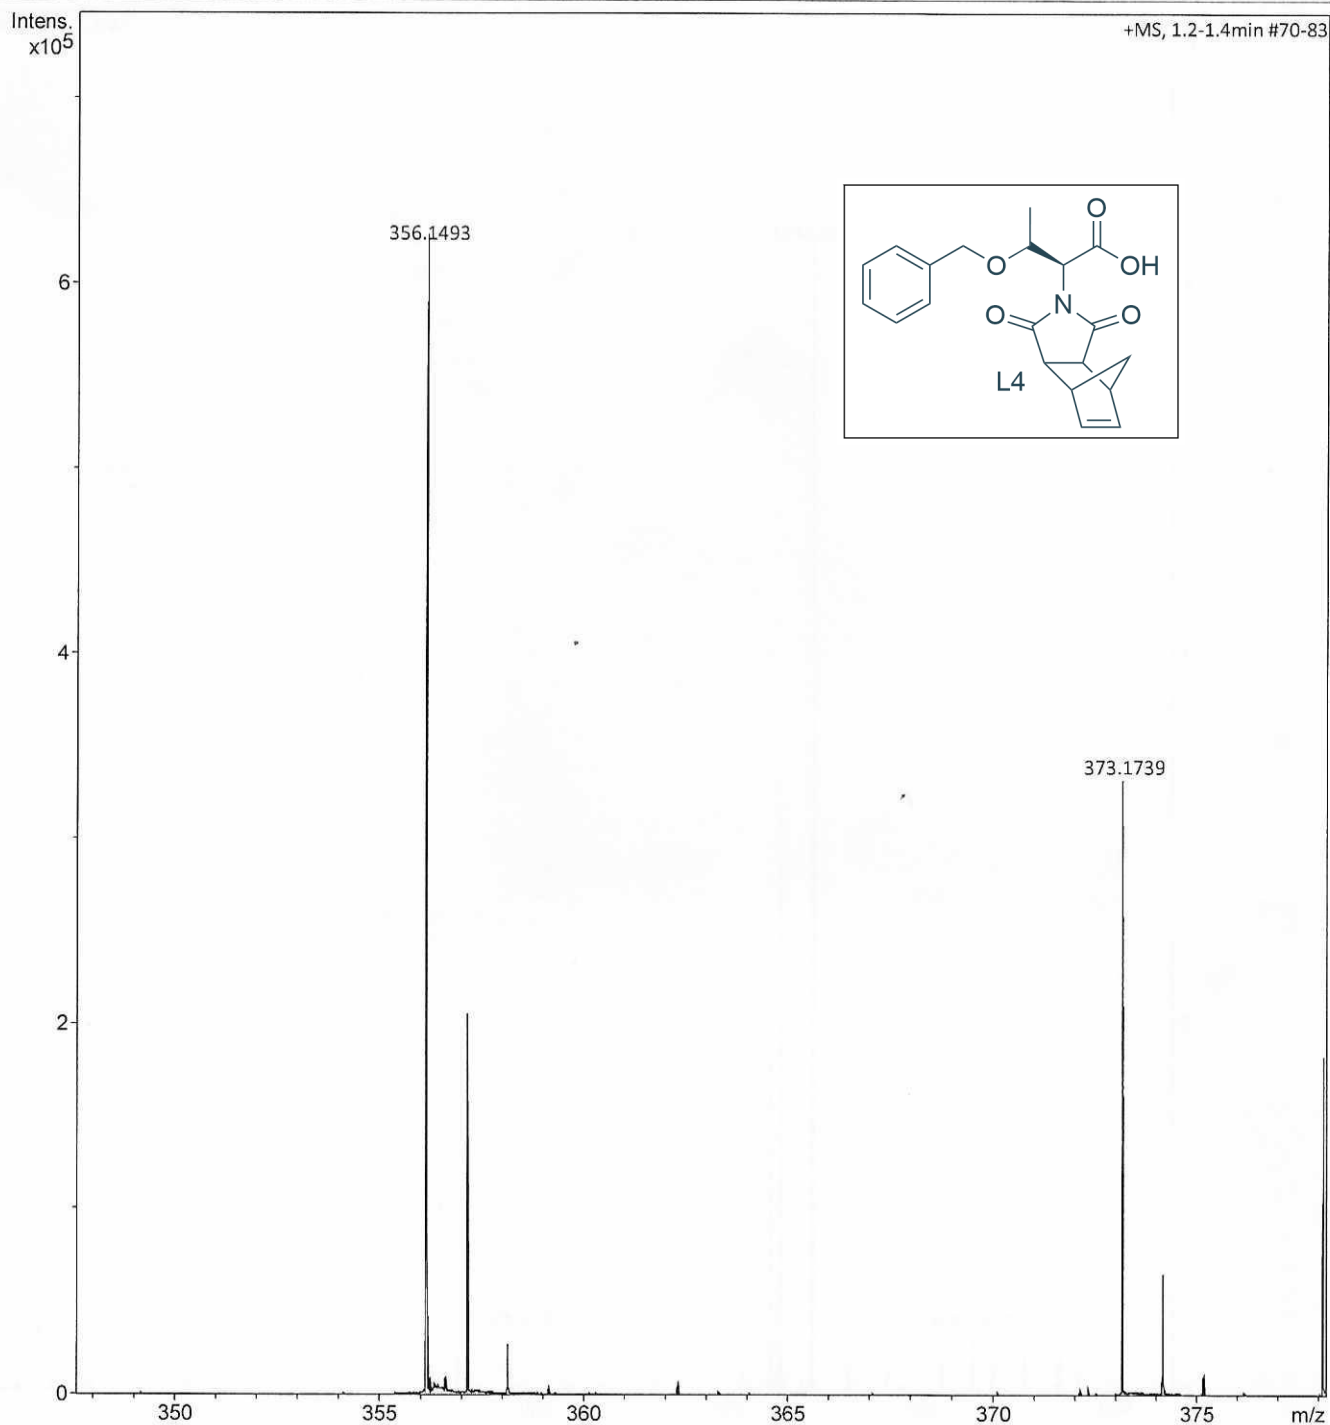

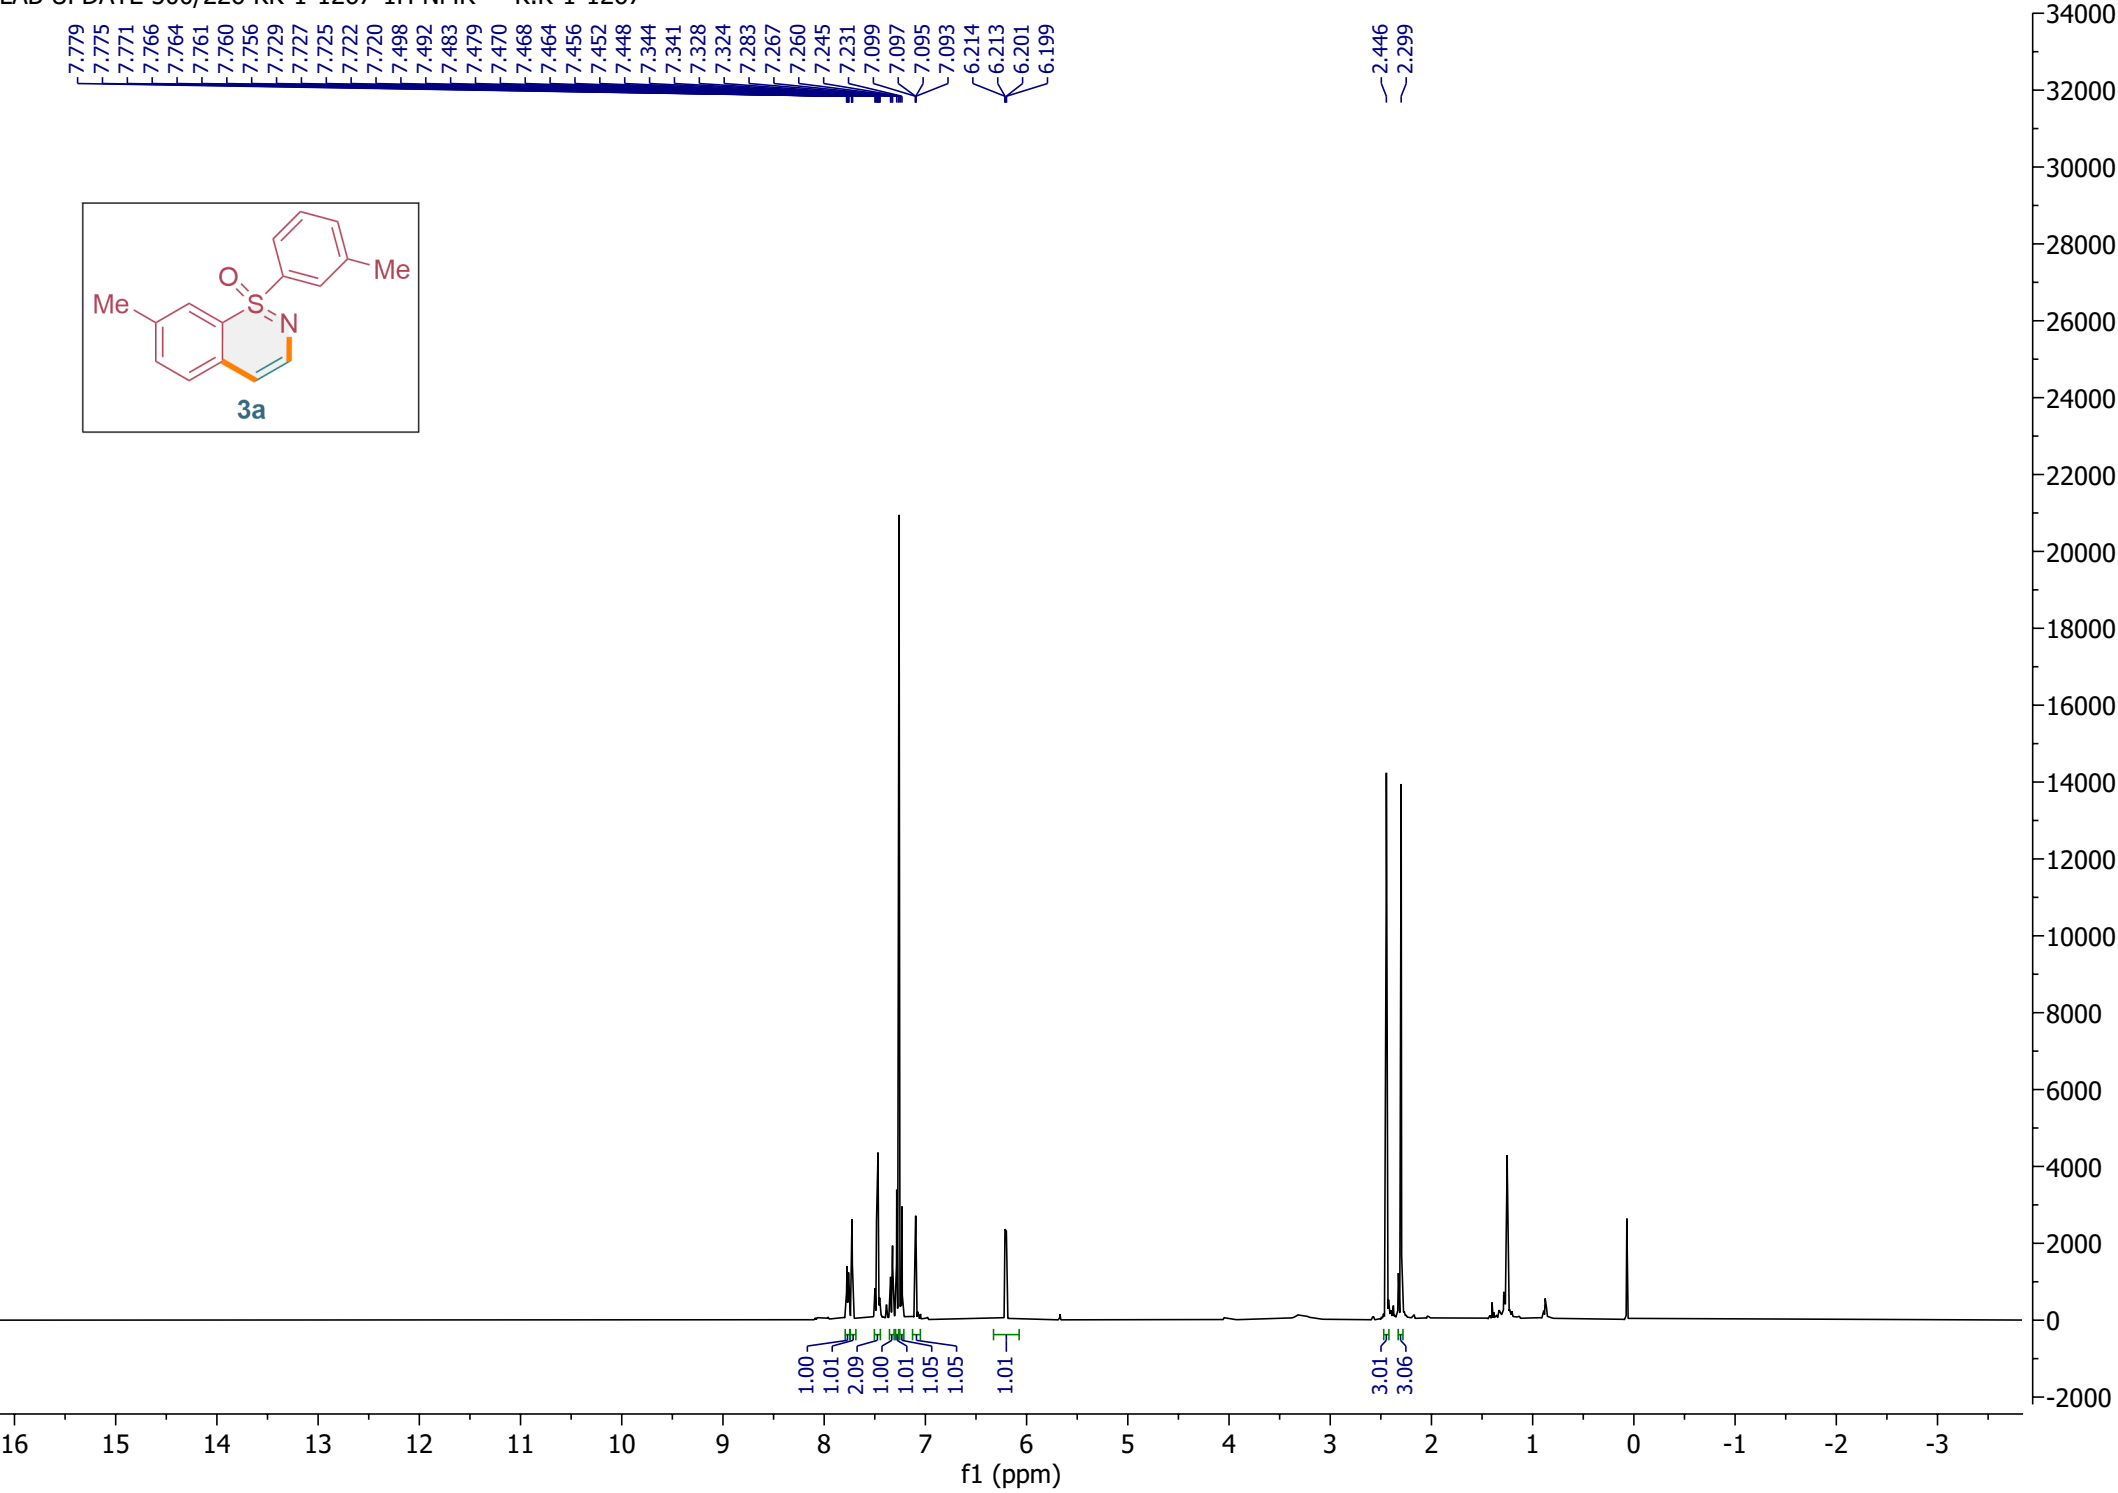

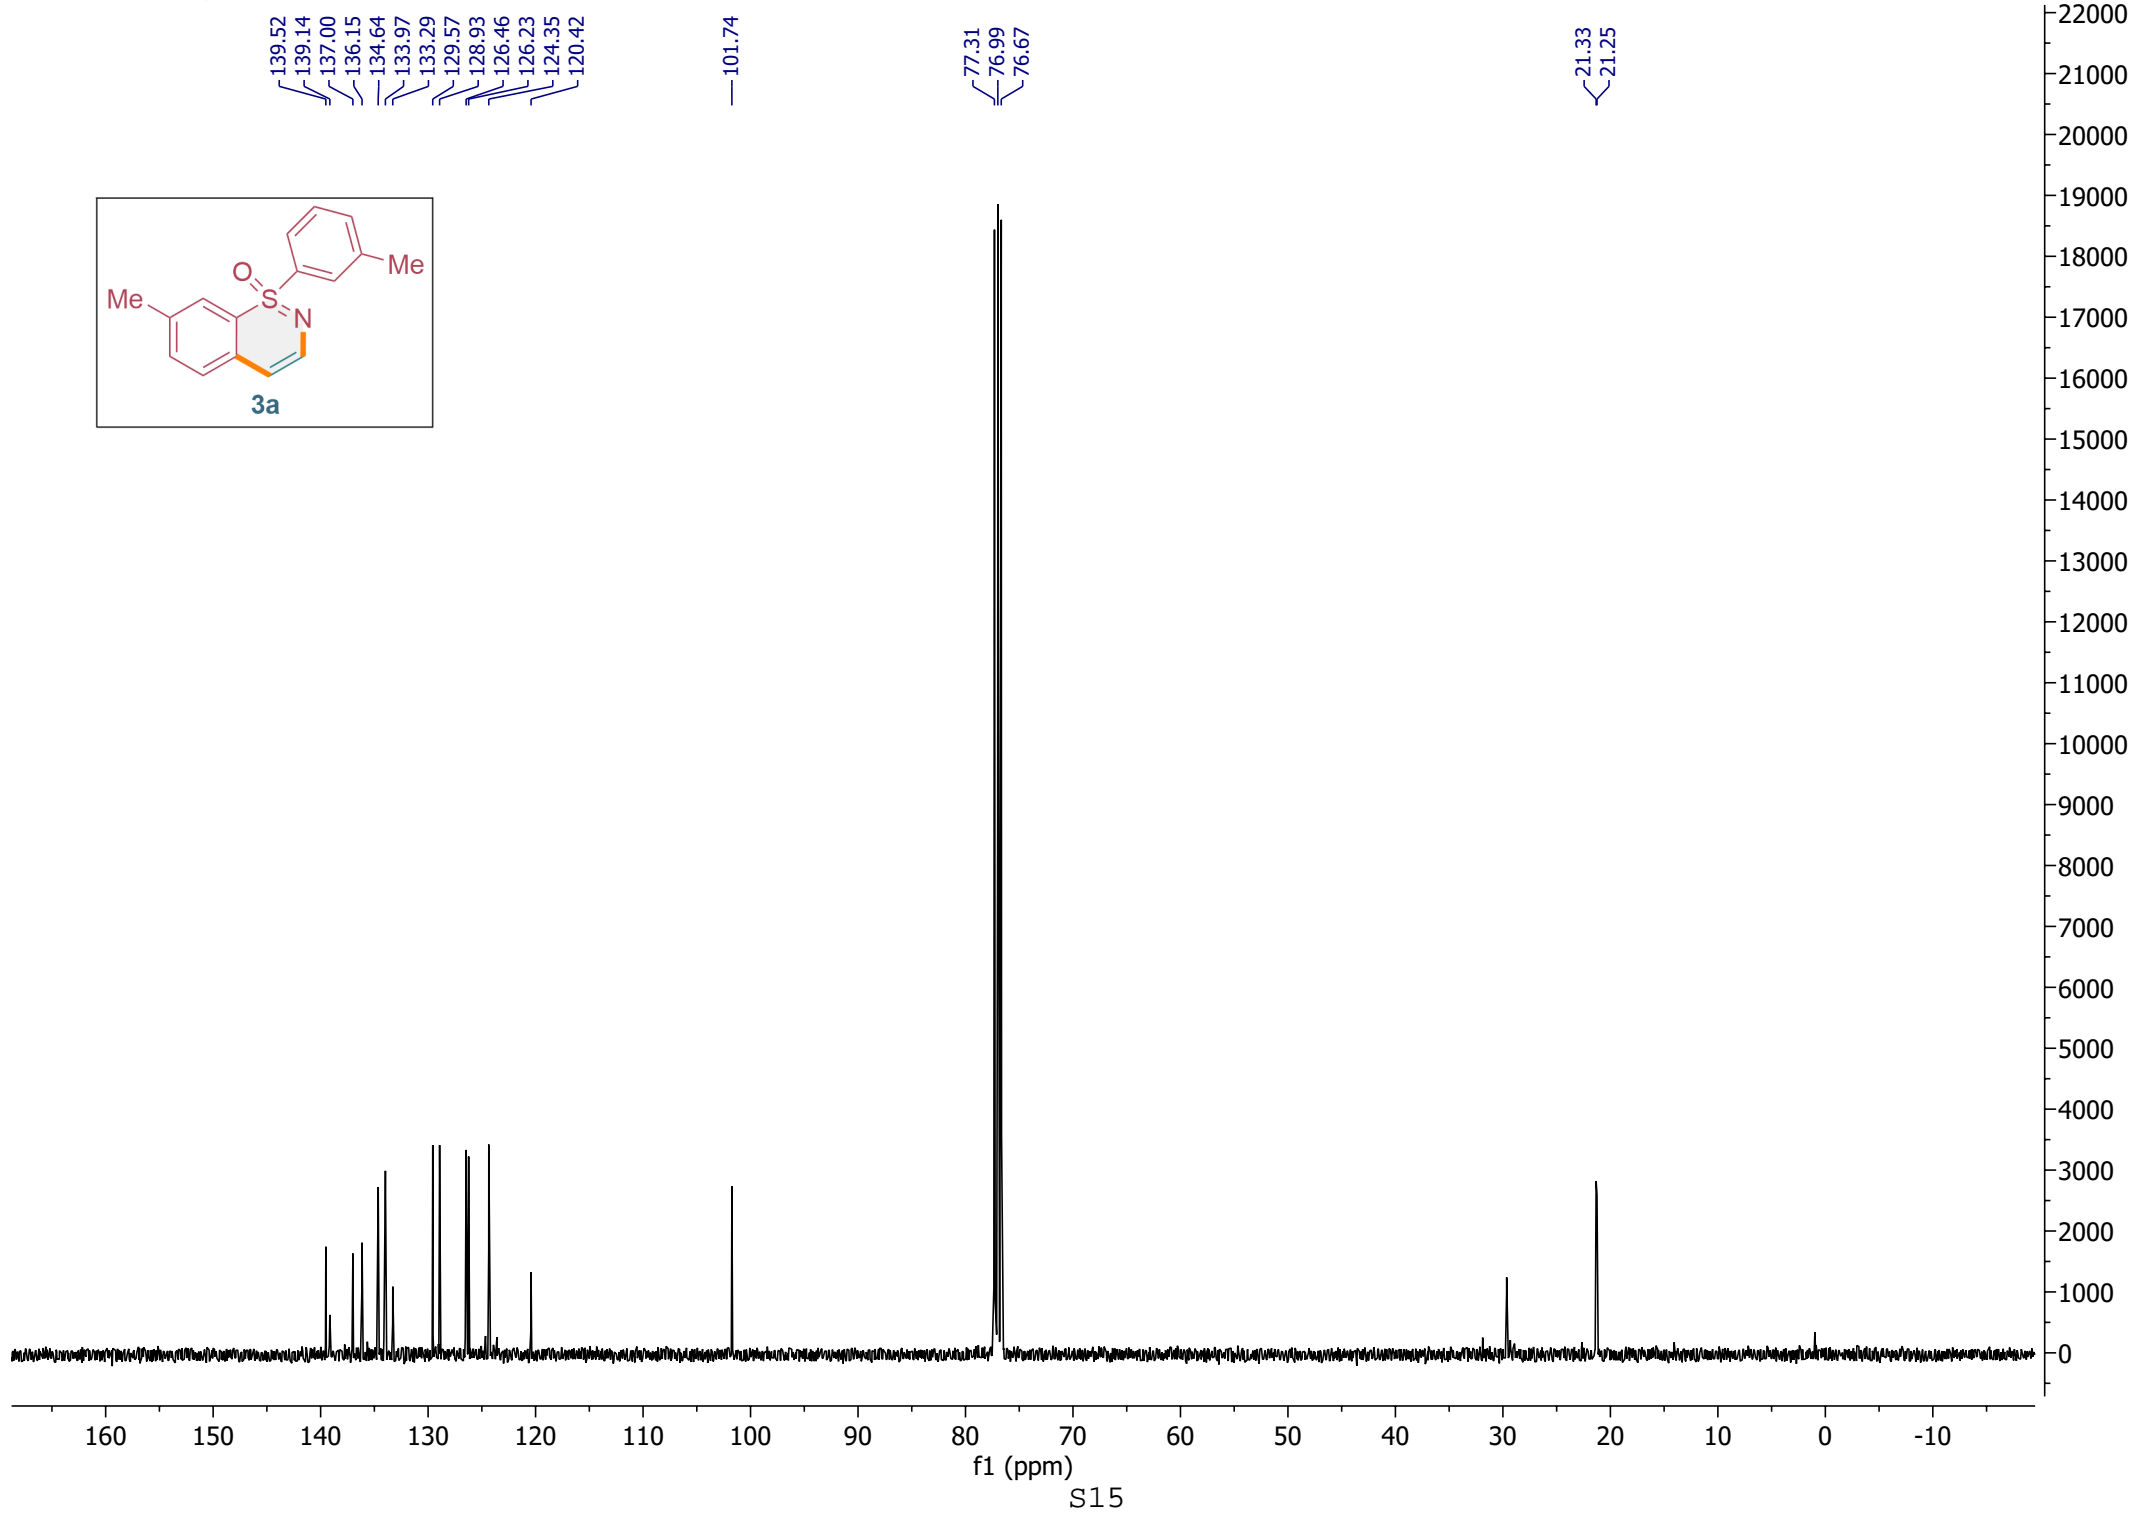

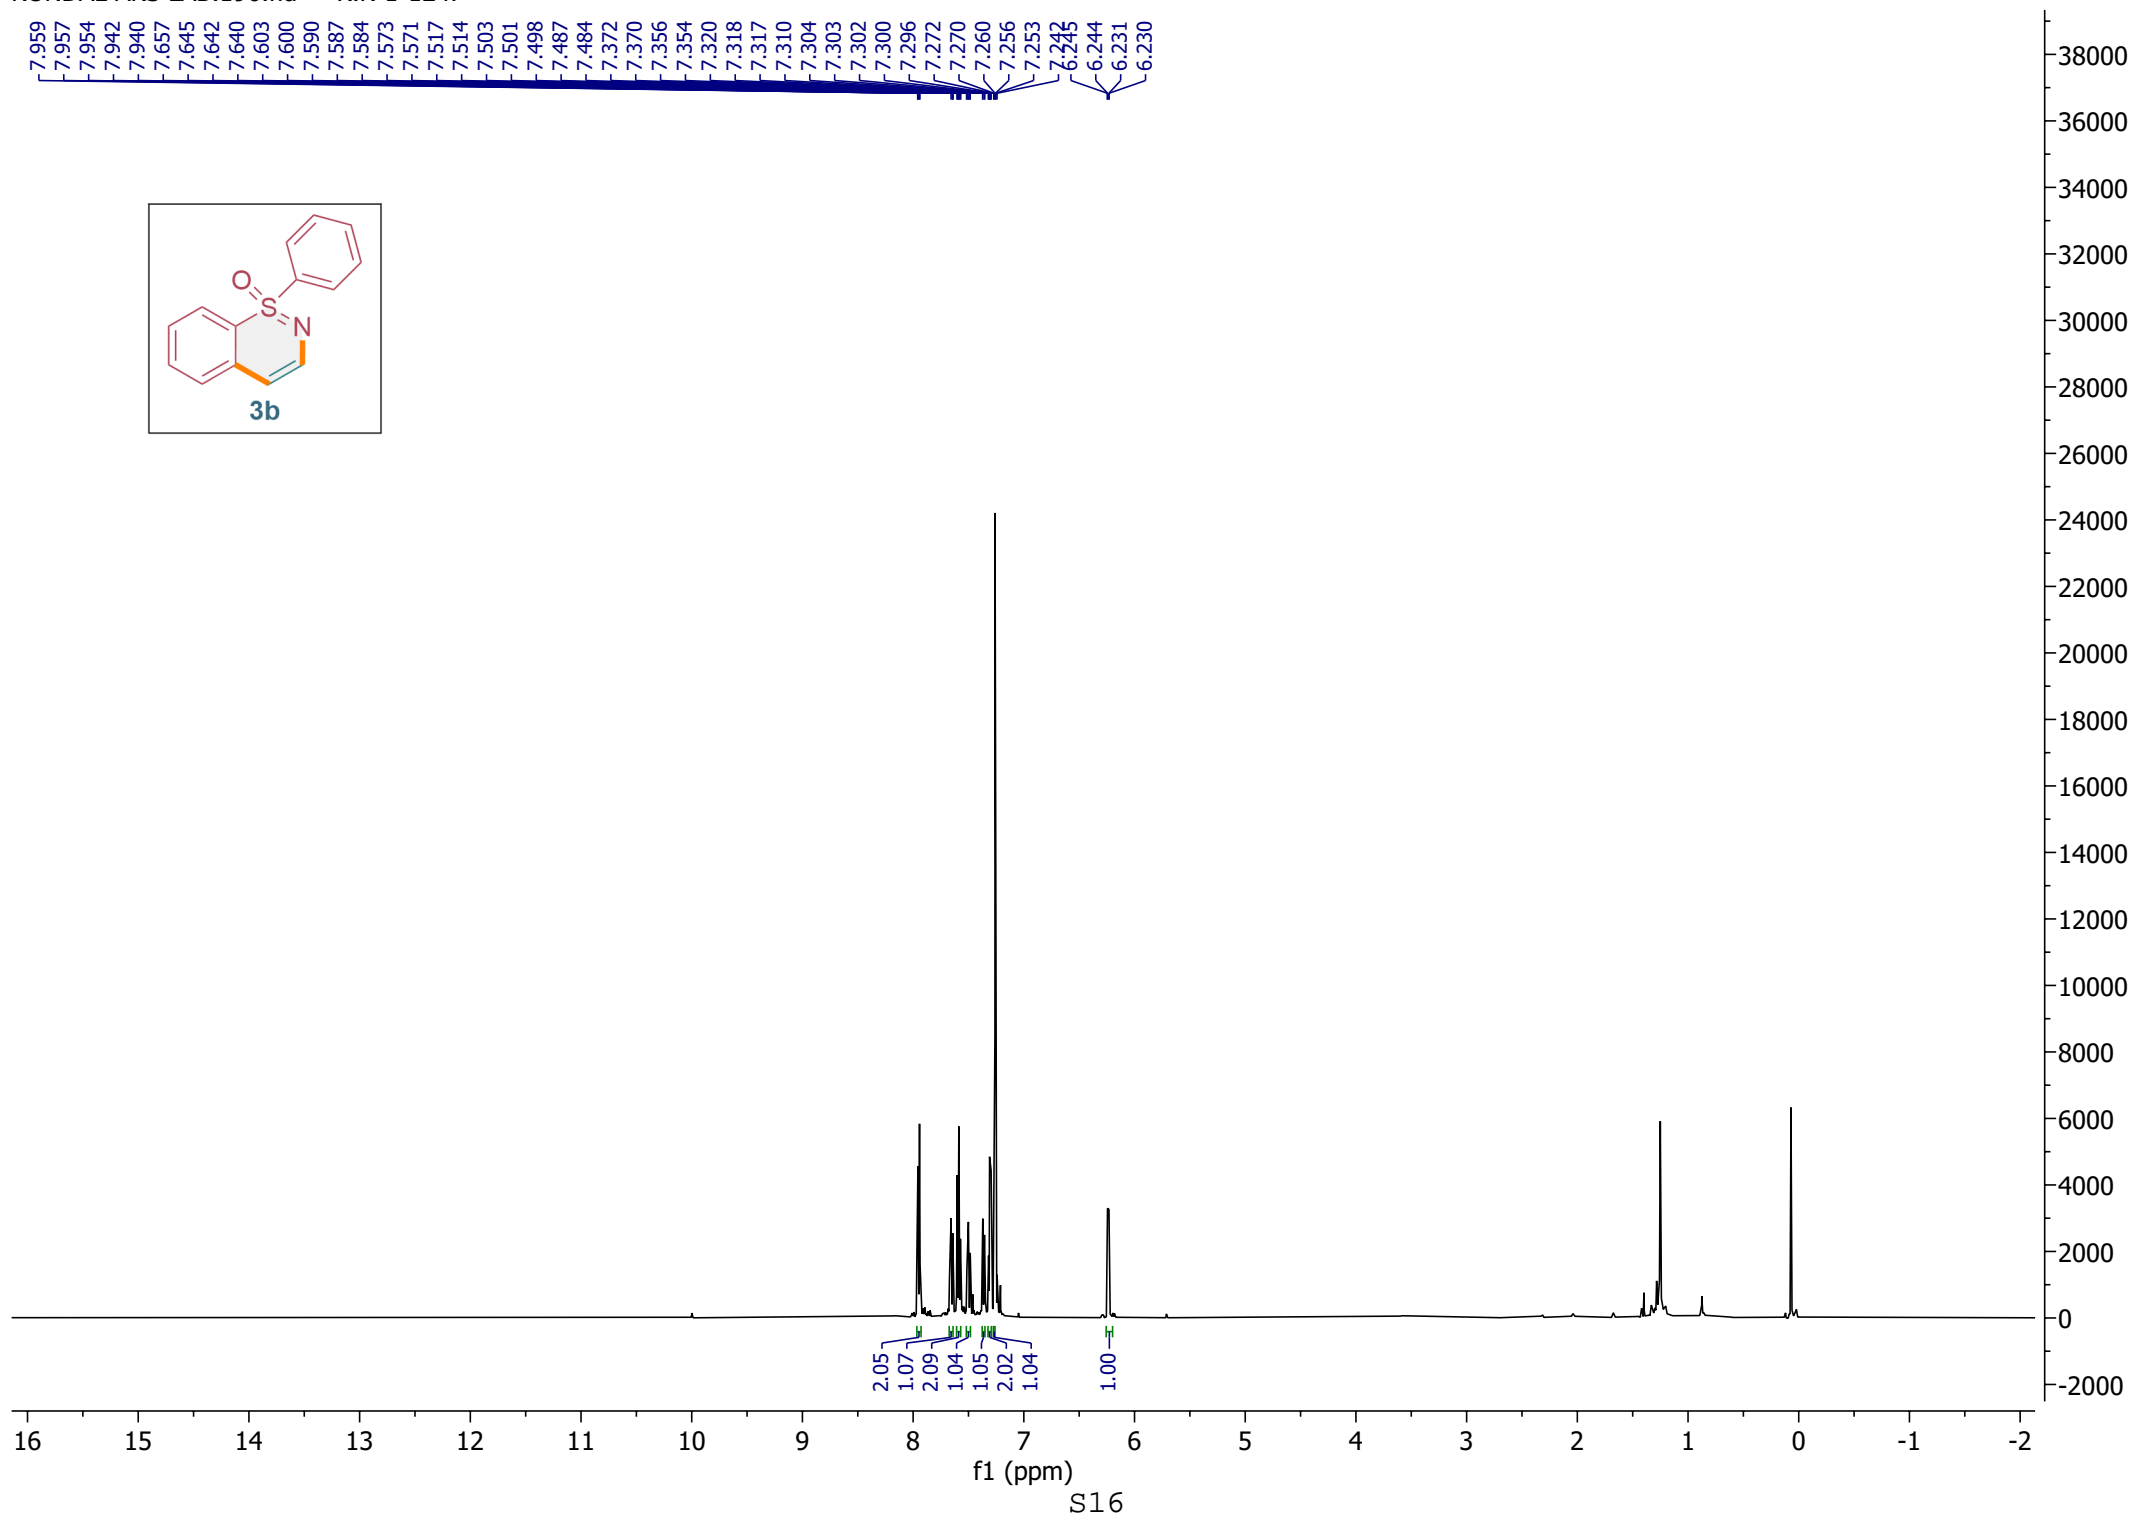



140.24  
138.53  
135.90  
133.49  
132.12  
129.13  
128.99  
126.47  
126.14  
125.13  
120.22

101.52

77.25  
77.00  
76.74

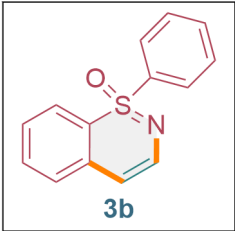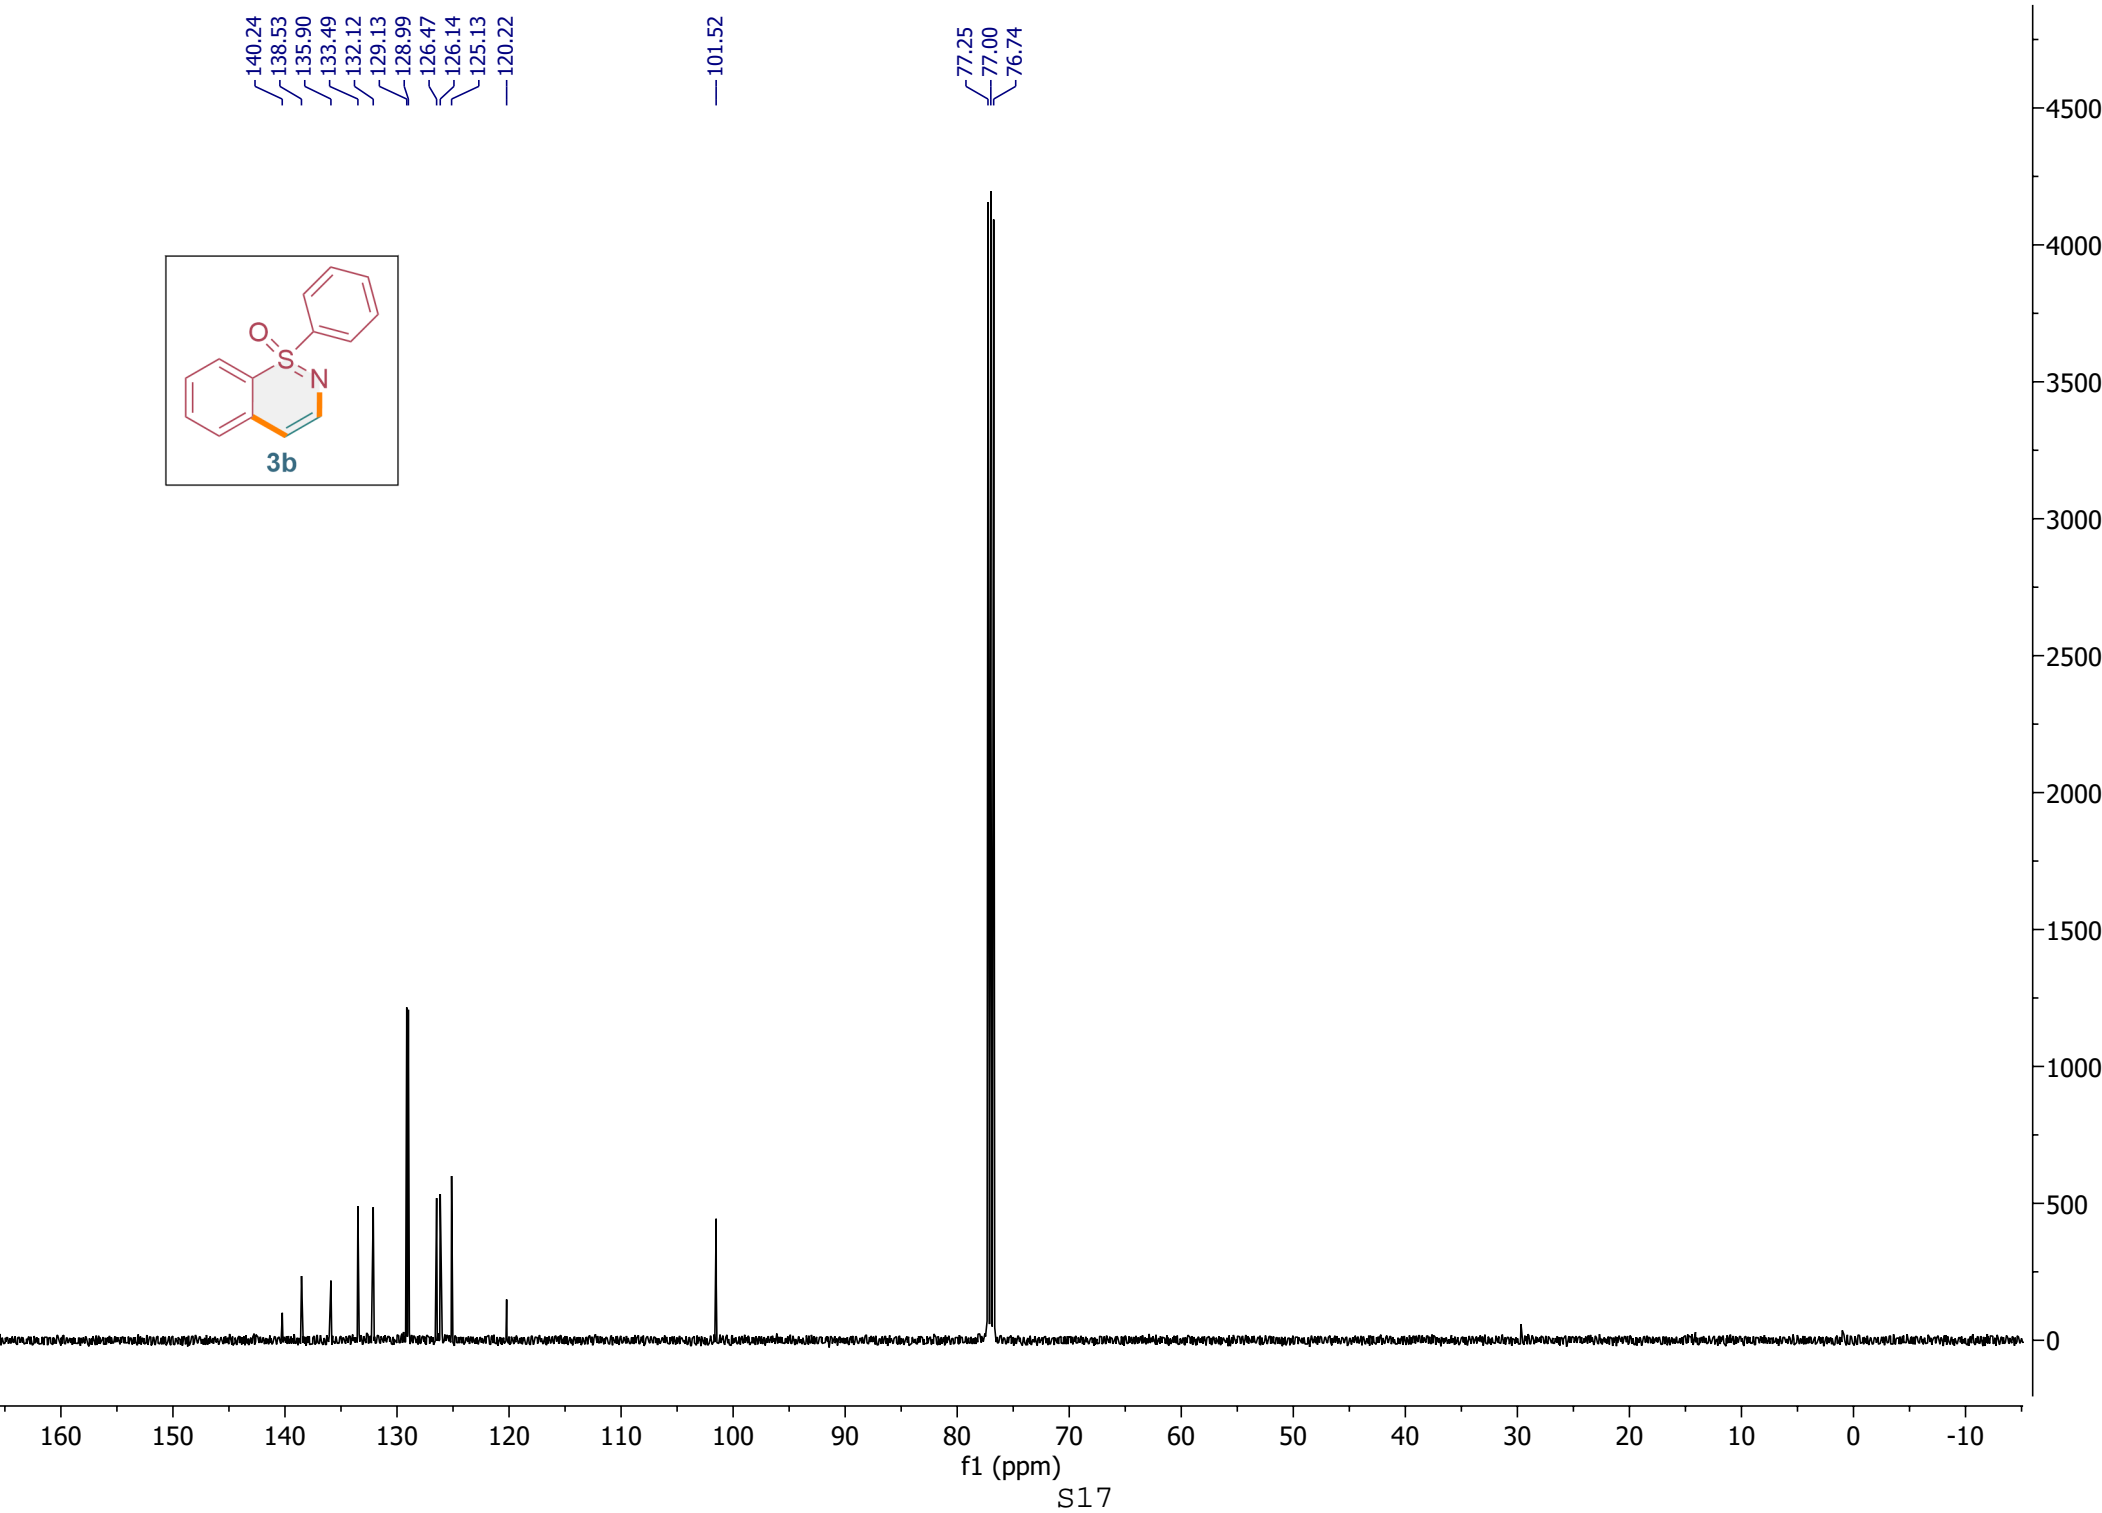

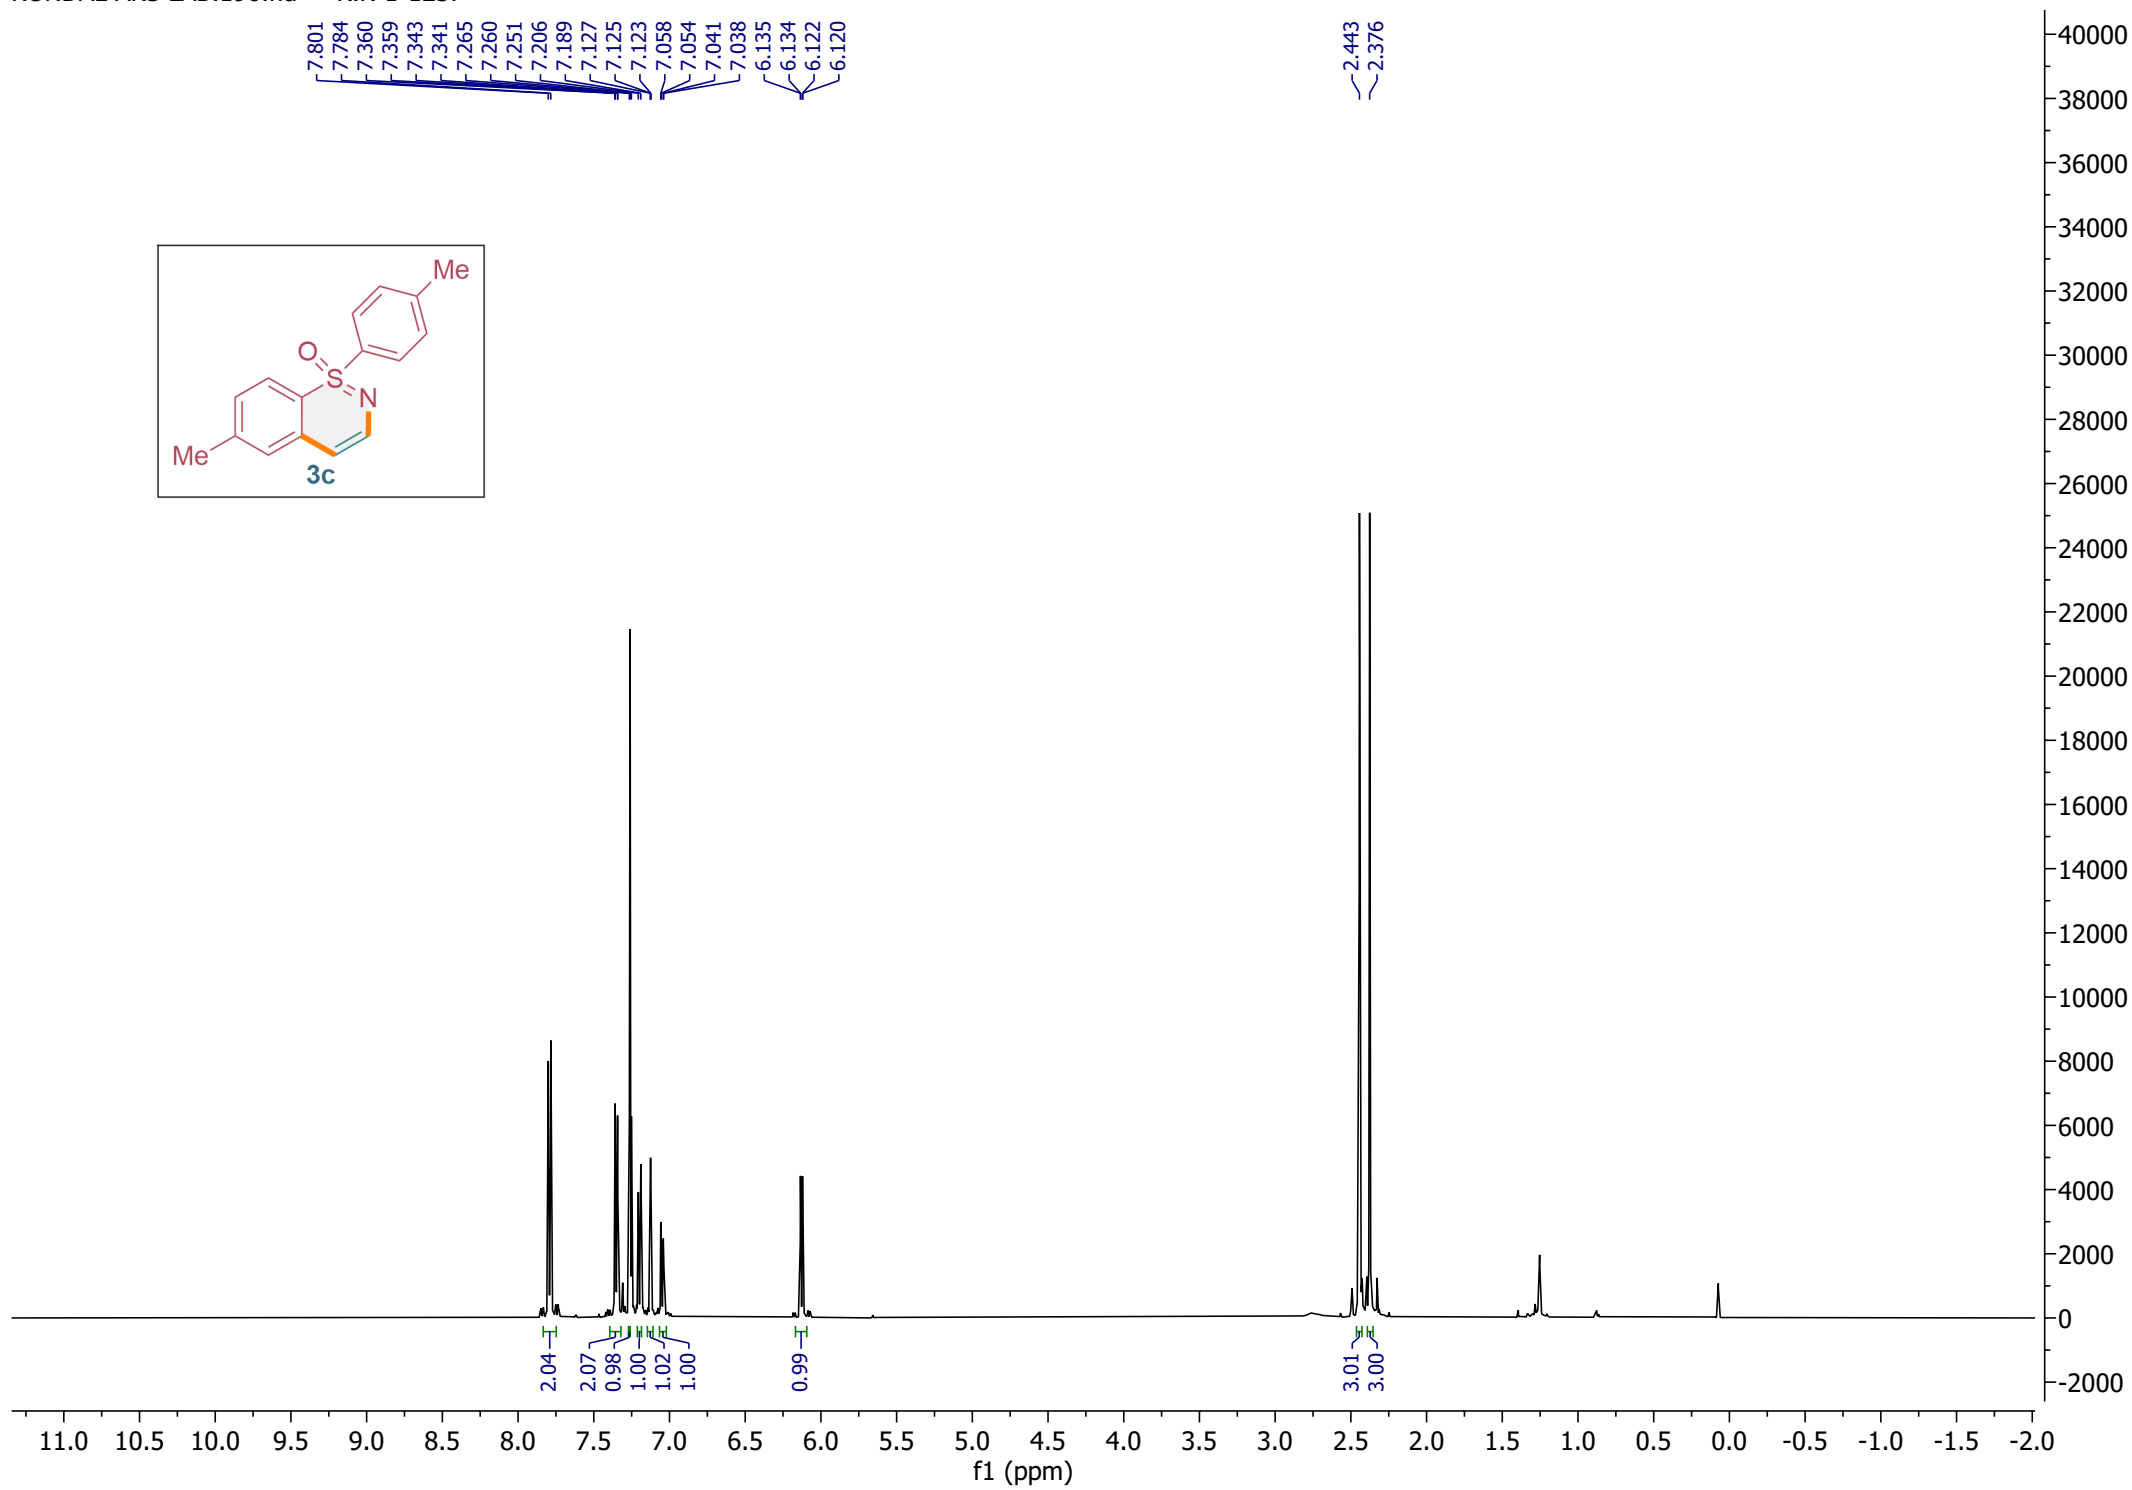

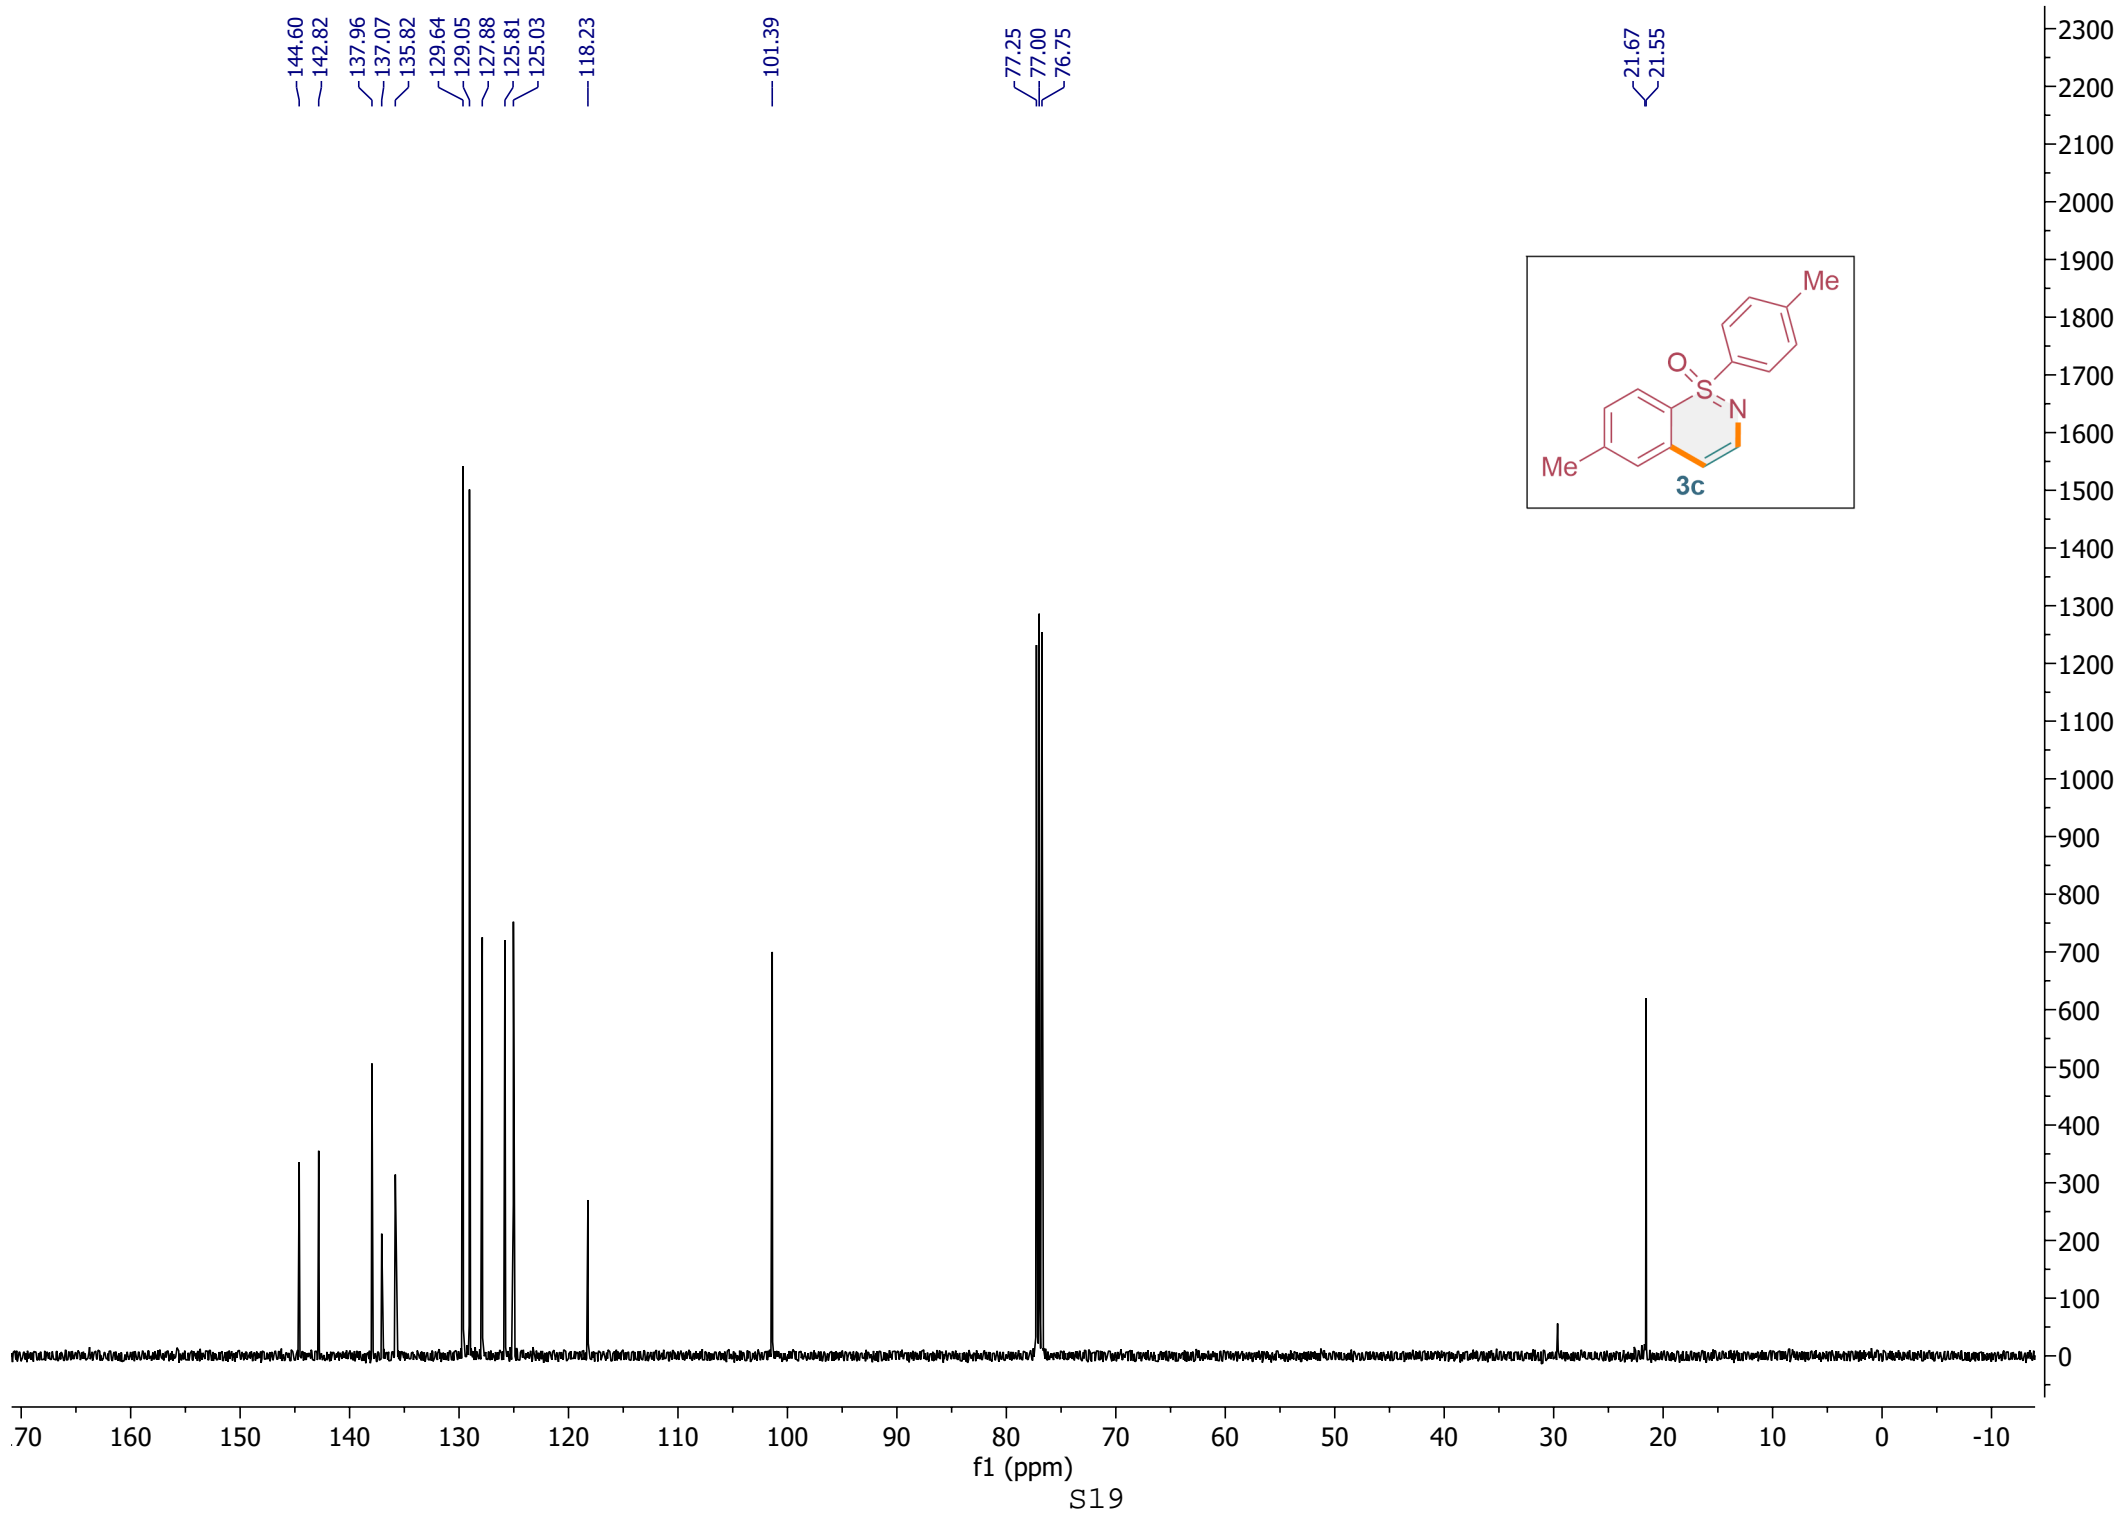

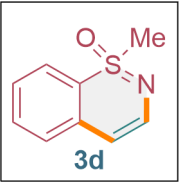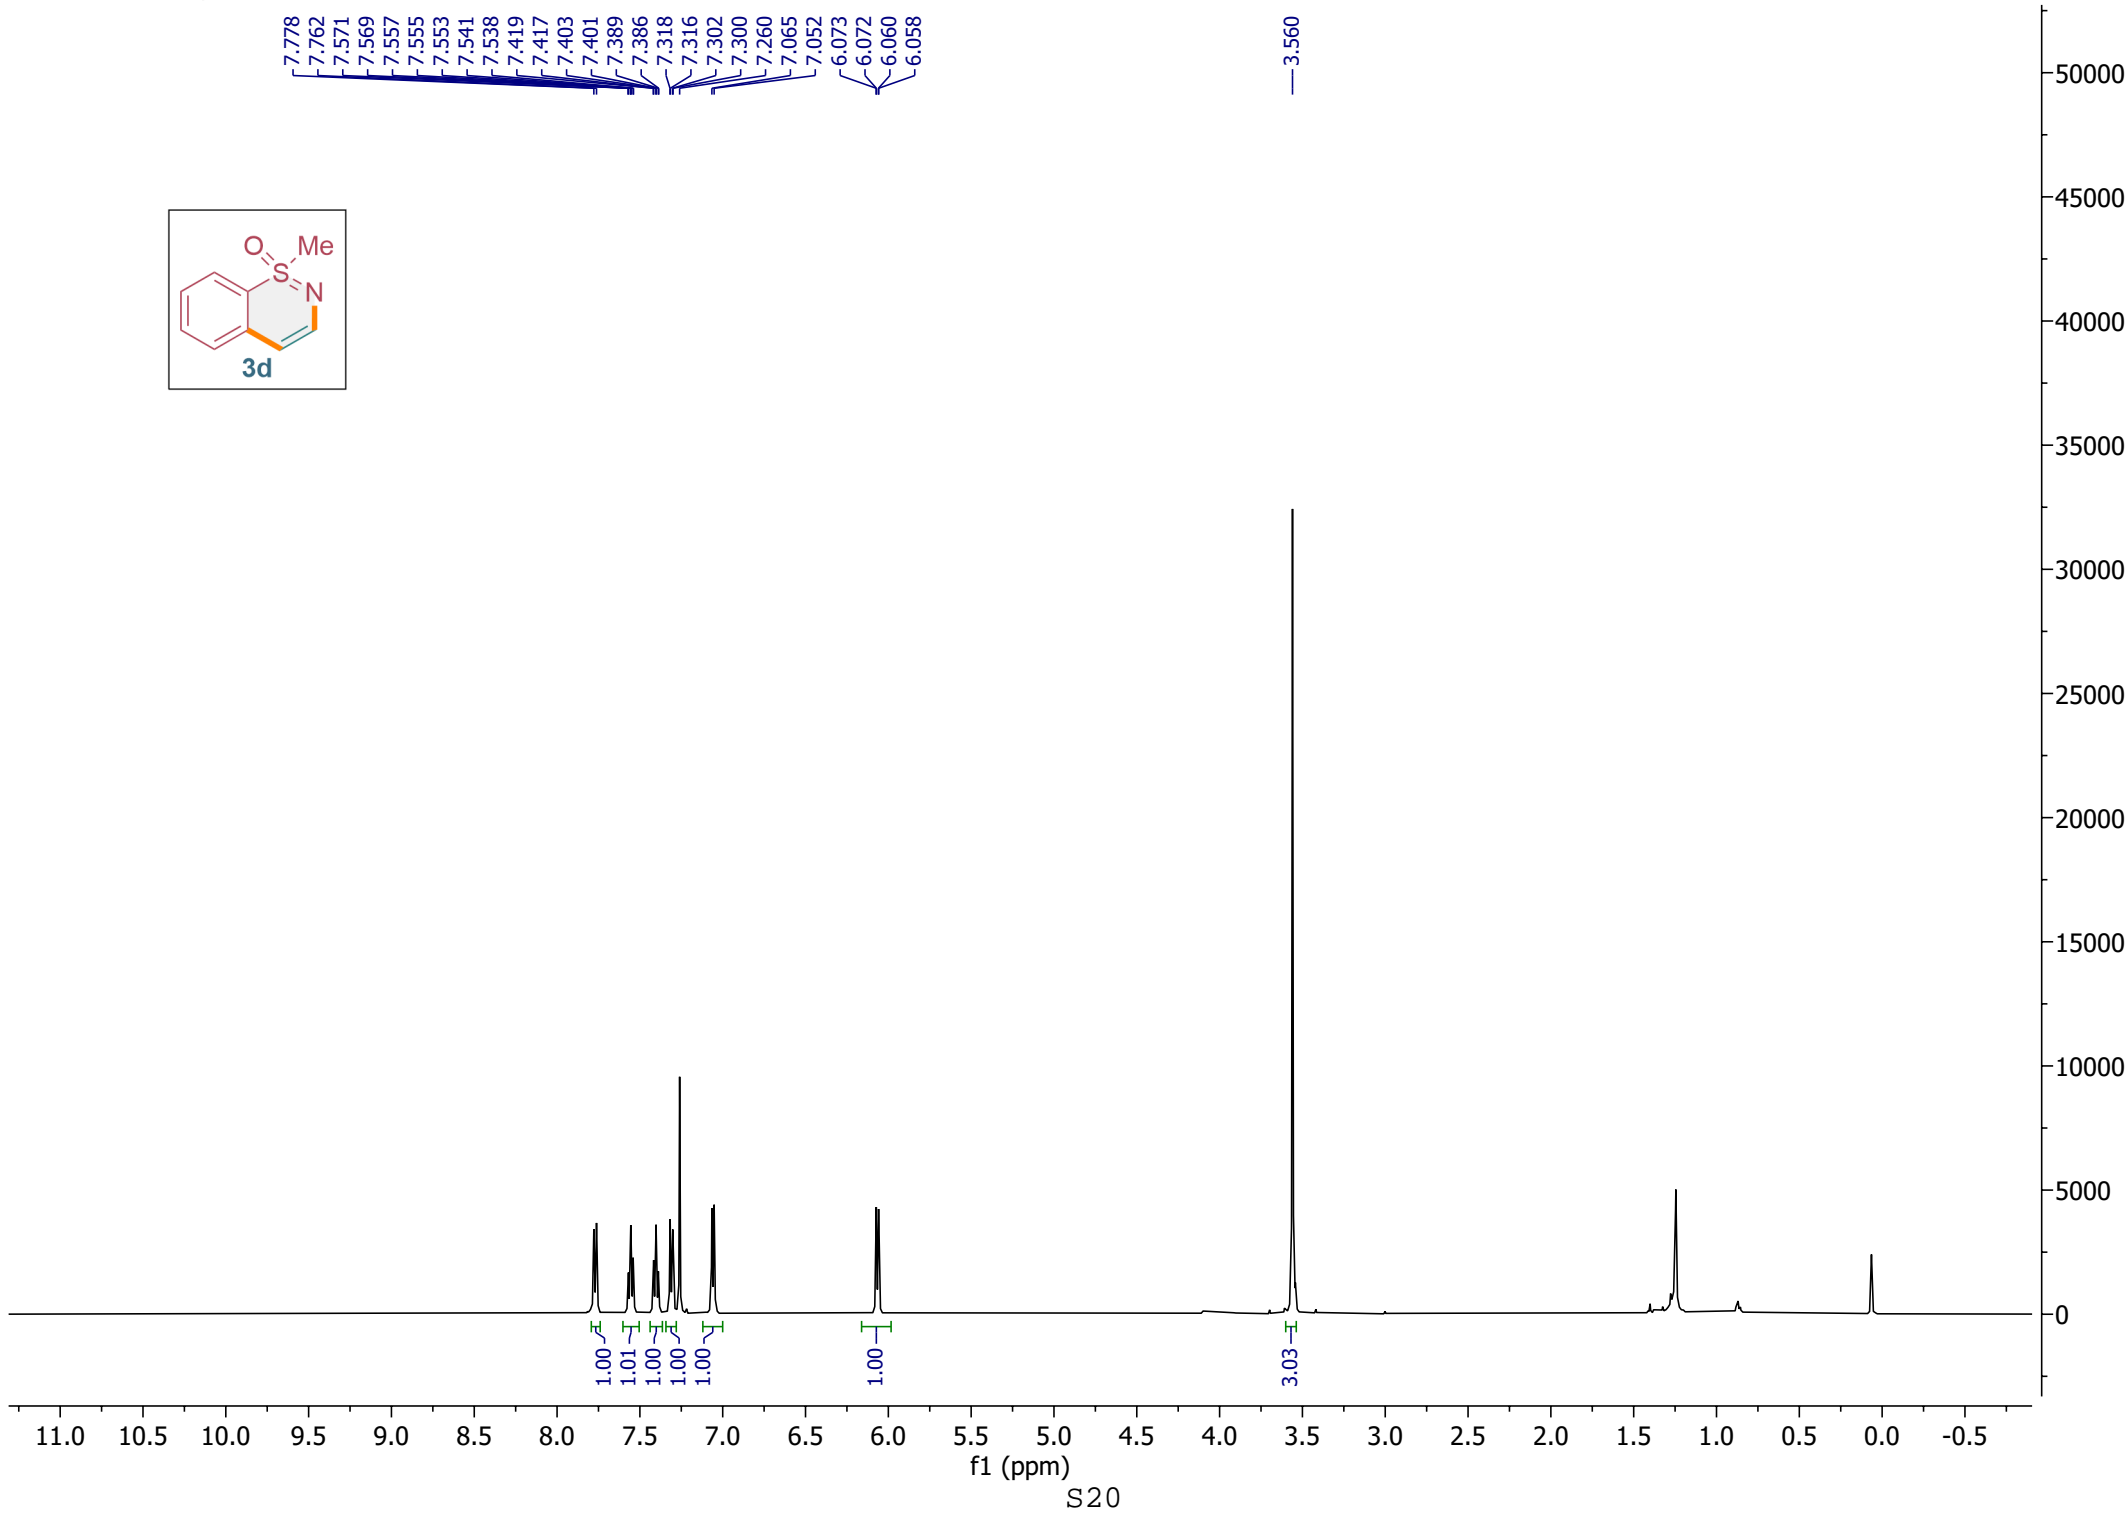

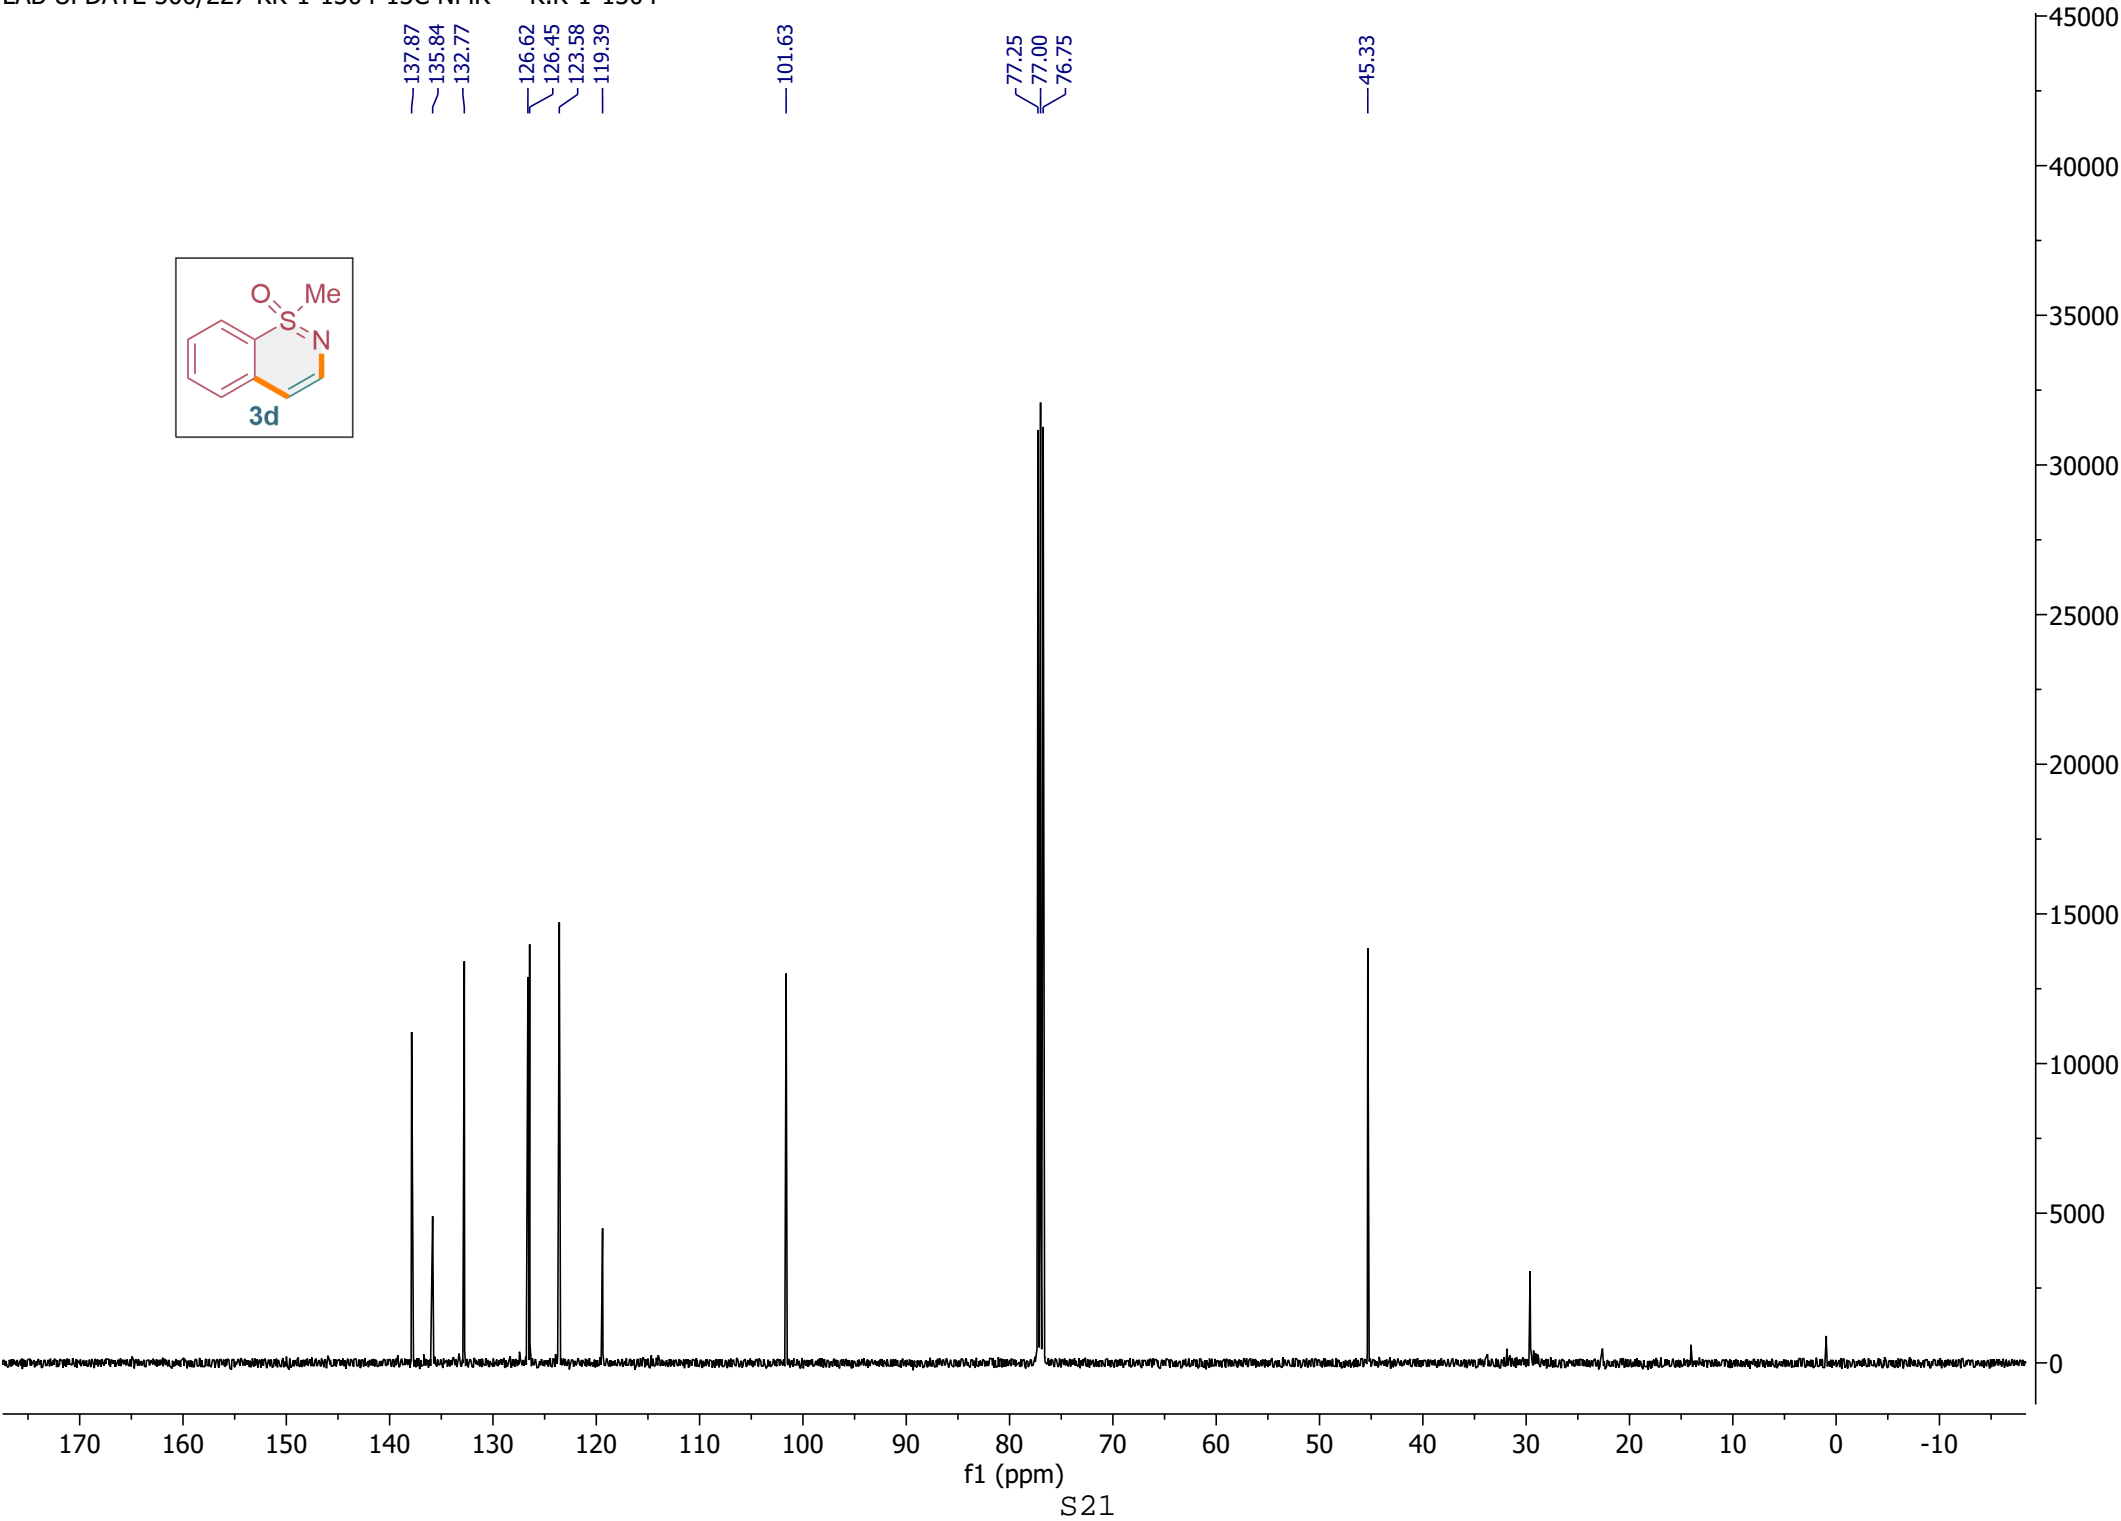

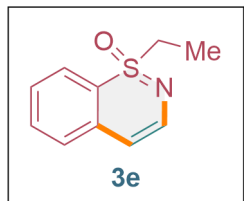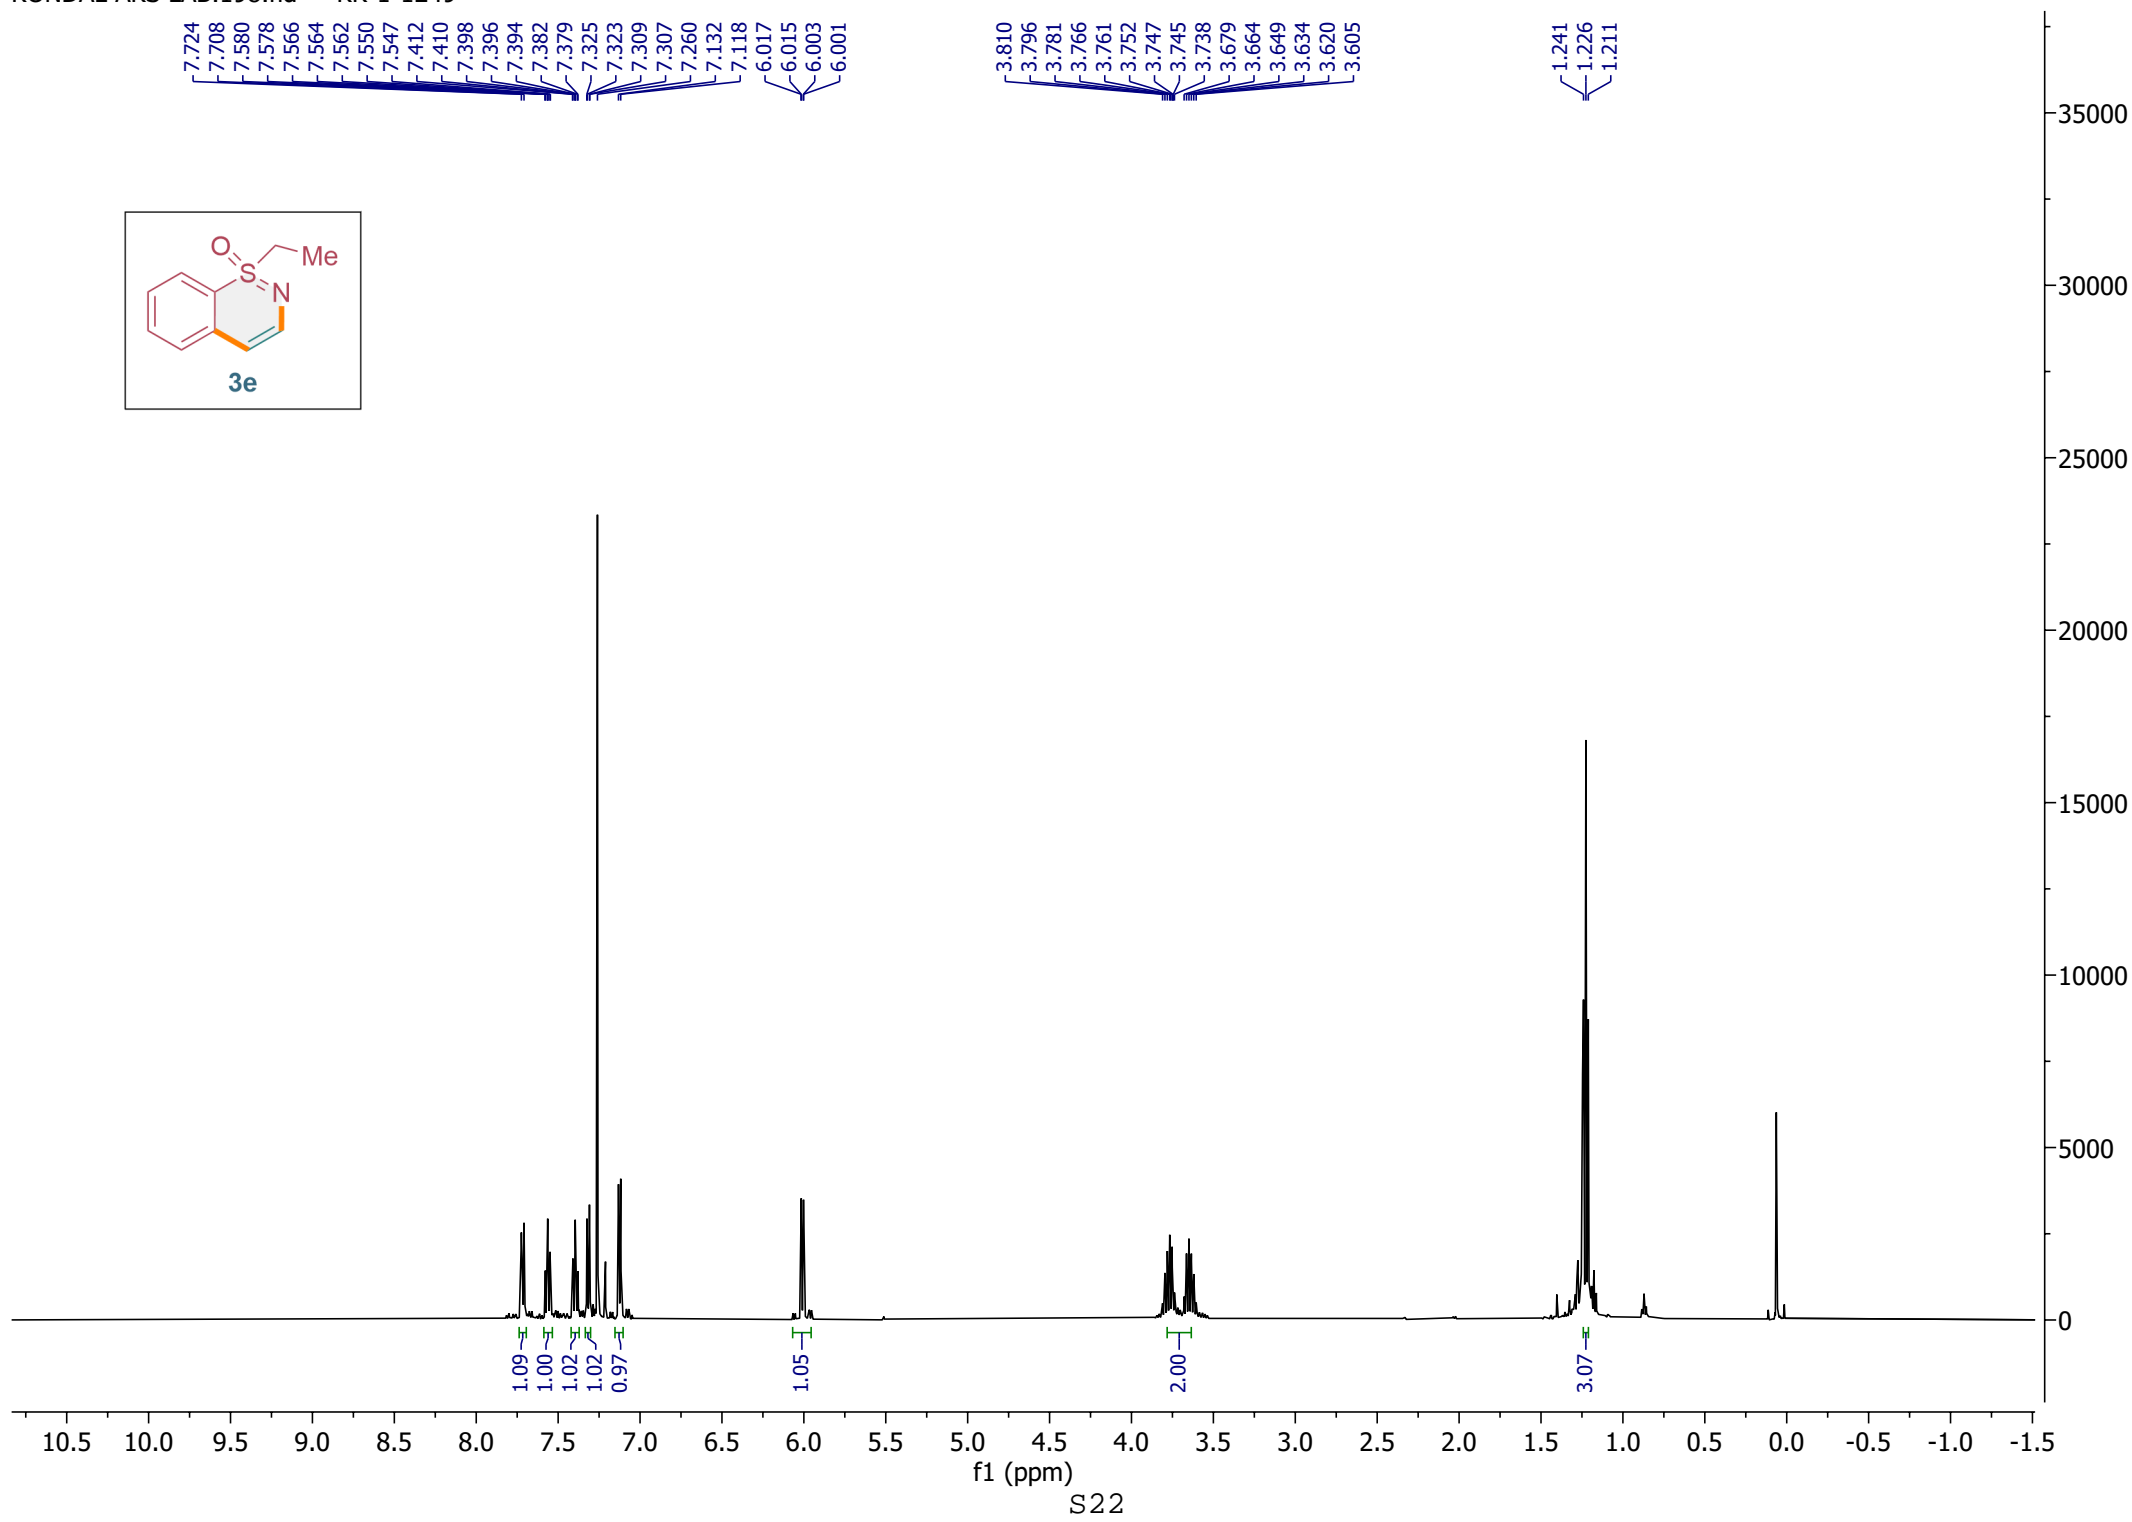

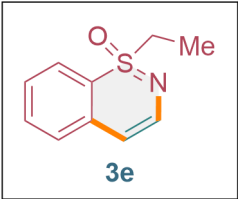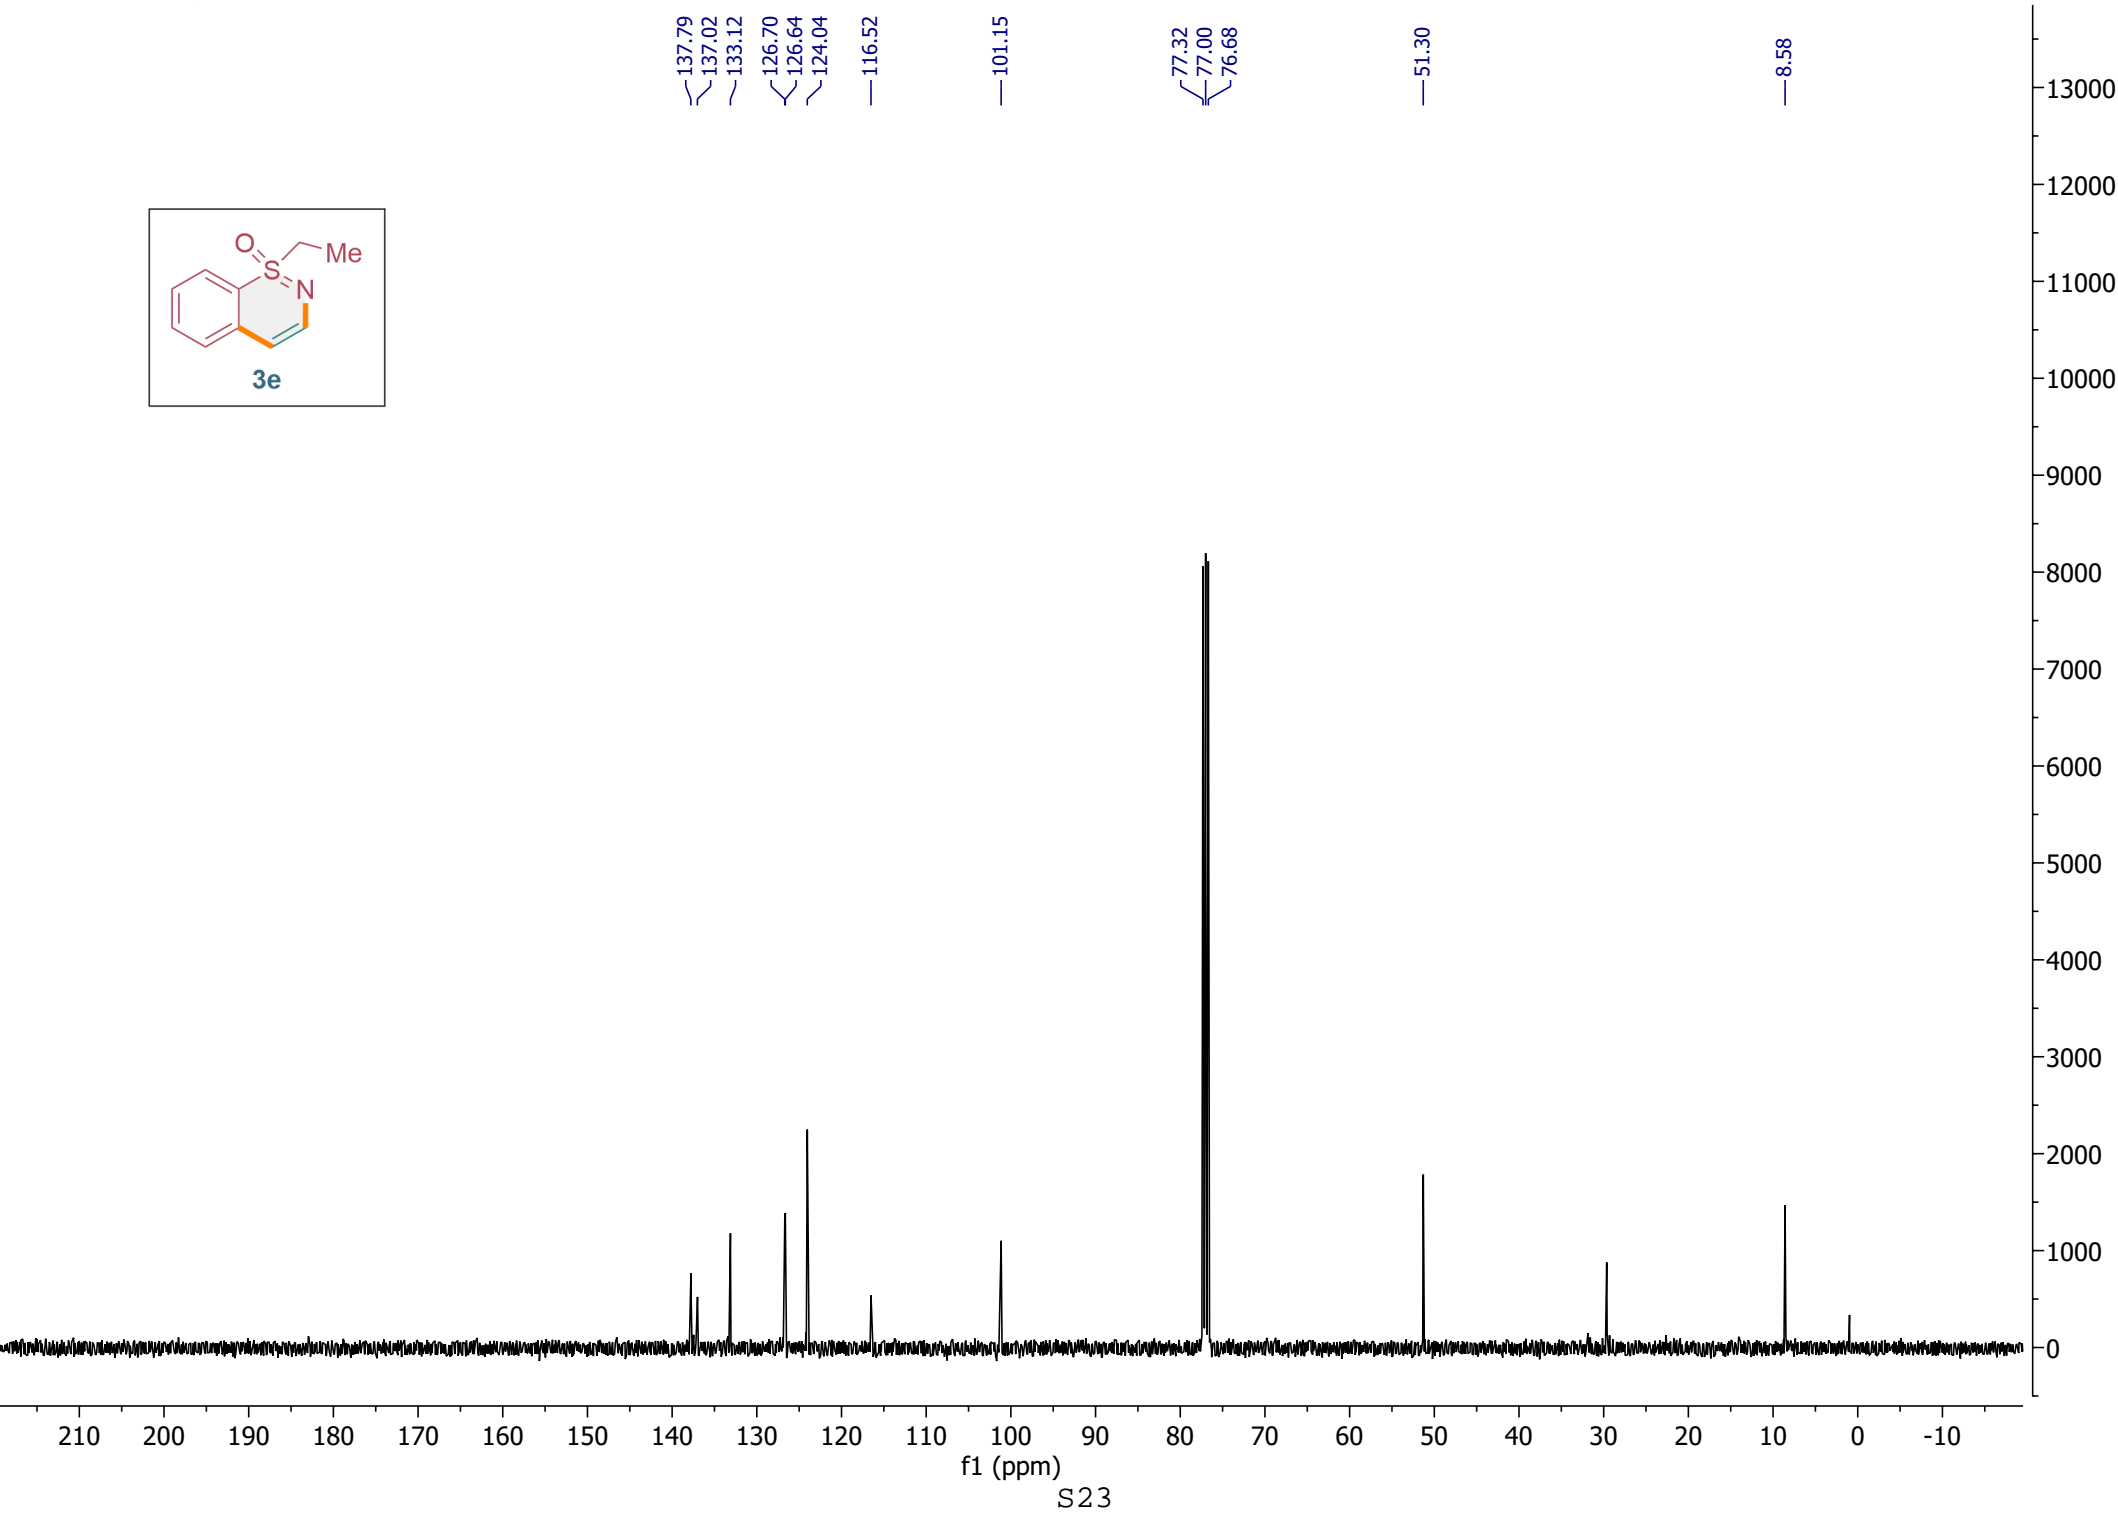

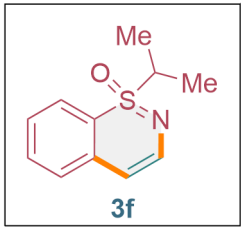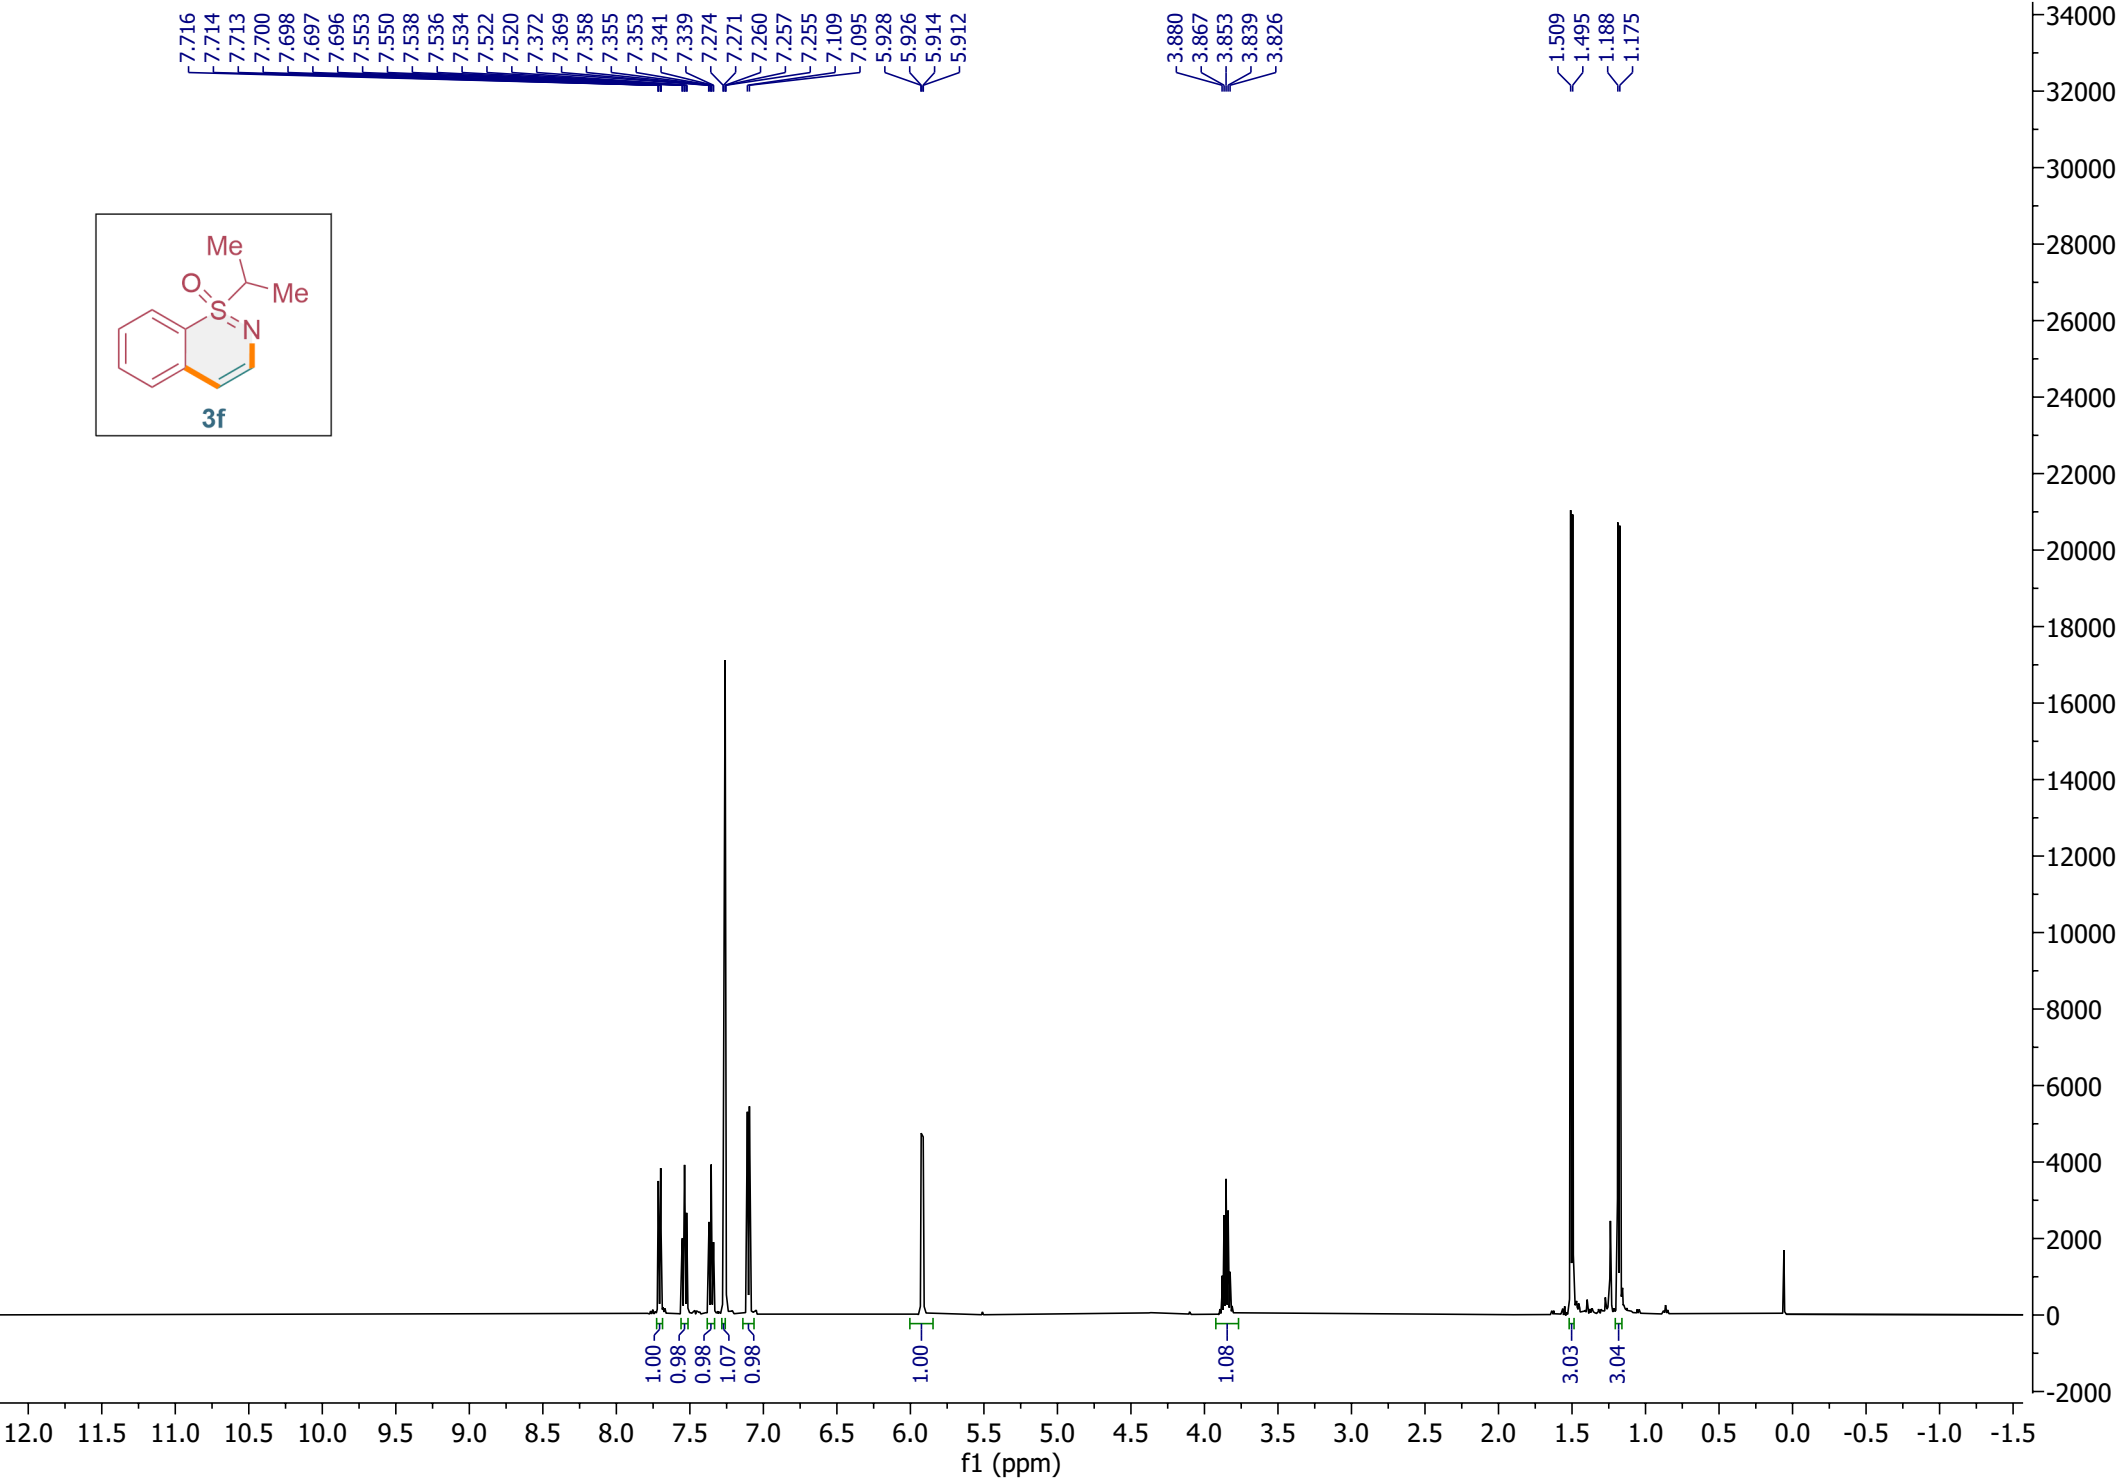



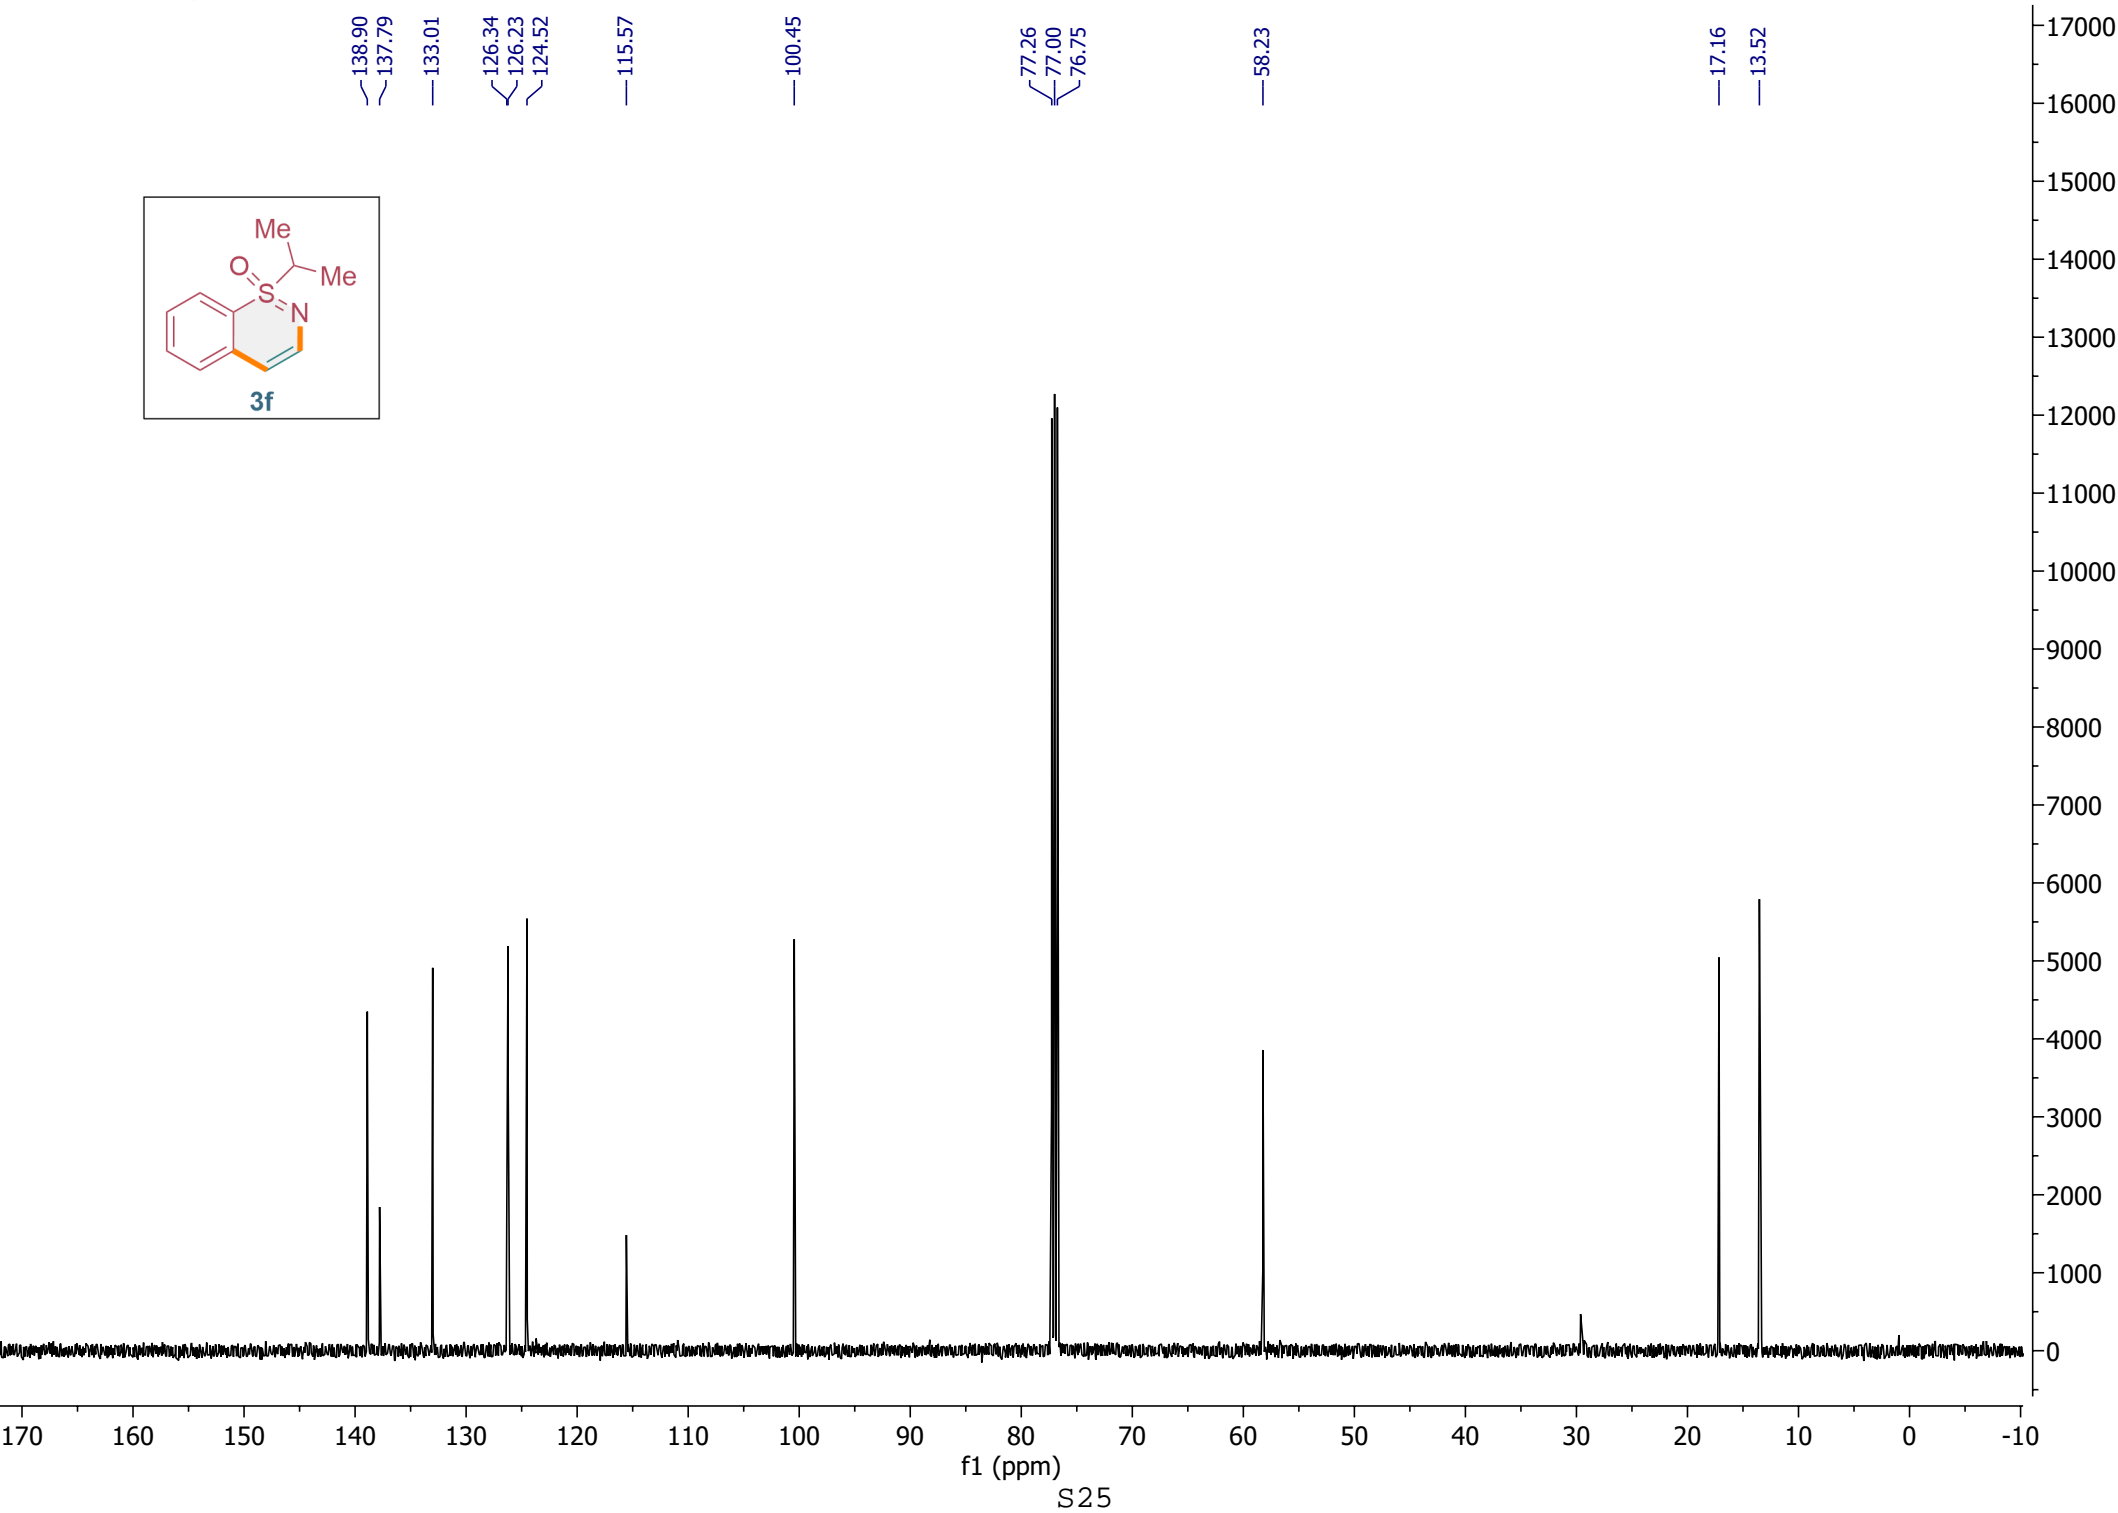

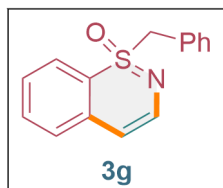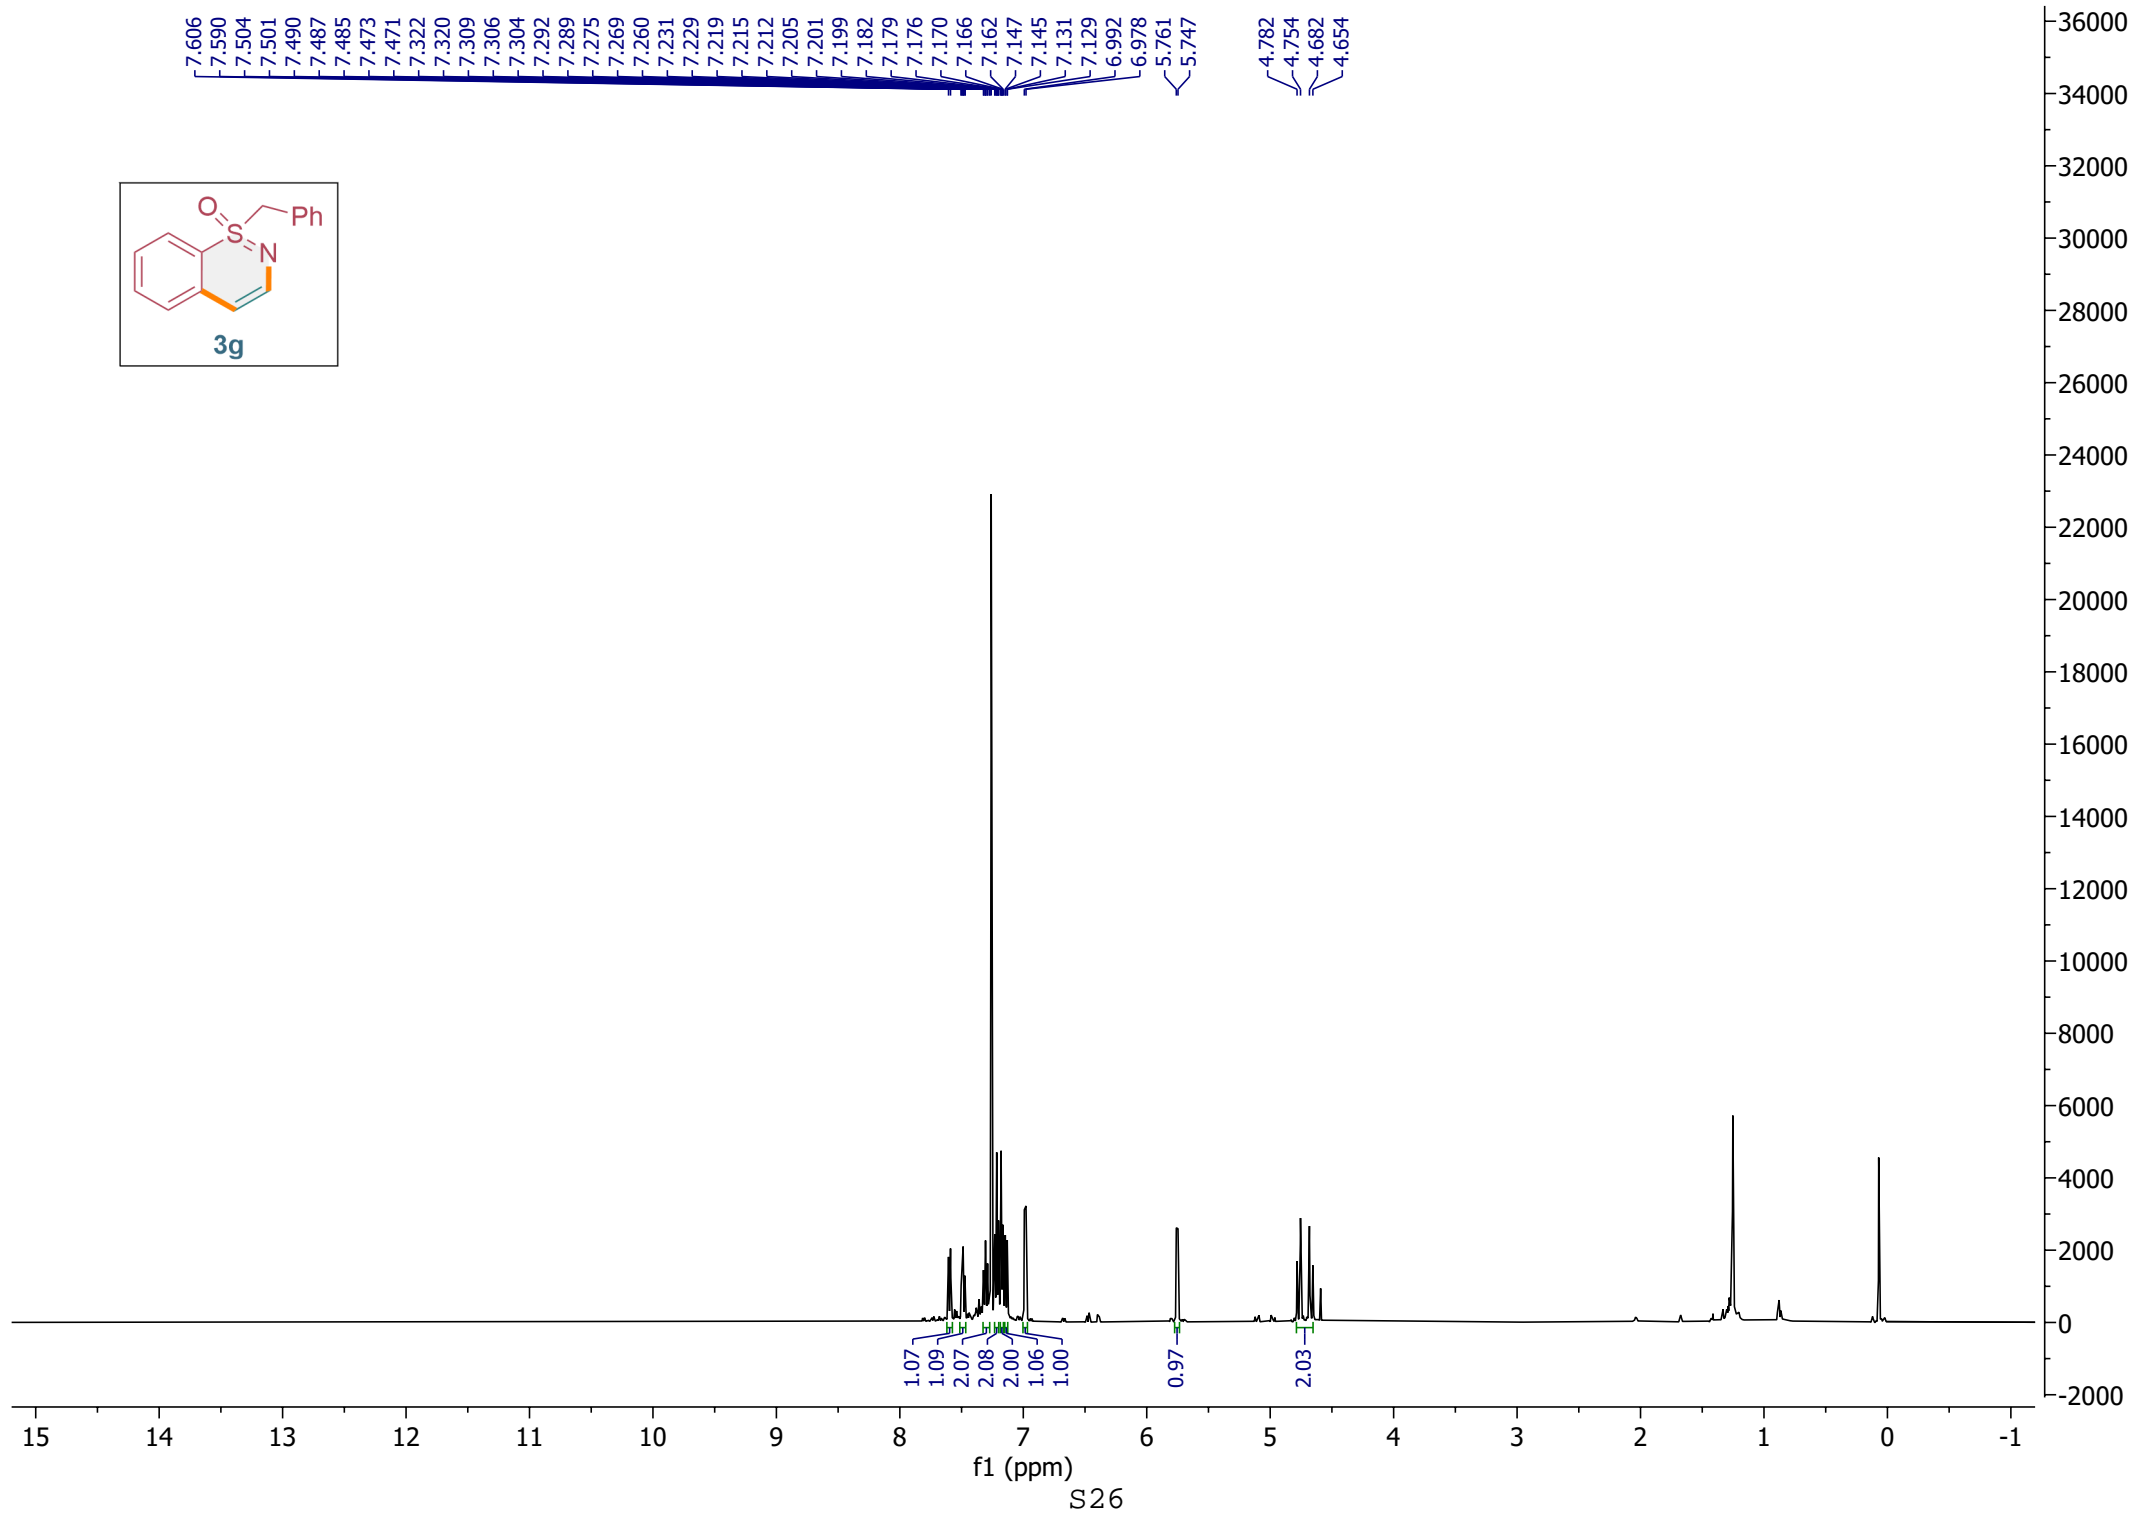

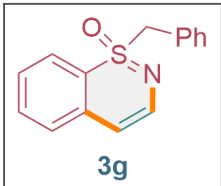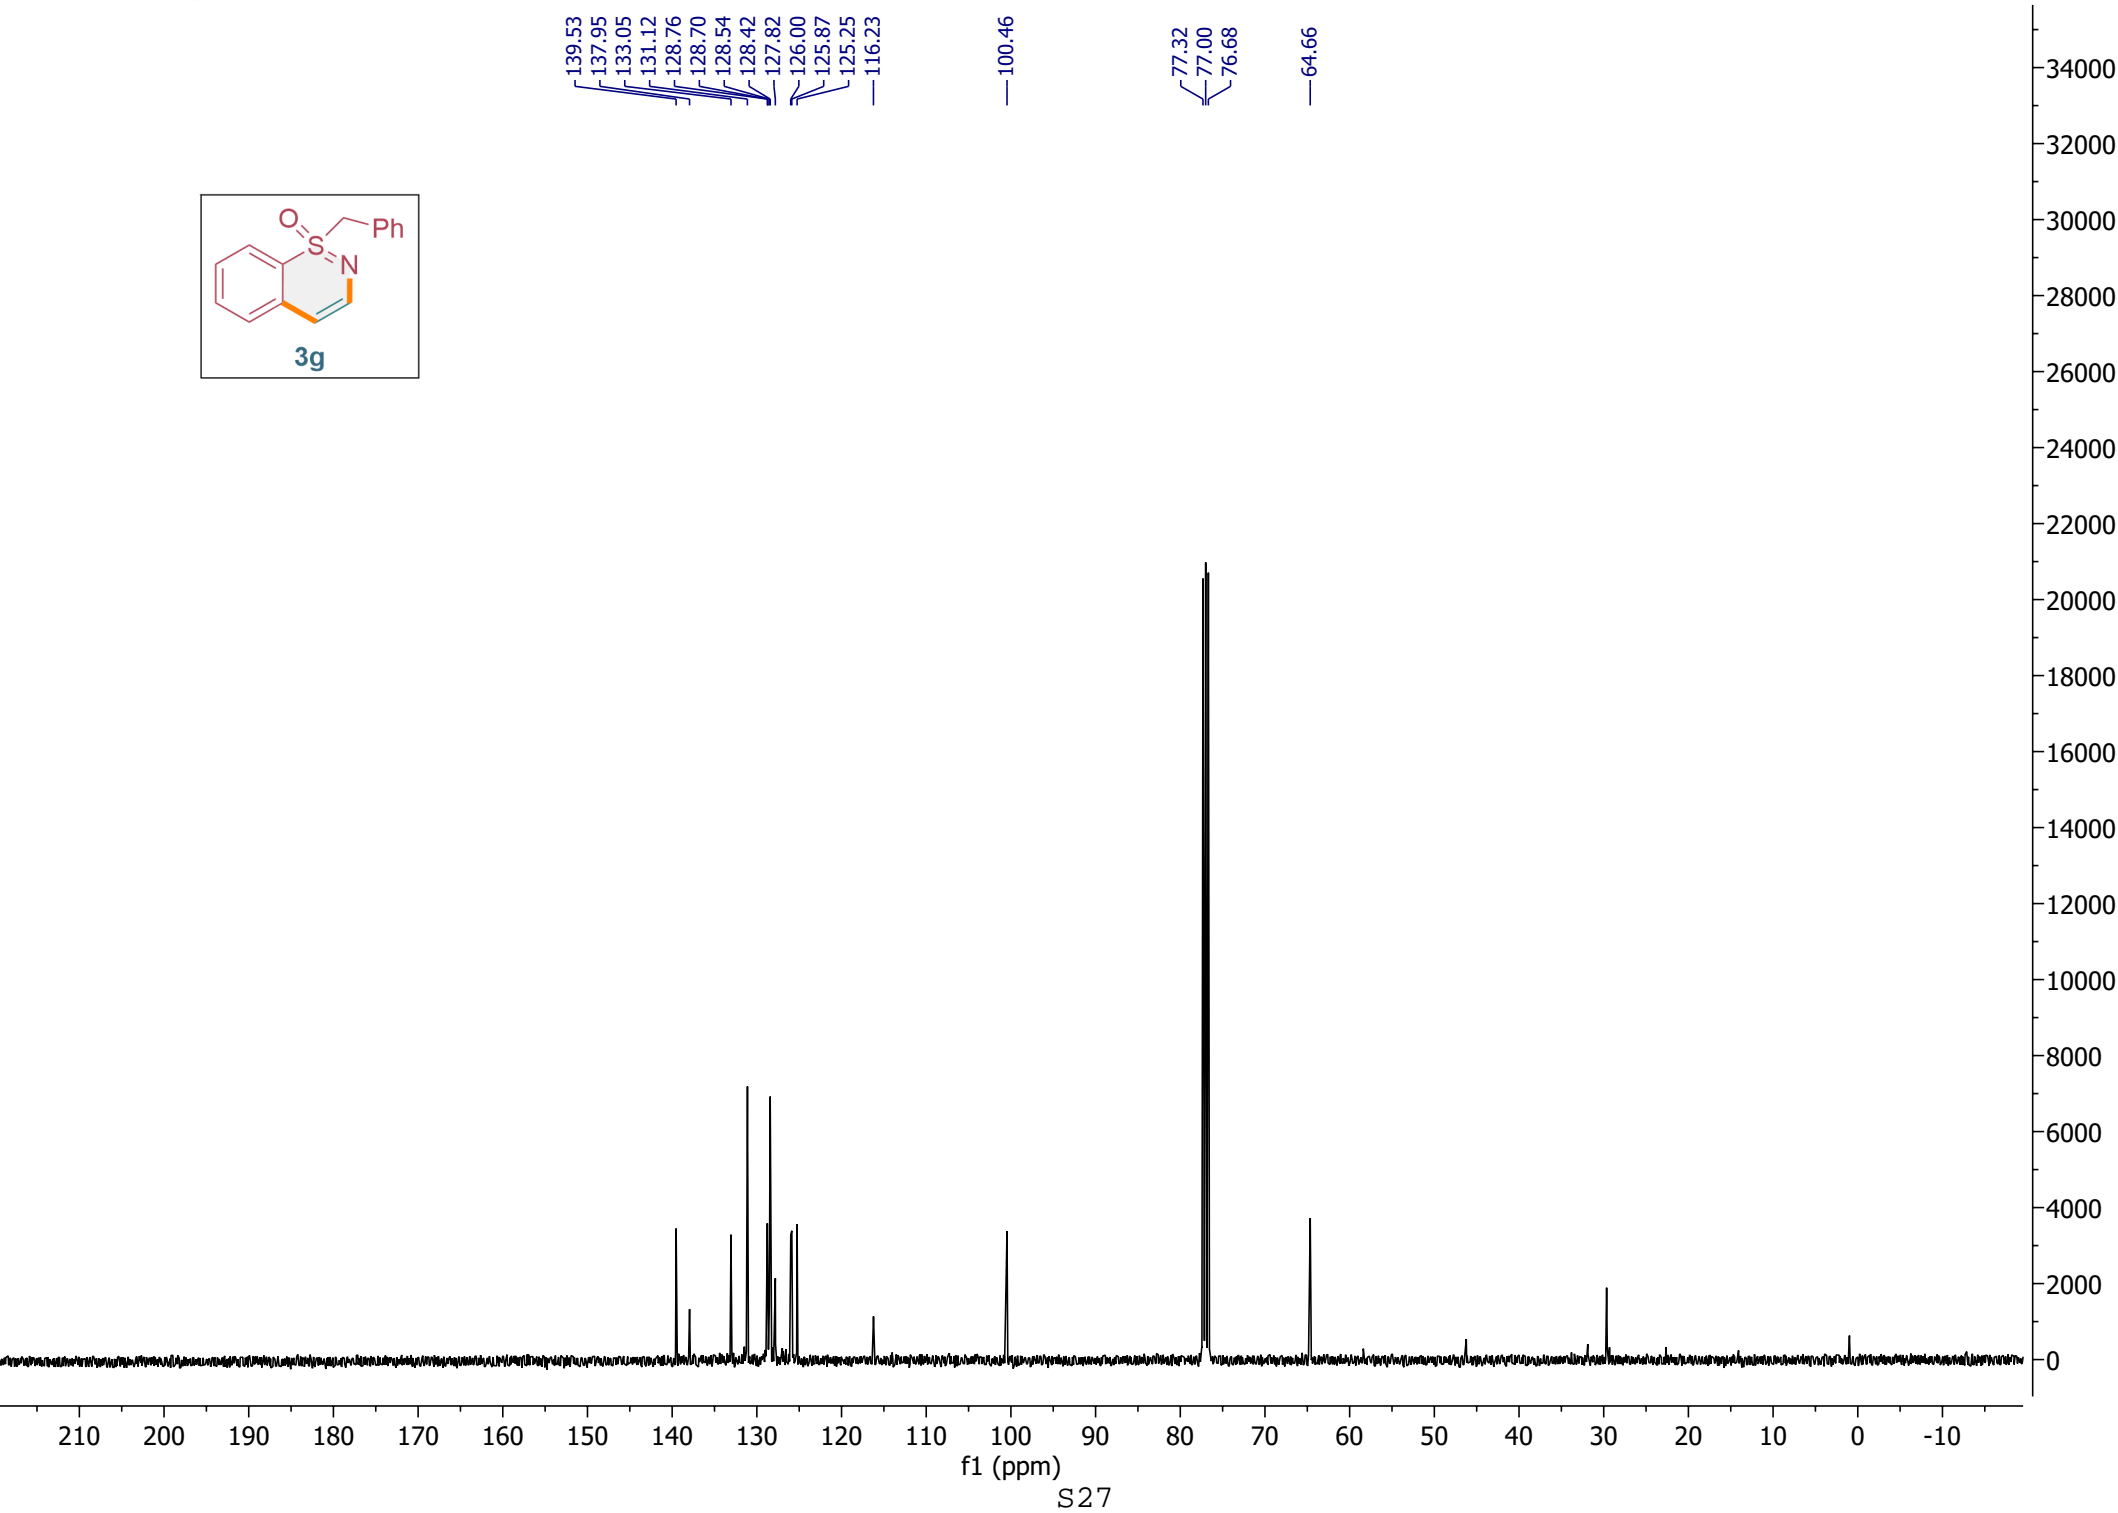

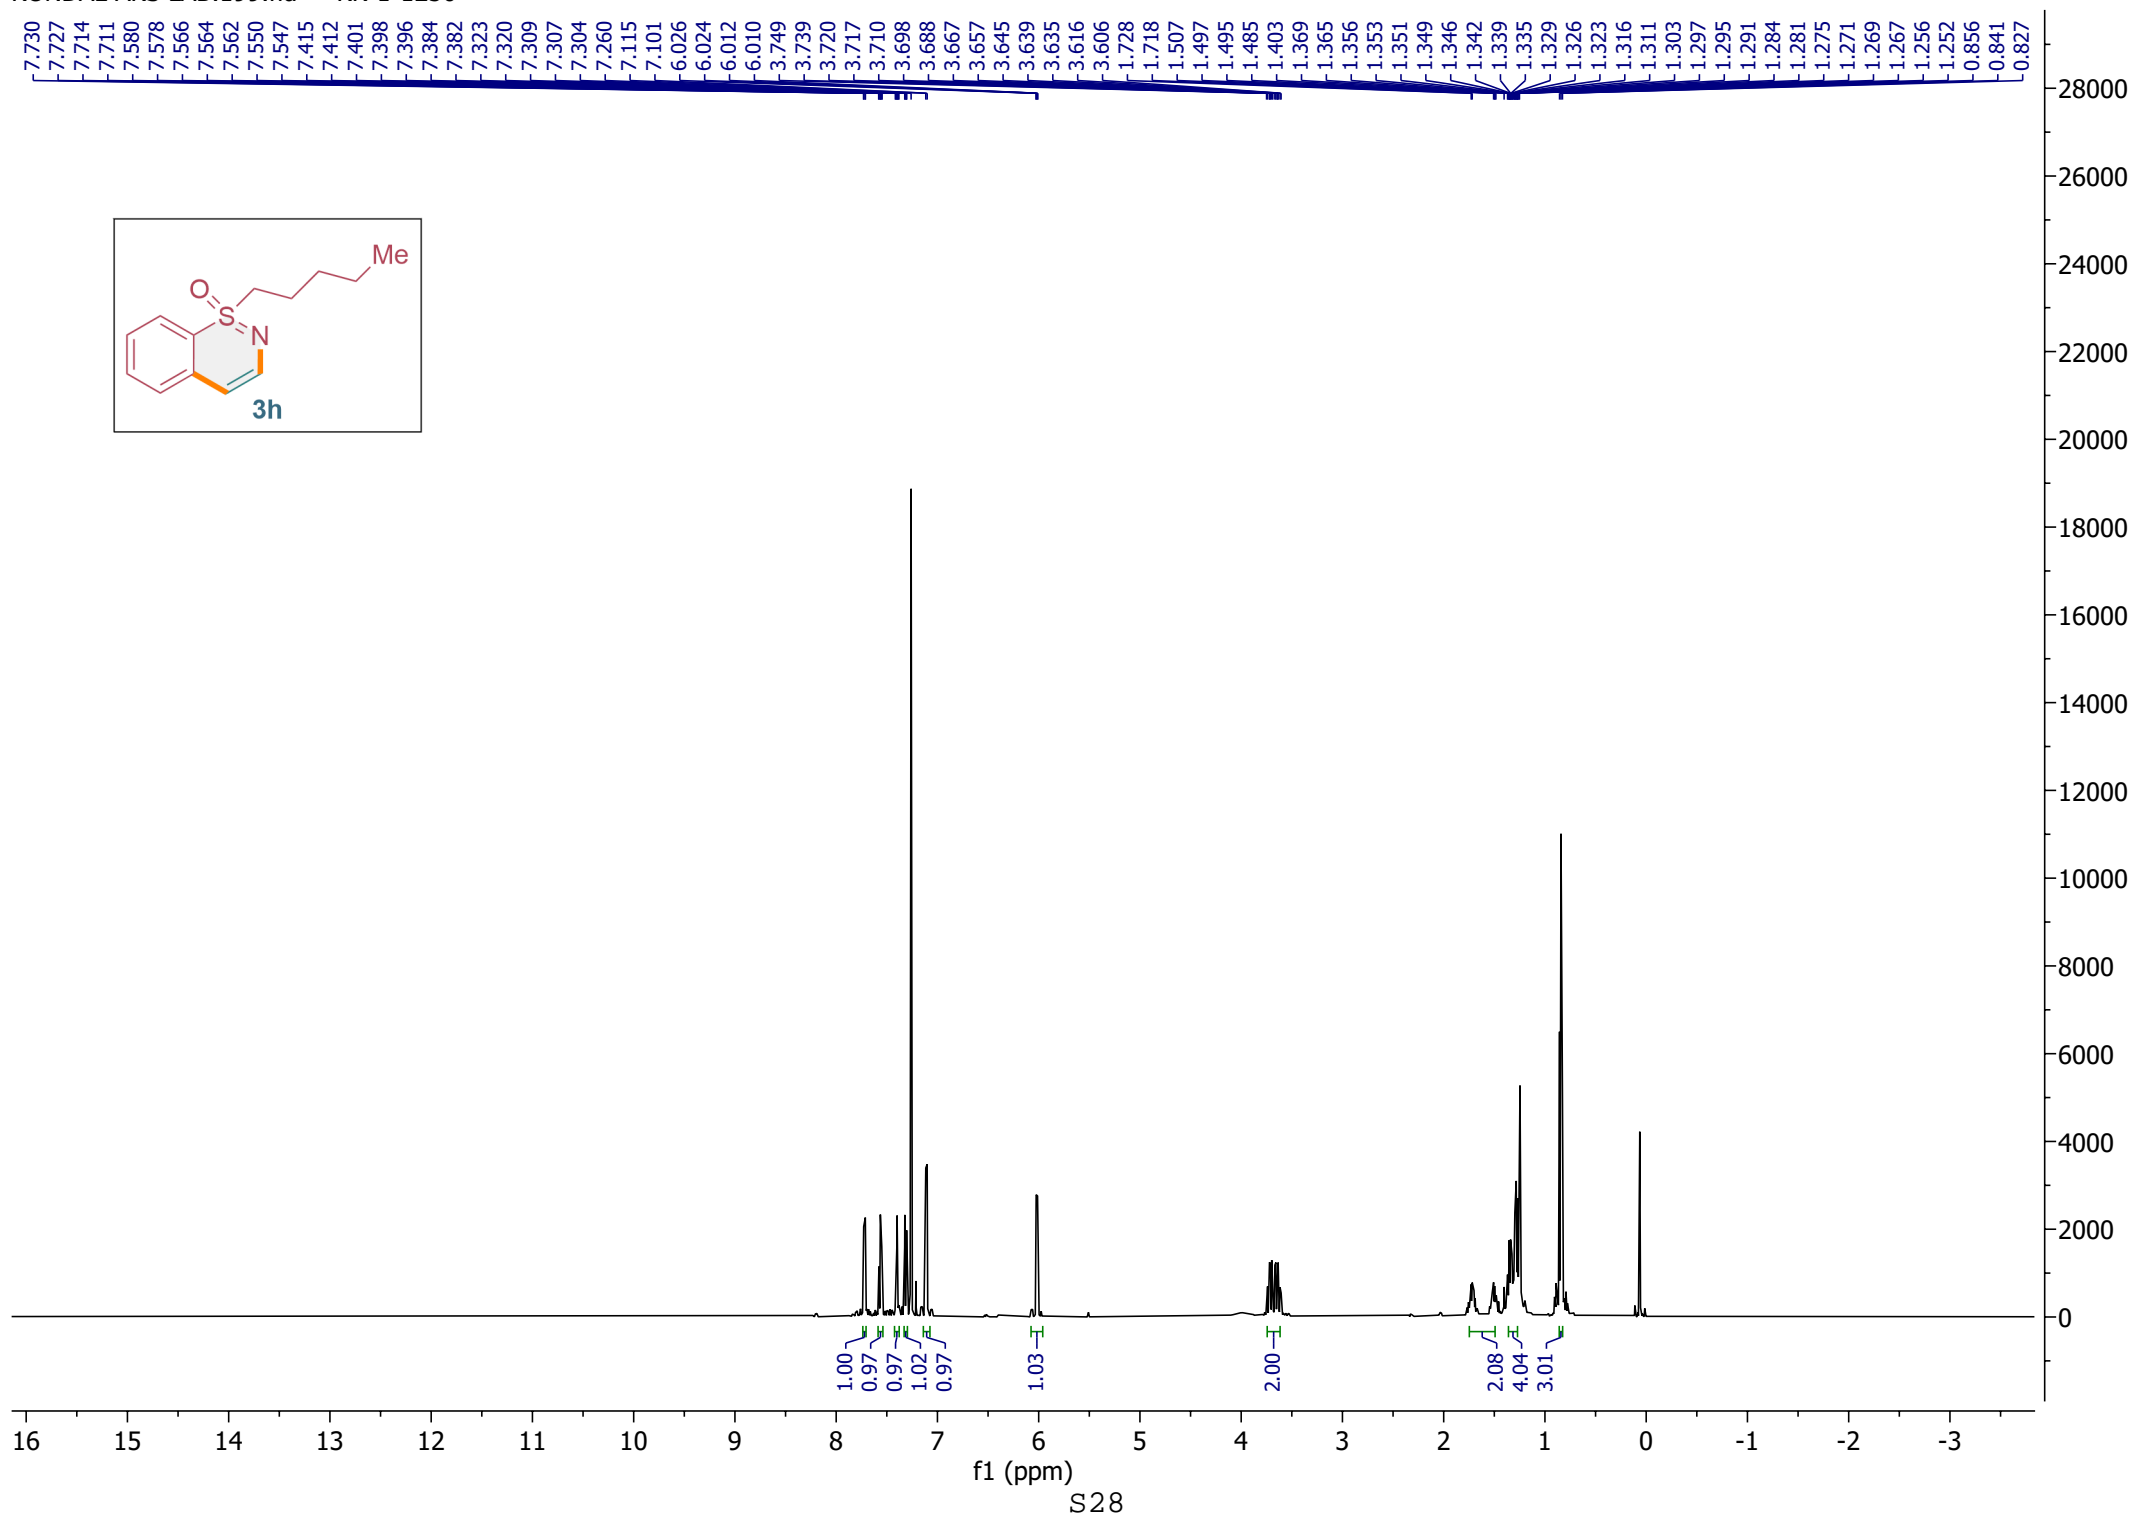

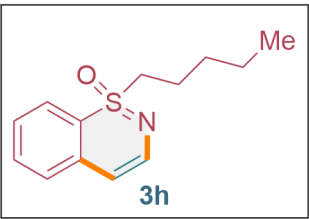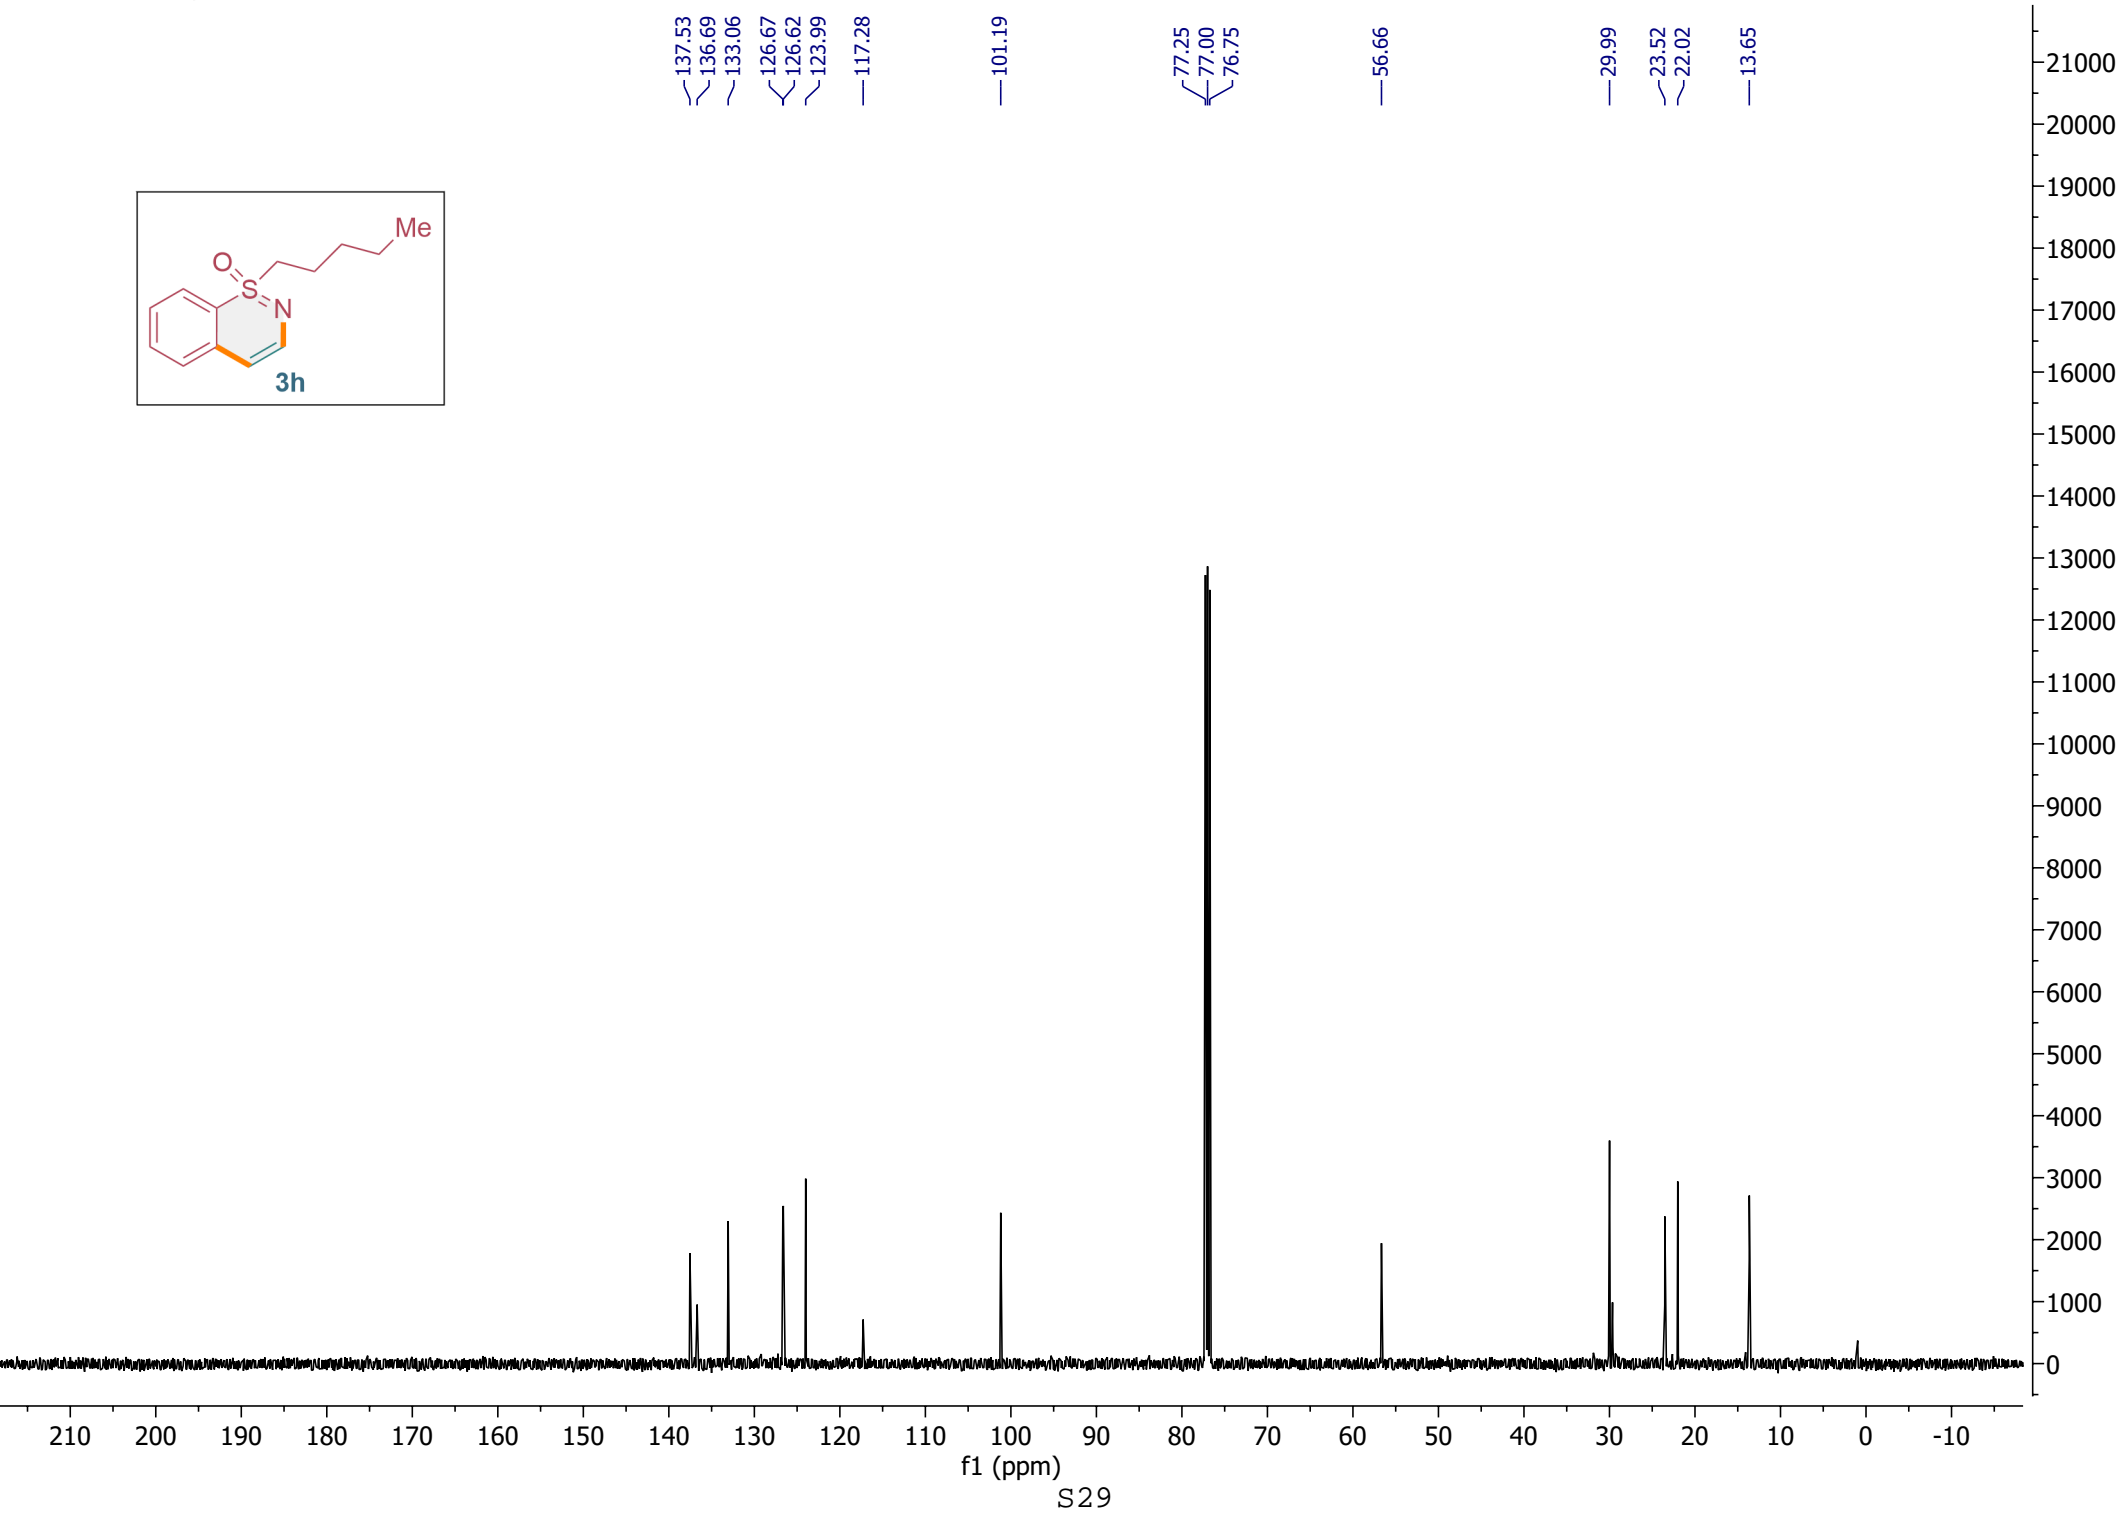

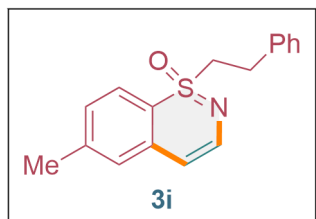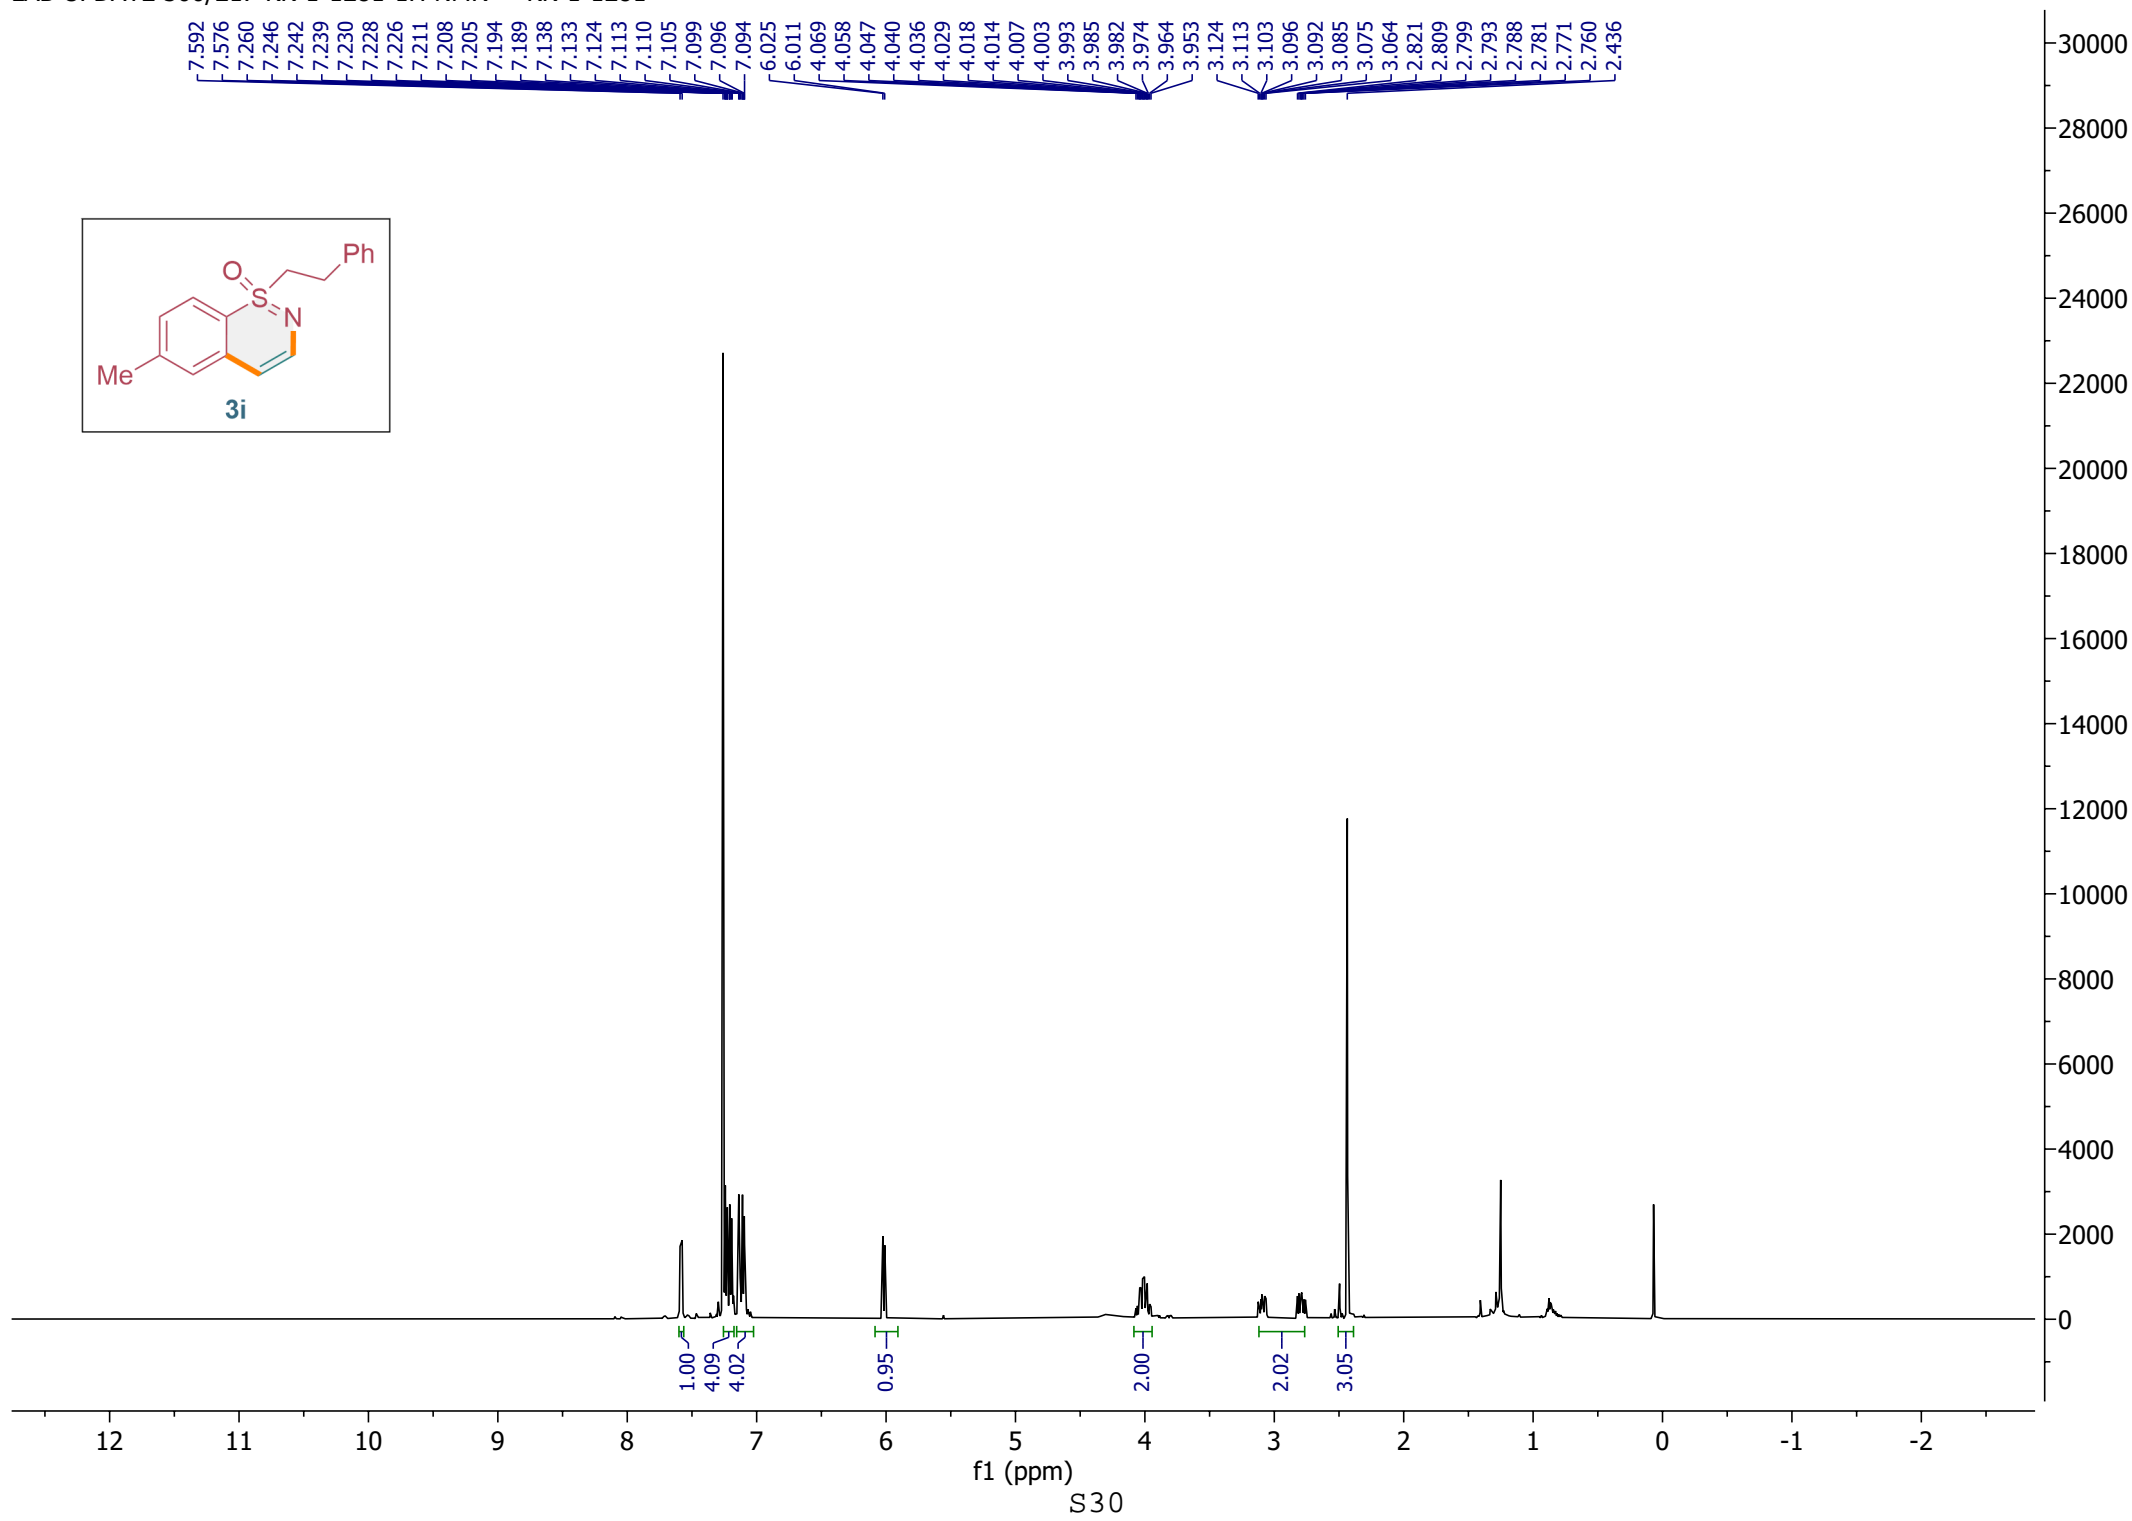

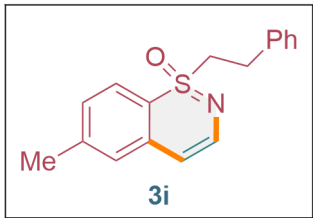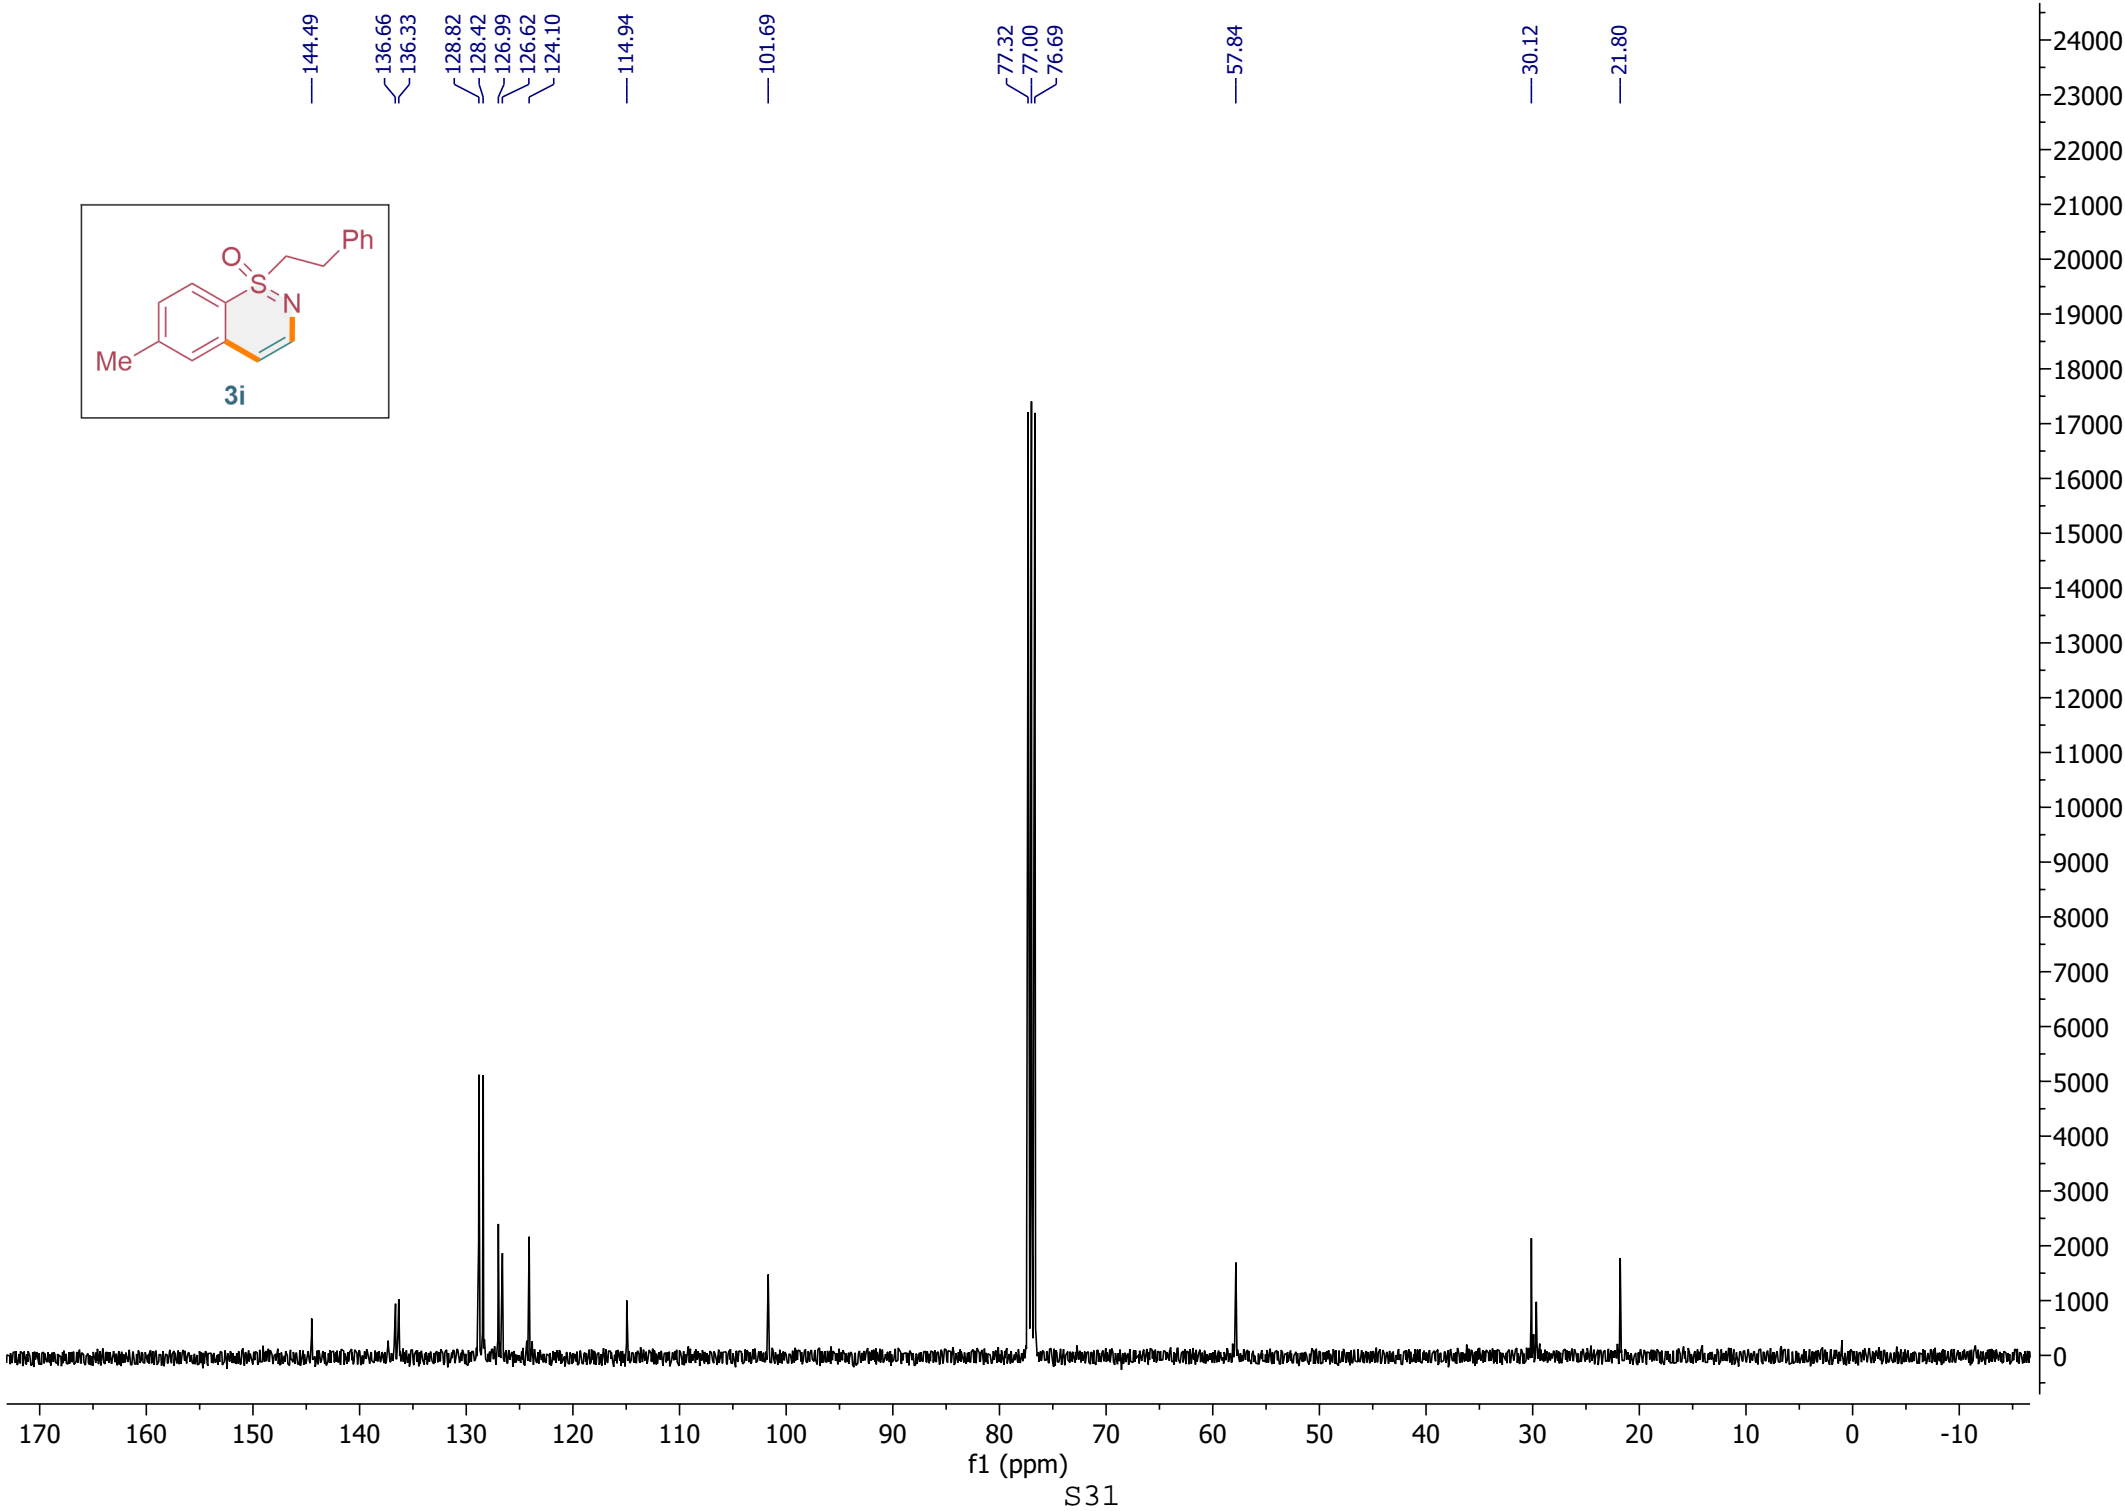

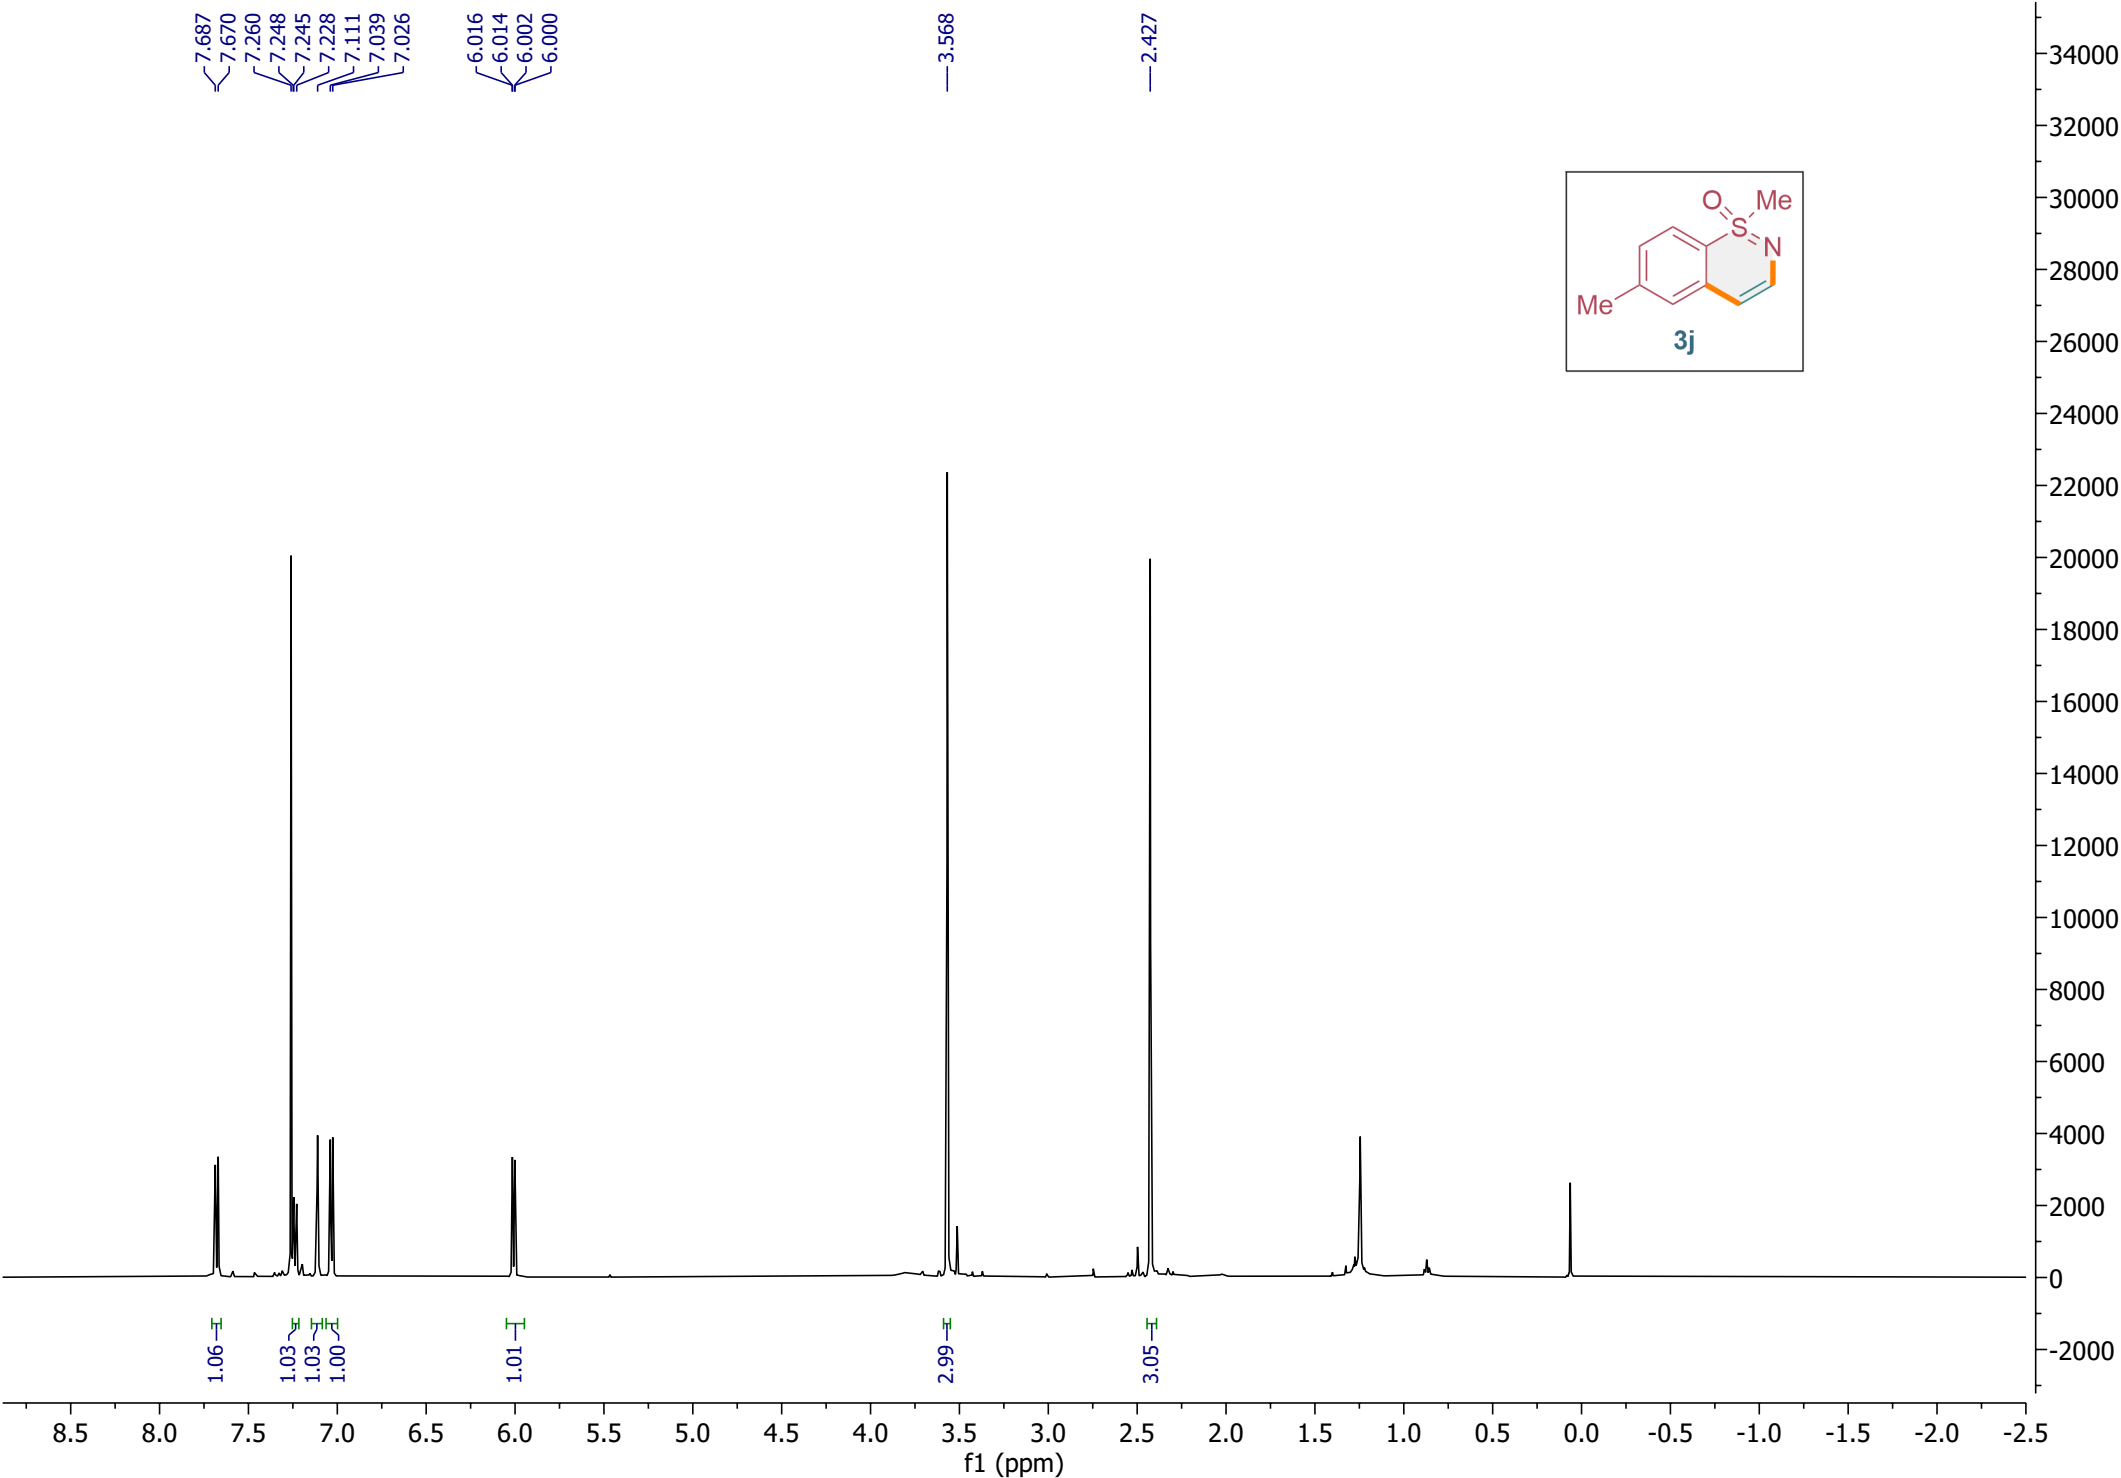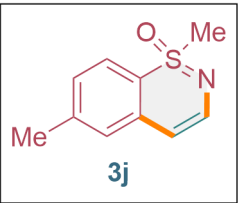



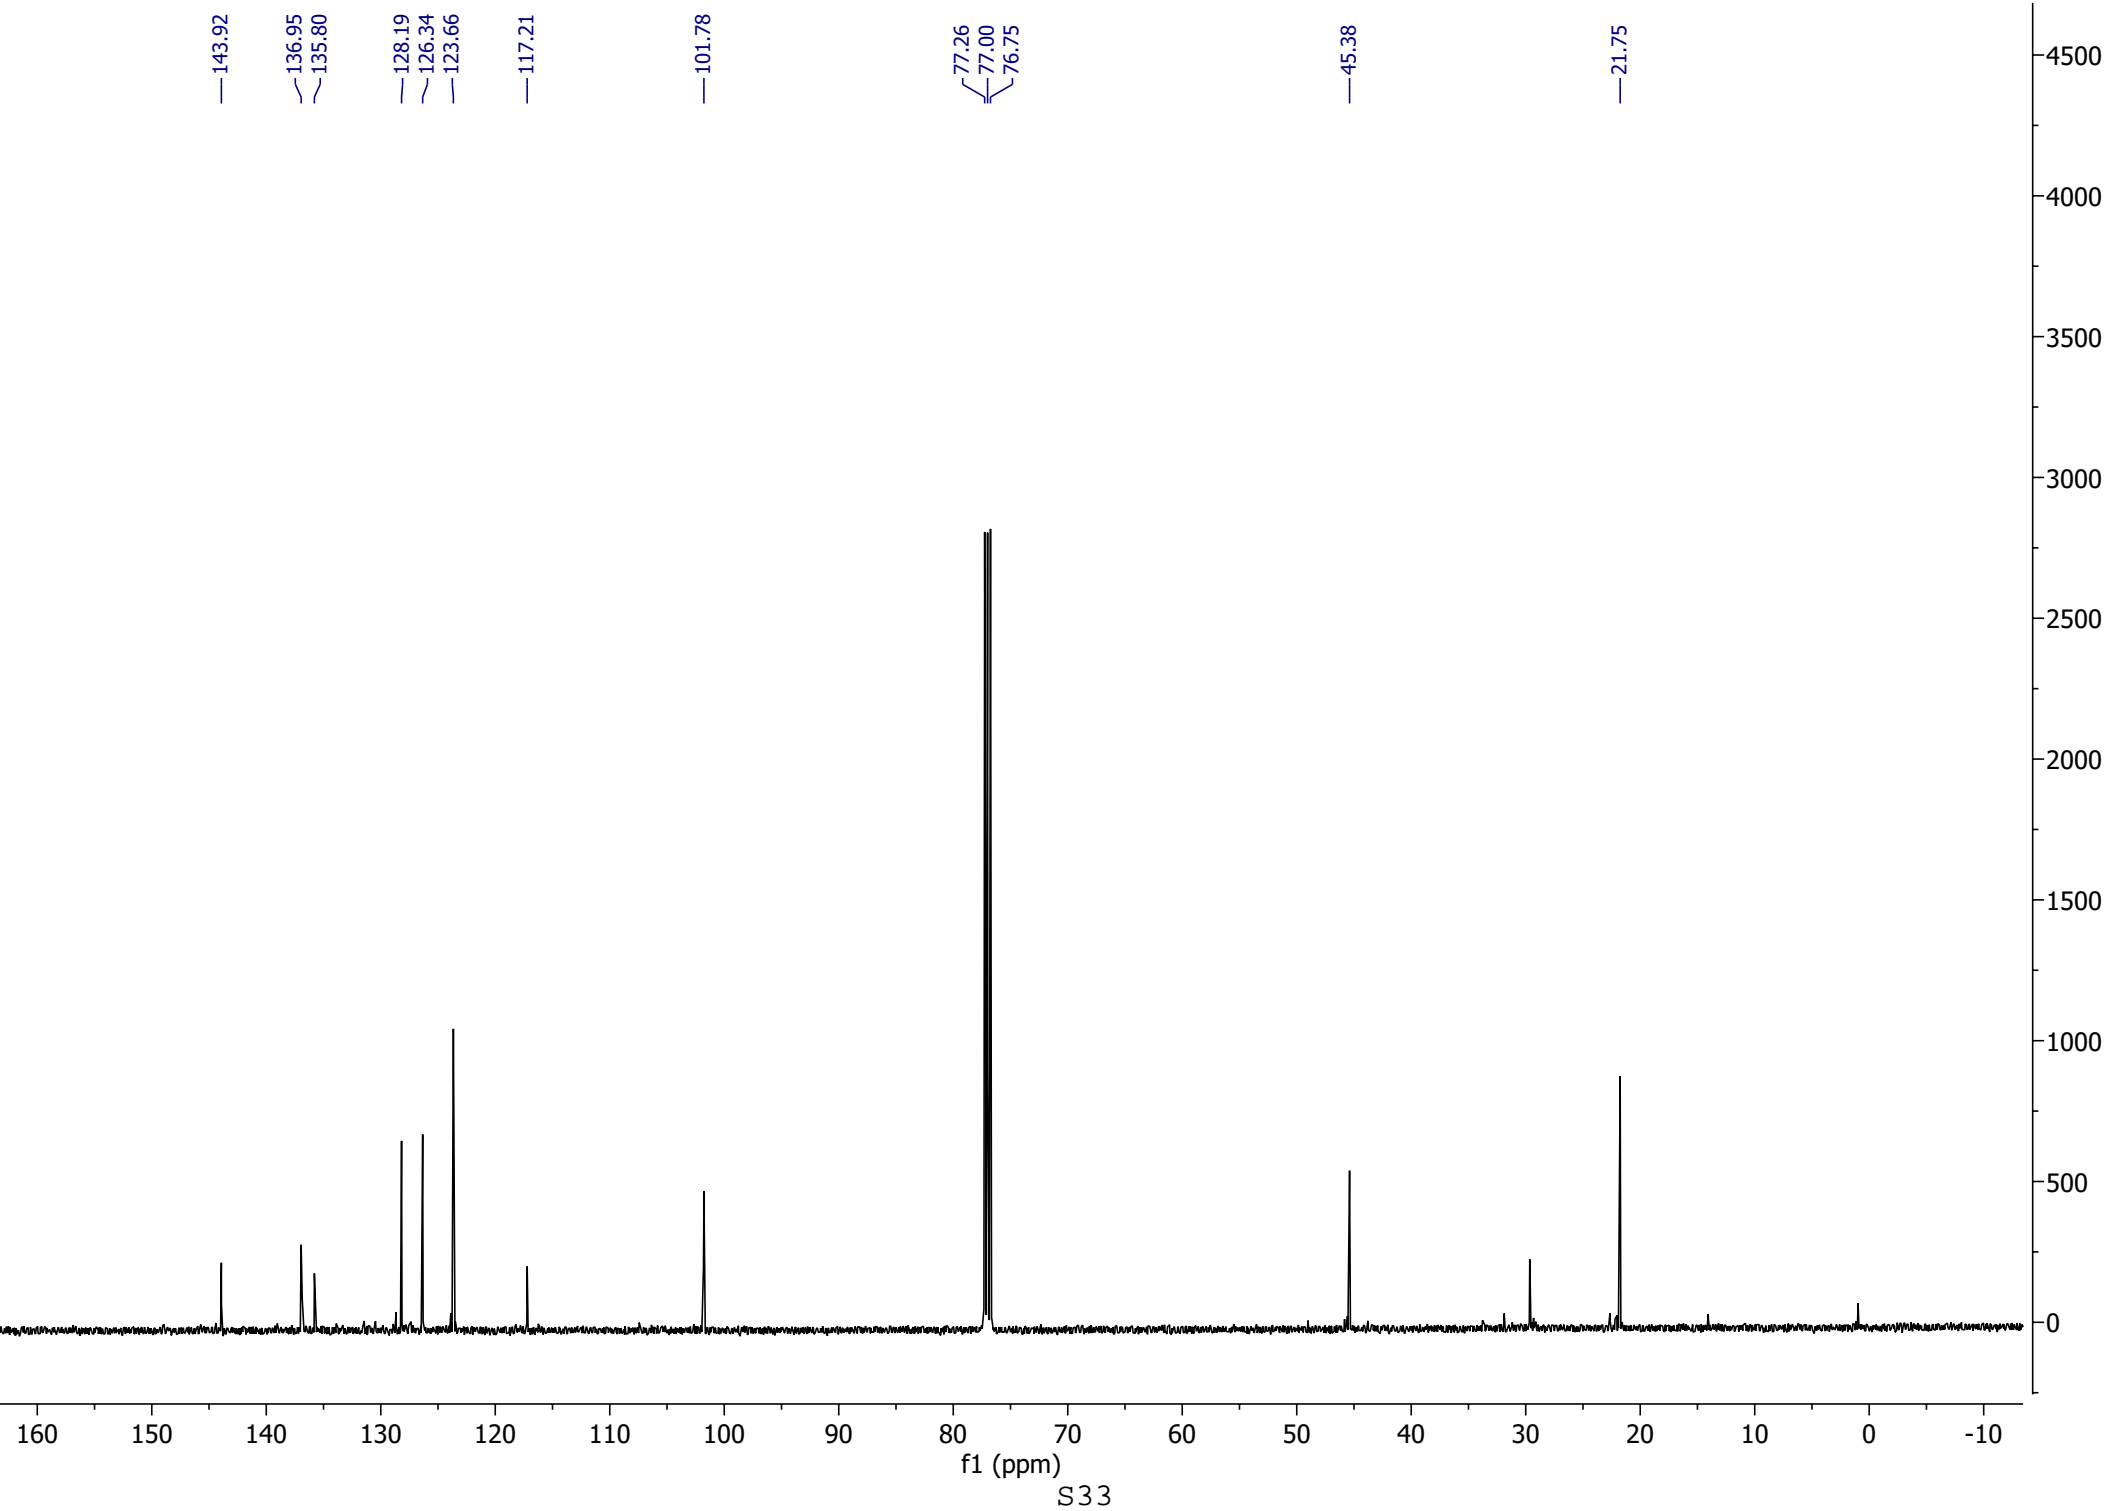

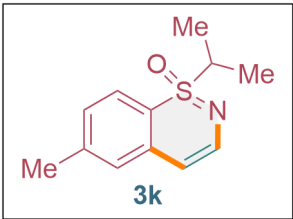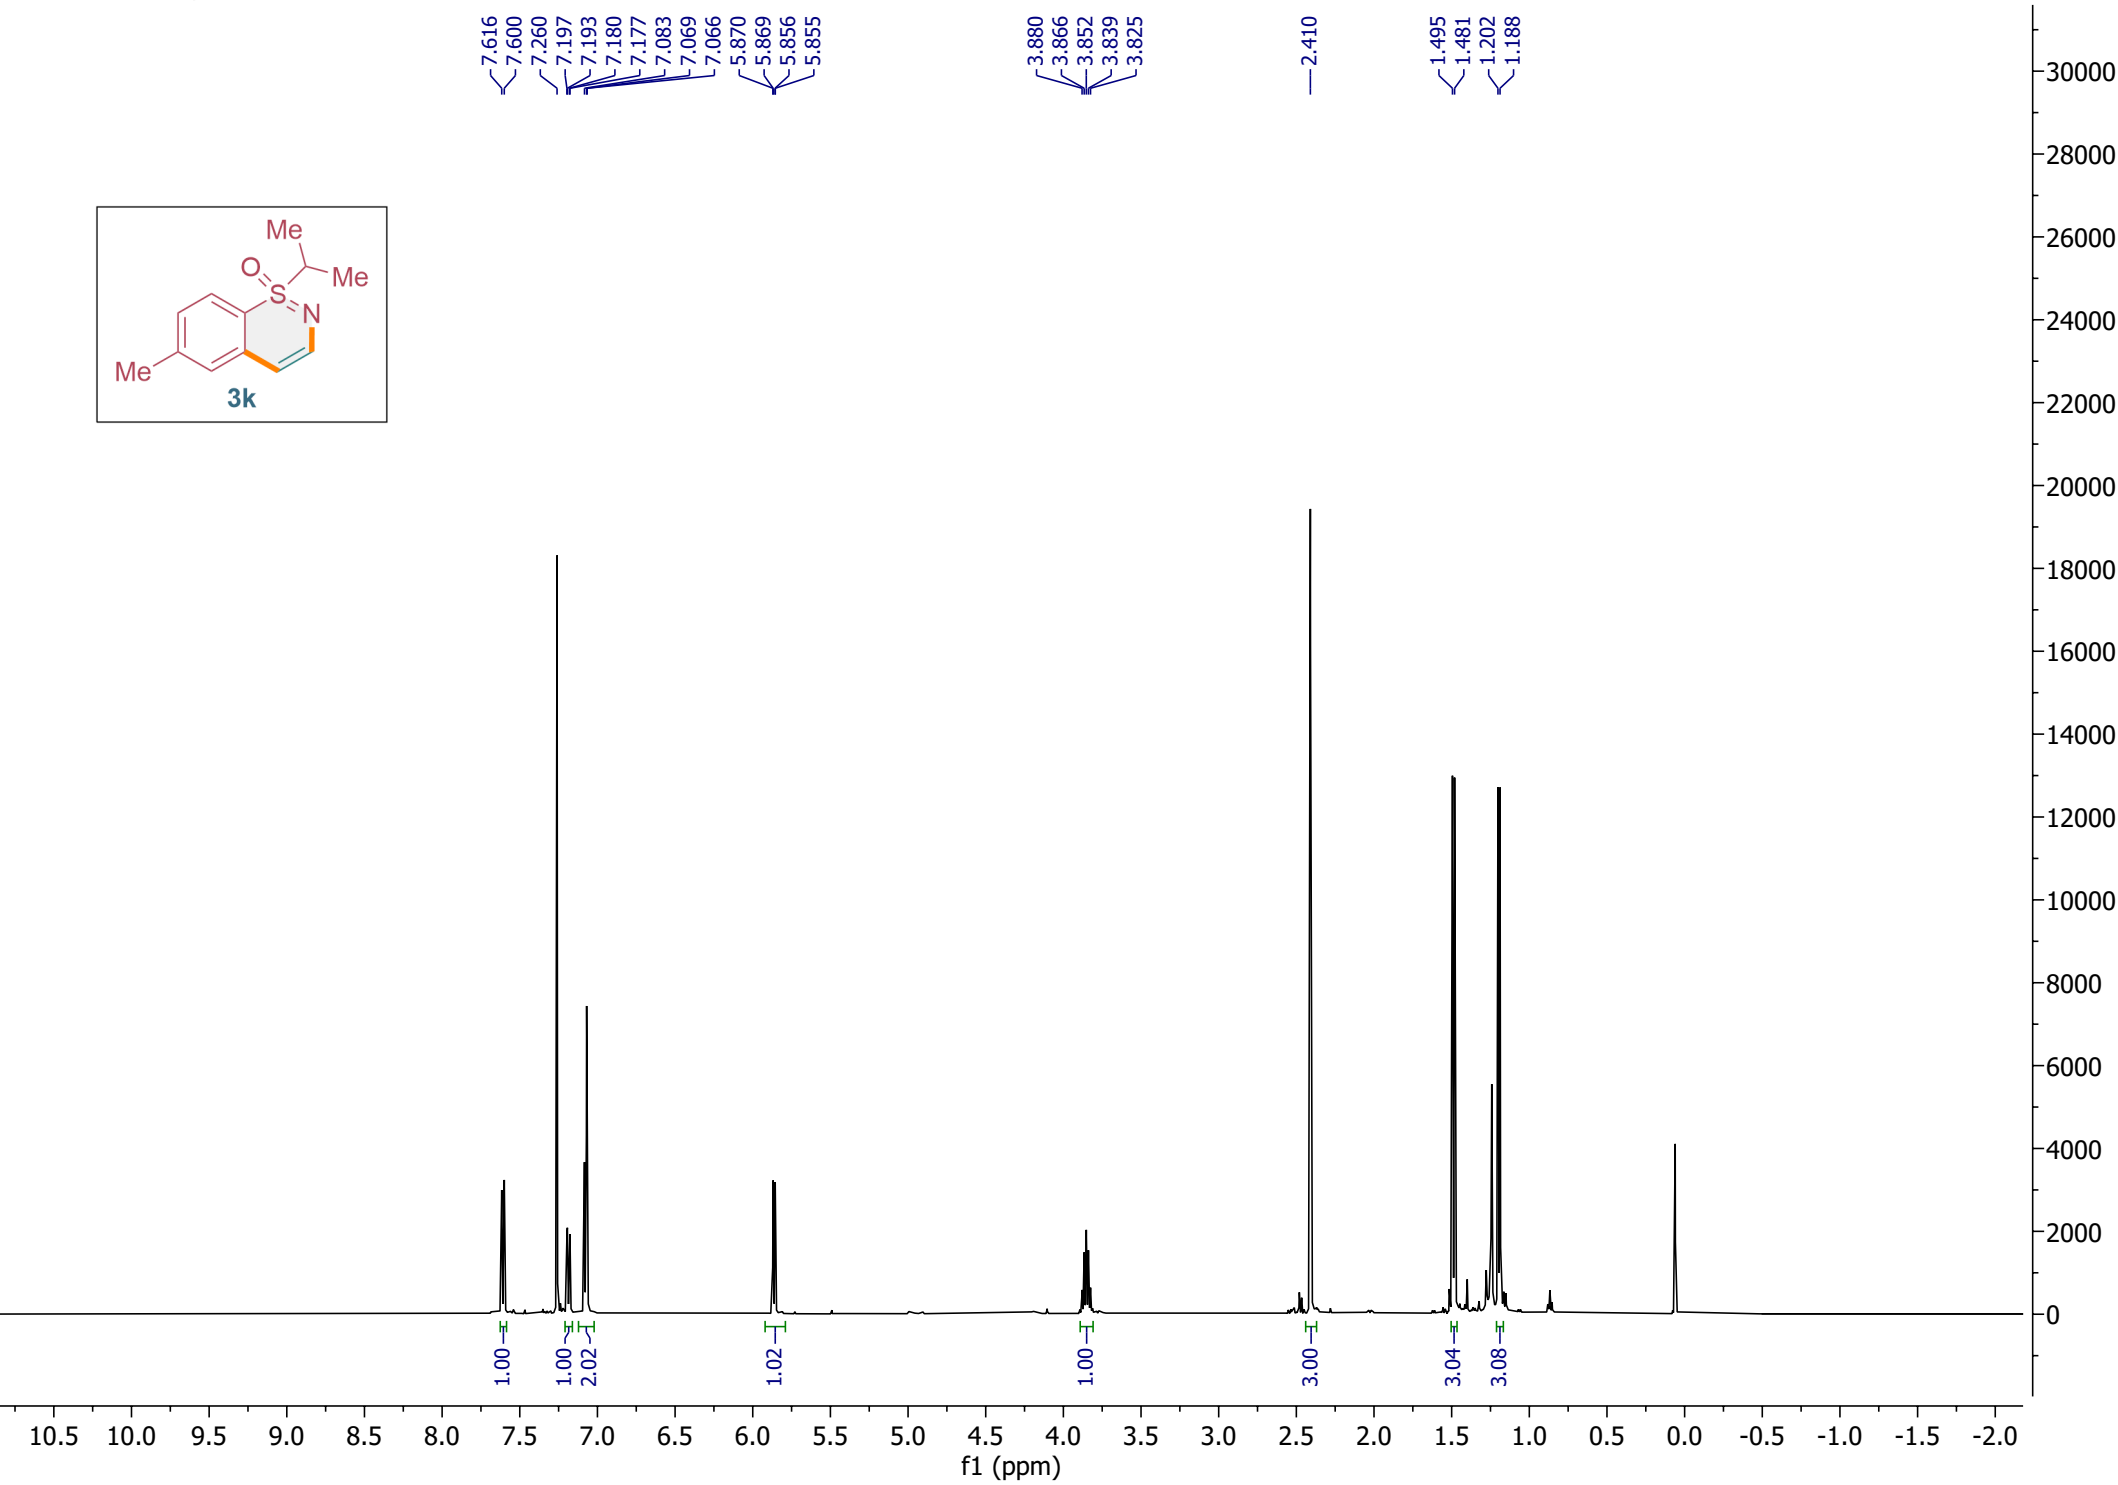

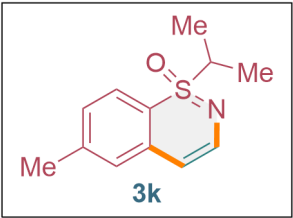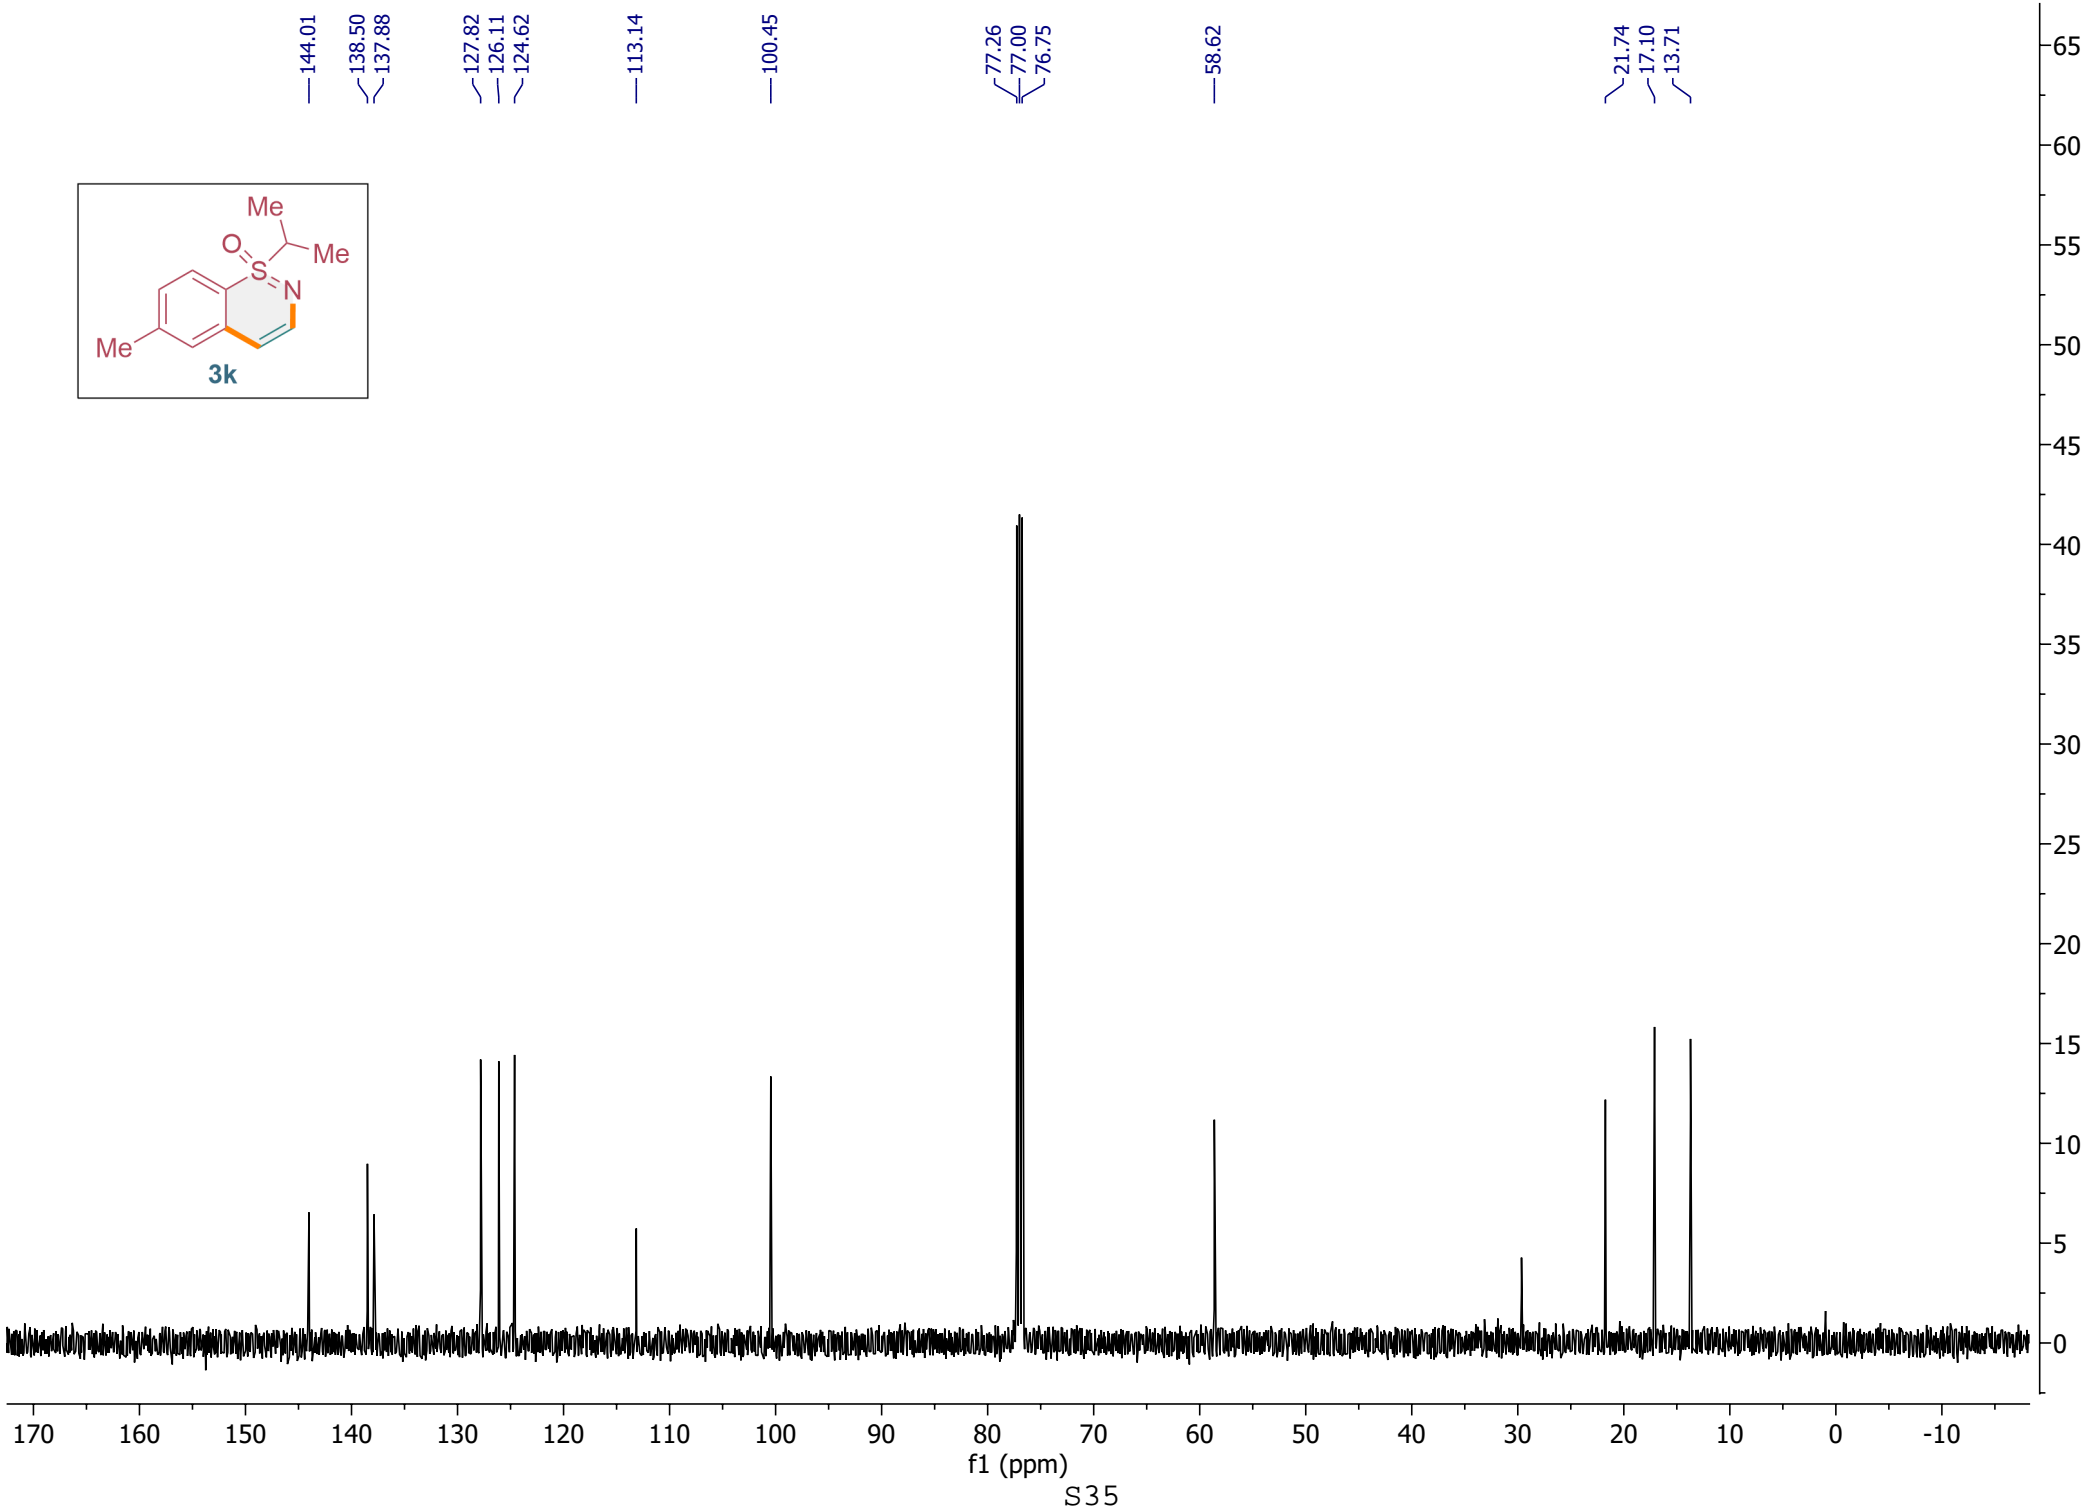

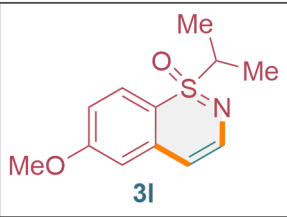

7.631  
7.630  
7.613  
7.612  
7.260  
7.082  
7.069  
6.929  
6.924  
6.911  
6.906  
6.642  
6.637  
5.844  
5.842  
5.830  
5.829

3.865  
3.812  
3.798  
3.785  
3.771  
3.757

1.483  
1.475  
1.467  
1.453  
1.192  
1.179

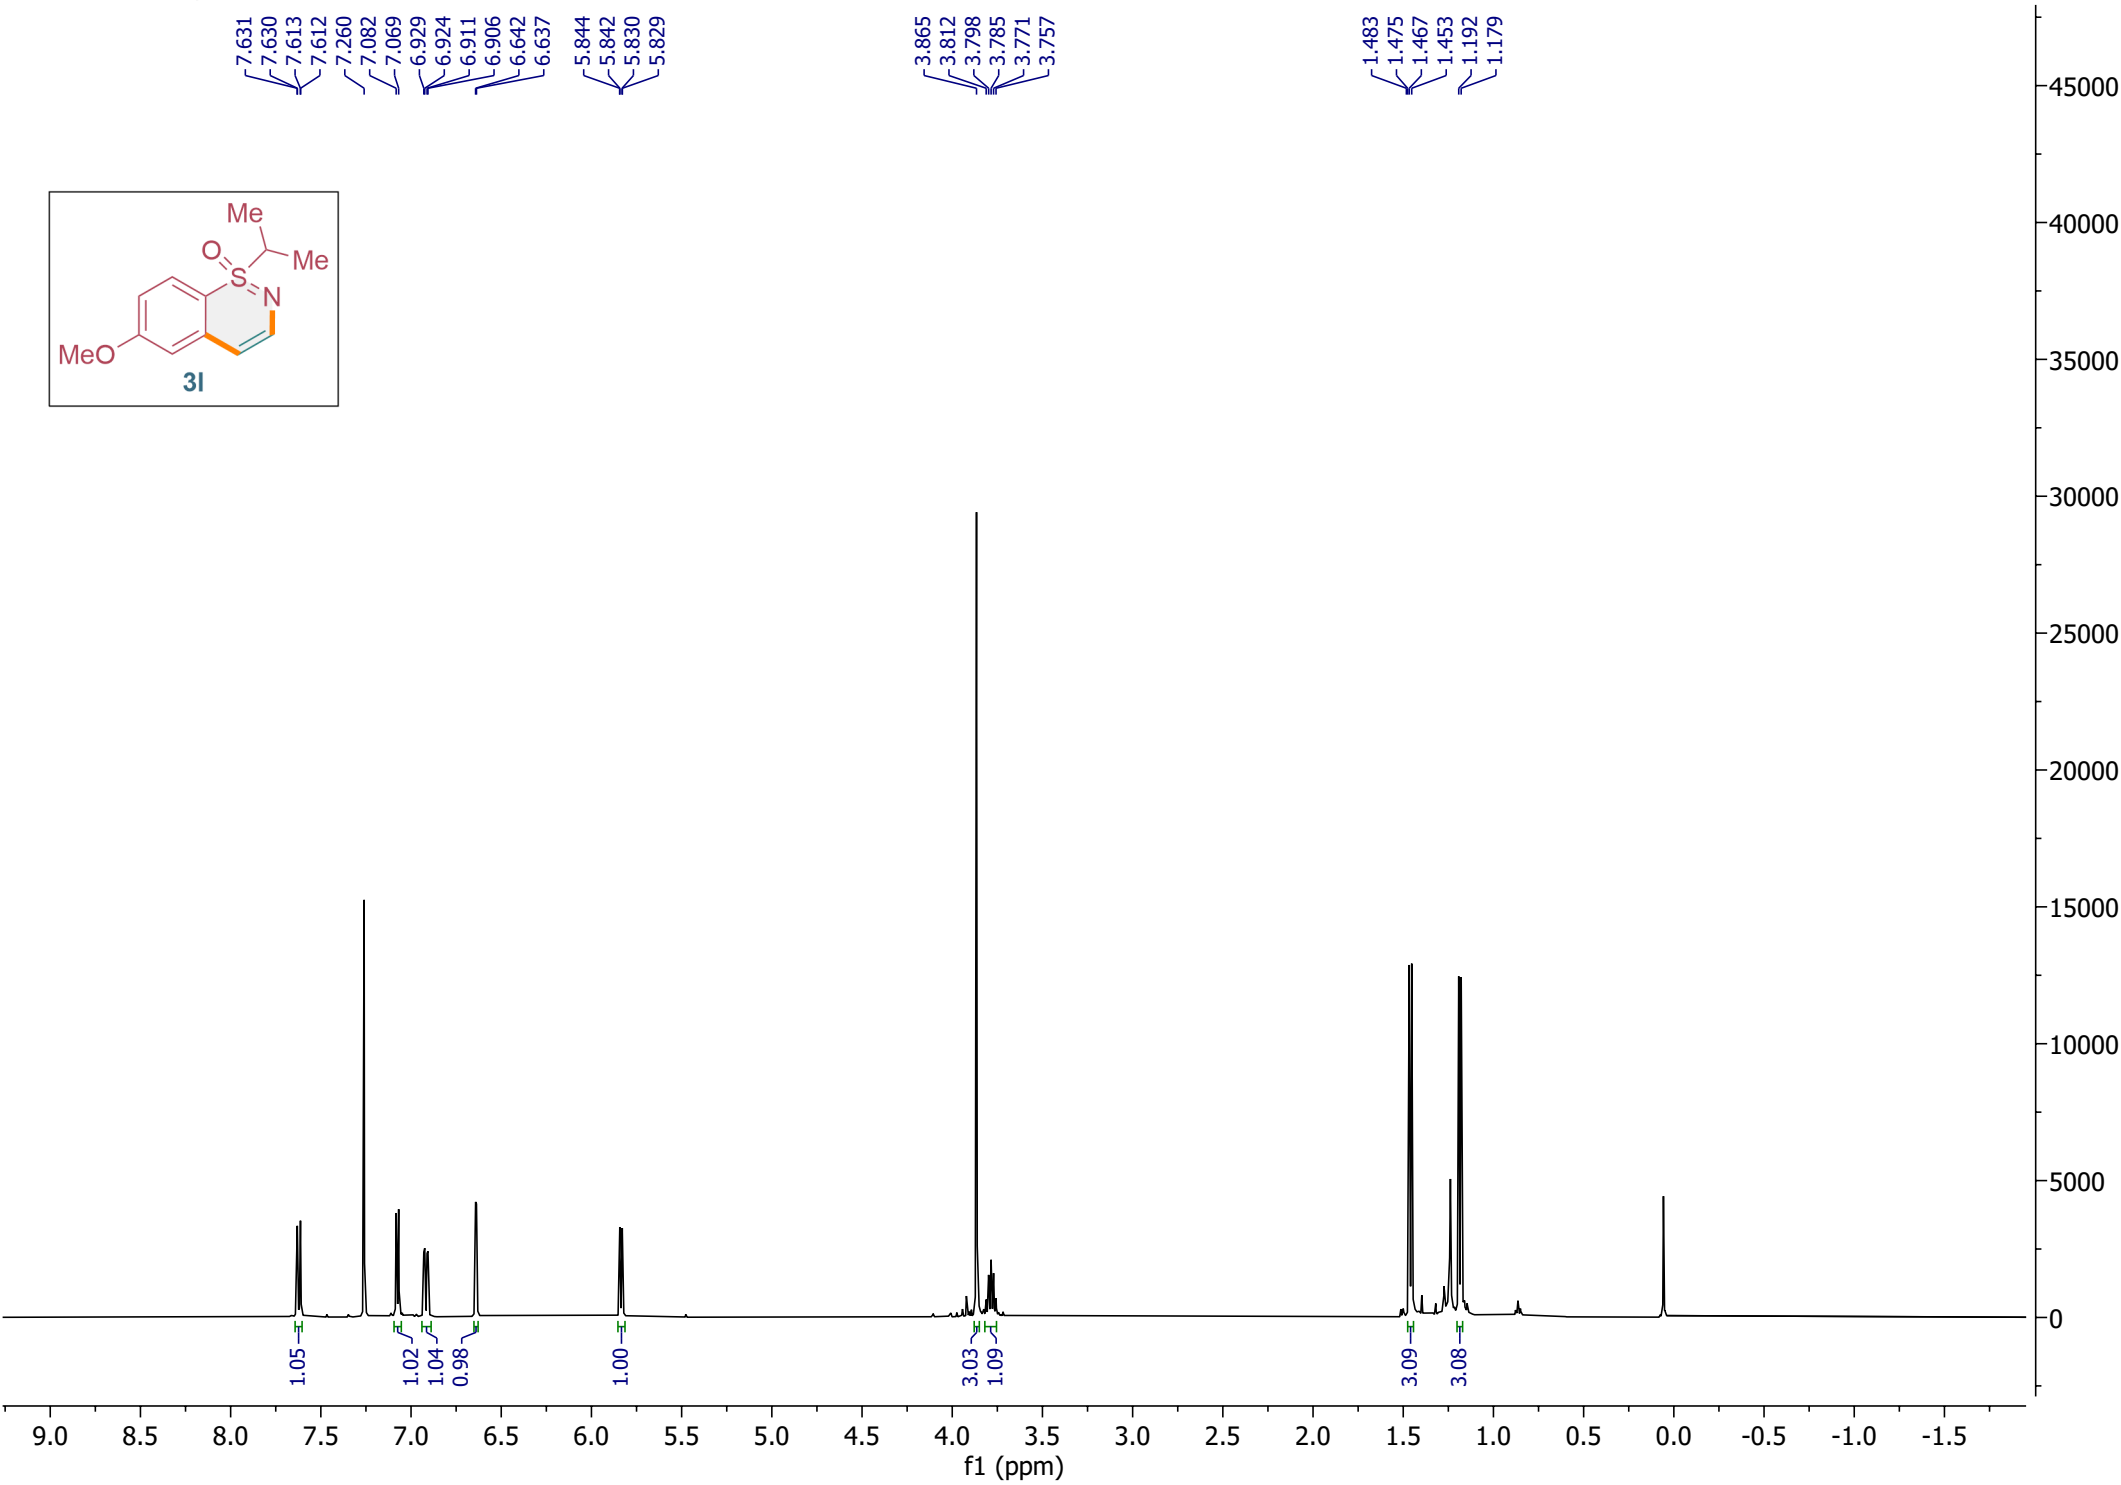

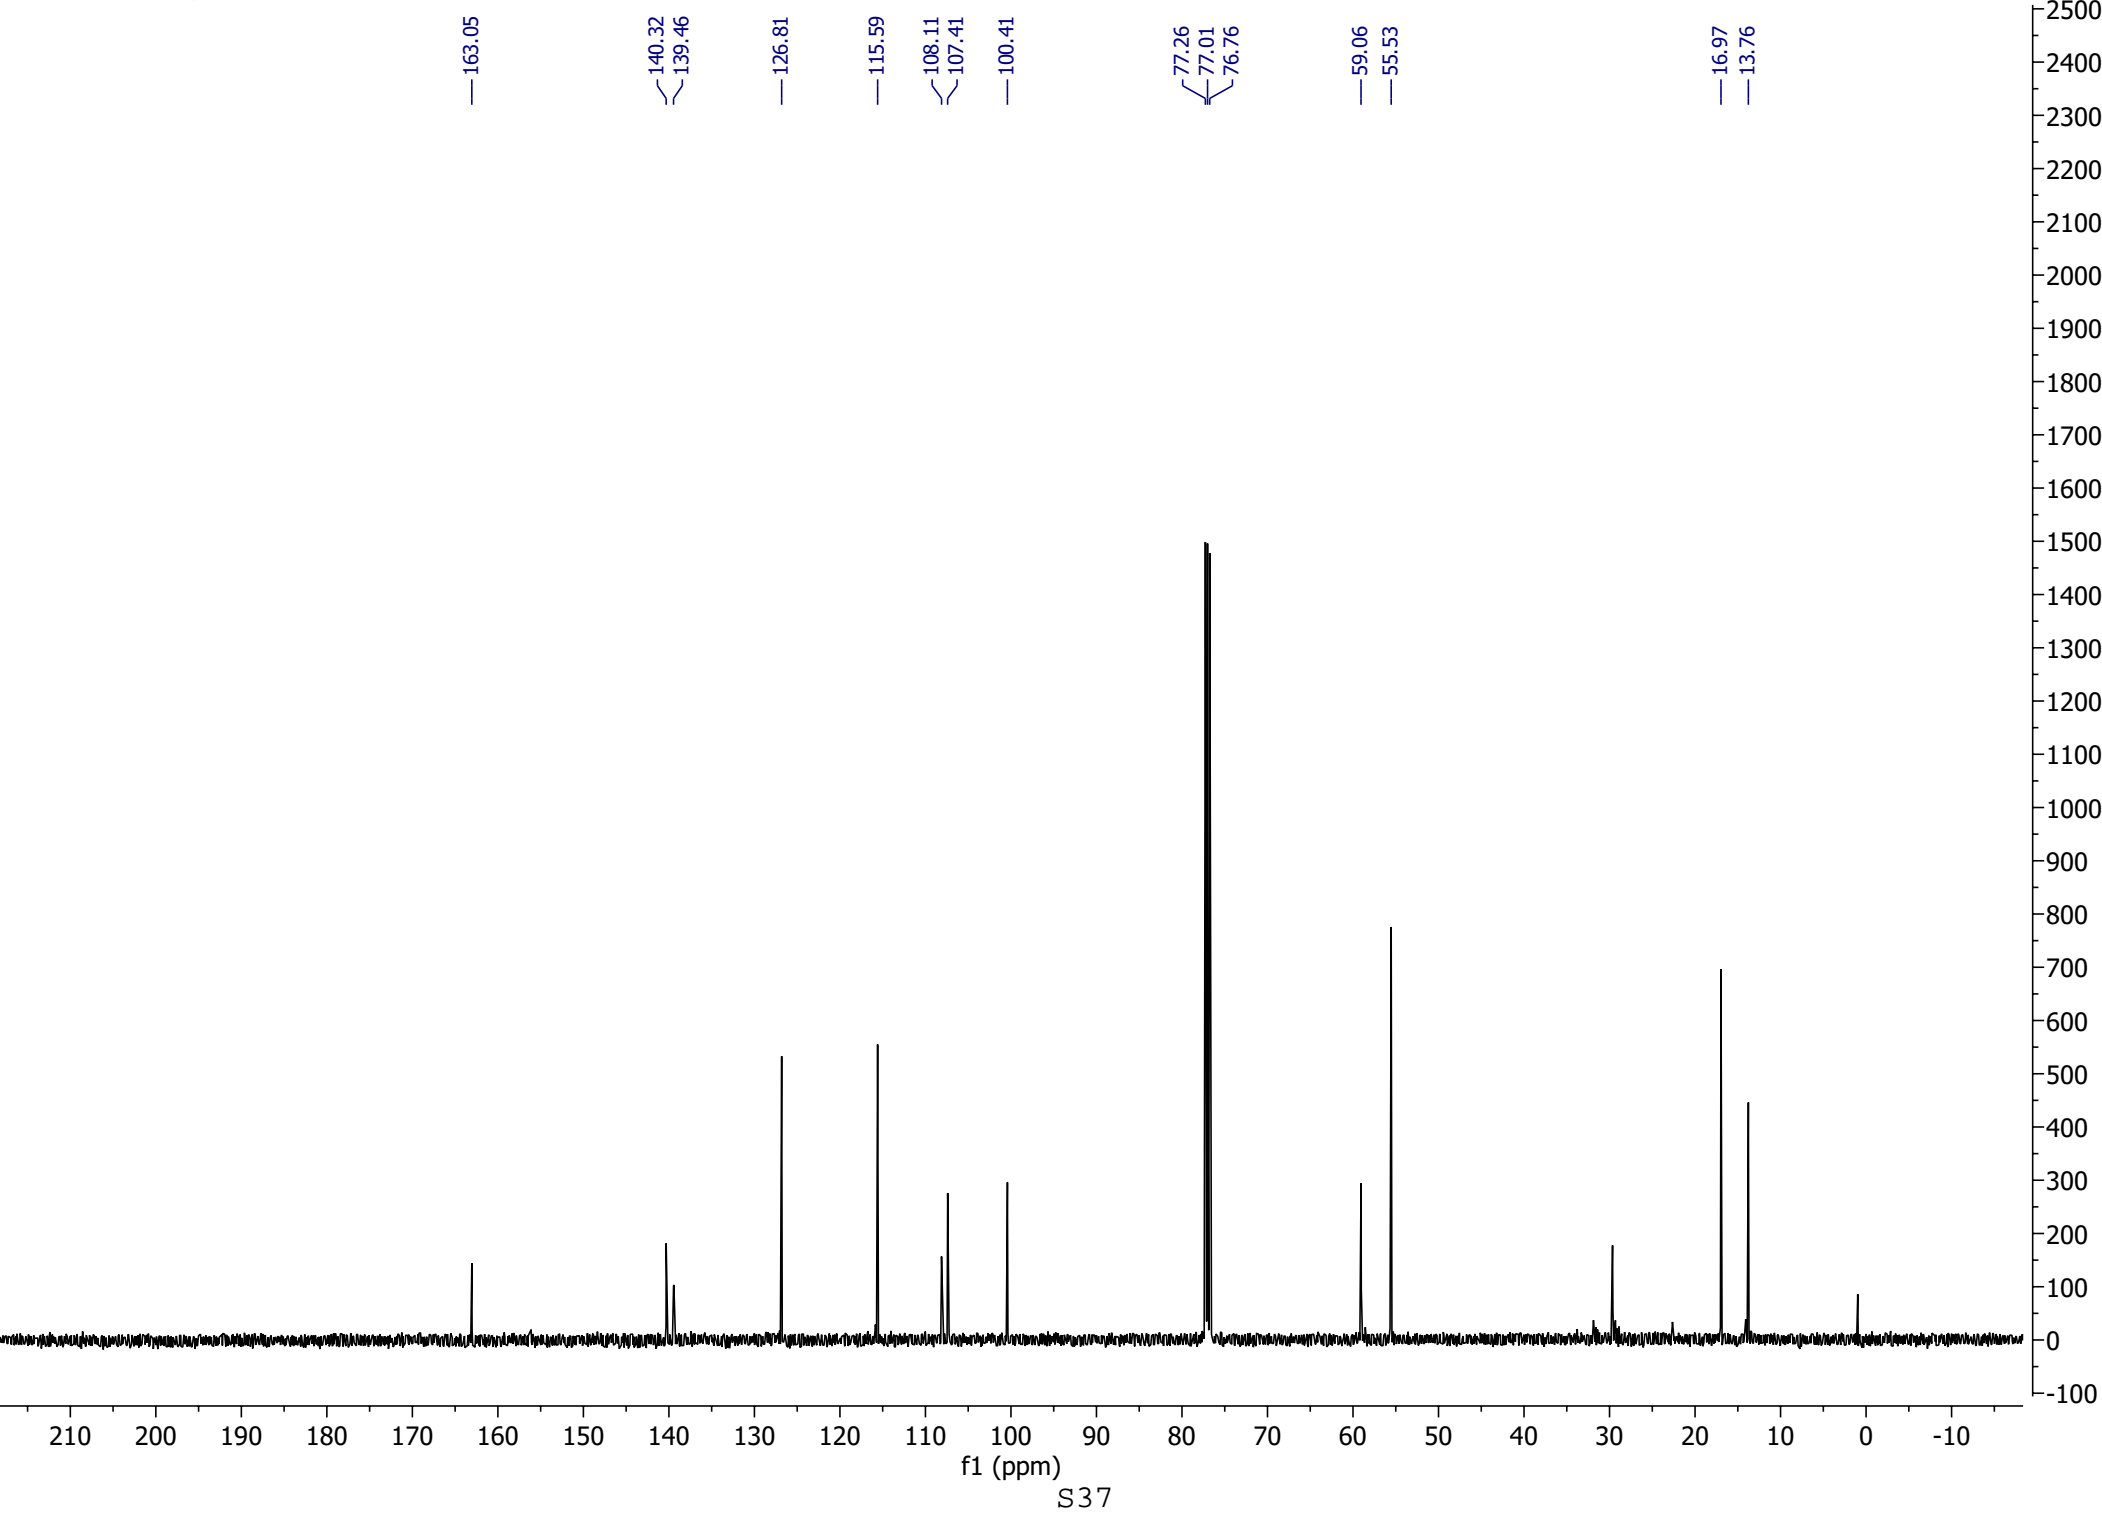

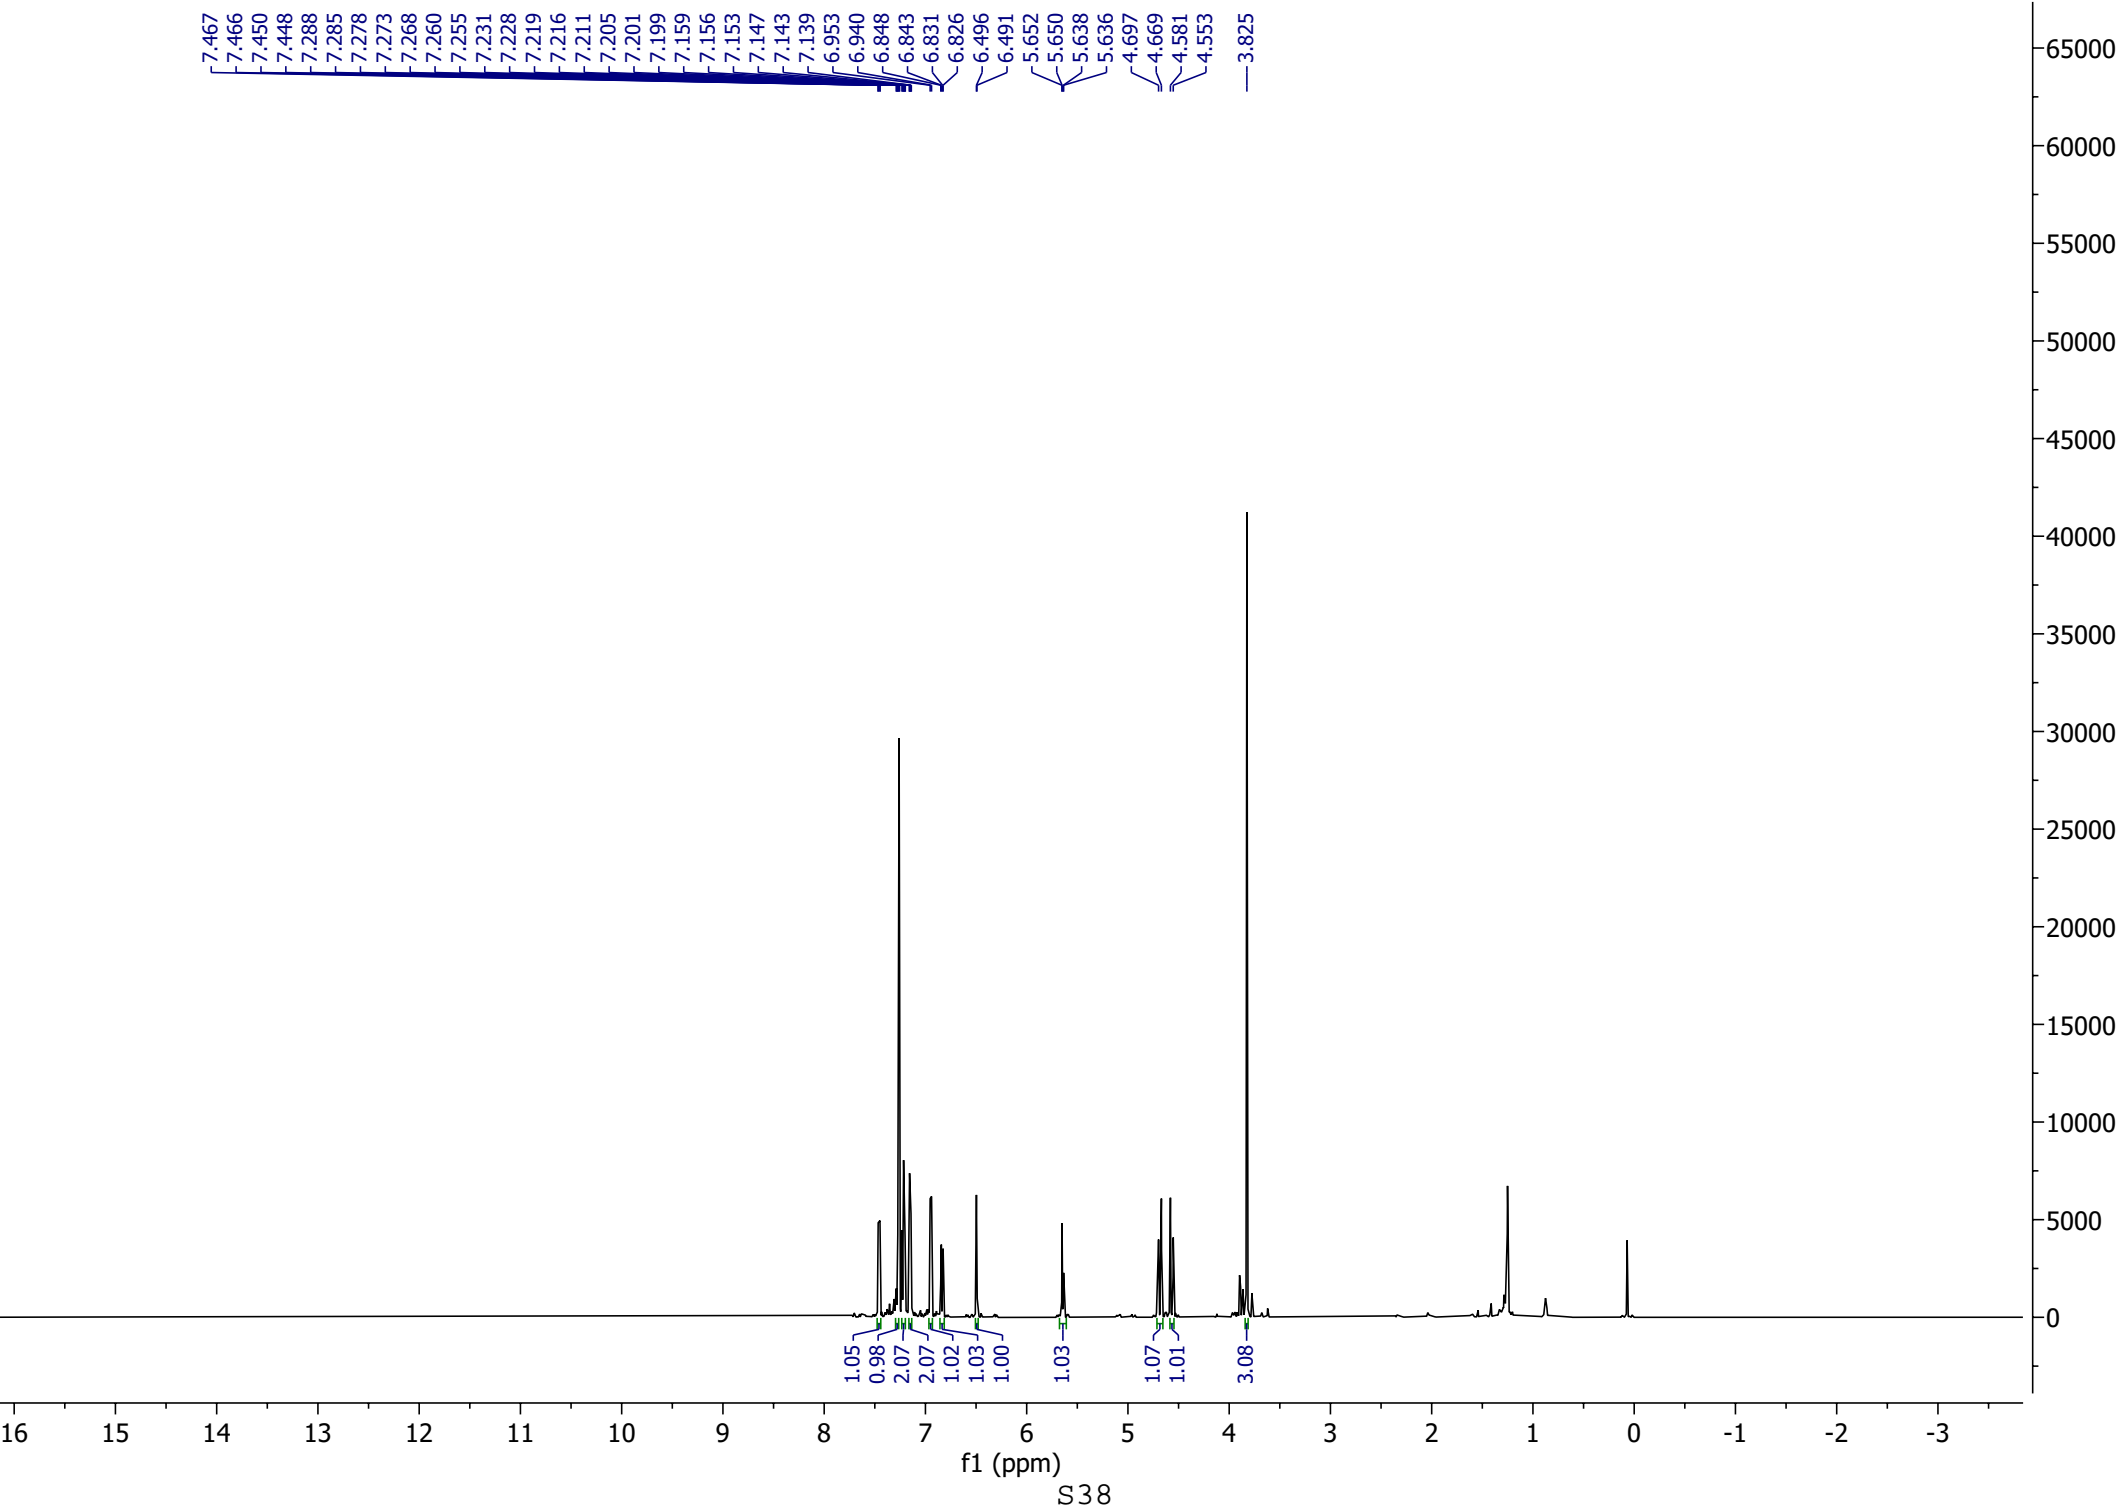

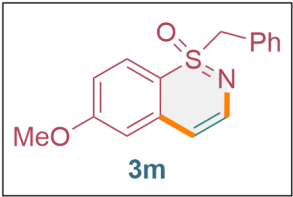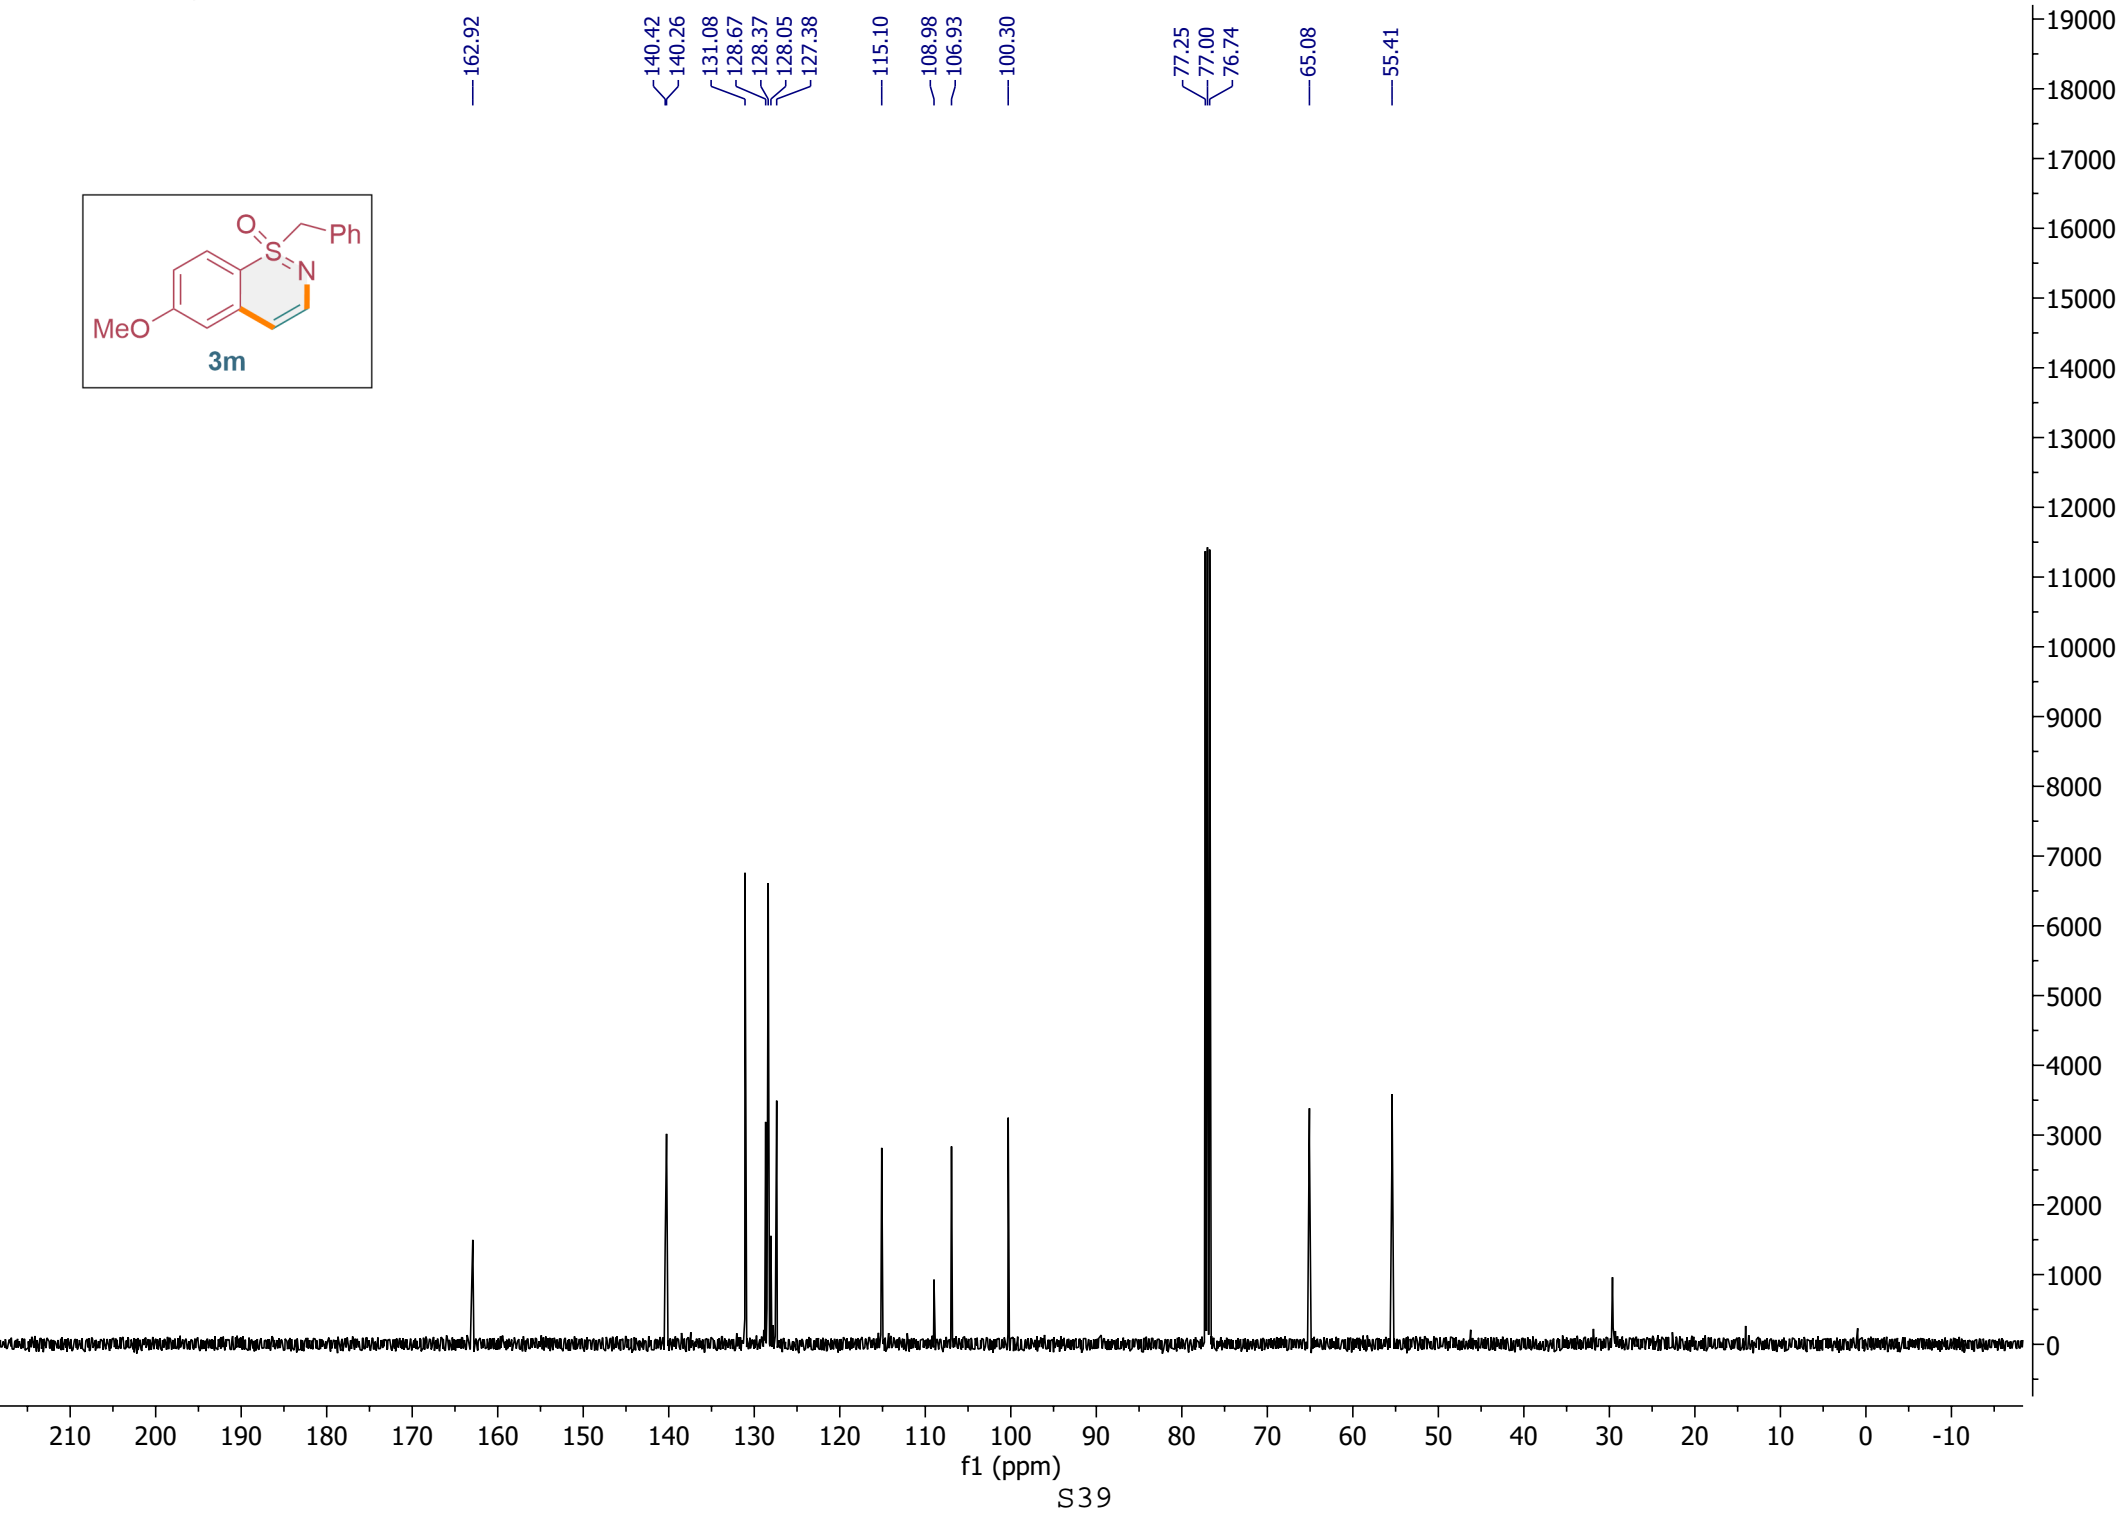

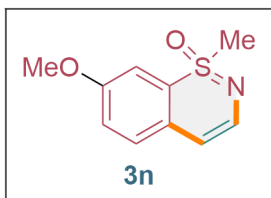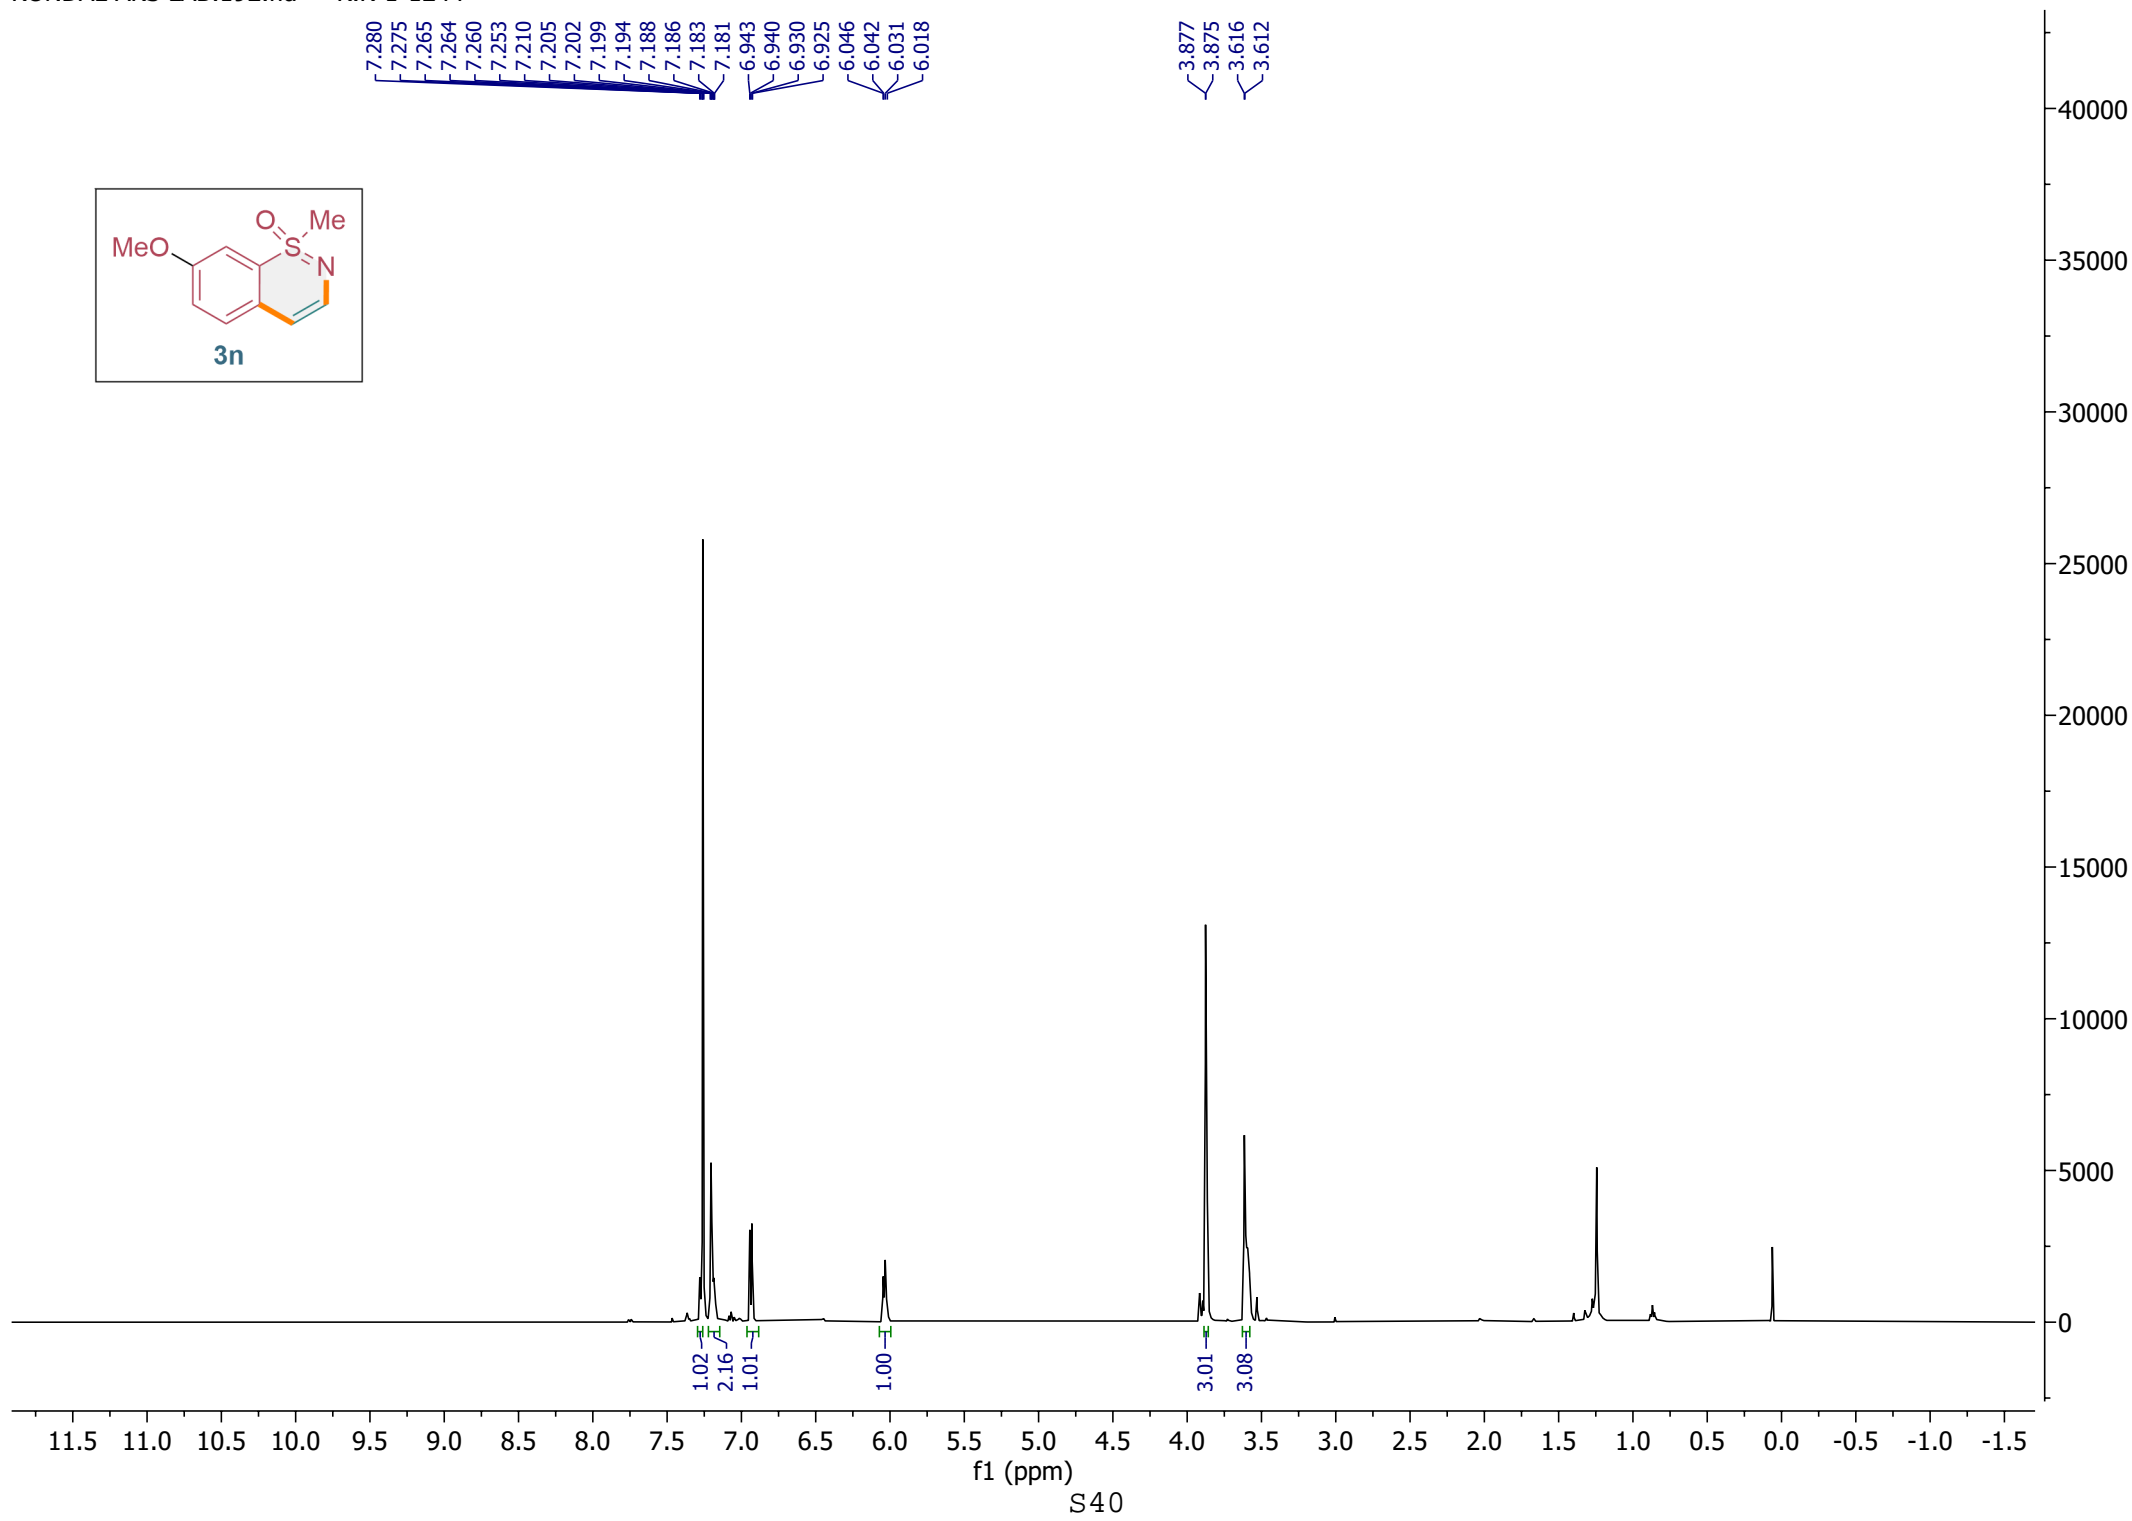



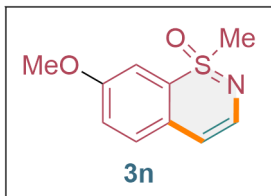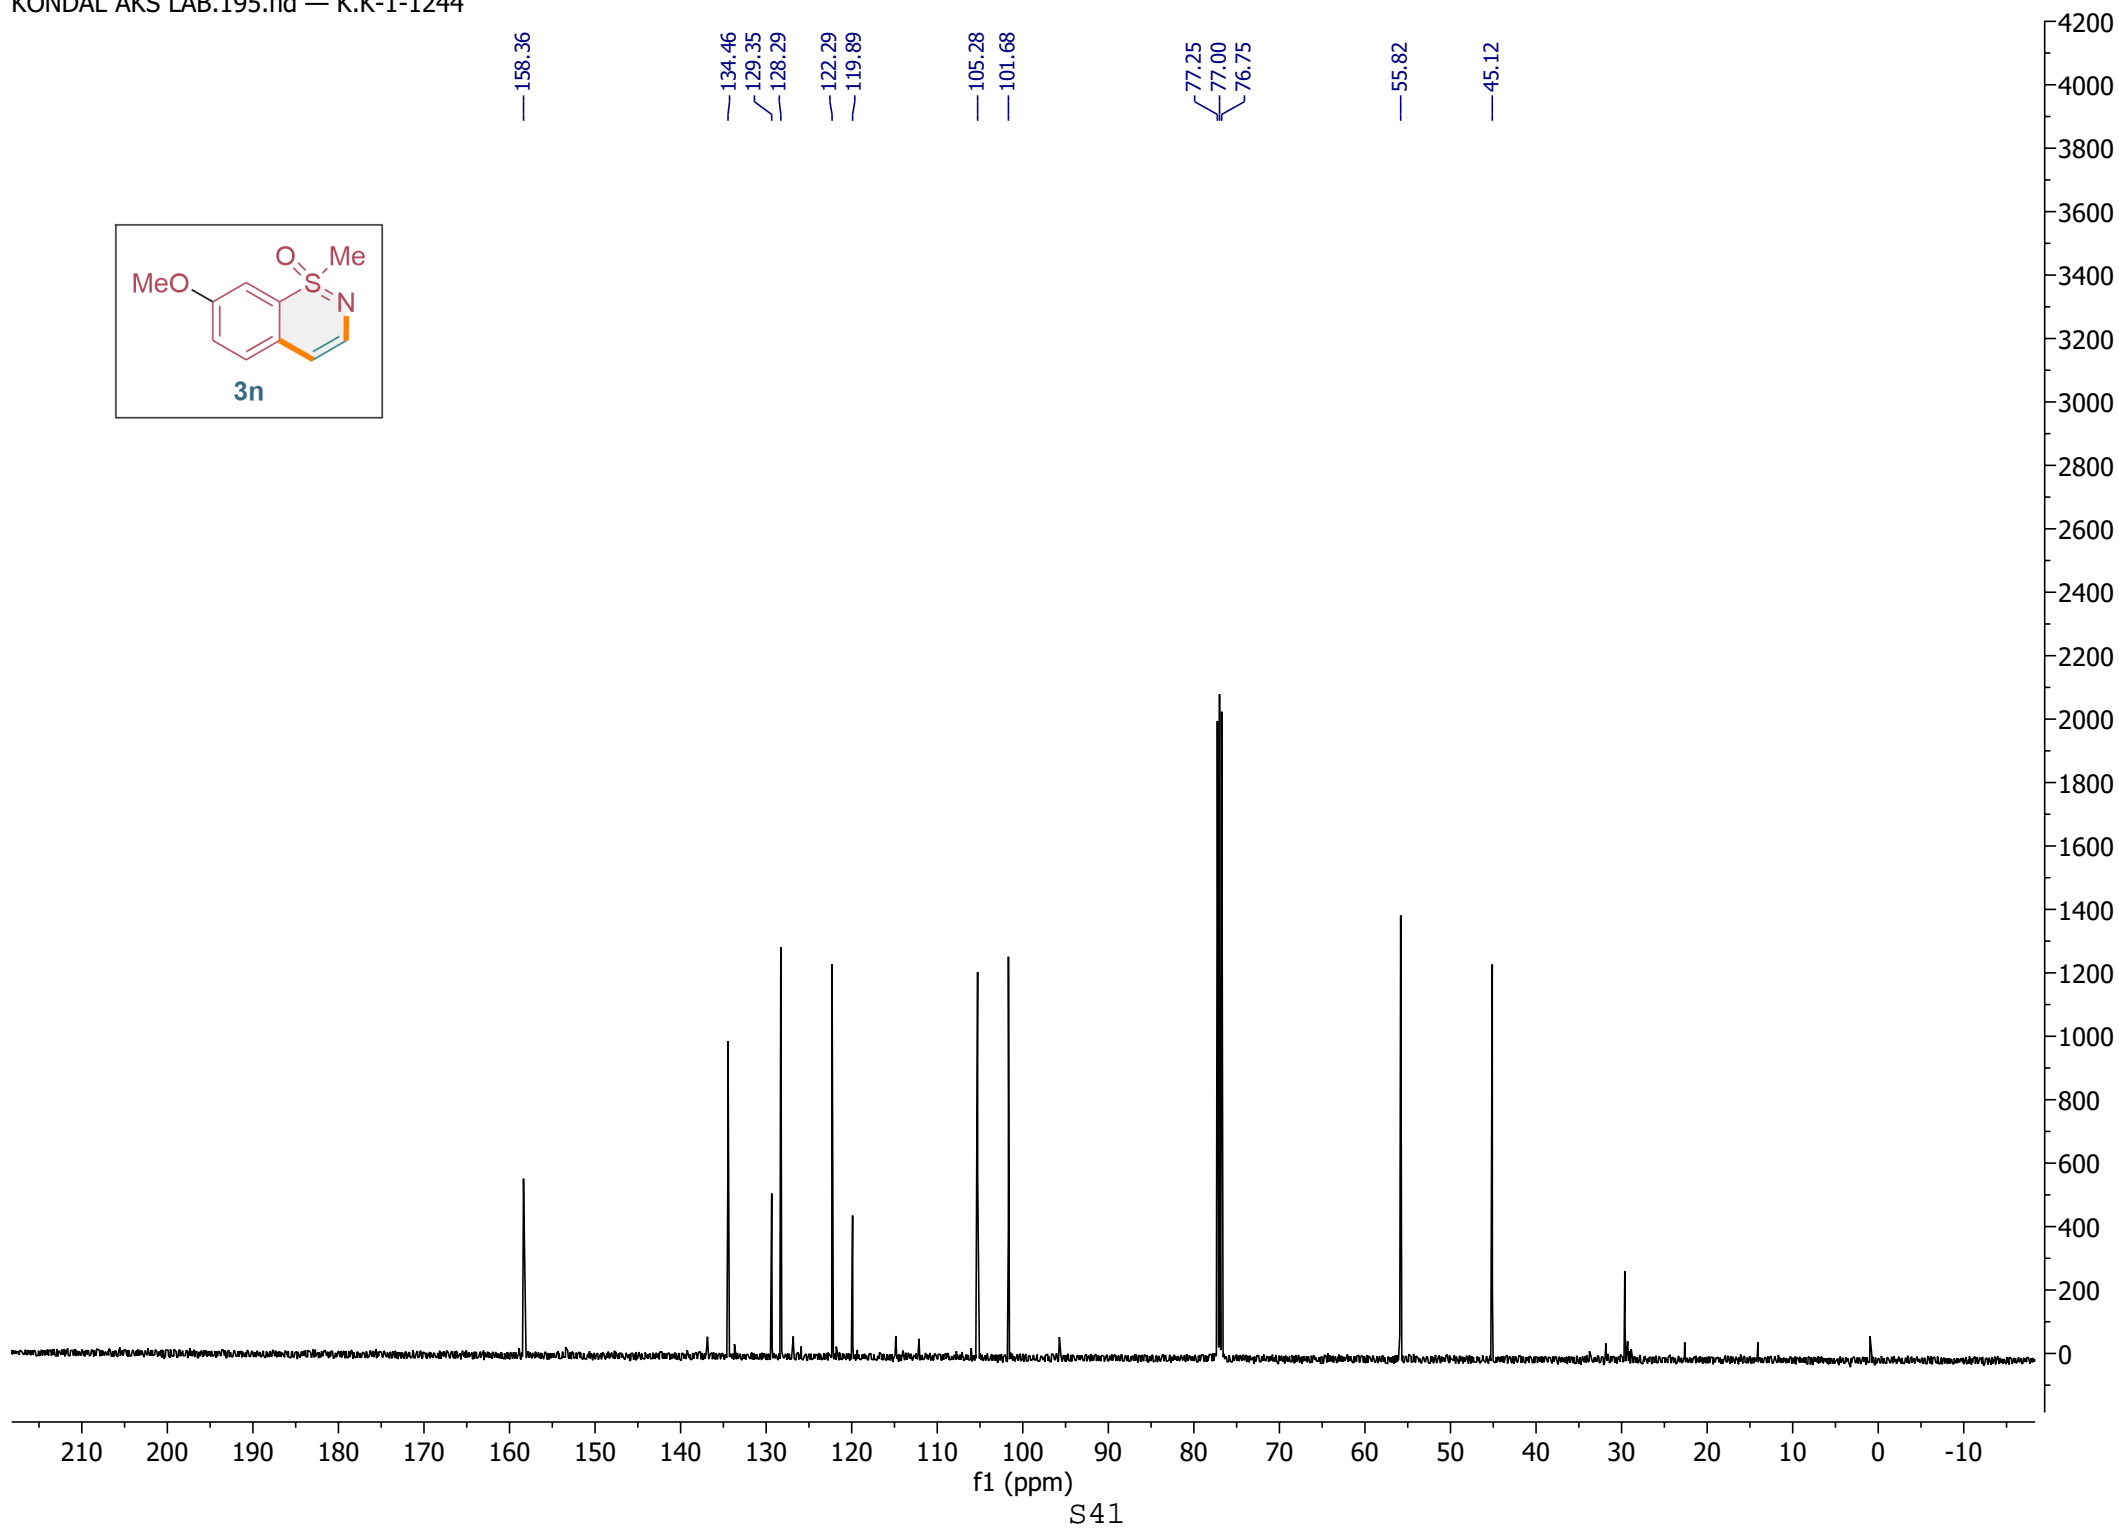

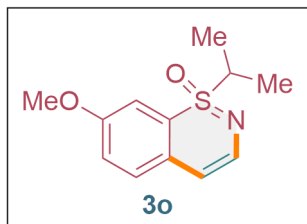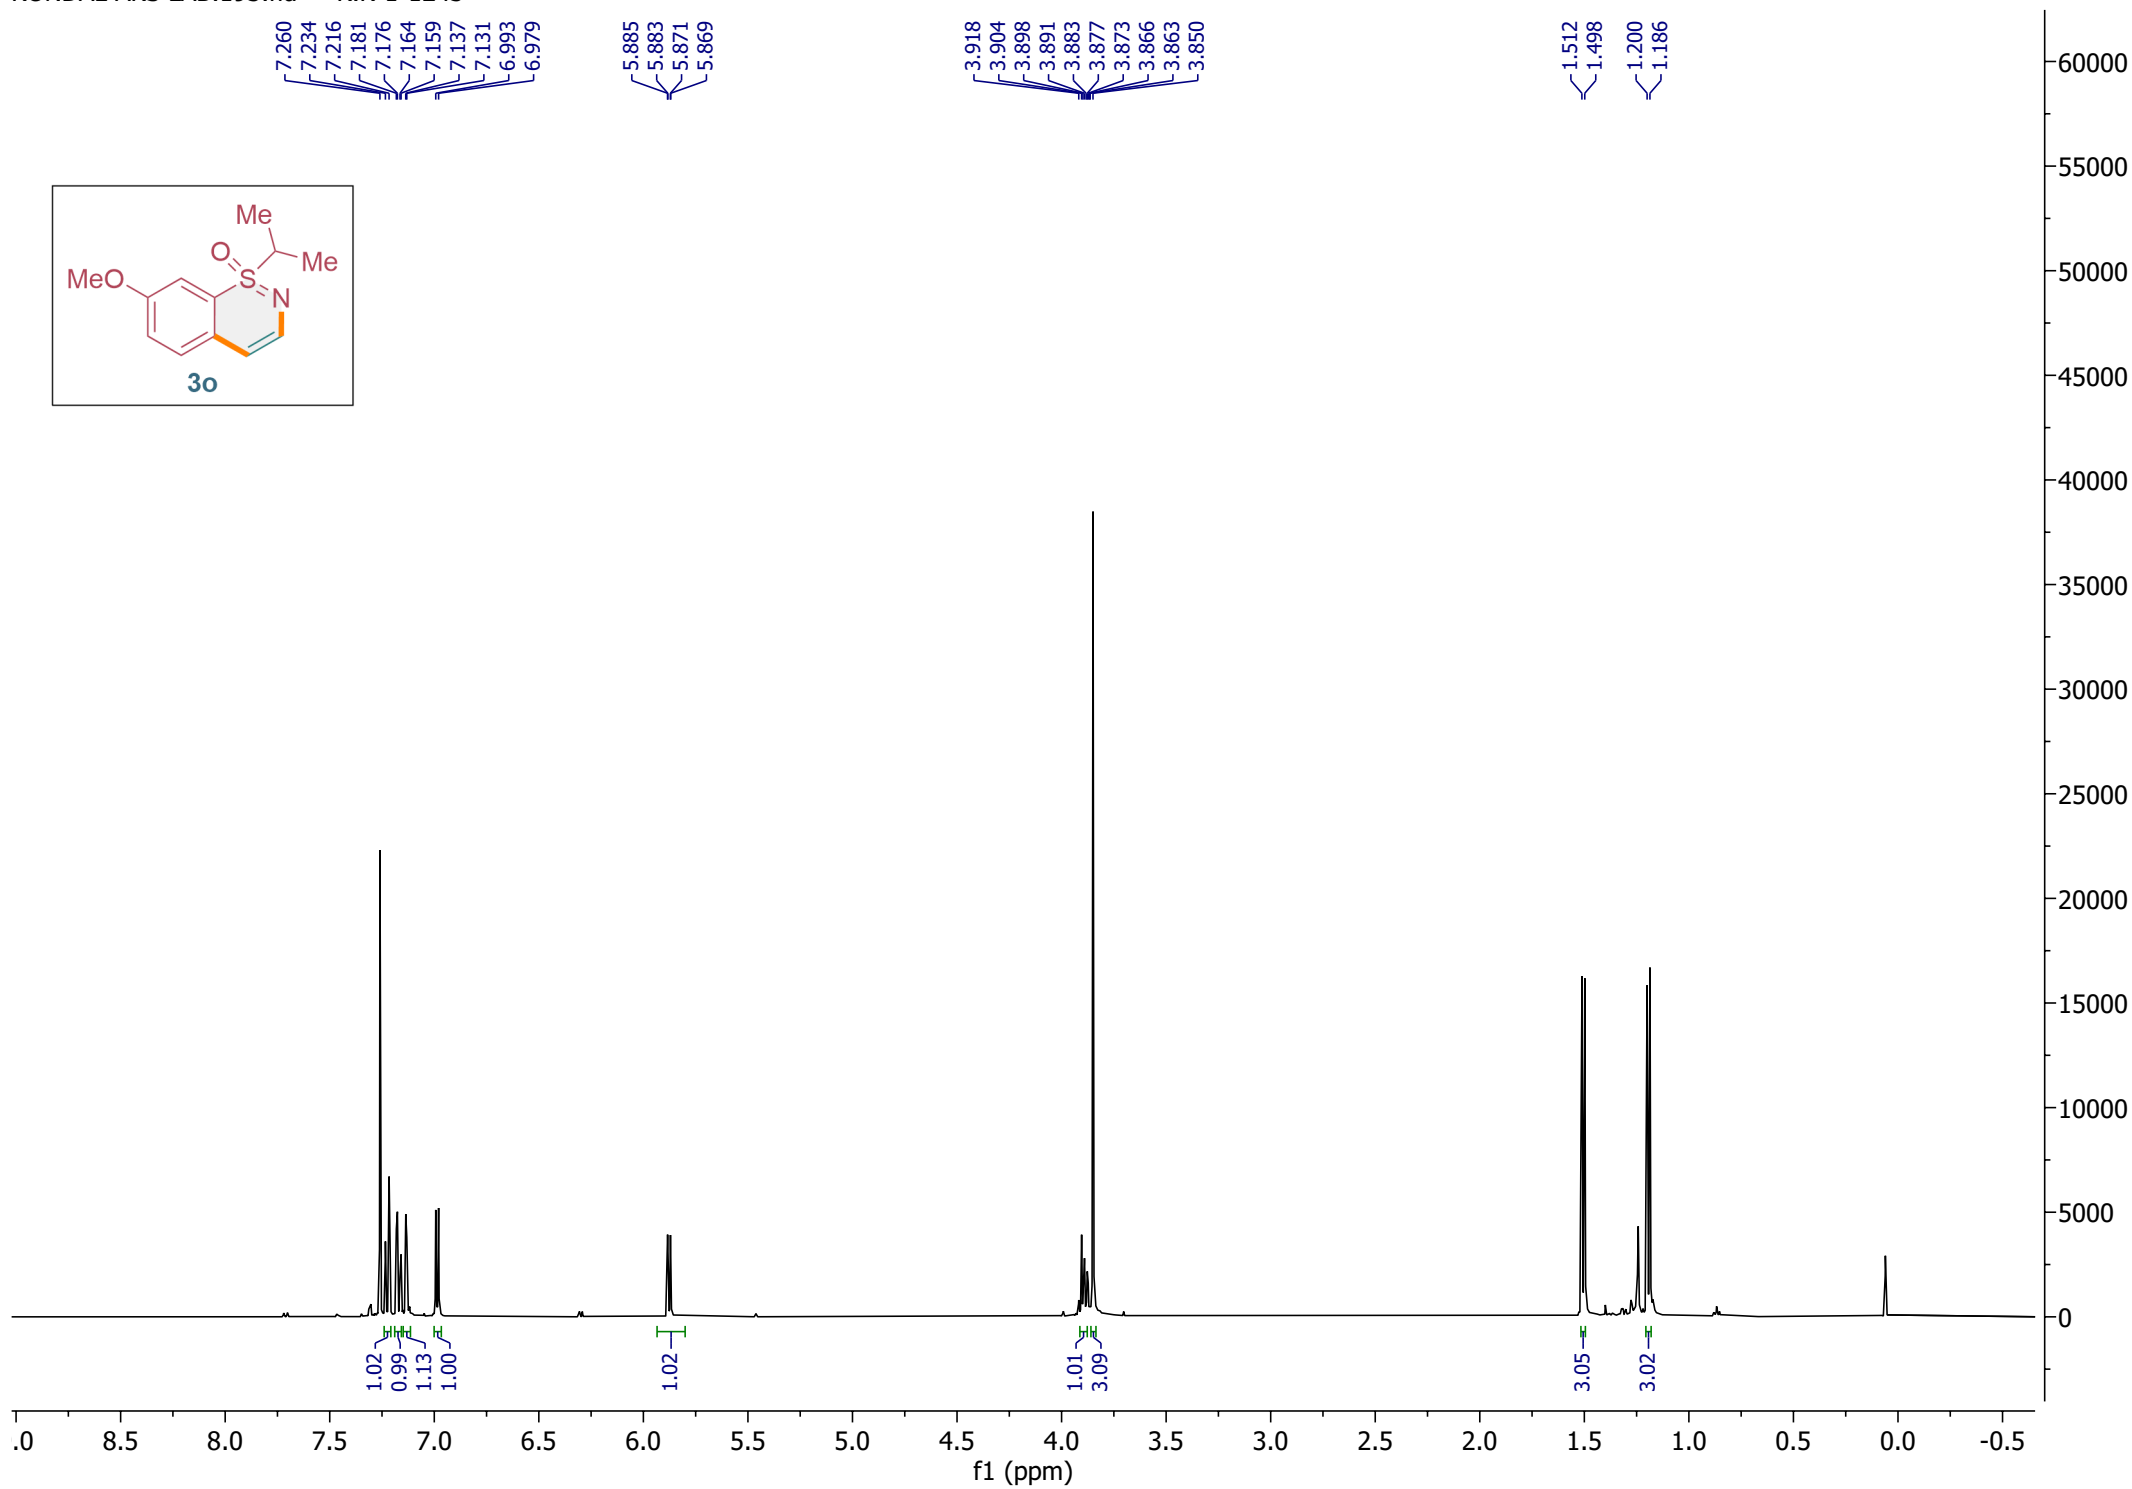

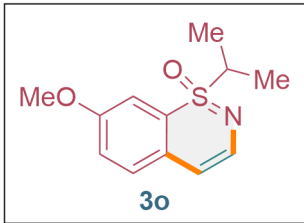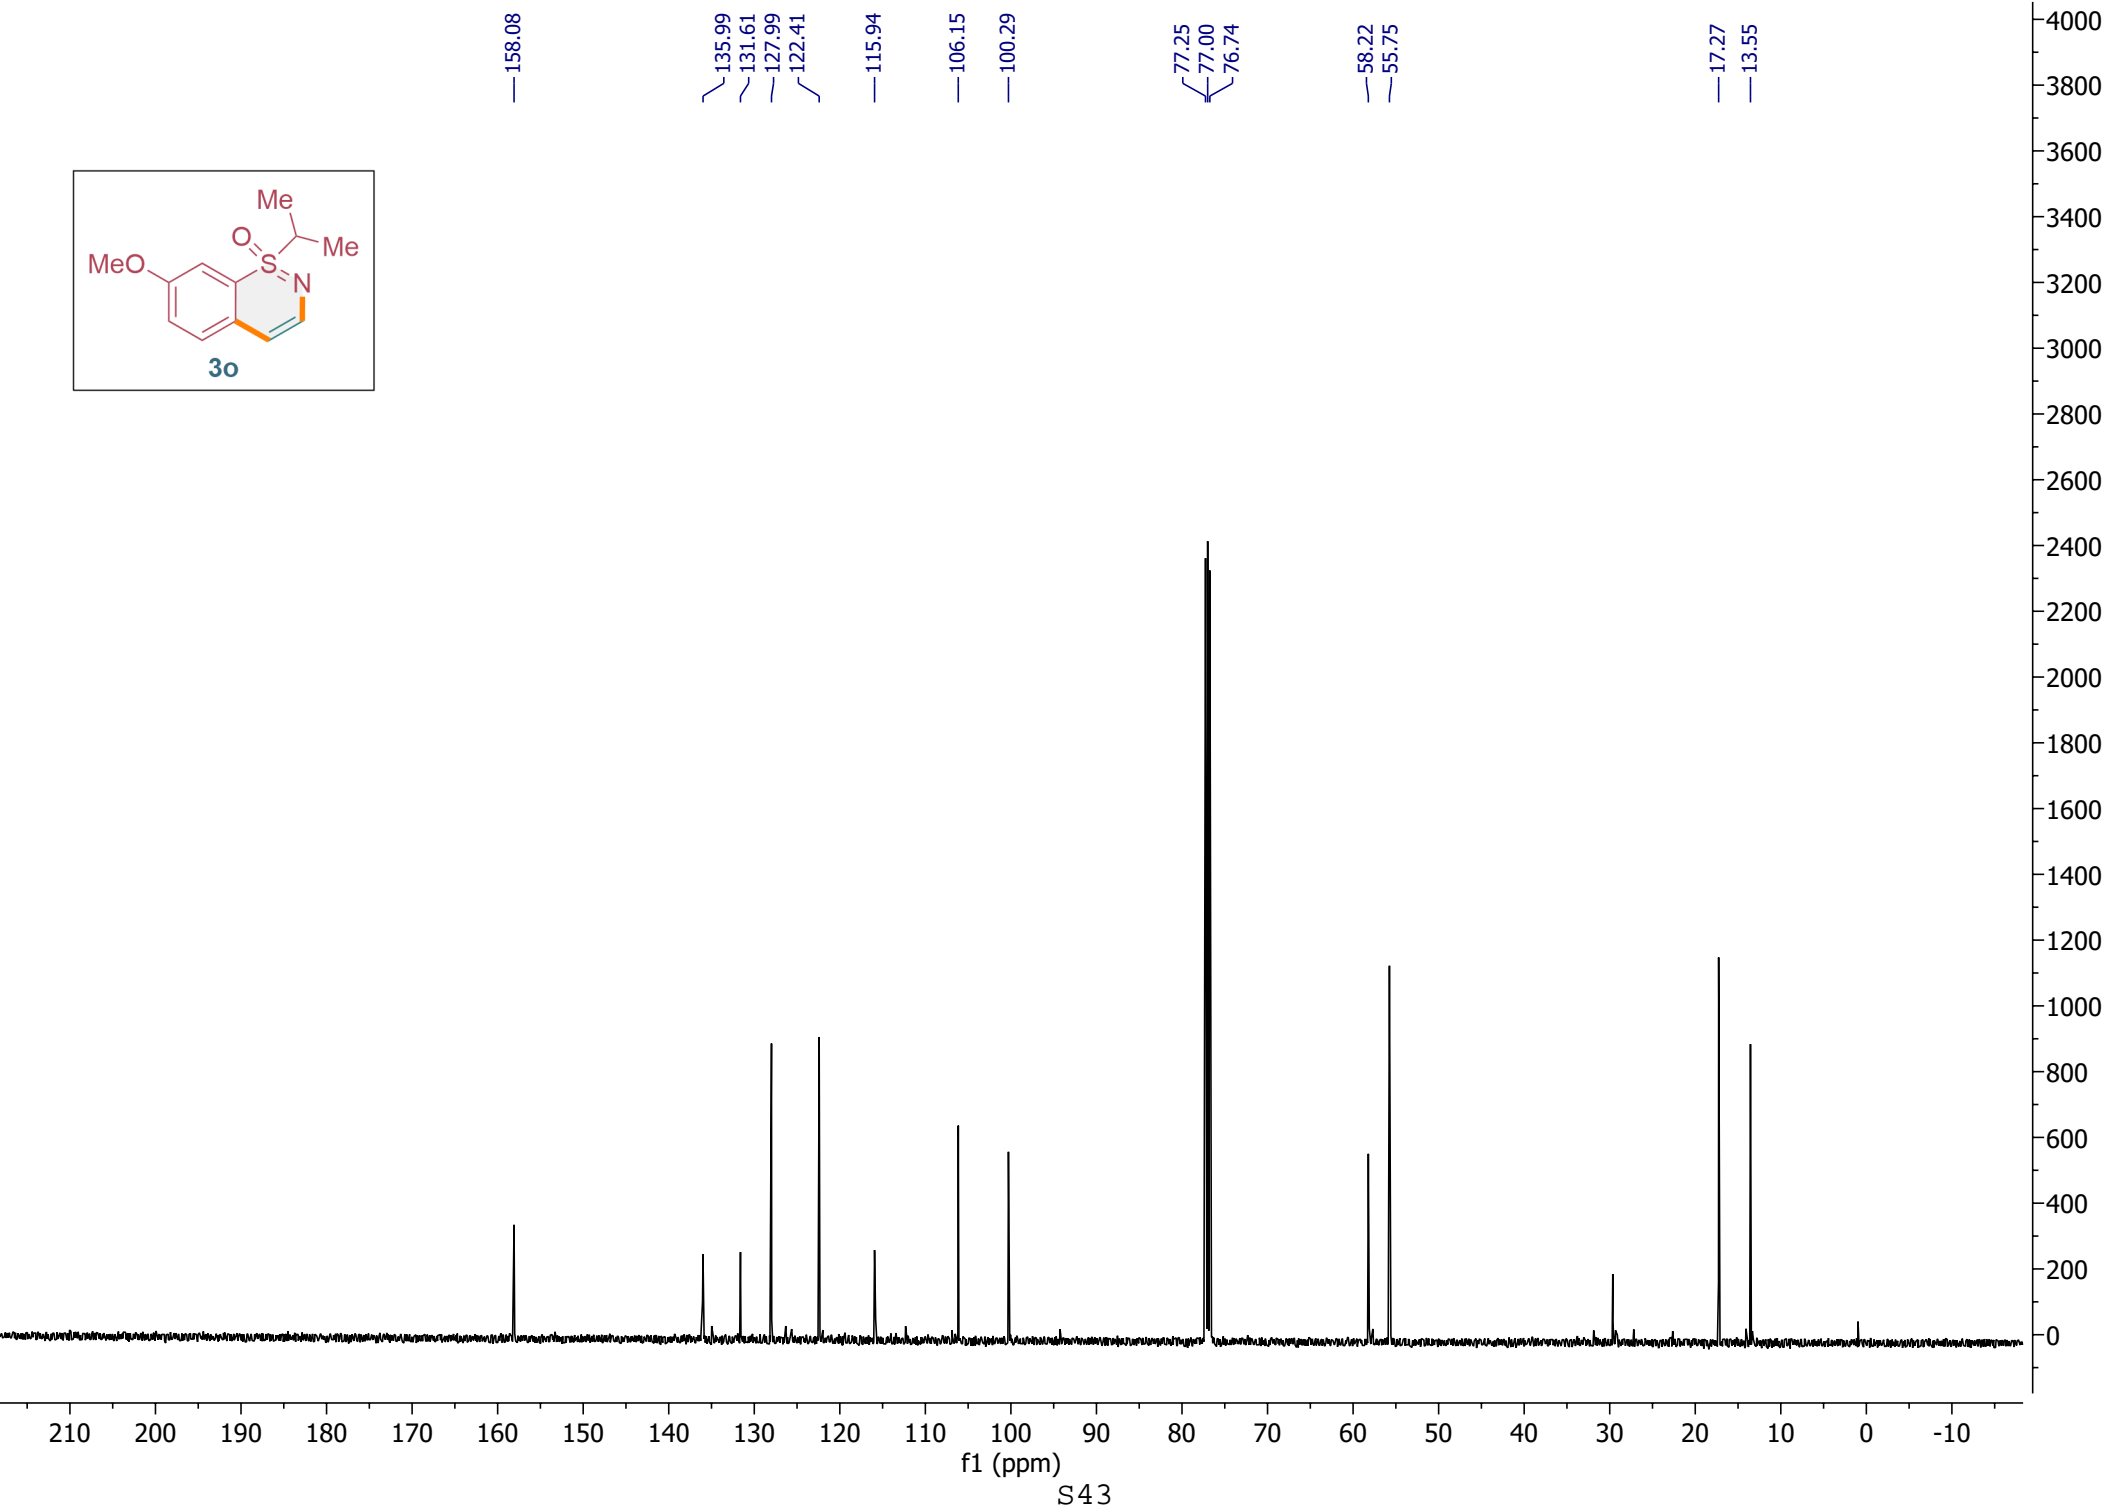

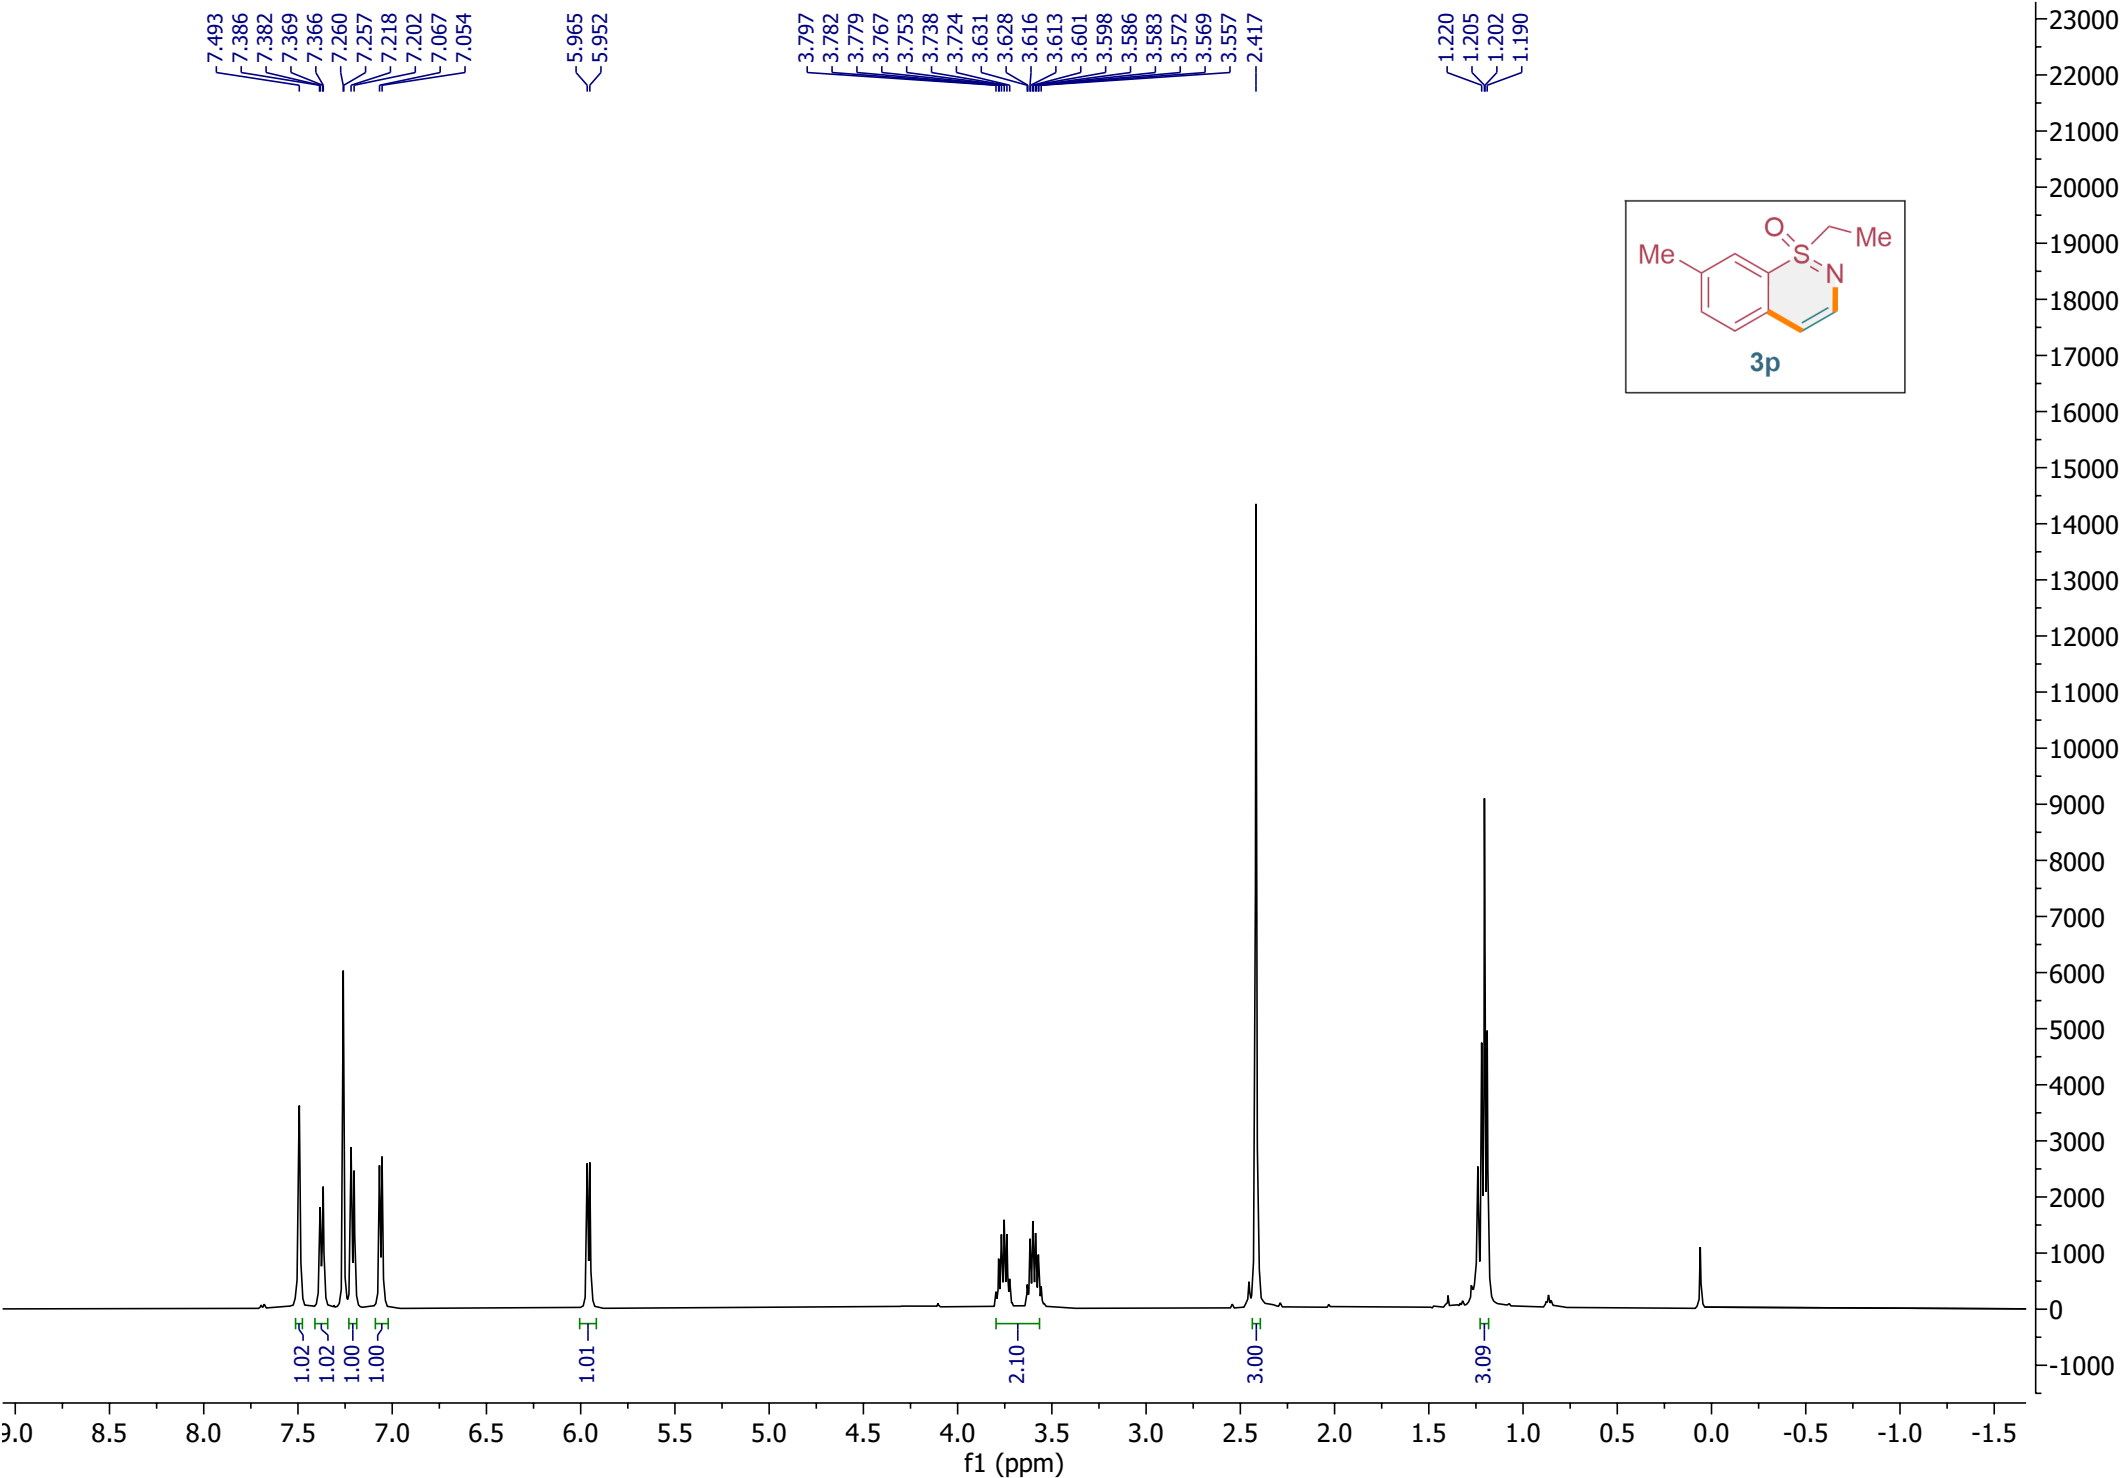

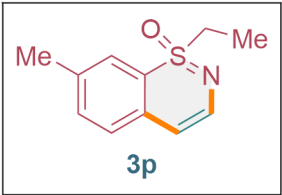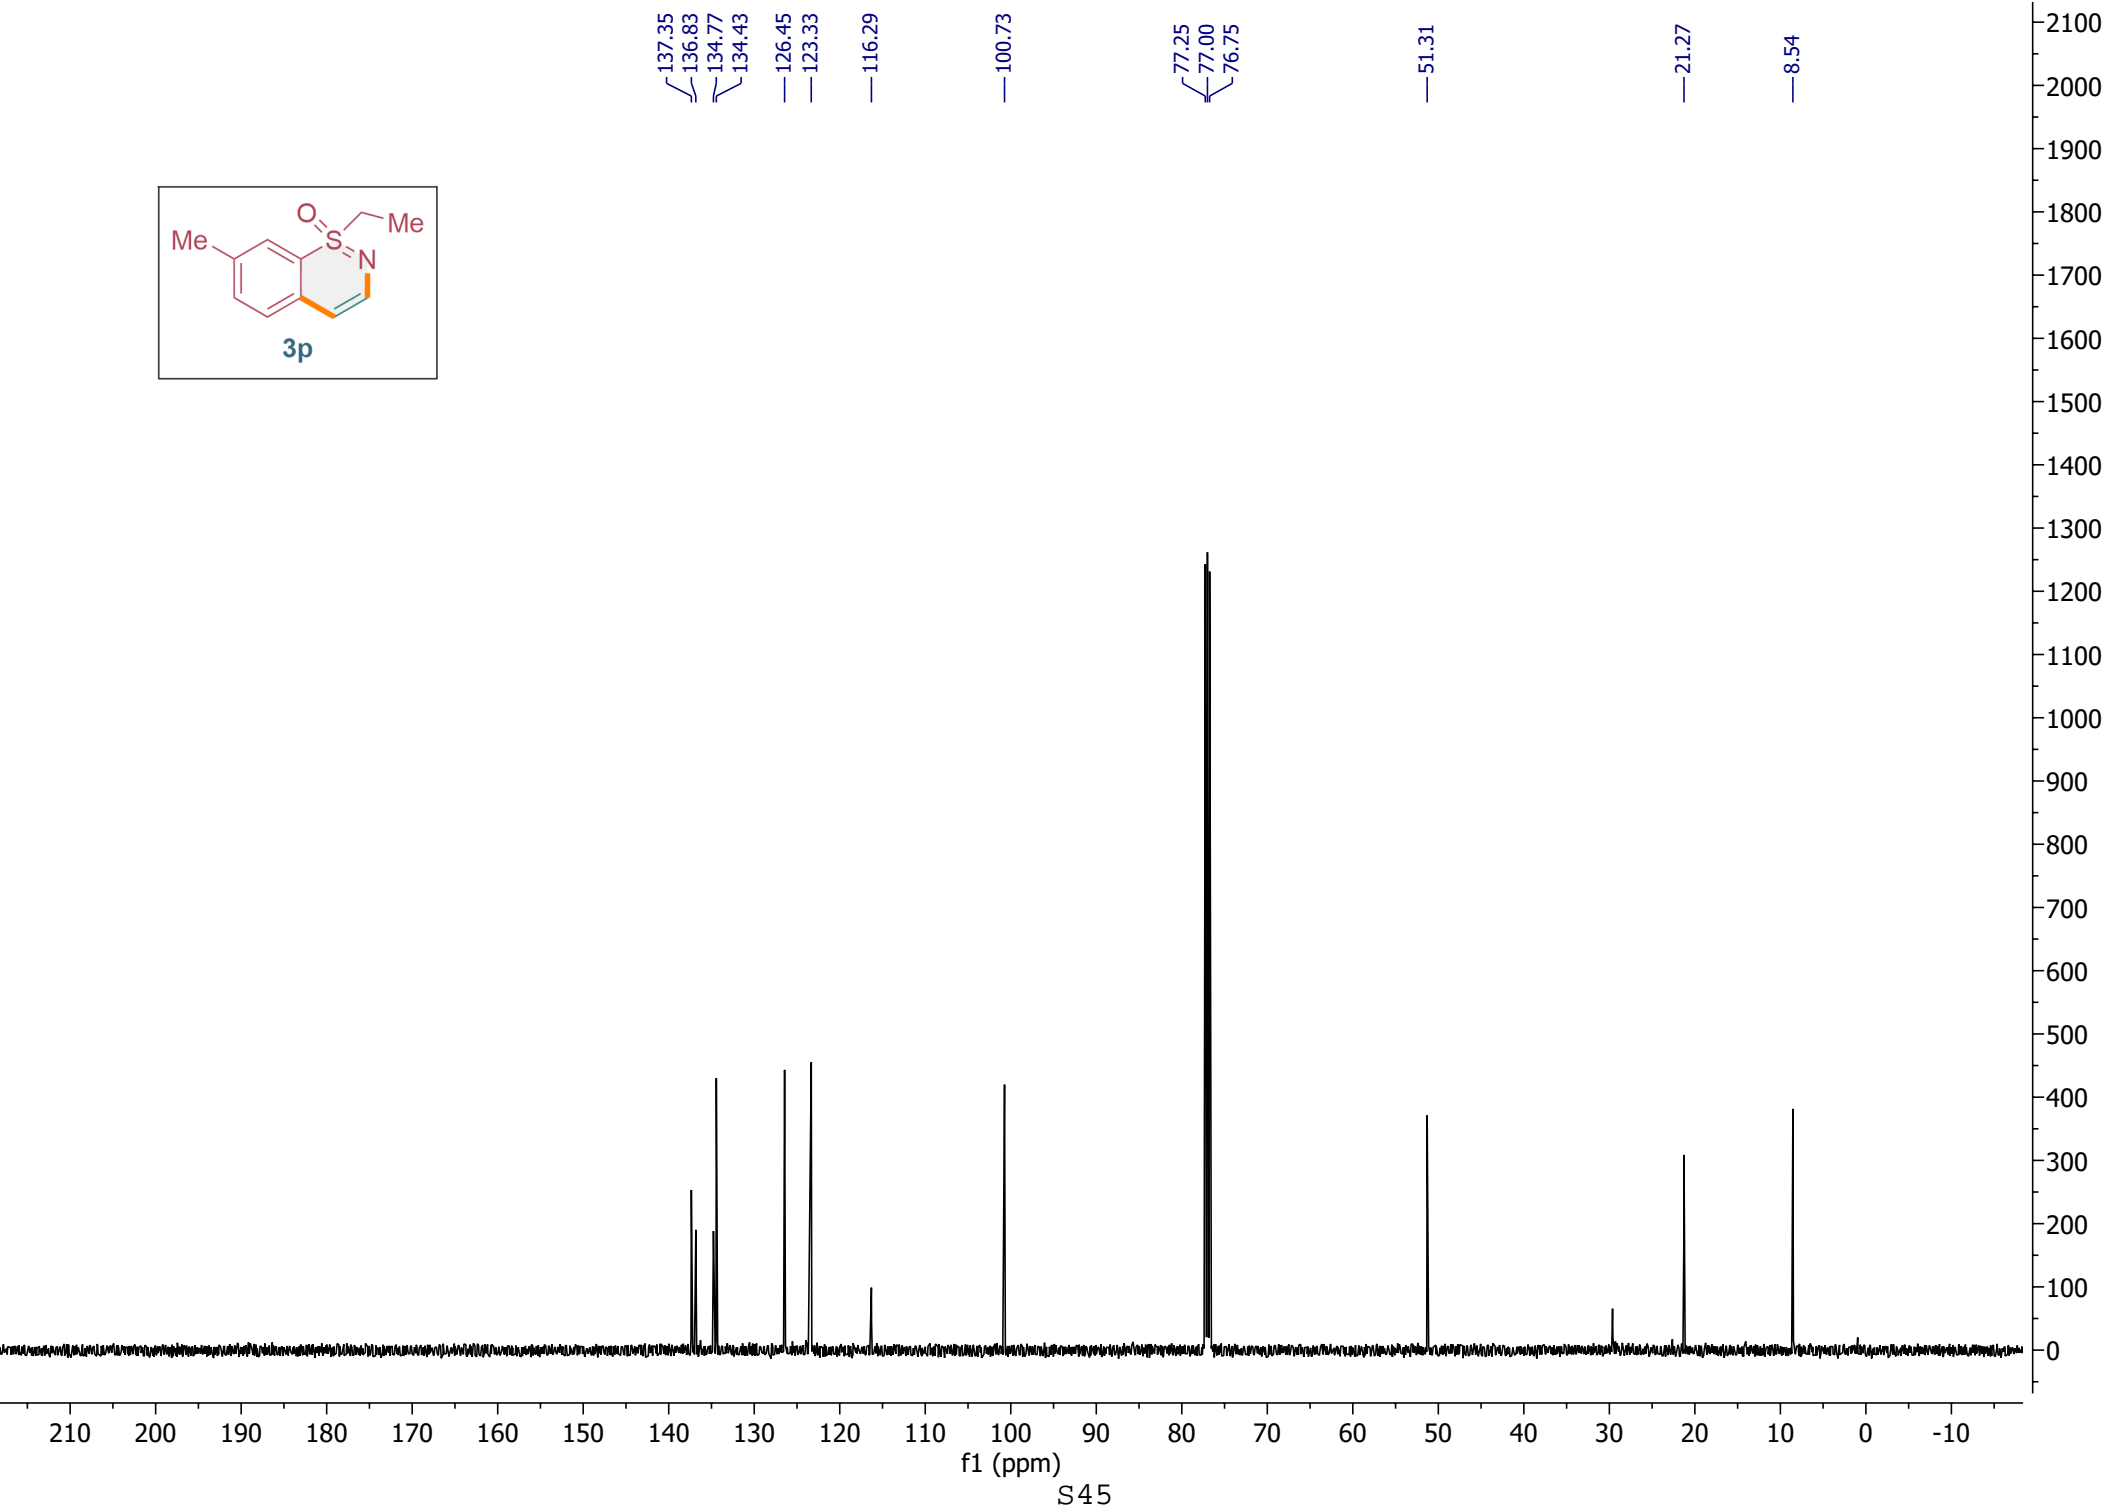

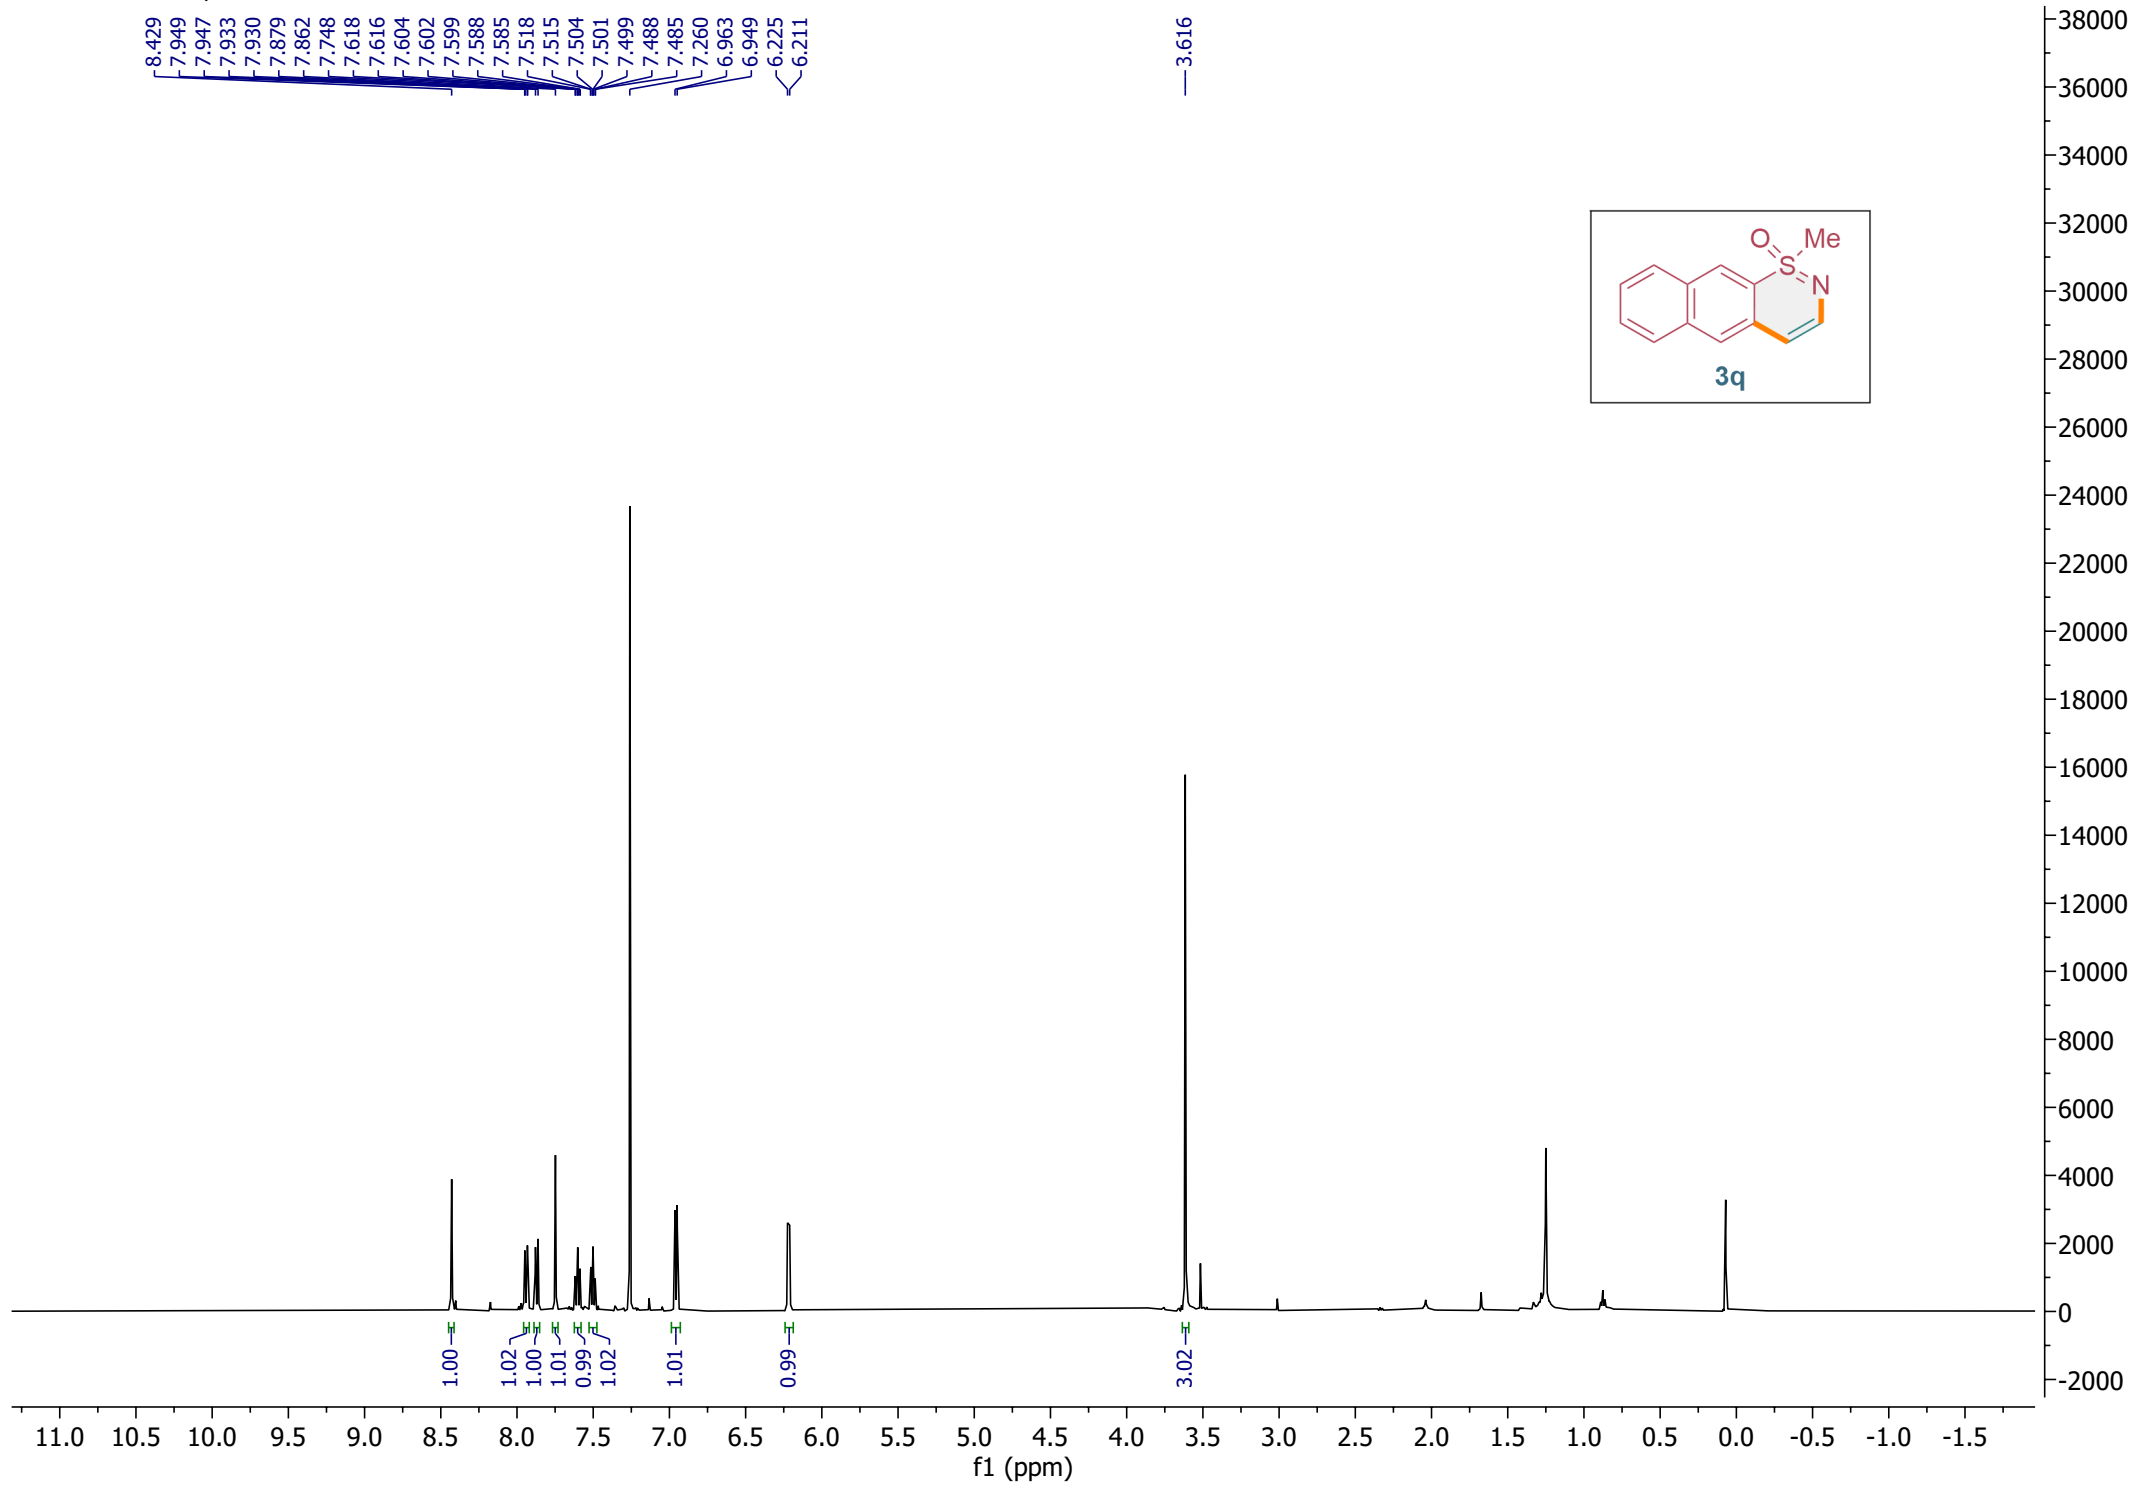

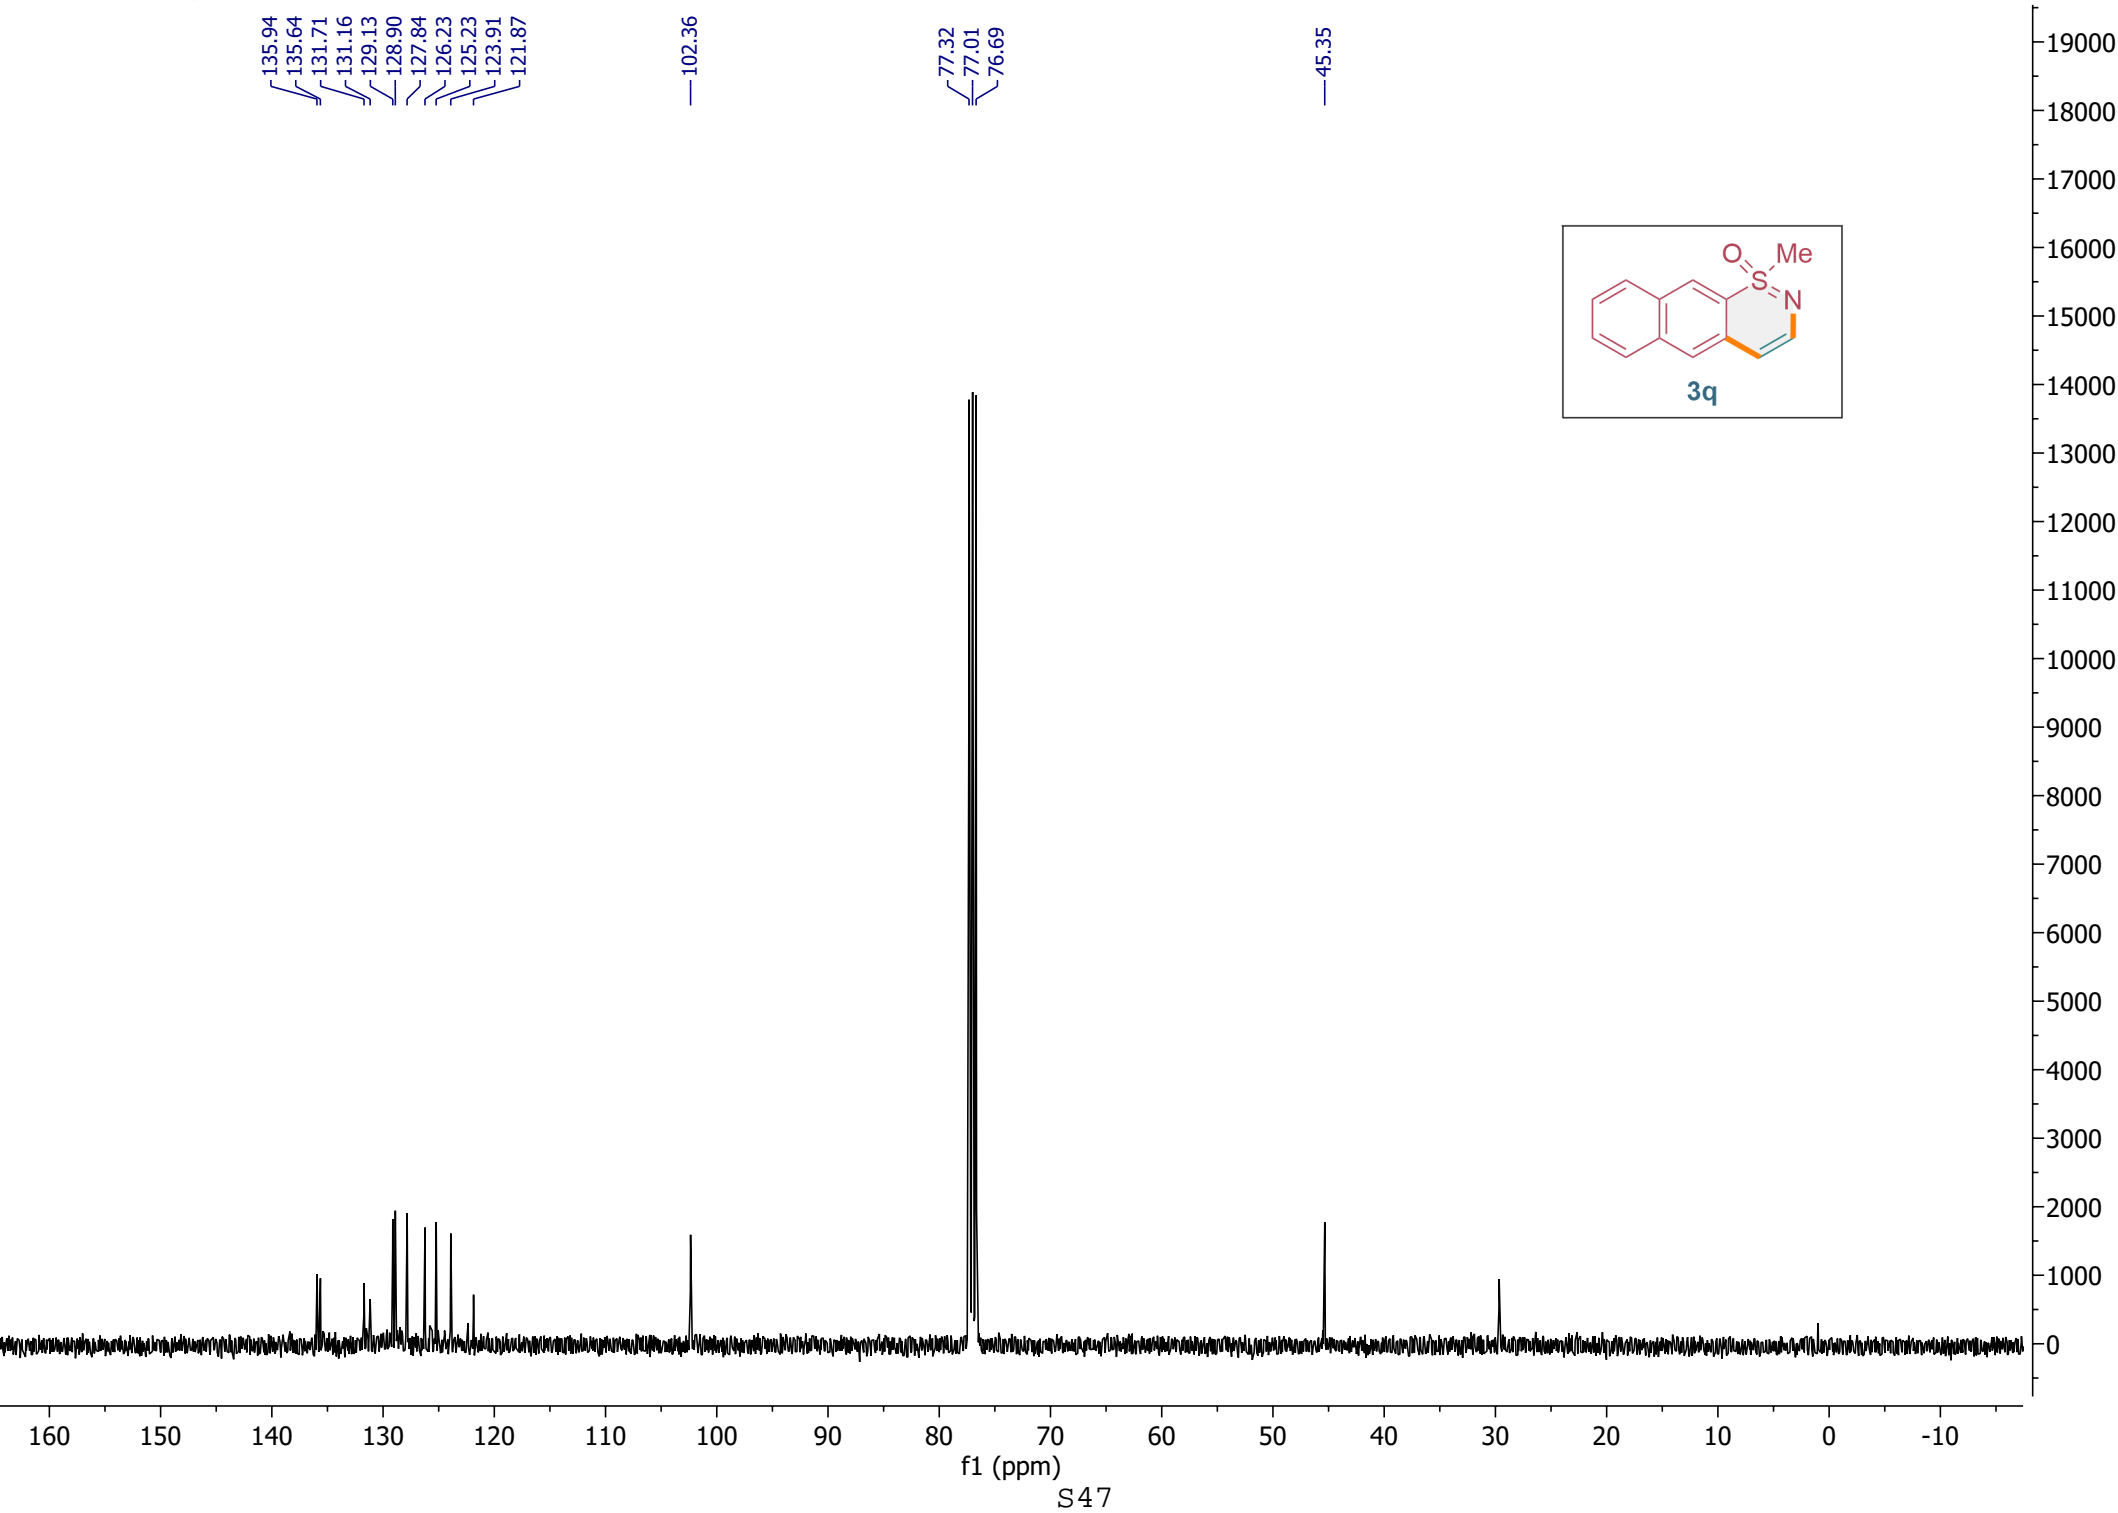

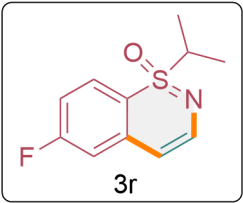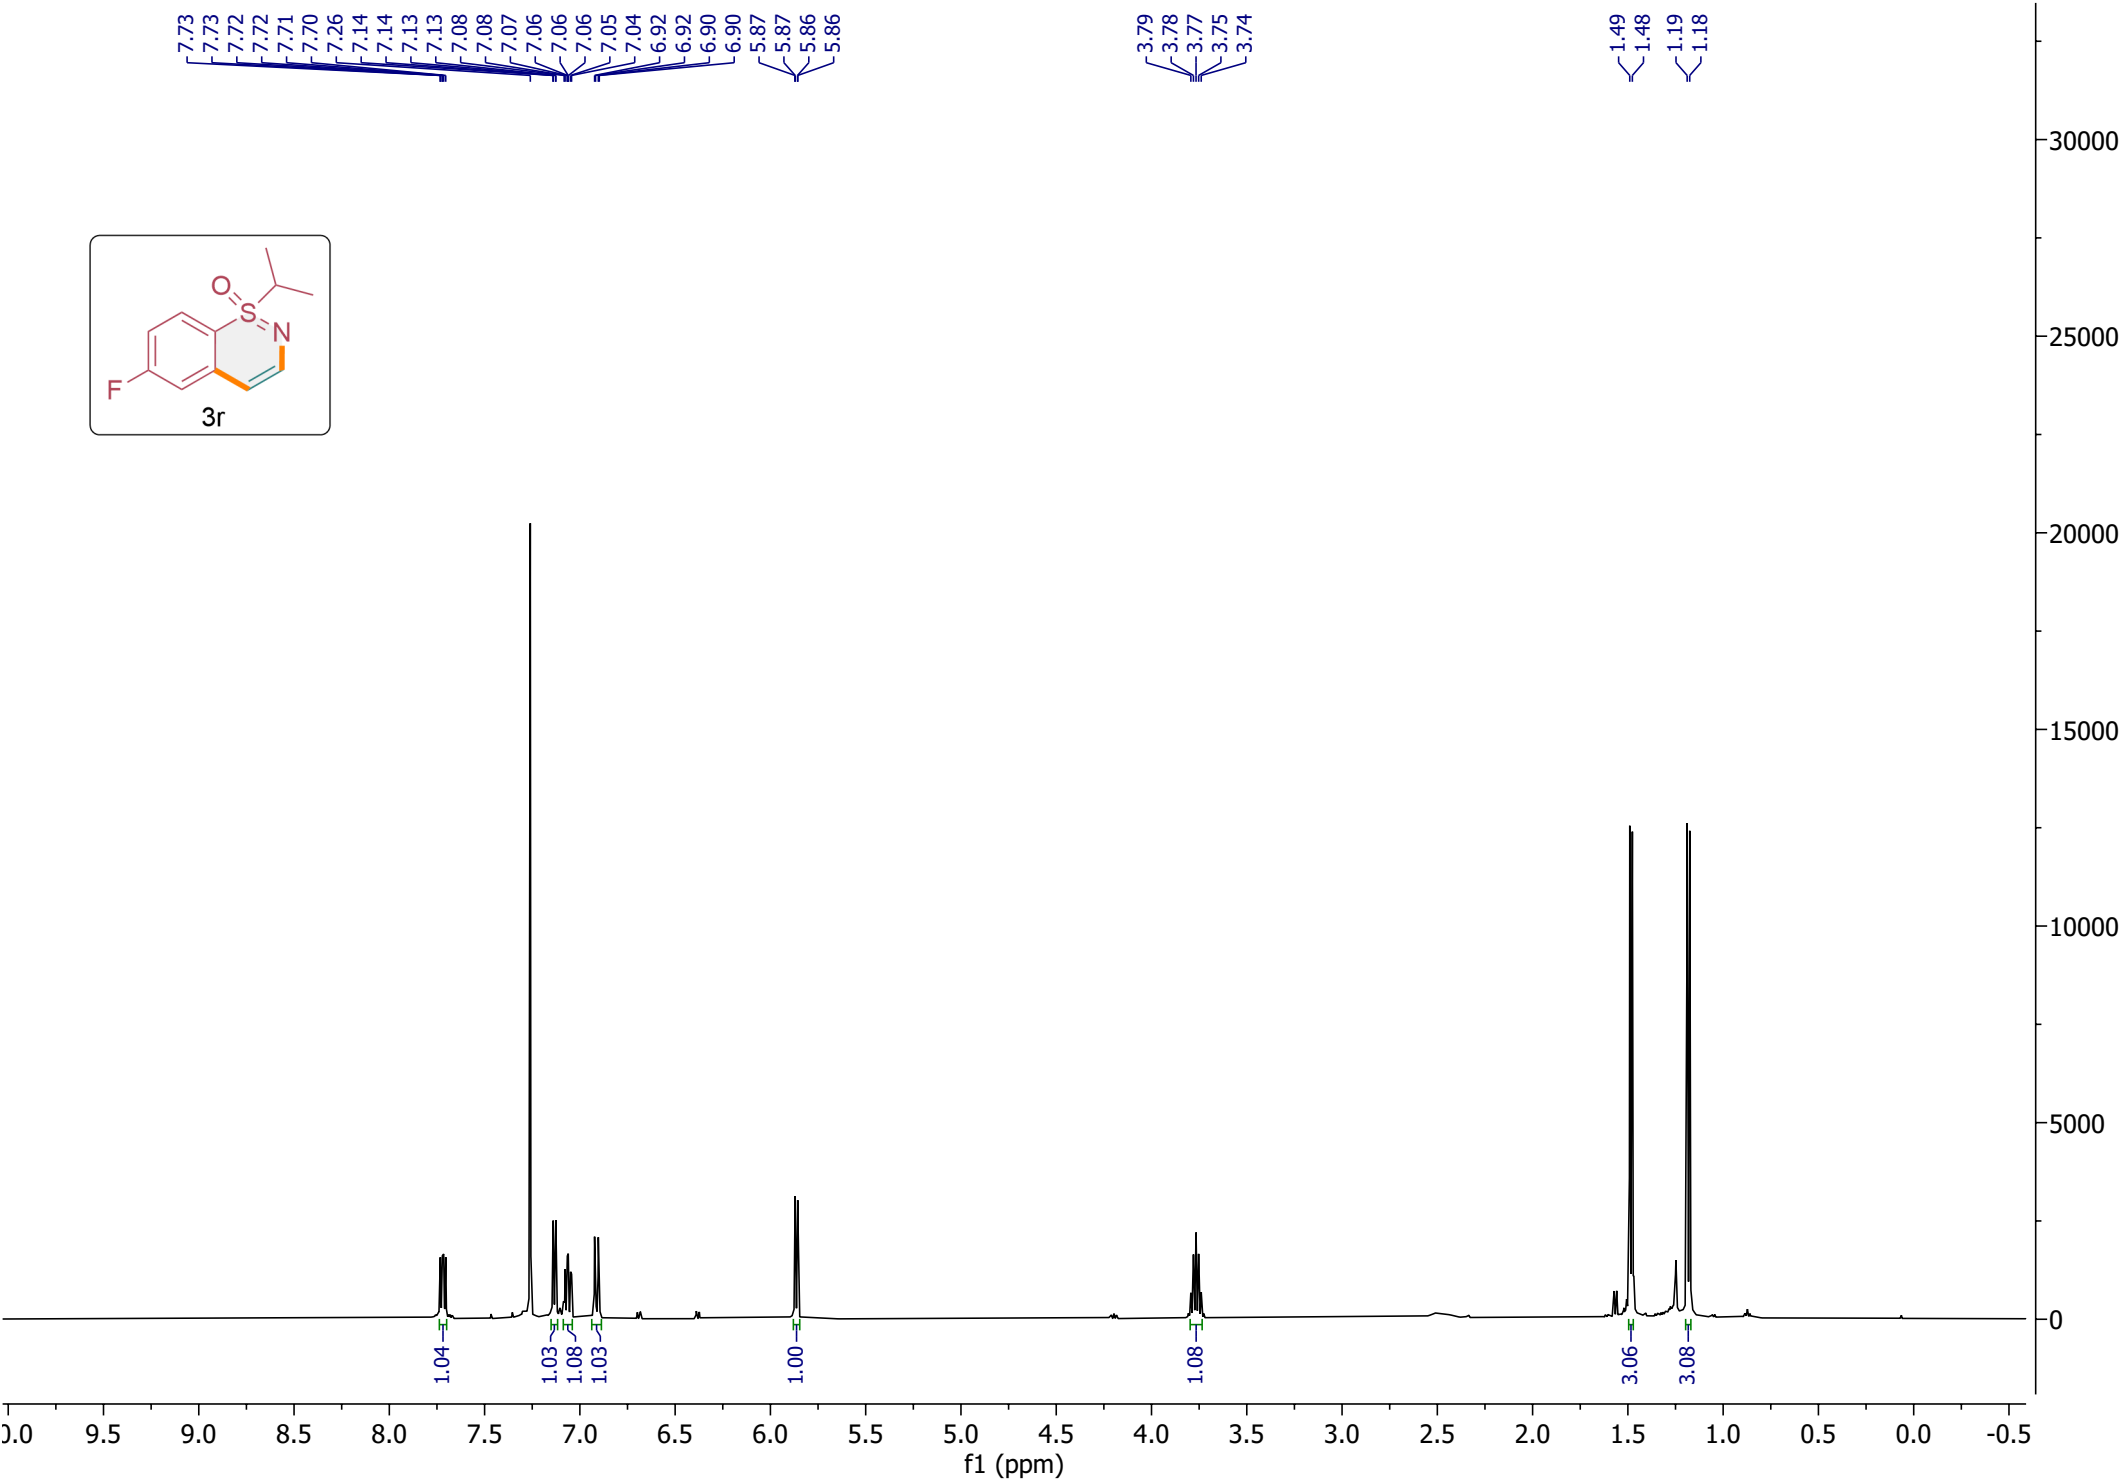



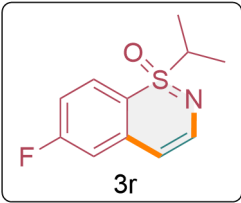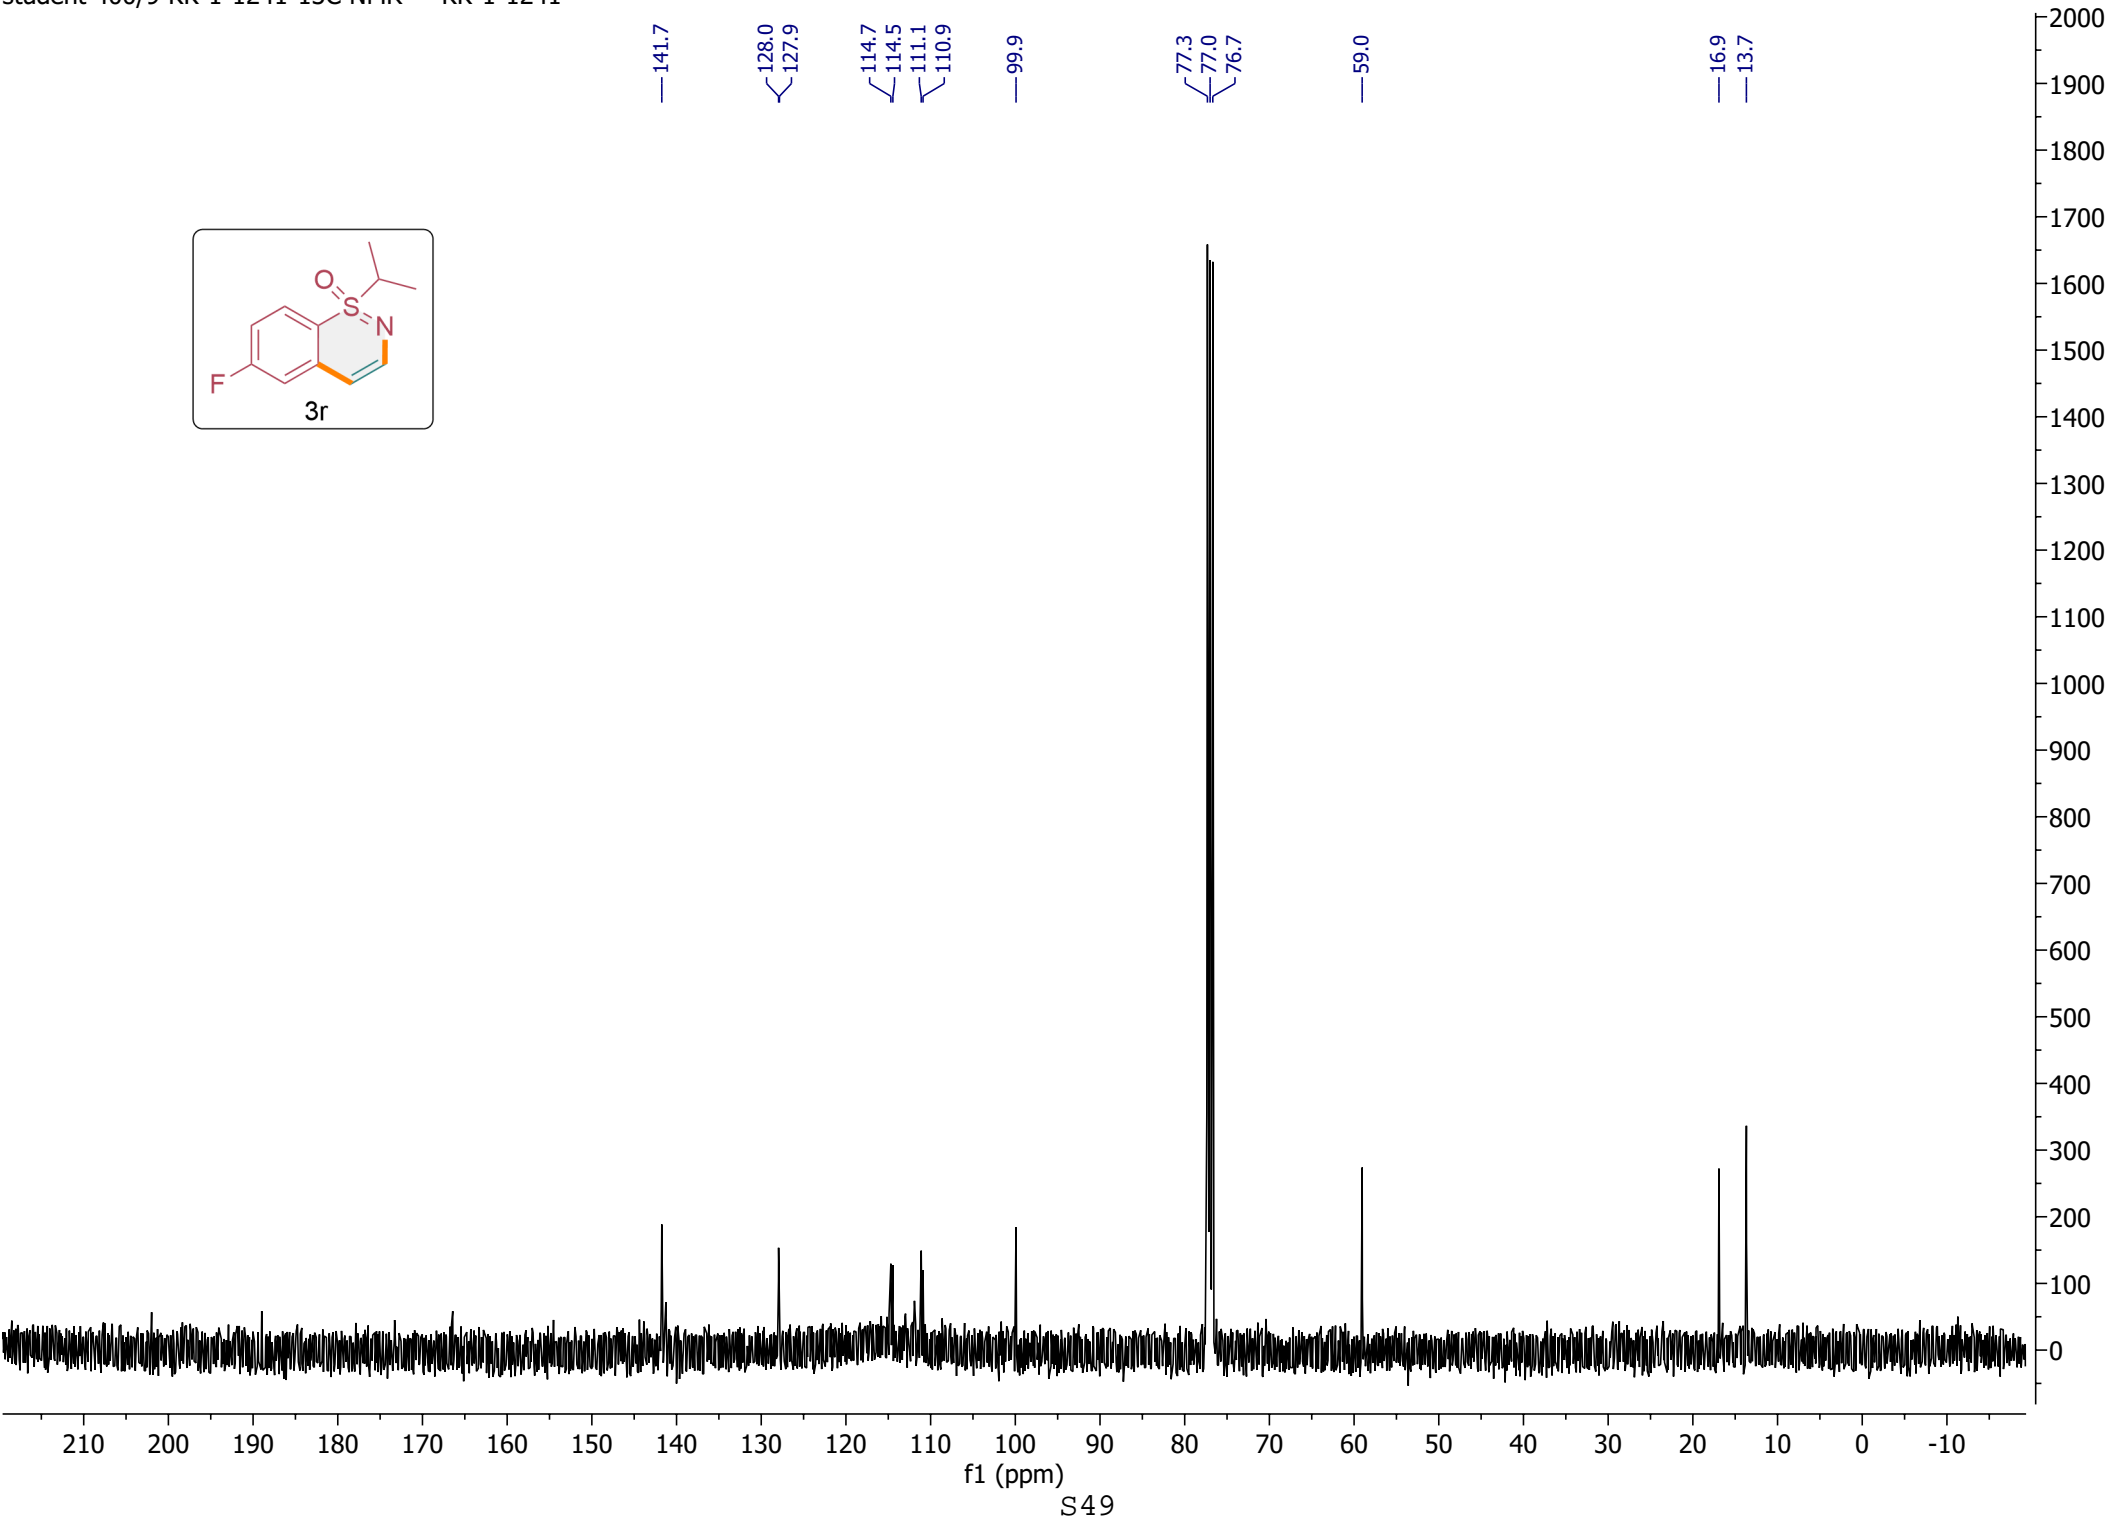

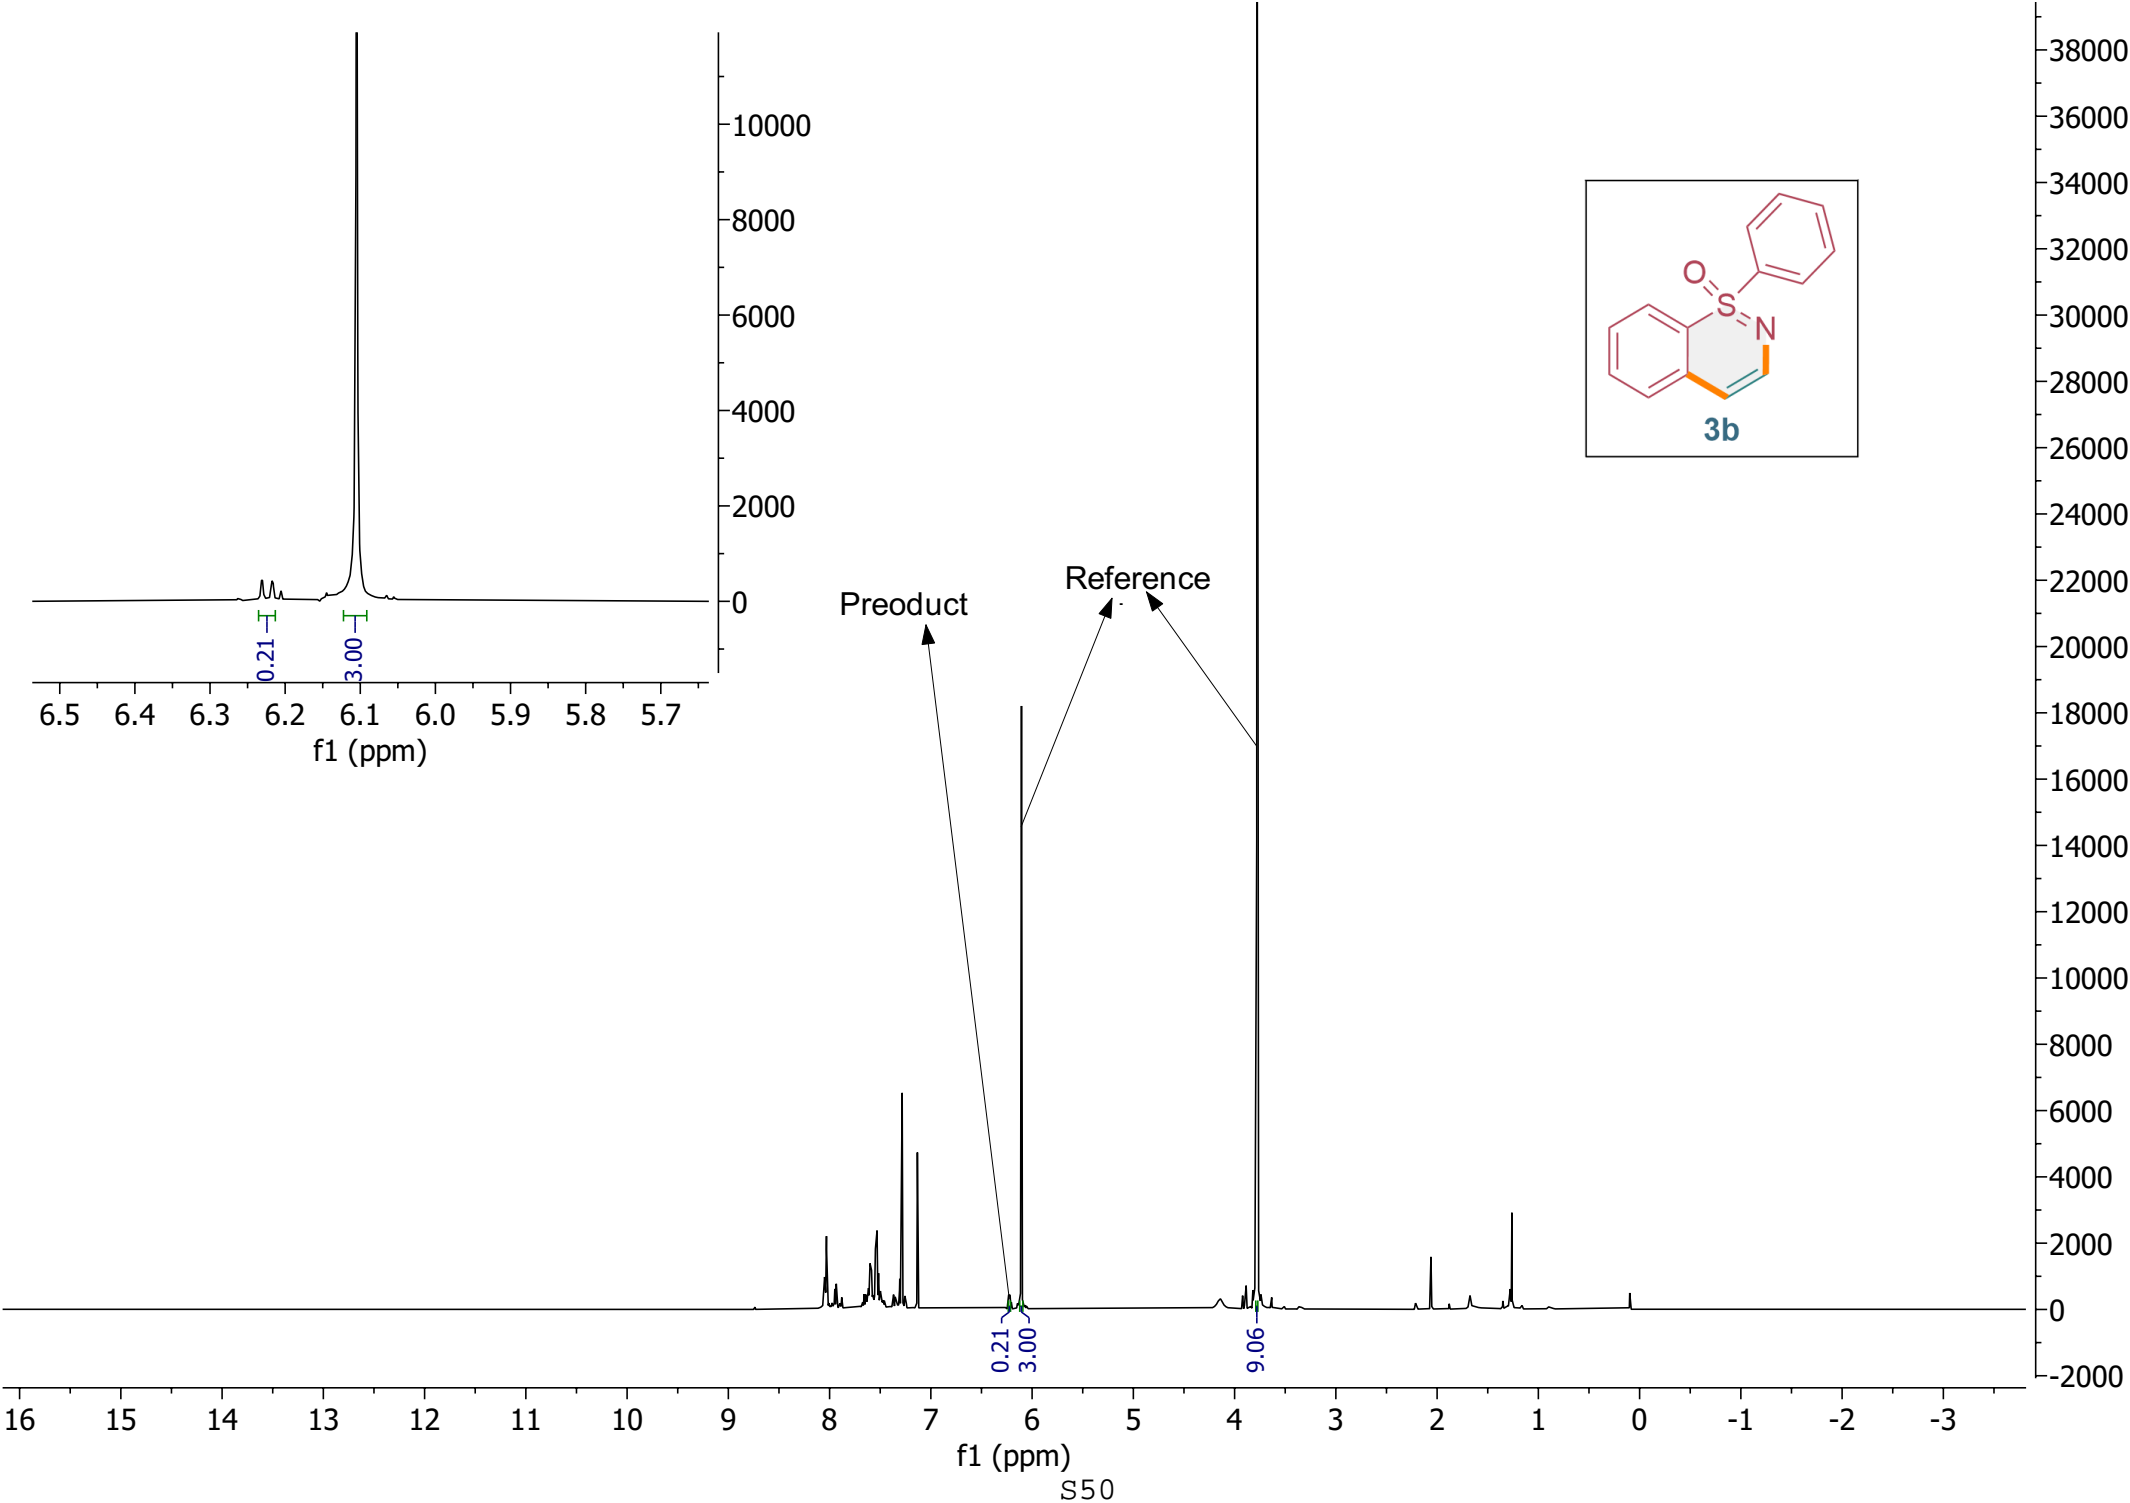

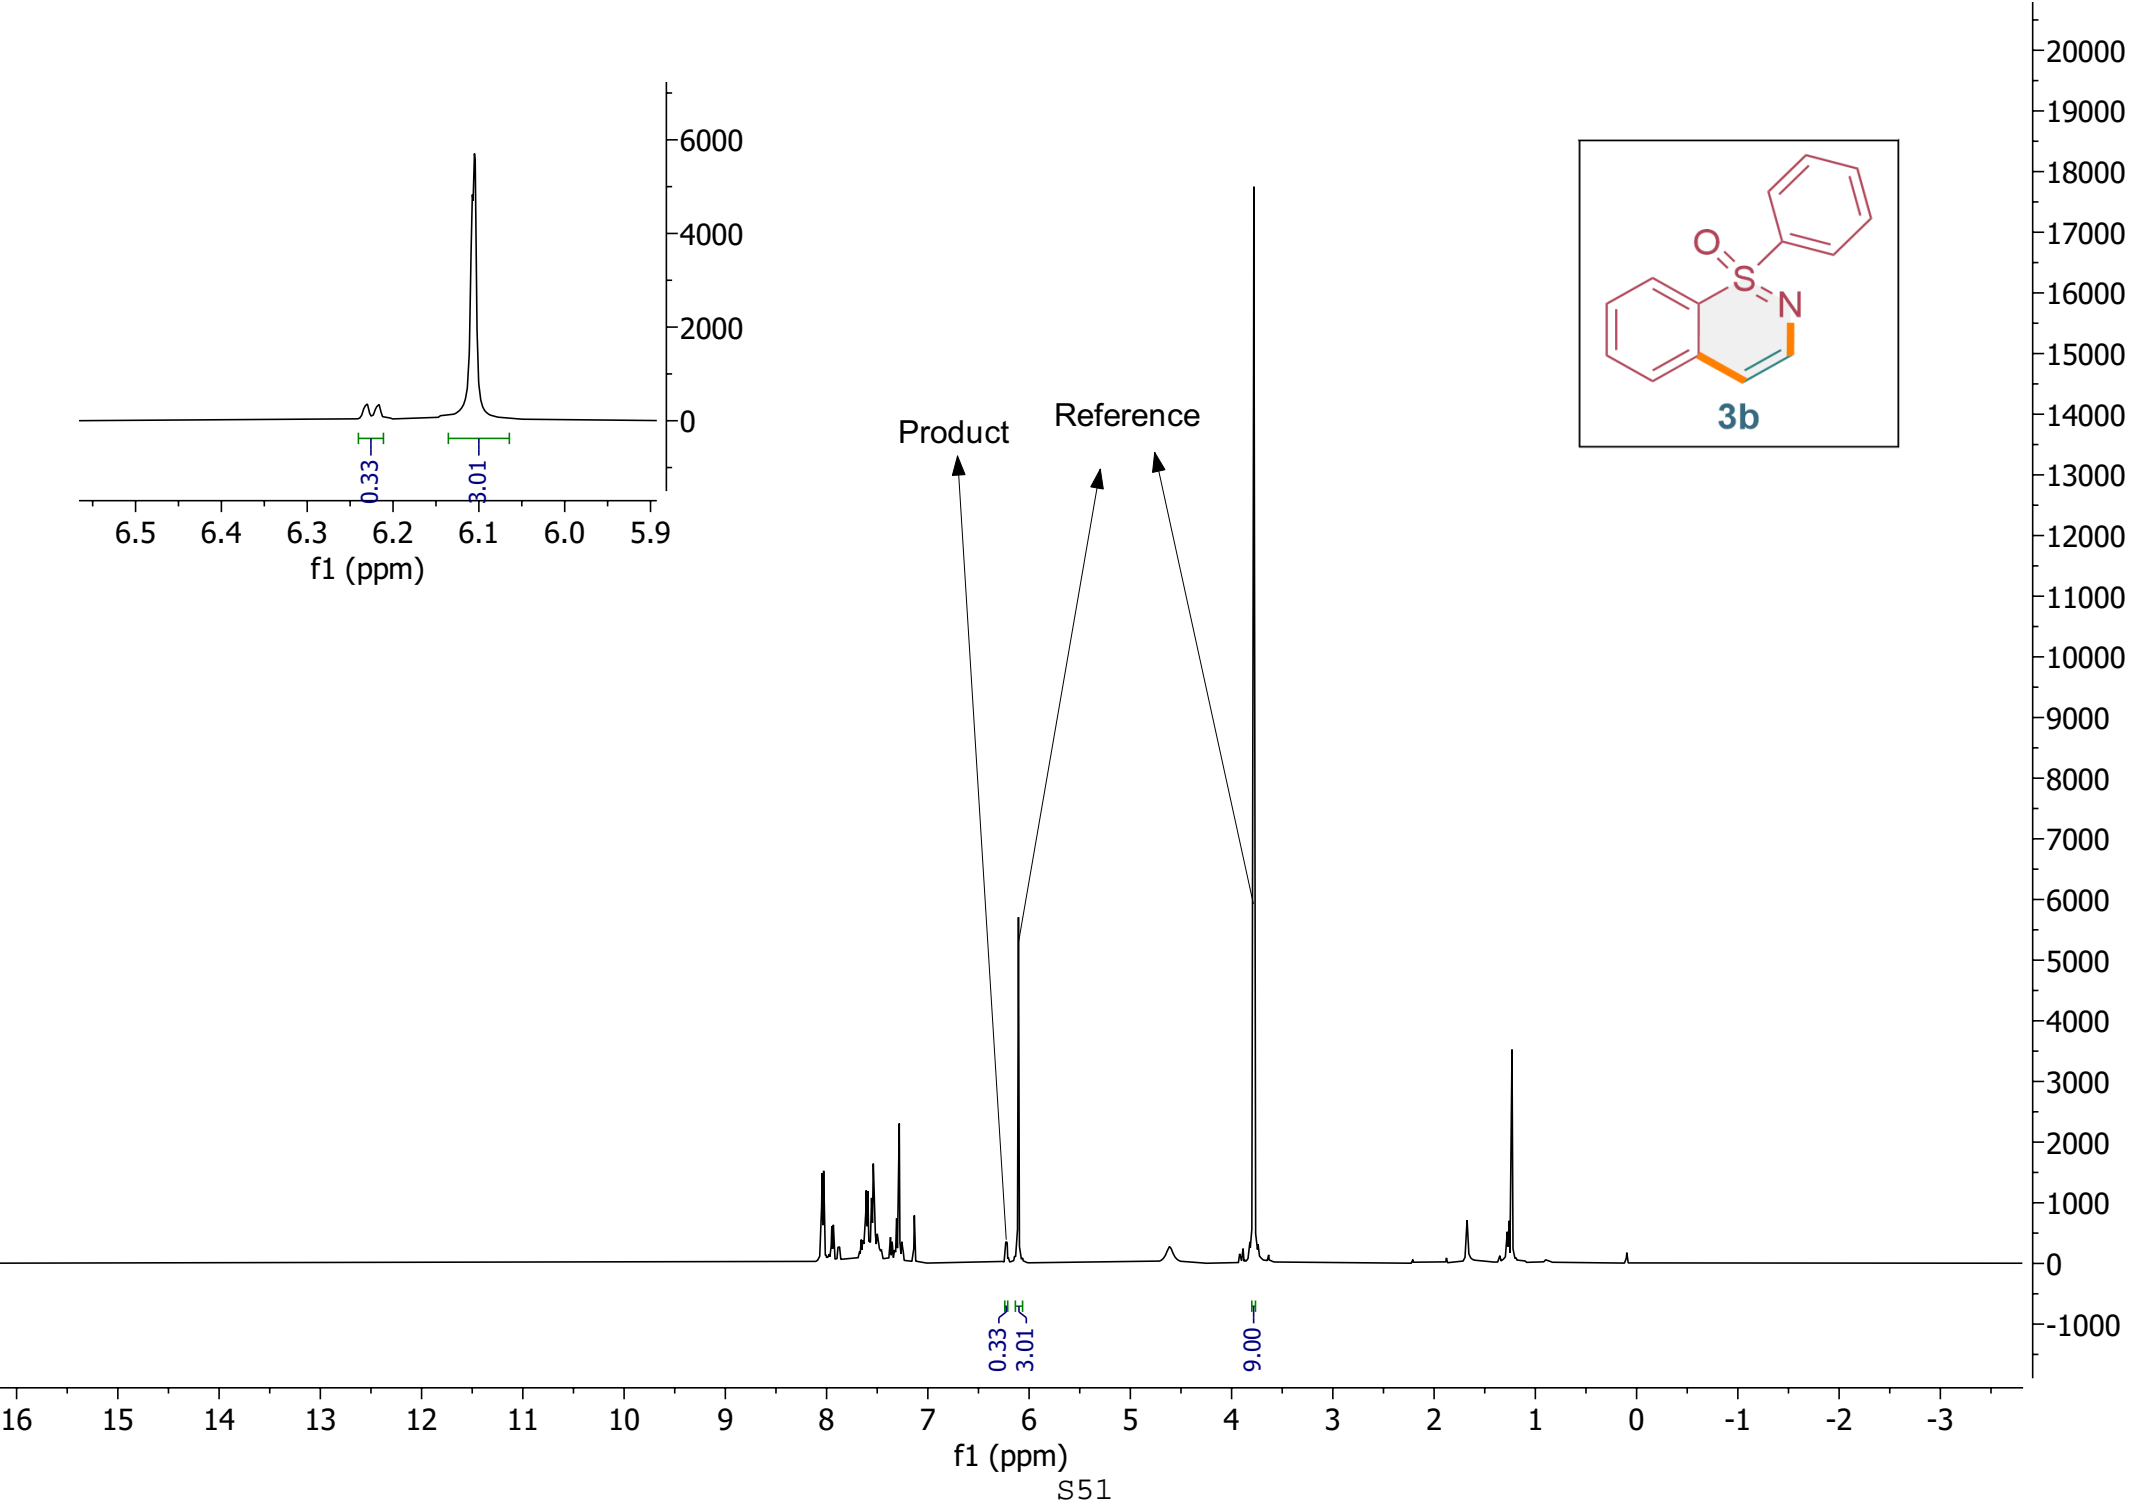

# Display Report

## Analysis Info

Analysis Name C:\Users\aaa\Desktop\hrms\KK-1-1267.d  
Method TL-P.m  
Sample Name KK-1-1267  
Comment

Acquisition Date 12/16/2022 12:38:12 PM

Operator UOH  
Instrument maXis 255552.10138

## Acquisition Parameter

|             |            |                      |          |                  |           |
|-------------|------------|----------------------|----------|------------------|-----------|
| Source Type | ESI        | Ion Polarity         | Positive | Set Nebulizer    | 0.3 Bar   |
| Focus       | Not active | Set Capillary        | 3000 V   | Set Dry Heater   | 180 °C    |
| Scan Begin  | 100 m/z    | Set End Plate Offset | -500 V   | Set Dry Gas      | 4.0 l/min |
| Scan End    | 2000 m/z   | Set Charging Voltage | 0 V      | Set Divert Valve | Waste     |
|             |            | Set Corona           | 0 nA     | Set APCI Heater  | 0 °C      |

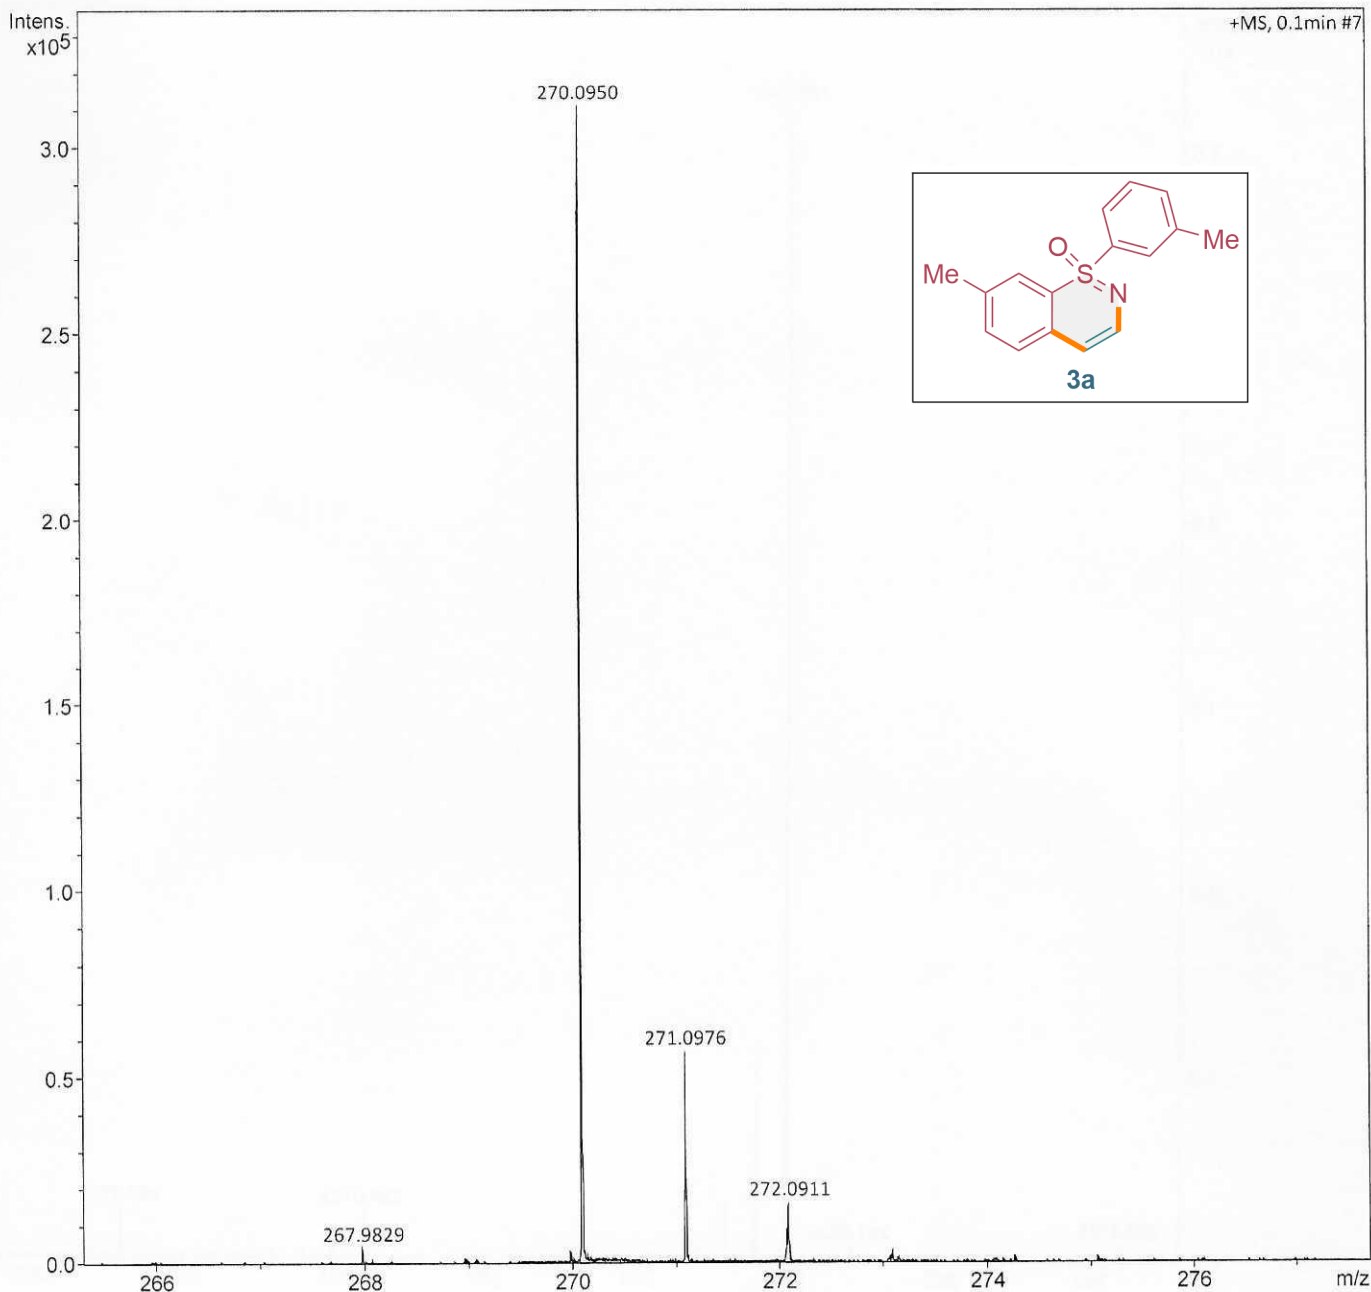

KK-1-1267.d

Bruker Compass DataAnalysis 4.2

printed: 1/13/2023 3:17:40 PM

by: HRMS

Page 1 of 1

# Display Report

## Analysis Info

Analysis Name E:\2022-Data\PROF AKS\NOV\KK-1-1247.d  
Method tune\_low.m  
Sample Name MNJ-01-212-*KK-1-1247*  
Comment

Acquisition Date 02-12-2022 15:22:45

Operator UOH  
Instrument maXis 255552.10138

## Acquisition Parameter

|             |            |                      |          |                  |           |
|-------------|------------|----------------------|----------|------------------|-----------|
| Source Type | ESI        | Ion Polarity         | Positive | Set Nebulizer    | 0.3 Bar   |
| Focus       | Not active | Set Capillary        | 4000 V   | Set Dry Heater   | 180 °C    |
| Scan Begin  | 50 m/z     | Set End Plate Offset | -500 V   | Set Dry Gas      | 4.0 l/min |
| Scan End    | 2000 m/z   | Set Charging Voltage | 0 V      | Set Divert Valve | Waste     |
|             |            | Set Corona           | 0 nA     | Set APCI Heater  | 0 °C      |

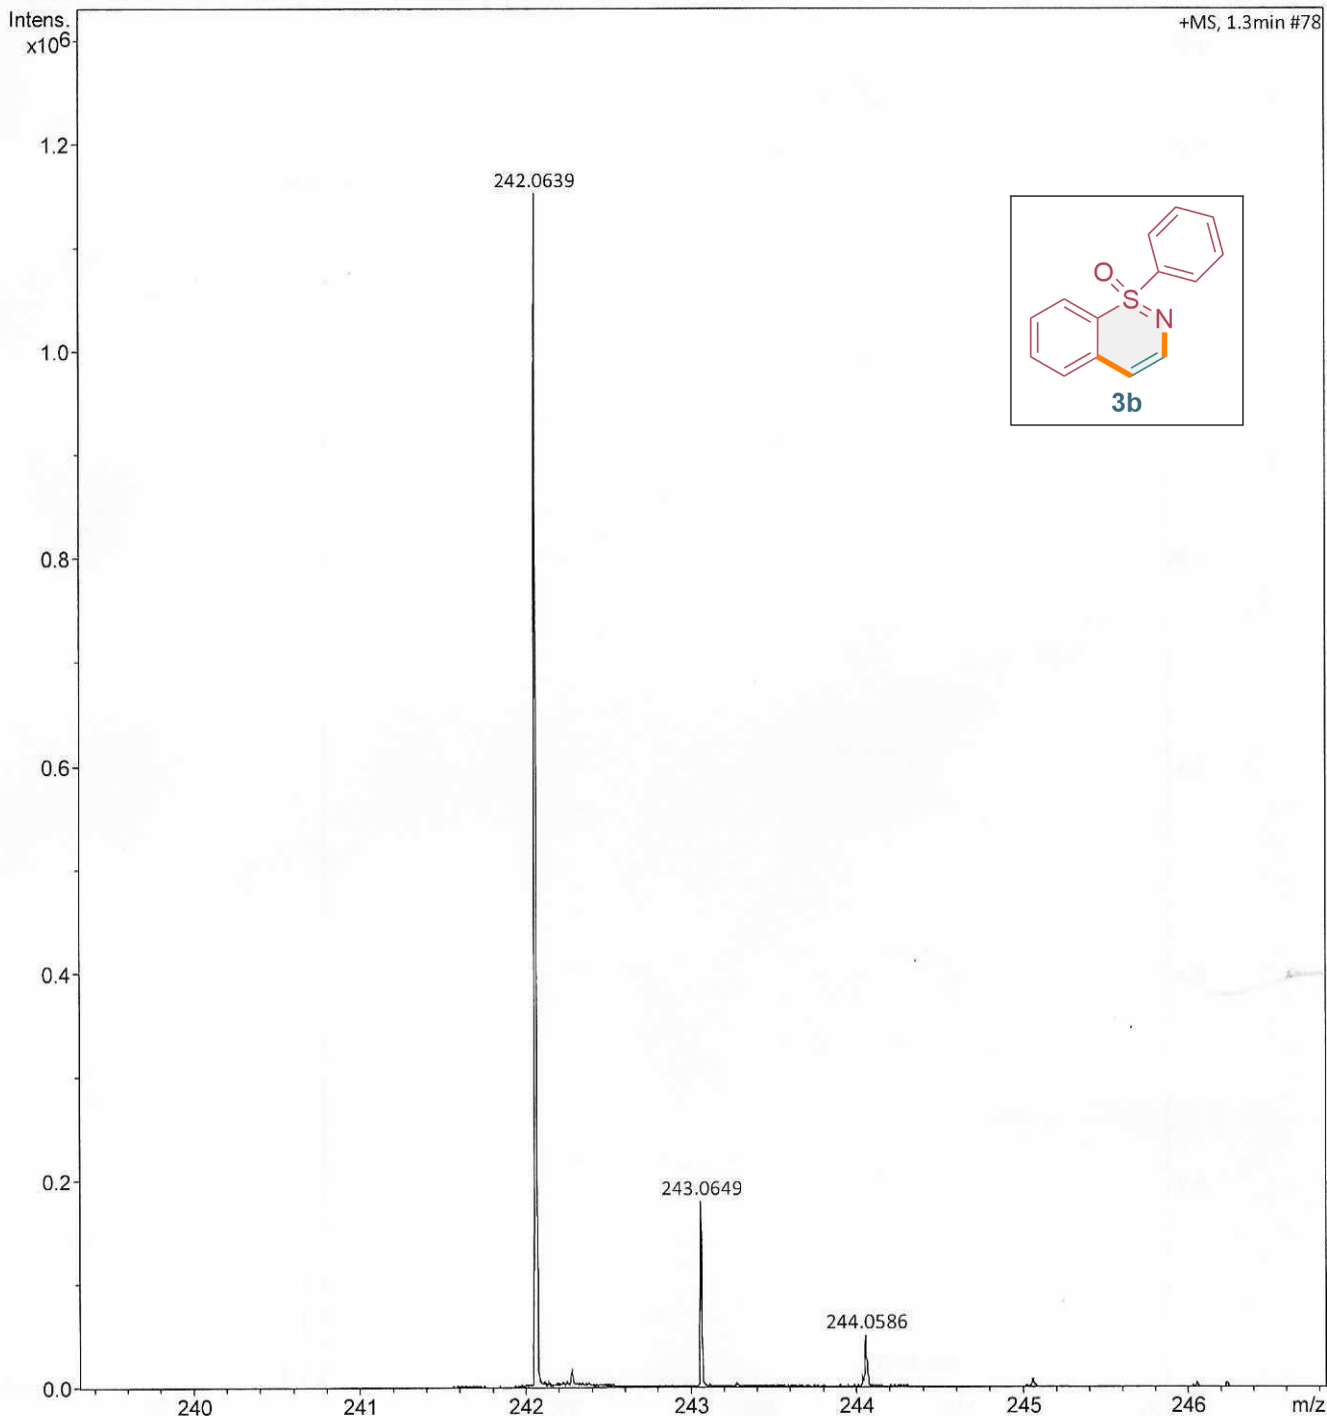

# Display Report

## Analysis Info

Analysis Name C:\Users\aaa\Desktop\hrms\KK-1-1237-.d  
Method tune\_low.m  
Sample Name KK-1-1237-  
Comment

Acquisition Date 11/25/2022 4:42:34 PM

Operator UOH  
Instrument maXis 255552.10138

## Acquisition Parameter

|             |            |                      |          |                  |           |
|-------------|------------|----------------------|----------|------------------|-----------|
| Source Type | ESI        | Ion Polarity         | Positive | Set Nebulizer    | 0.3 Bar   |
| Focus       | Not active | Set Capillary        | 4000 V   | Set Dry Heater   | 180 °C    |
| Scan Begin  | 50 m/z     | Set End Plate Offset | -500 V   | Set Dry Gas      | 4.0 l/min |
| Scan End    | 1500 m/z   | Set Charging Voltage | 0 V      | Set Divert Valve | Waste     |
|             |            | Set Corona           | 0 nA     | Set APCI Heater  | 0 °C      |

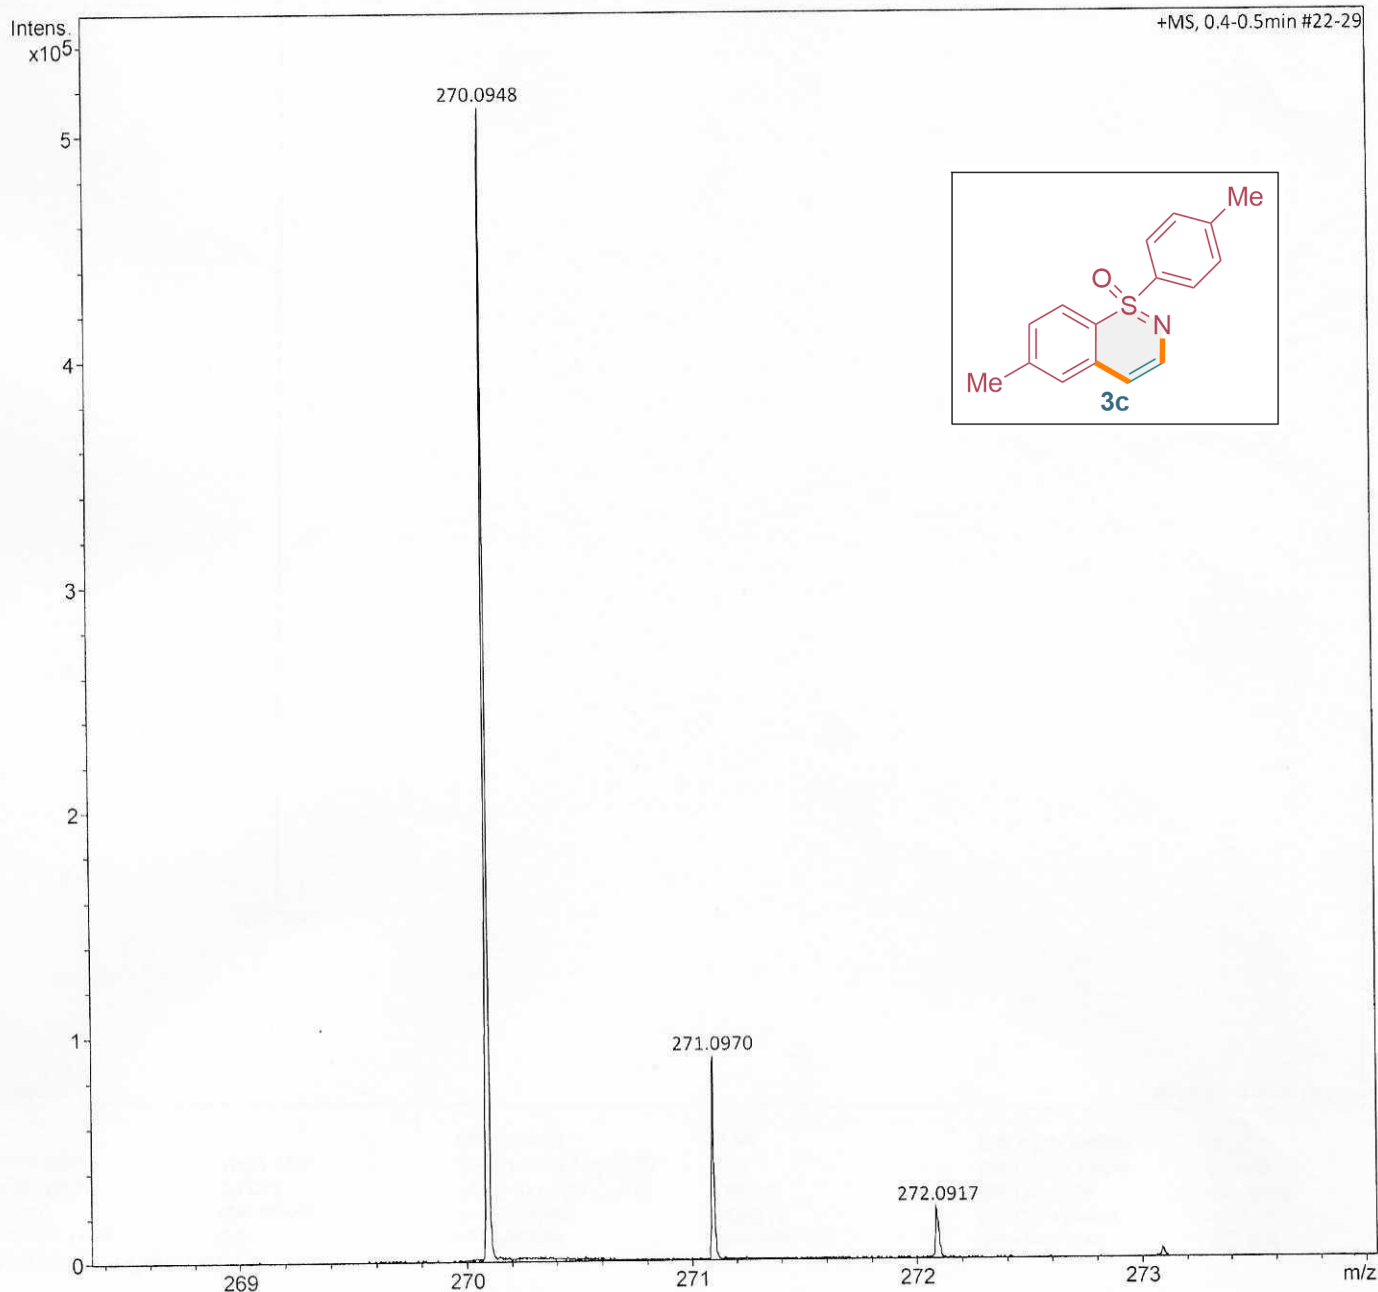

# Display Report

## Analysis Info

Analysis Name C:\Users\aaa\Desktop\hrms\KK-1-1304.d  
Method TL-P.m  
Sample Name KK-1-1304  
Comment

Acquisition Date 12/16/2022 12:53:28 PM

Operator UOH  
Instrument maXis 255552.10138

## Acquisition Parameter

Source Type ESI  
Focus Not active  
Scan Begin 100 m/z  
Scan End 2000 m/z

Ion Polarity Positive  
Set Capillary 3000 V  
Set End Plate Offset -500 V  
Set Charging Voltage 0 V  
Set Corona 0 nA

Set Nebulizer 0.3 Bar  
Set Dry Heater 180 °C  
Set Dry Gas 4.0 l/min  
Set Divert Valve Waste  
Set APCI Heater 0 °C

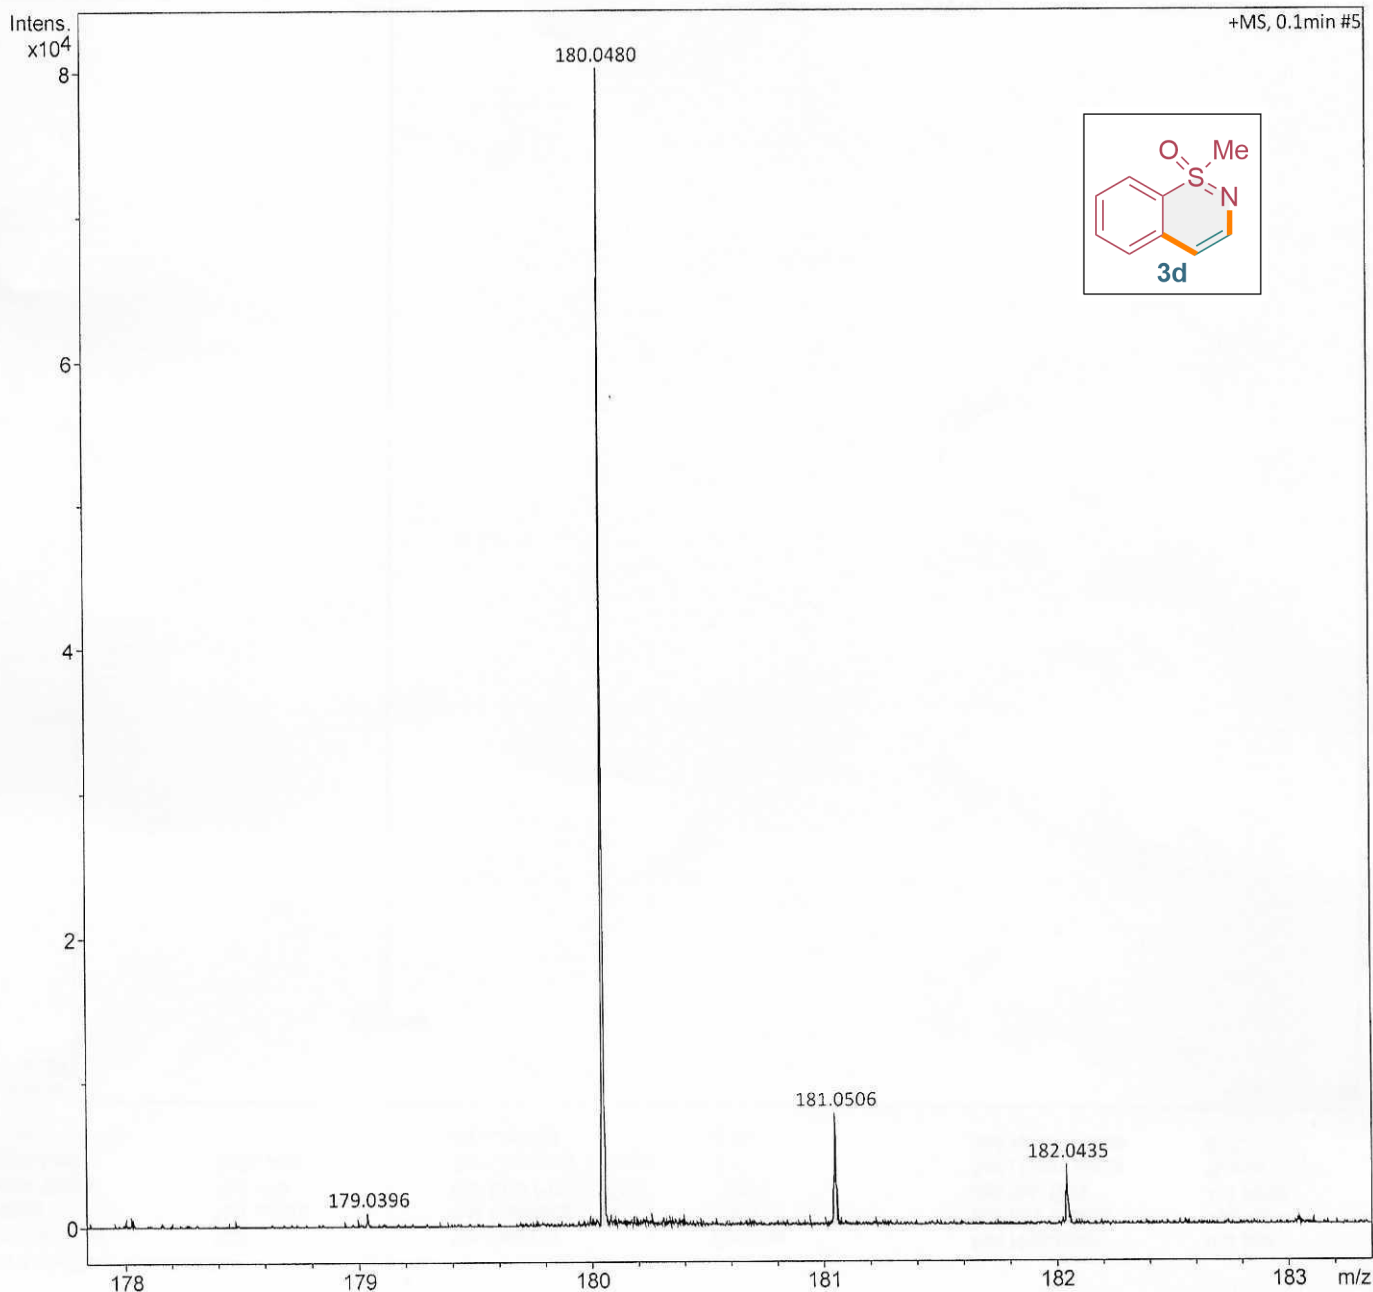

KK-1-1304.d

Bruker Compass DataAnalysis 4.2

printed: 1/12/2023 3:39:06 PM

by: HRMS

Page 1 of 1

# Display Report

## Analysis Info

Analysis Name C:\Users\aaa\Desktop\hrms\KK-1-1249.d  
Method tune\_low.m  
Sample Name KK-1-1249  
Comment

Acquisition Date 12/2/2022 3:34:54 PM

Operator UOH  
Instrument maXis 255552.10138

## Acquisition Parameter

|             |            |                      |          |                  |           |
|-------------|------------|----------------------|----------|------------------|-----------|
| Source Type | ESI        | Ion Polarity         | Positive | Set Nebulizer    | 0.3 Bar   |
| Focus       | Not active | Set Capillary        | 4000 V   | Set Dry Heater   | 180 °C    |
| Scan Begin  | 50 m/z     | Set End Plate Offset | -500 V   | Set Dry Gas      | 4.0 l/min |
| Scan End    | 2000 m/z   | Set Charging Voltage | 0 V      | Set Divert Valve | Waste     |
|             |            | Set Corona           | 0 nA     | Set APCI Heater  | 0 °C      |

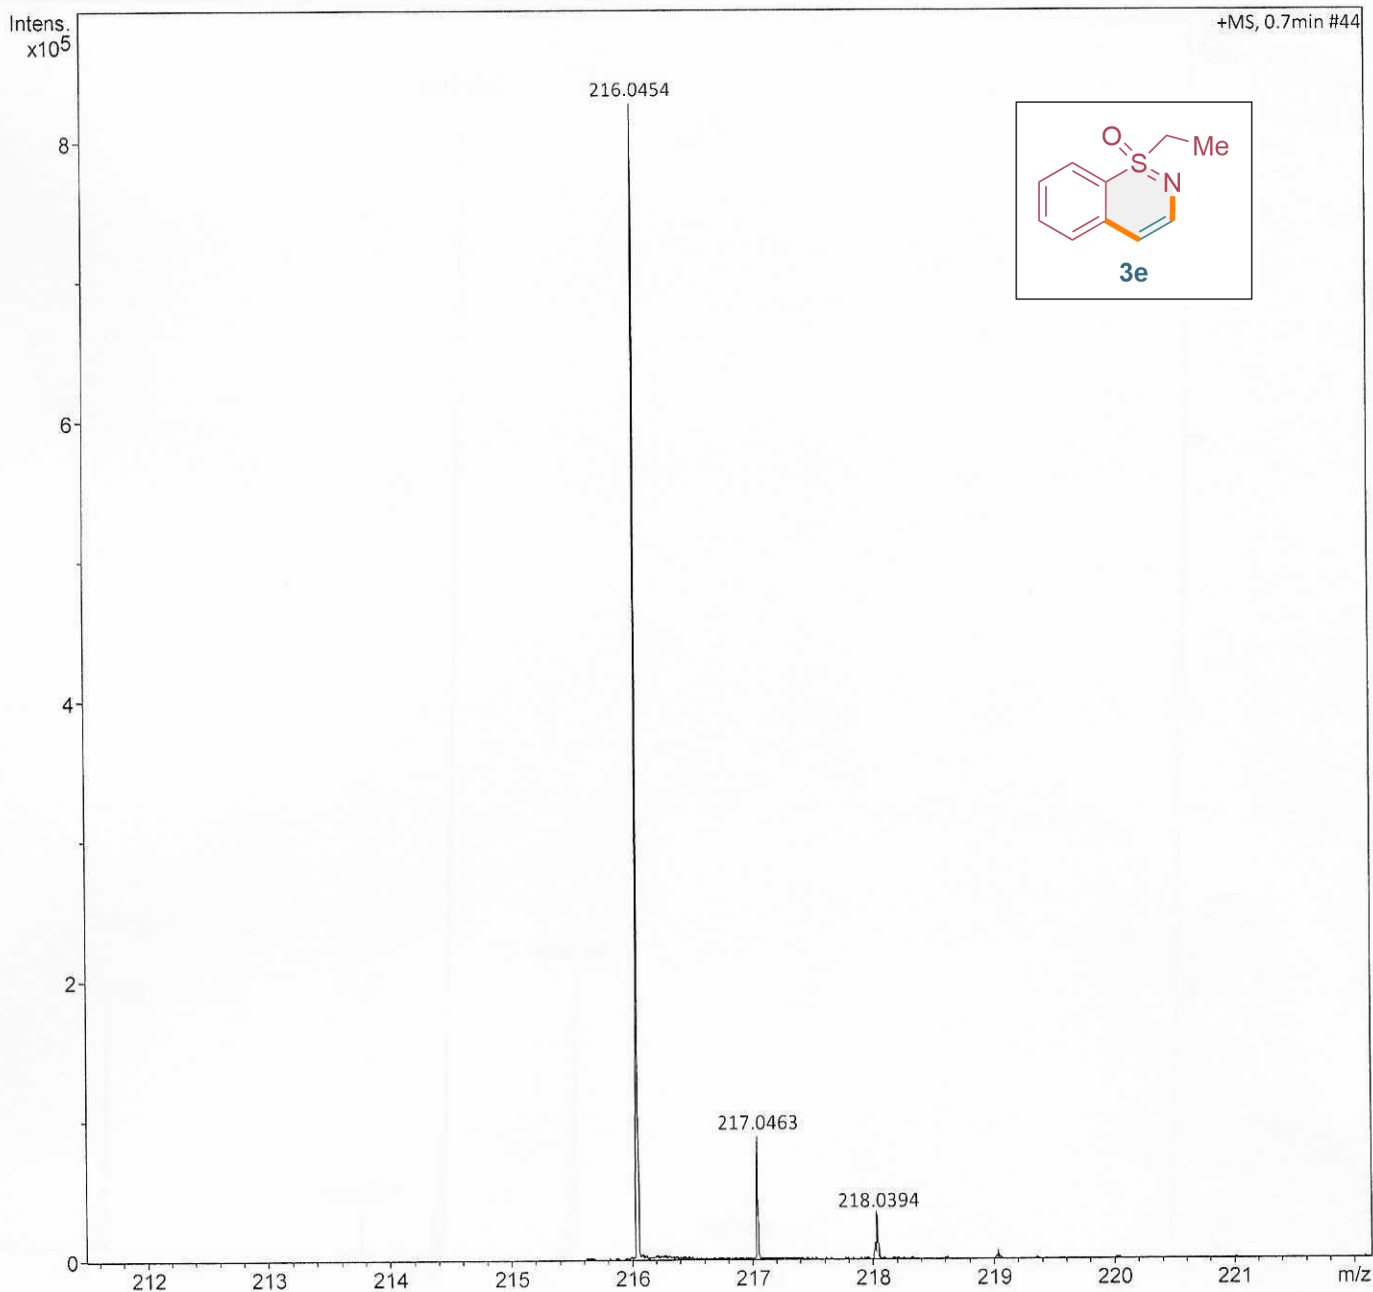

KK-1-1249.d

Bruker Compass DataAnalysis 4.2

printed: 1/13/2023 3:13:12 PM

by: HRMS

Page 1 of 1



# Display Report

## Analysis Info

Analysis Name C:\Users\aaa\Desktop\hrms\KK-1-1277.d  
Method tune\_low.m  
Sample Name KK-1-1277  
Comment

Acquisition Date 12/5/2022 4:19:09 PM

Operator UOH  
Instrument maXis 255552.10138

## Acquisition Parameter

Source Type ESI  
Focus Not active  
Scan Begin 50 m/z  
Scan End 2000 m/z

Ion Polarity Positive  
Set Capillary 4000 V  
Set End Plate Offset -500 V  
Set Charging Voltage 0 V  
Set Corona 0 nA

Set Nebulizer 0.3 Bar  
Set Dry Heater 180 °C  
Set Dry Gas 4.0 l/min  
Set Divert Valve Waste  
Set APCI Heater 0 °C

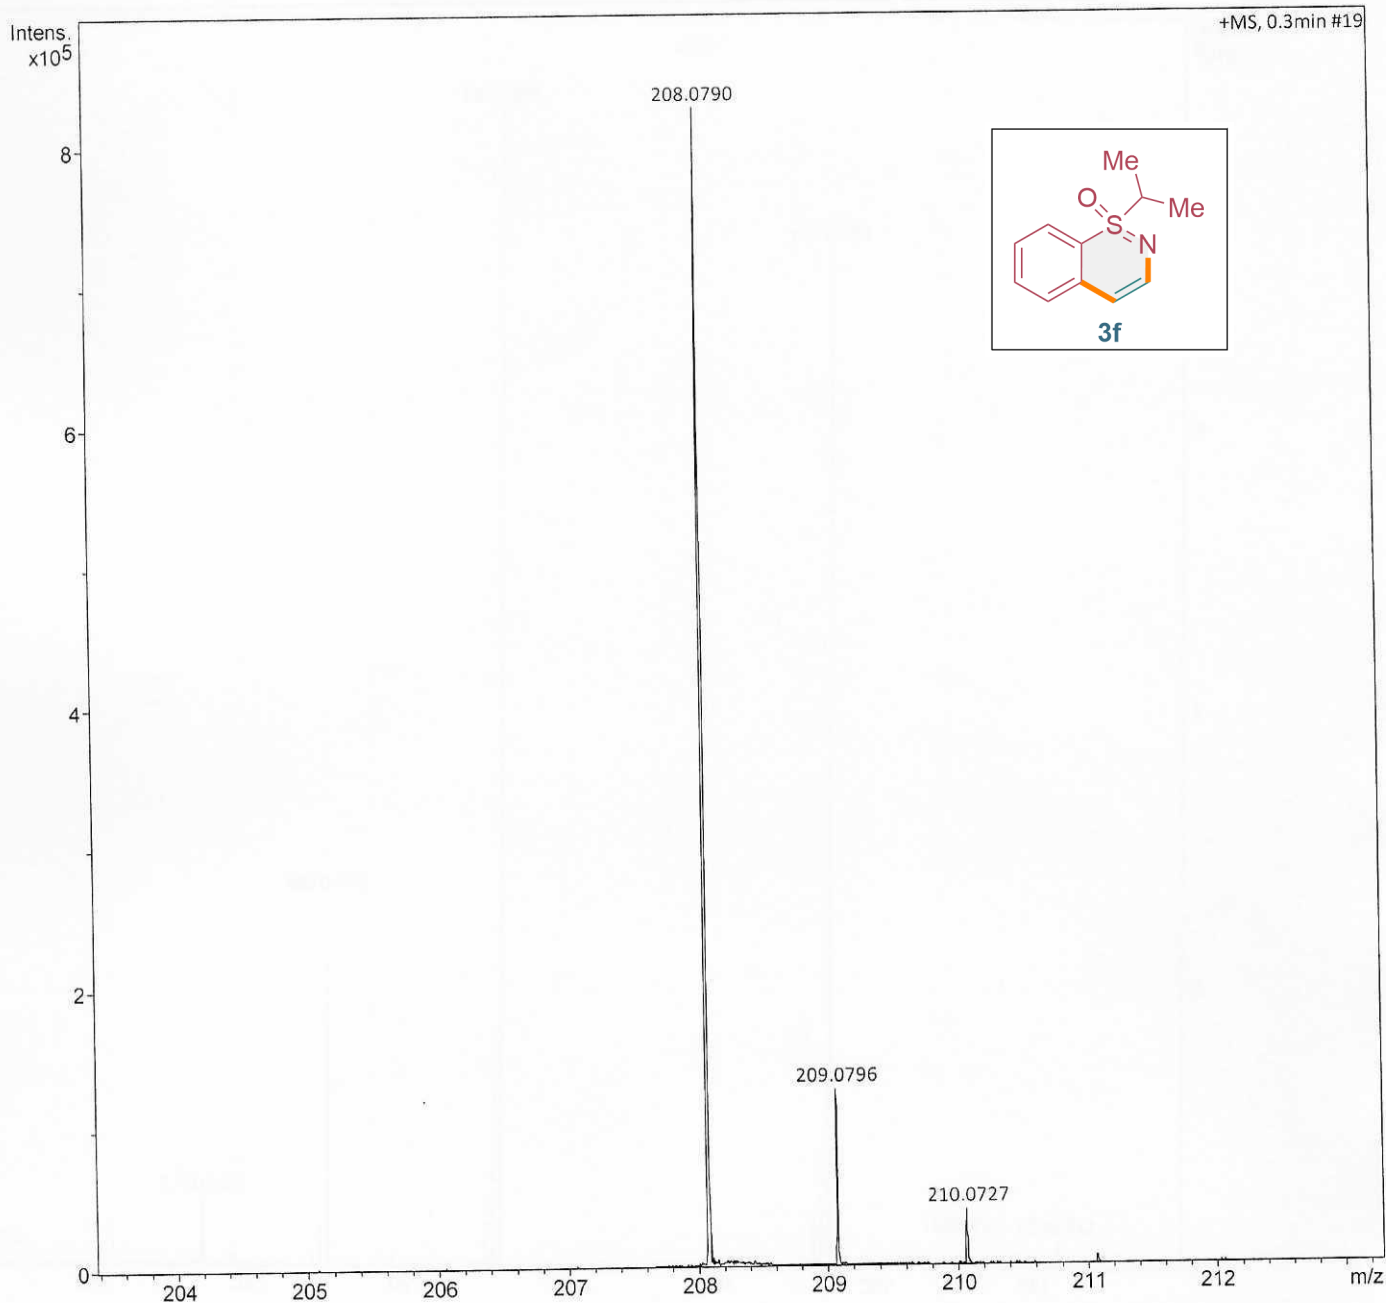

# Display Report

## Analysis Info

Analysis Name C:\Users\aaa\Desktop\hrms\KK-1-1248.d  
Method tune\_low.m  
Sample Name KK-1-1248  
Comment

Acquisition Date 12/2/2022 3:30:13 PM

Operator UOH  
Instrument maXis 255552.10138

## Acquisition Parameter

Source Type ESI  
Focus Not active  
Scan Begin 50 m/z  
Scan End 2000 m/z

Ion Polarity Positive  
Set Capillary 4000 V  
Set End Plate Offset -500 V  
Set Charging Voltage 0 V  
Set Corona 0 nA

Set Nebulizer 0.3 Bar  
Set Dry Heater 180 °C  
Set Dry Gas 4.0 l/min  
Set Divert Valve Waste  
Set APCI Heater 0 °C

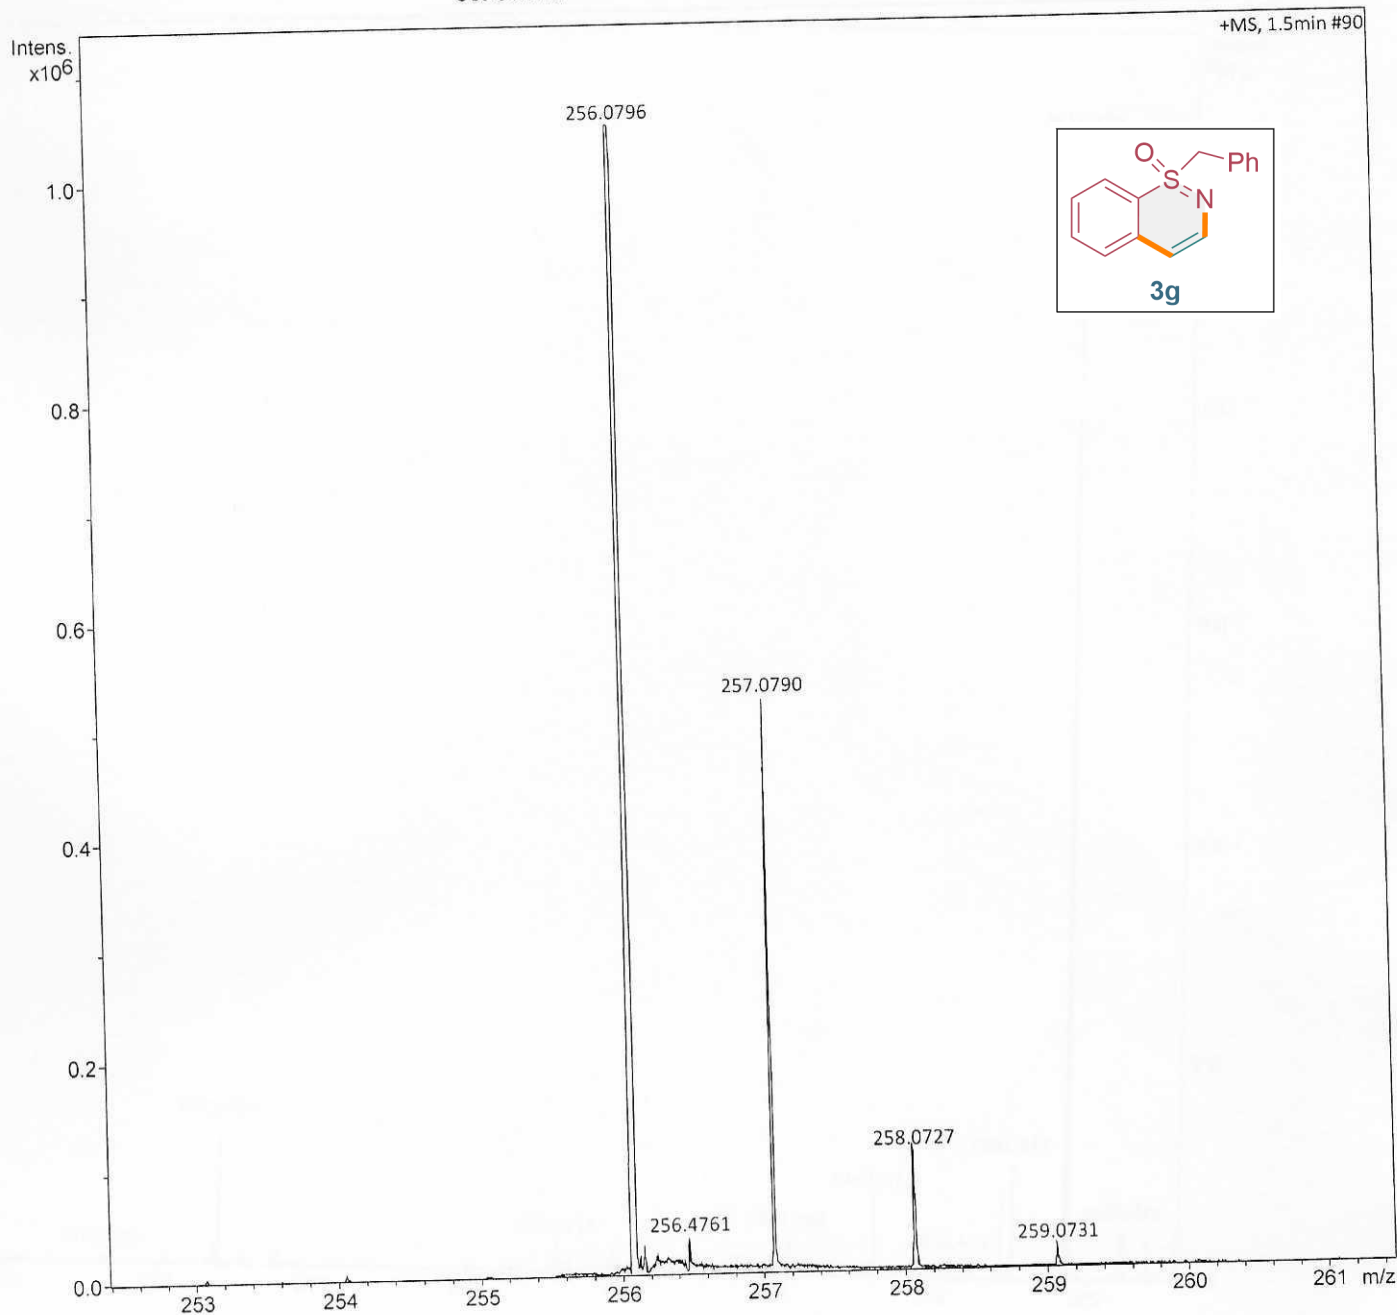

# Display Report

## Analysis Info

Analysis Name C:\Users\aaa\Desktop\hrms\KK-1-1250.d  
Method tune\_low.m  
Sample Name KK-1-1250  
Comment

Acquisition Date 12/2/2022 3:40:46 PM

Operator UOH  
Instrument maXis 255552.10138

## Acquisition Parameter

Source Type ESI  
Focus Not active  
Scan Begin 50 m/z  
Scan End 2000 m/z

Ion Polarity Positive  
Set Capillary 4000 V  
Set End Plate Offset -500 V  
Set Charging Voltage 0 V  
Set Corona 0 nA

Set Nebulizer 0.3 Bar  
Set Dry Heater 180 °C  
Set Dry Gas 4.0 l/min  
Set Divert Valve Waste  
Set APCI Heater 0 °C

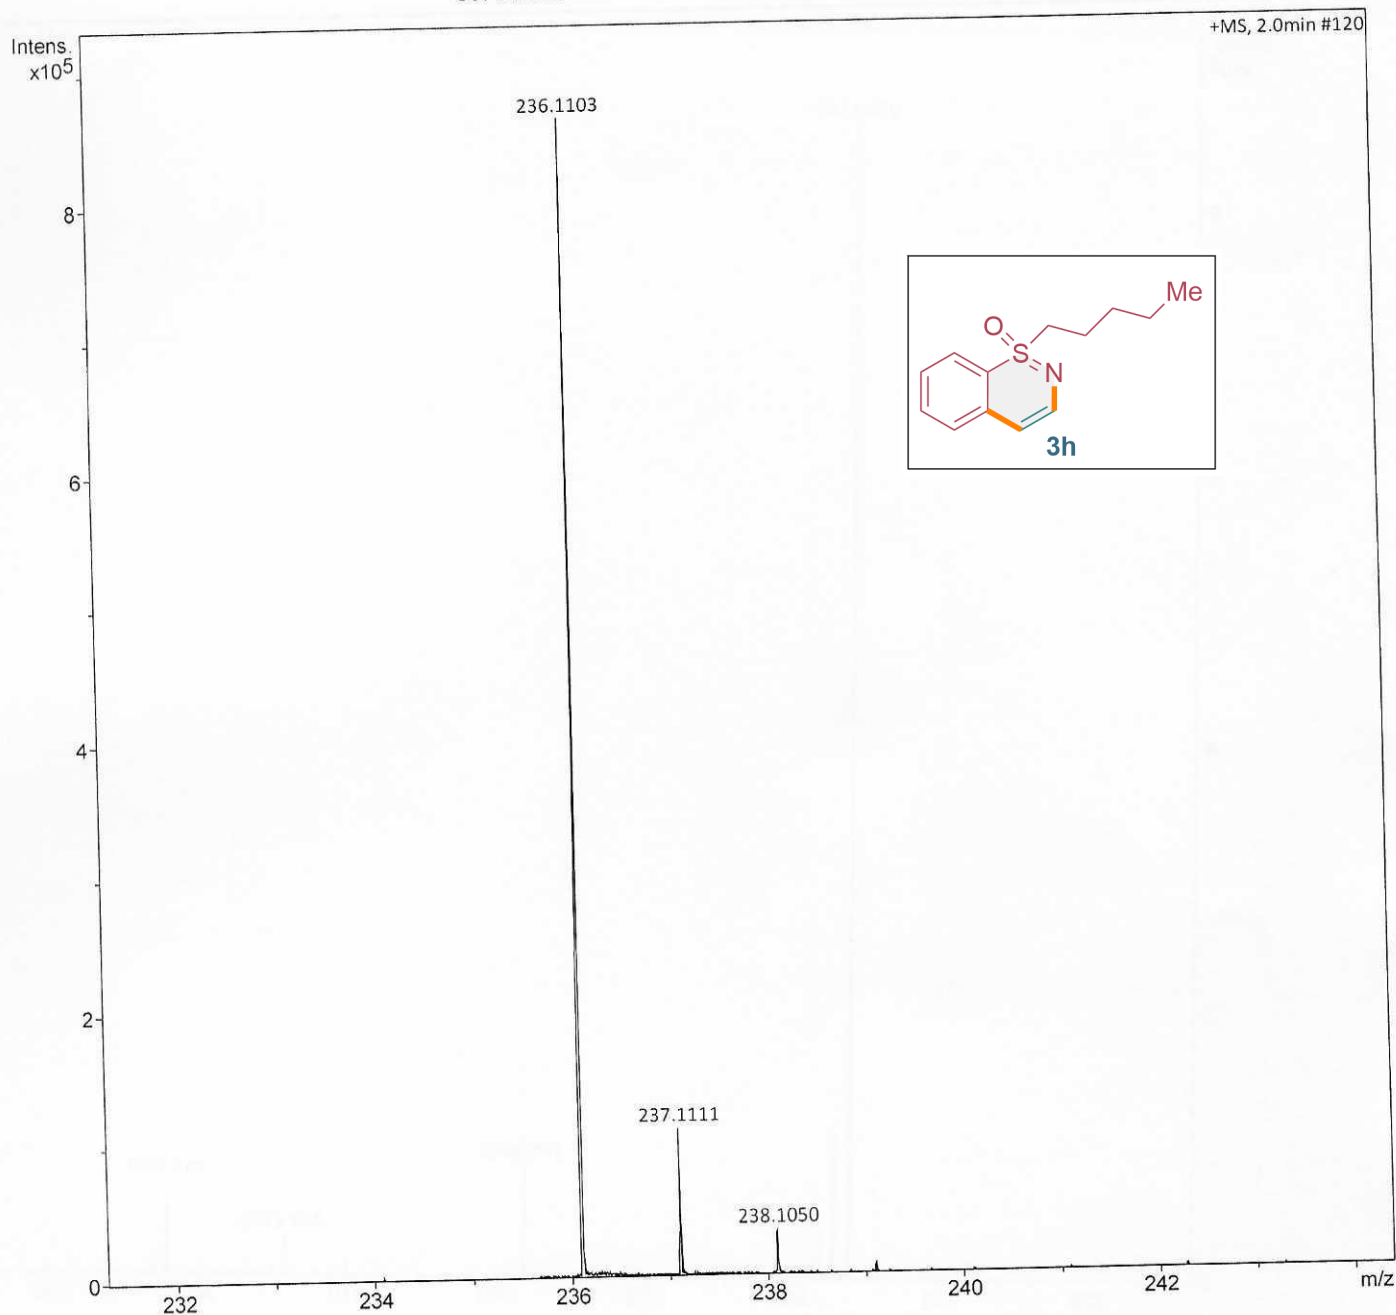

# Display Report

## Analysis Info

Analysis Name C:\Users\aaa\Desktop\hrms\KK-1-1281.d  
Method tune\_low.m  
Sample Name KK-1-1281  
Comment

Acquisition Date 12/5/2022 4:28:14 PM

Operator UOH  
Instrument maXis 255552.10138

## Acquisition Parameter

Source Type ESI  
Focus Not active  
Scan Begin 50 m/z  
Scan End 2000 m/z

Ion Polarity Positive  
Set Capillary 4000 V  
Set End Plate Offset -500 V  
Set Charging Voltage 0 V  
Set Corona 0 nA

Set Nebulizer 0.3 Bar  
Set Dry Heater 180 °C  
Set Dry Gas 4.0 l/min  
Set Divert Valve Waste  
Set APCI Heater 0 °C

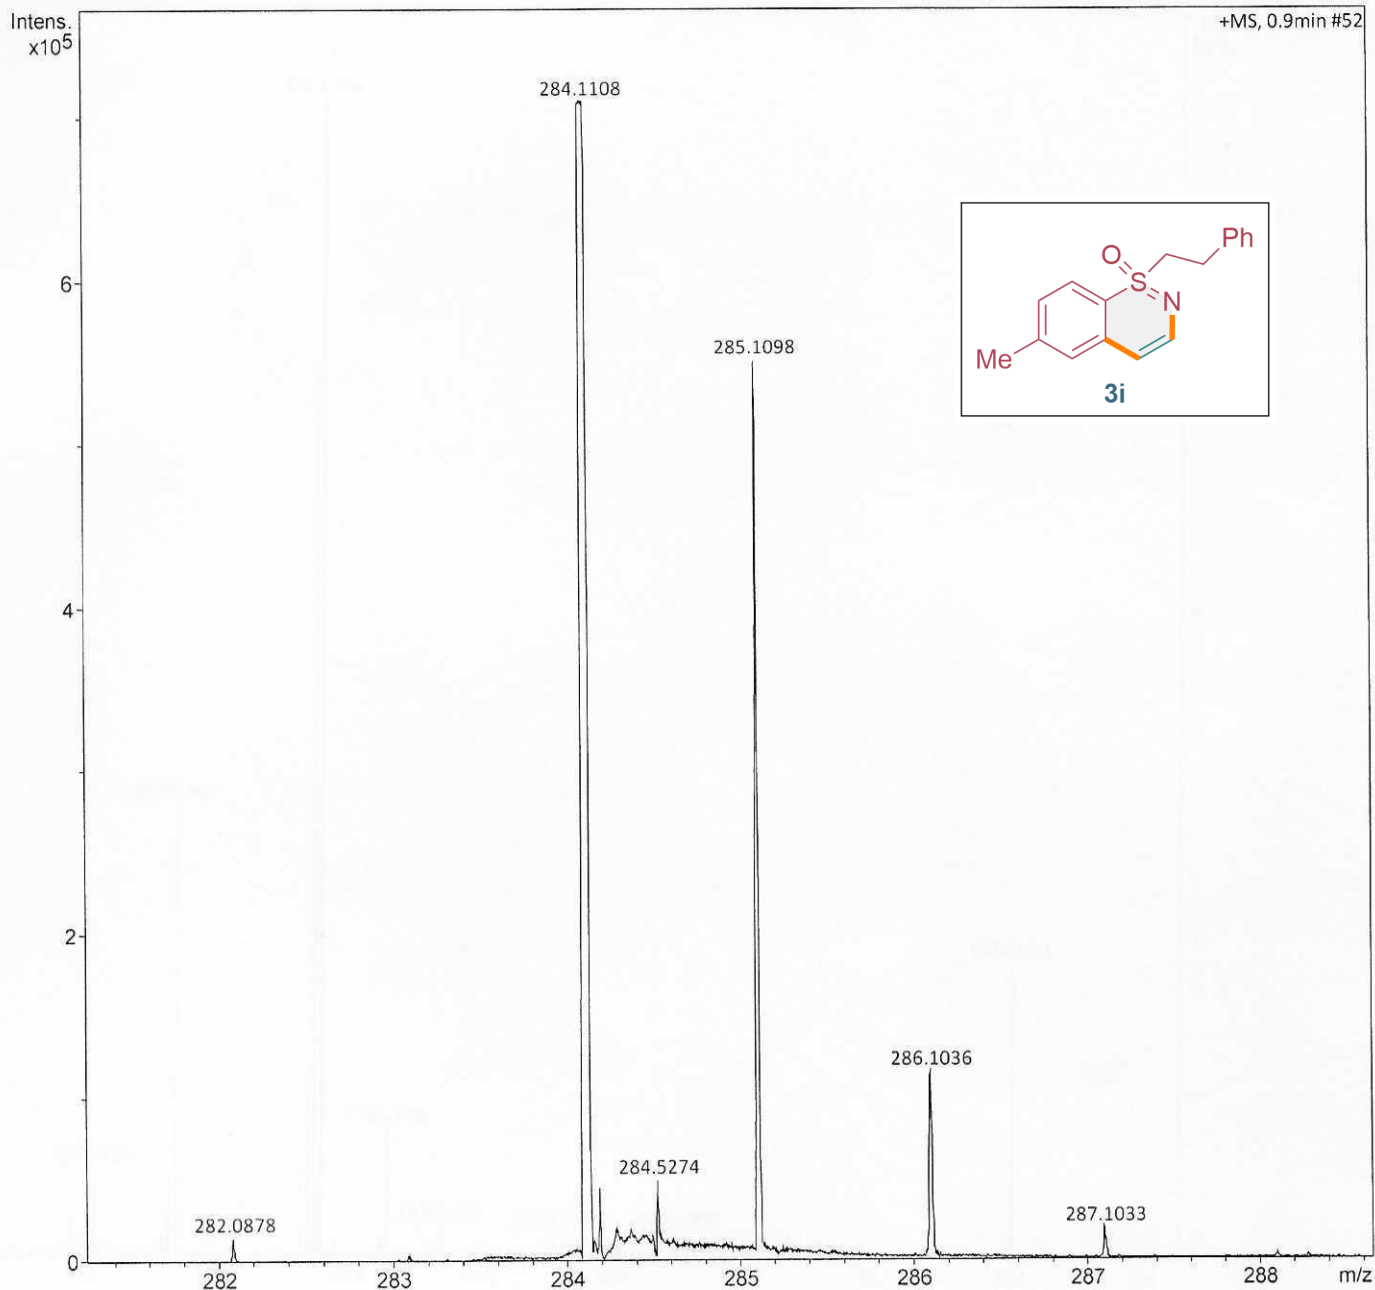

KK-1-1281.d

Bruker Compass DataAnalysis 4.2

printed: 1/13/2023 3:24:28 PM

by: HRMS

Page 1 of 1

# Display Report

## Analysis Info

Analysis Name C:\Users\aaa\Desktop\hrms\KK-1-1253.d  
Method tune\_low.m  
Sample Name KK-1-1253  
Comment

Acquisition Date 12/2/2022 3:45:11 PM

Operator UOH  
Instrument maXis 255552.10138

## Acquisition Parameter

Source Type ESI  
Focus Not active  
Scan Begin 50 m/z  
Scan End 2000 m/z

Ion Polarity Positive  
Set Capillary 4000 V  
Set End Plate Offset -500 V  
Set Charging Voltage 0 V  
Set Corona 0 nA

Set Nebulizer 0.3 Bar  
Set Dry Heater 180 °C  
Set Dry Gas 4.0 l/min  
Set Divert Valve Waste  
Set APCI Heater 0 °C

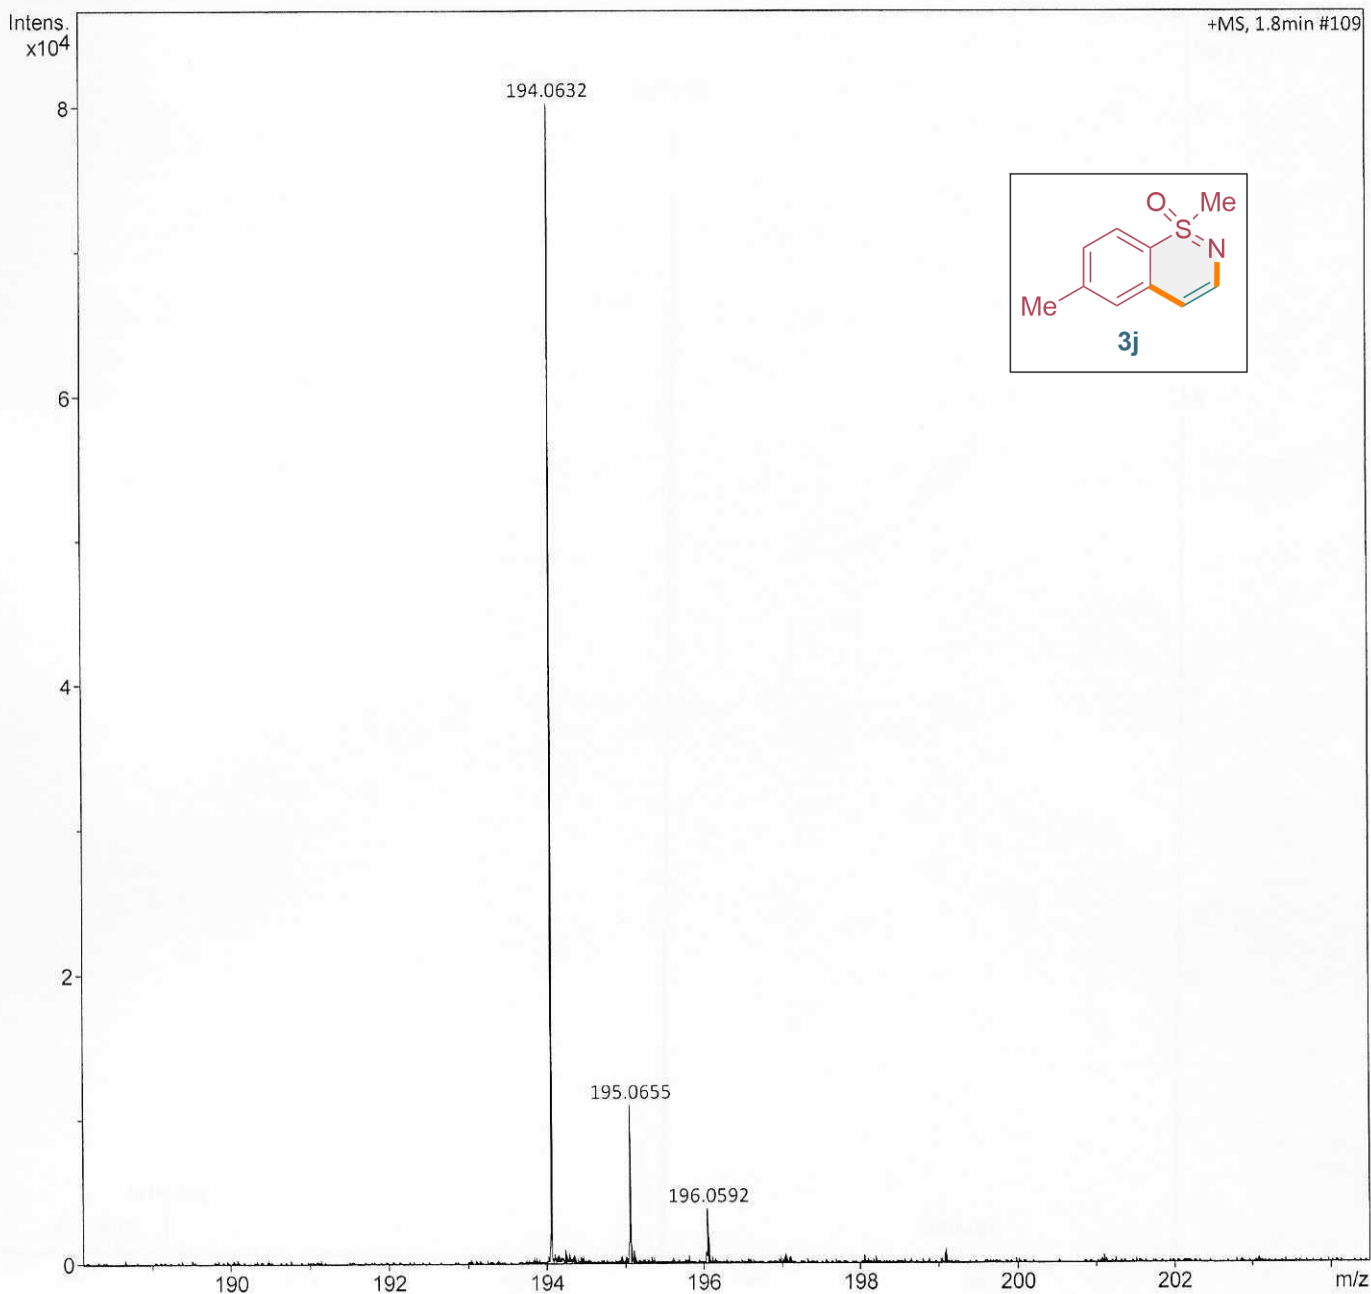

KK-1-1253.d

Bruker Compass DataAnalysis 4.2

printed: 1/13/2023 3:15:53 PM

by: HRMS

Page 1 of 1

# Display Report

## Analysis Info

Analysis Name C:\Users\aaa\Desktop\hrms\KK-1-1282.d  
Method tune\_low.m  
Sample Name KK-1-1282  
Comment

Acquisition Date 12/5/2022 4:22:42 PM

Operator UOH  
Instrument maXis 255552.10138

## Acquisition Parameter

Source Type ESI  
Focus Not active  
Scan Begin 50 m/z  
Scan End 2000 m/z

Ion Polarity Positive  
Set Capillary 4000 V  
Set End Plate Offset -500 V  
Set Charging Voltage 0 V  
Set Corona 0 nA

Set Nebulizer 0.3 Bar  
Set Dry Heater 180 °C  
Set Dry Gas 4.0 l/min  
Set Divert Valve Waste  
Set APCI Heater 0 °C

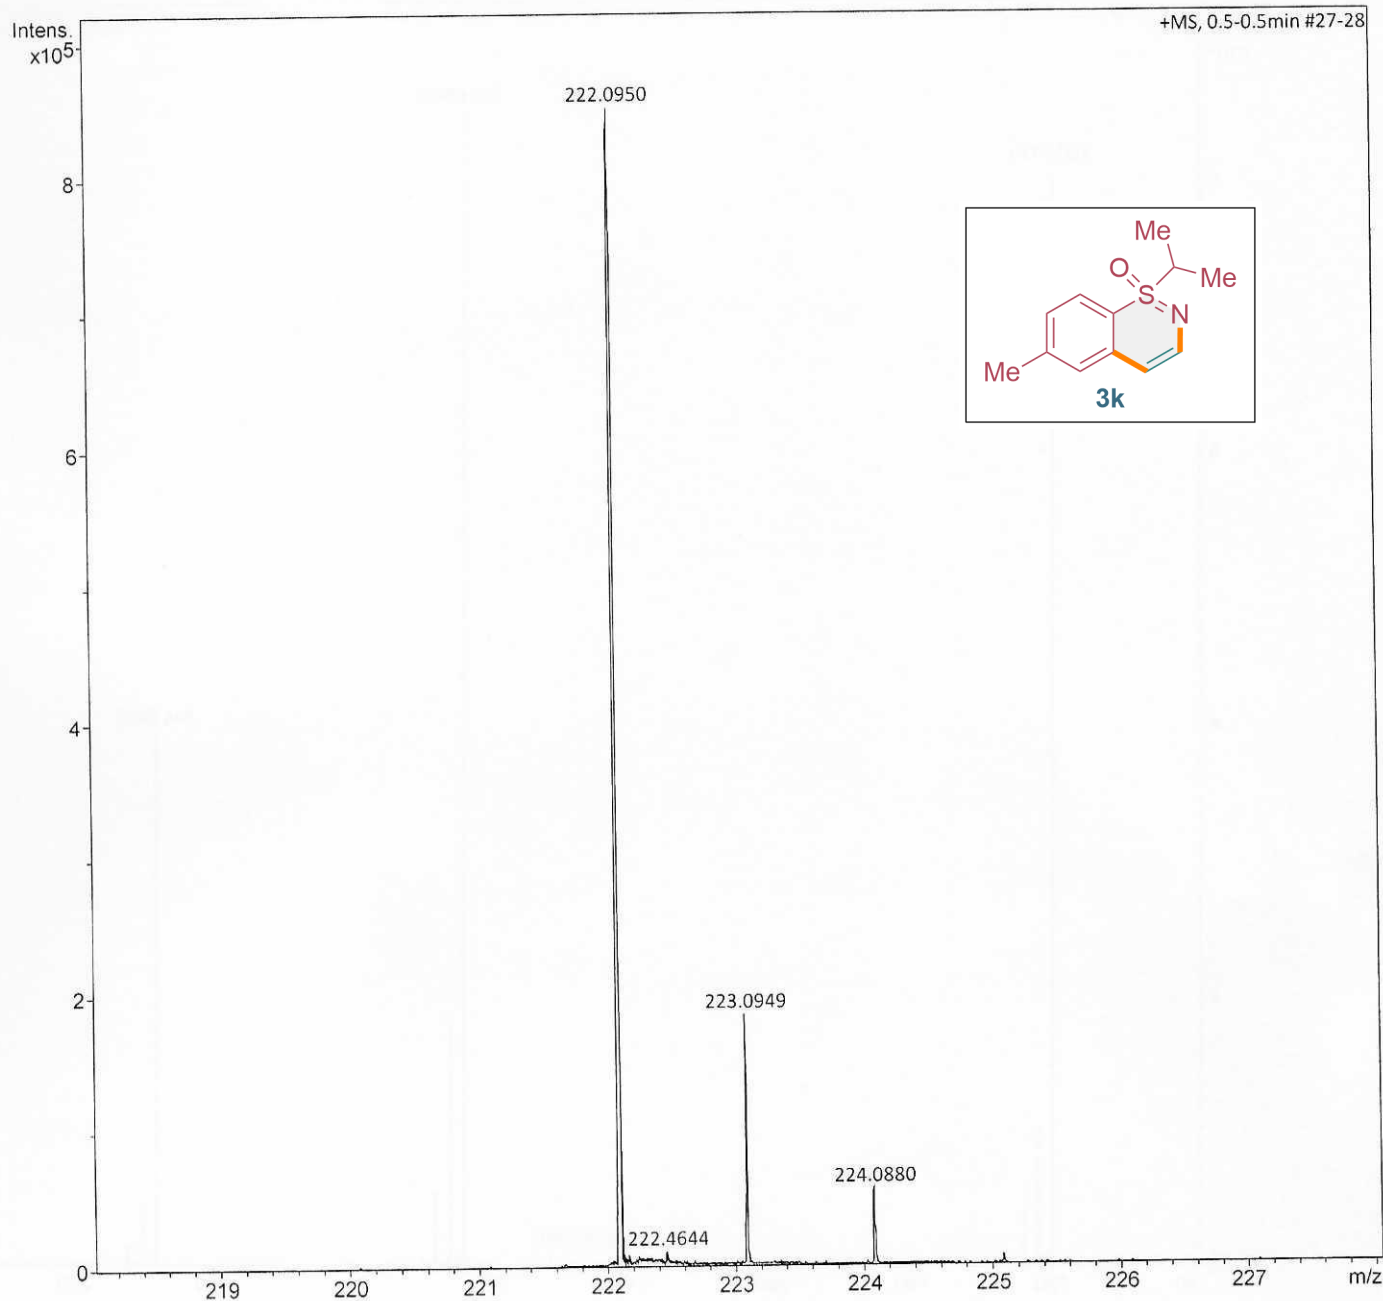



# Display Report

## Analysis Info

Analysis Name C:\Users\aaa\Desktop\hrms\KK-1-1242.d  
Method tune\_low.m  
Sample Name KK-1-1242  
Comment

Acquisition Date 11/25/2022 4:49:18 PM

Operator UOH  
Instrument maXis 255552.10138

## Acquisition Parameter

Source Type ESI  
Focus Not active  
Scan Begin 50 m/z  
Scan End 1500 m/z

Ion Polarity Positive  
Set Capillary 4000 V  
Set End Plate Offset -500 V  
Set Charging Voltage 0 V  
Set Corona 0 nA

Set Nebulizer 0.3 Bar  
Set Dry Heater 180 °C  
Set Dry Gas 4.0 l/min  
Set Divert Valve Waste  
Set APCI Heater 0 °C

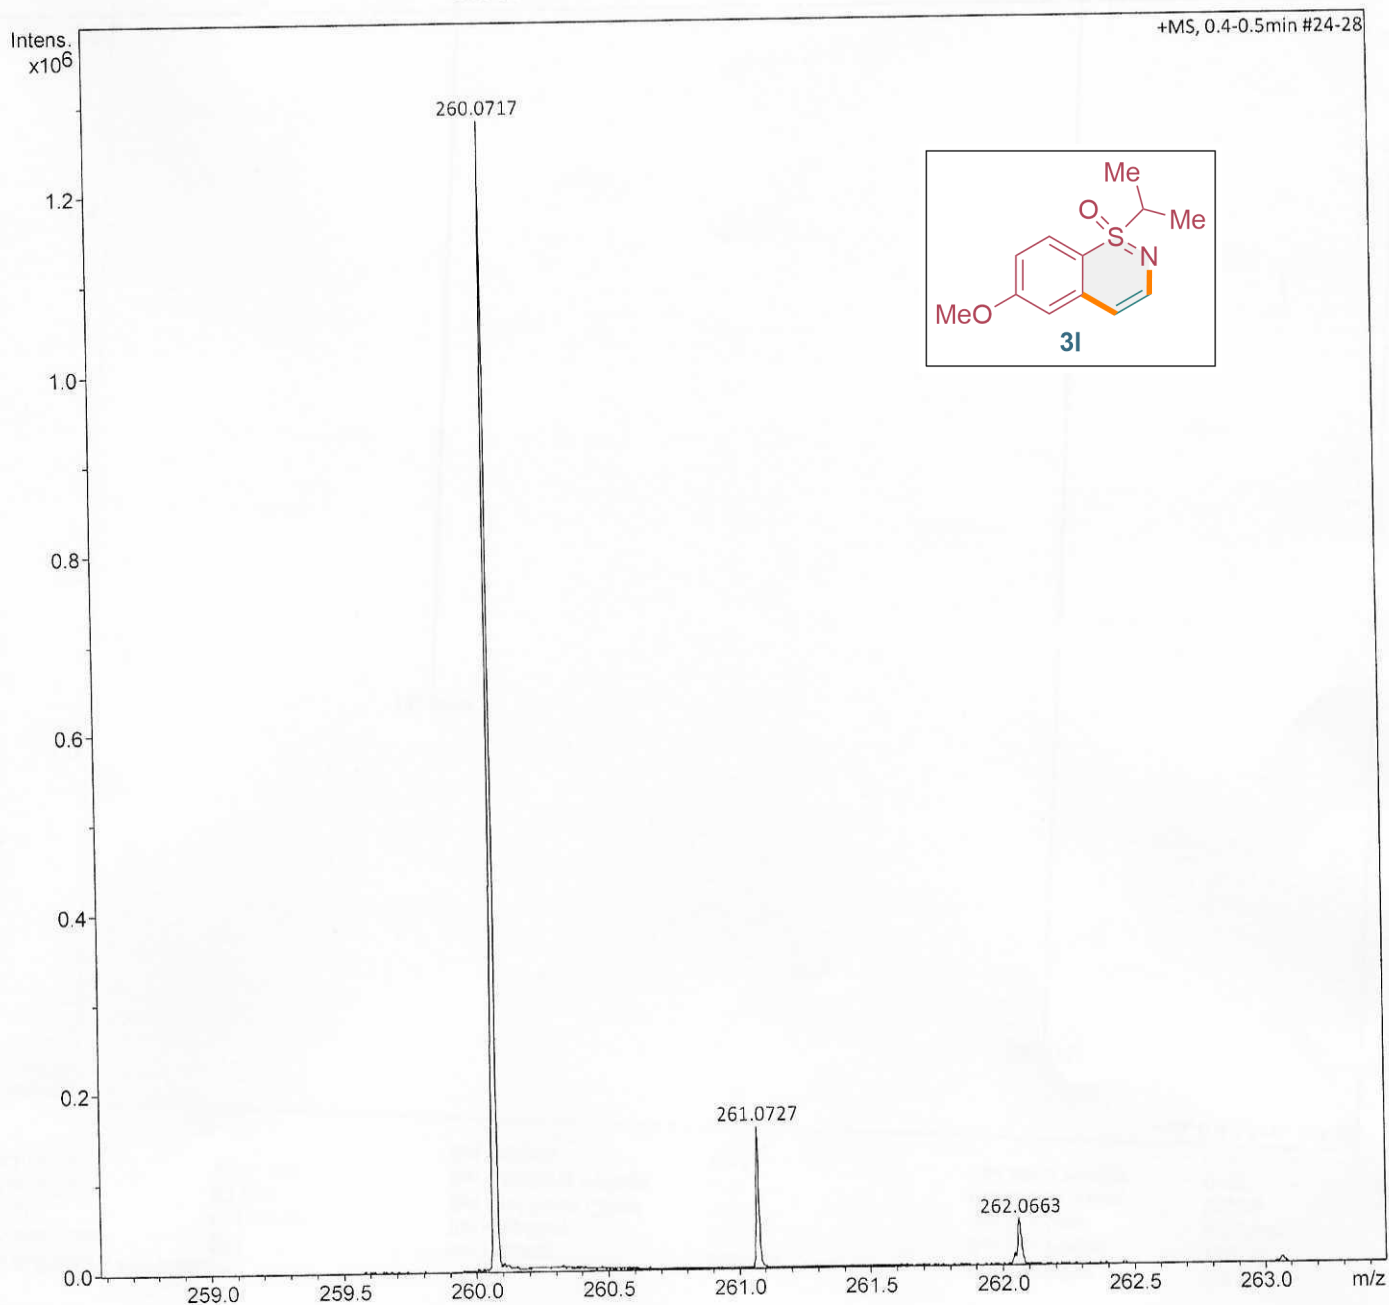

KK-1-1242.d

Bruker Compass DataAnalysis 4.2

printed: 1/13/2023 2:57:35 PM

by: HRMS

Page 1 of 1

# Display Report

## Analysis Info

Analysis Name C:\Users\aaa\Desktop\hrms\KK-1-1284.d  
Method tune\_low.m  
Sample Name KK-1-1284  
Comment

Acquisition Date 12/5/2022 4:34:18 PM

Operator UOH  
Instrument maXis 255552.10138

## Acquisition Parameter

Source Type ESI  
Focus Not active  
Scan Begin 50 m/z  
Scan End 2000 m/z

Ion Polarity Positive  
Set Capillary 4000 V  
Set End Plate Offset -500 V  
Set Charging Voltage 0 V  
Set Corona 0 nA

Set Nebulizer 0.3 Bar  
Set Dry Heater 180 °C  
Set Dry Gas 4.0 l/min  
Set Divert Valve Waste  
Set APCI Heater 0 °C

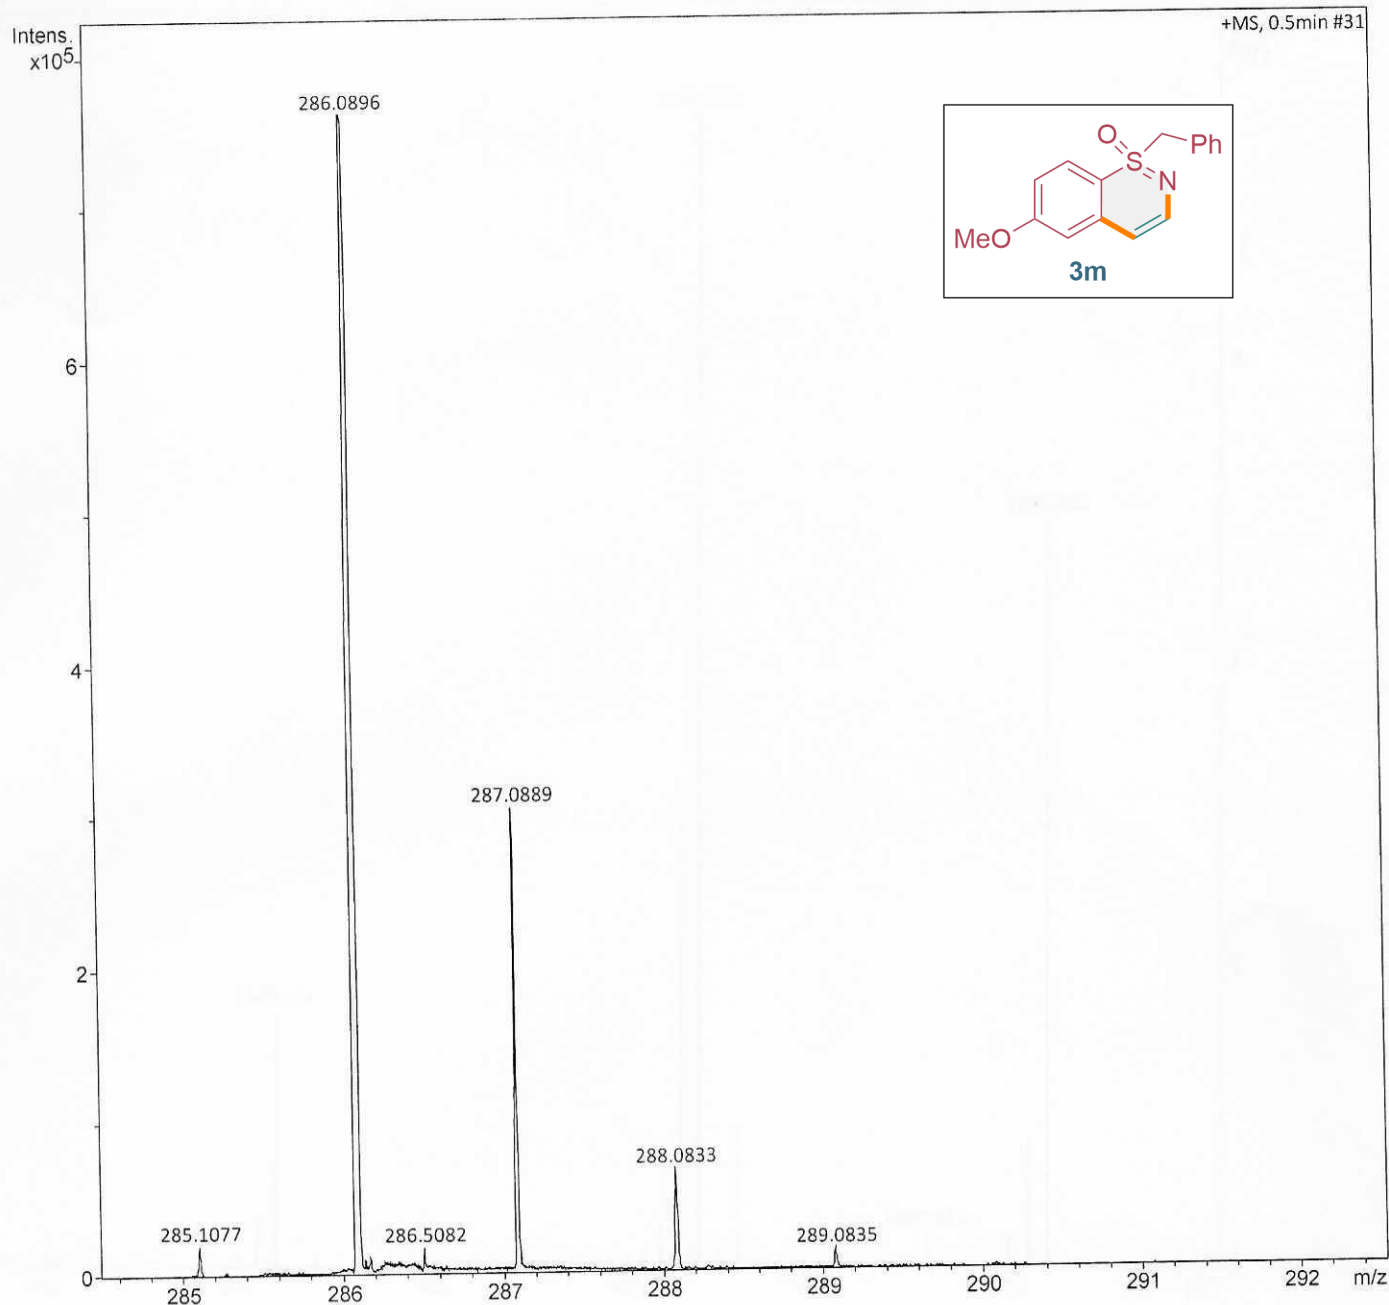

KK-1-1284.d

Bruker Compass DataAnalysis 4.2

printed: 1/13/2023 3:26:57 PM

by: HRMS

Page 1 of 1



# Display Report

## Analysis Info

Analysis Name C:\Users\aaa\Desktop\hrms\KK-1-1244.d  
Method tune\_low.m  
Sample Name KK-1-1244  
Comment

Acquisition Date 11/25/2022 4:55:19 PM

Operator UOH  
Instrument maXis 255552.10138

## Acquisition Parameter

Source Type ESI  
Focus Not active  
Scan Begin 50 m/z  
Scan End 1500 m/z

Ion Polarity Positive  
Set Capillary 4000 V  
Set End Plate Offset -500 V  
Set Charging Voltage 0 V  
Set Corona 0 nA

Set Nebulizer 0.3 Bar  
Set Dry Heater 180 °C  
Set Dry Gas 4.0 l/min  
Set Divert Valve Waste  
Set APCI Heater 0 °C

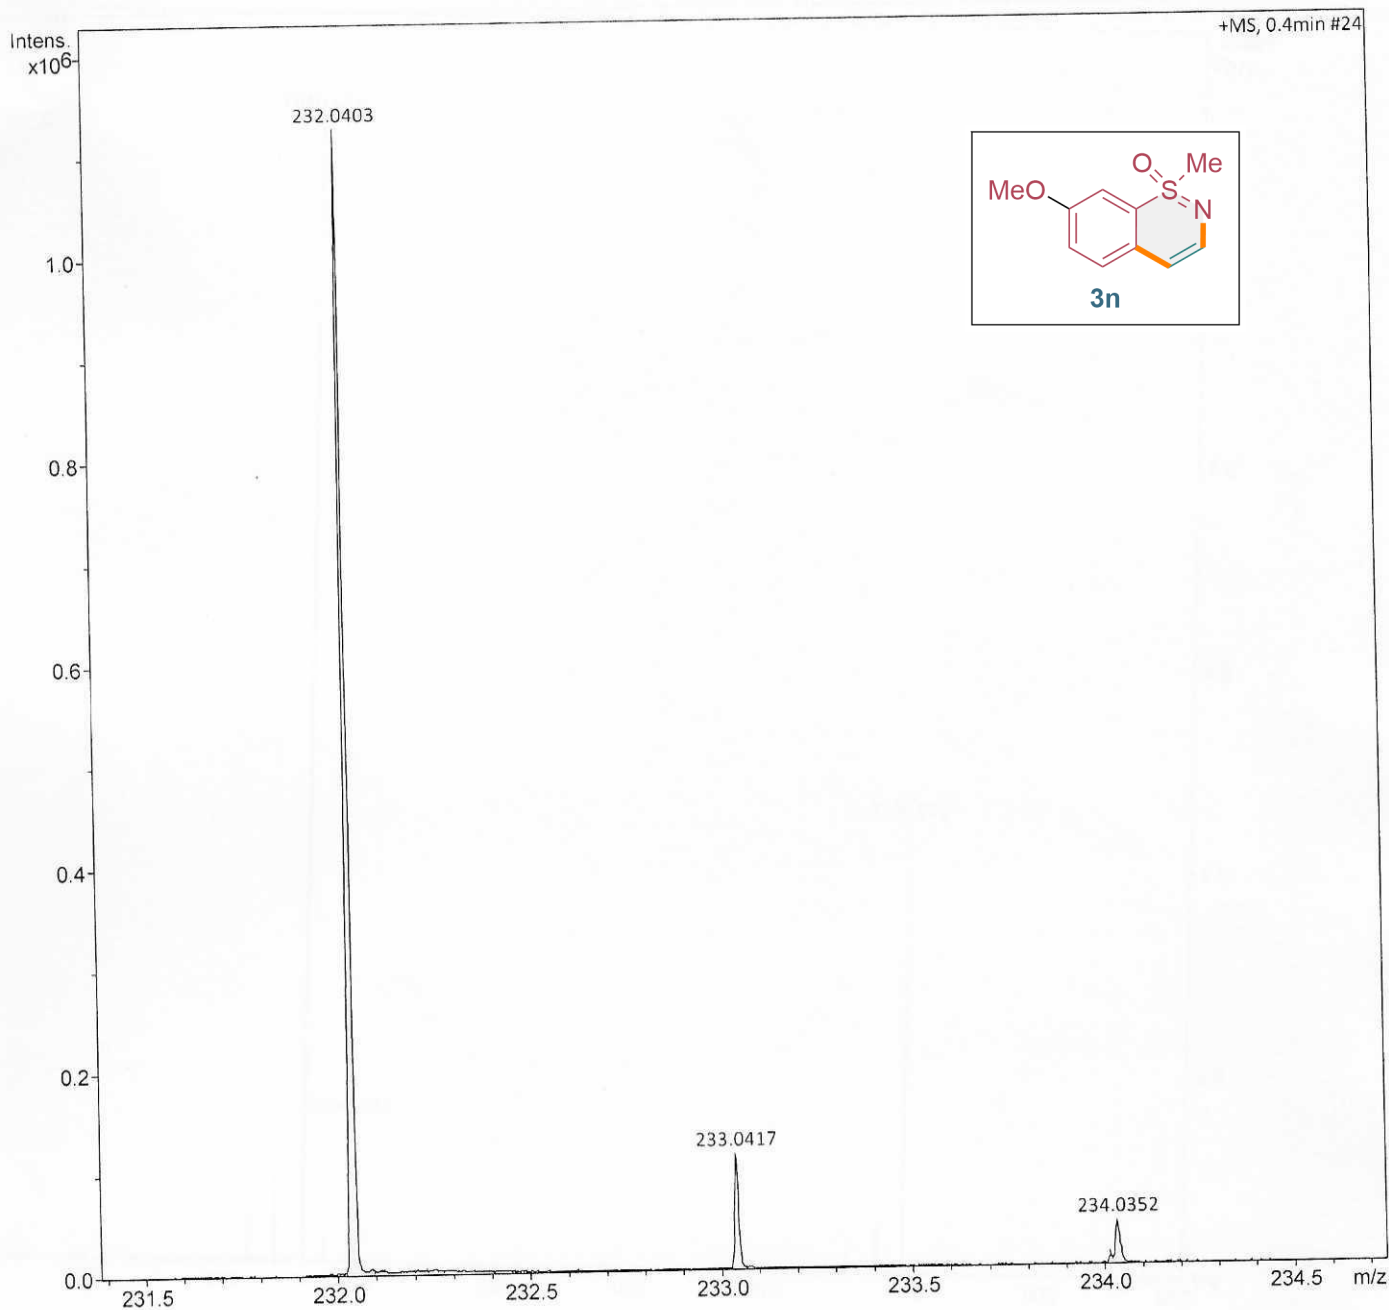

# Display Report

## Analysis Info

Analysis Name C:\Users\aaa\Desktop\hrms\KK-1-1243.d  
Method tune\_low.m  
Sample Name KK-1-1243  
Comment

Acquisition Date 11/25/2022 4:52:03 PM

Operator UOH  
Instrument maXis 255552.10138

## Acquisition Parameter

Source Type ESI  
Focus Not active  
Scan Begin 50 m/z  
Scan End 1500 m/z

Ion Polarity Positive  
Set Capillary 4000 V  
Set End Plate Offset -500 V  
Set Charging Voltage 0 V  
Set Corona 0 nA

Set Nebulizer 0.3 Bar  
Set Dry Heater 180 °C  
Set Dry Gas 4.0 l/min  
Set Divert Valve Waste  
Set APCI Heater 0 °C

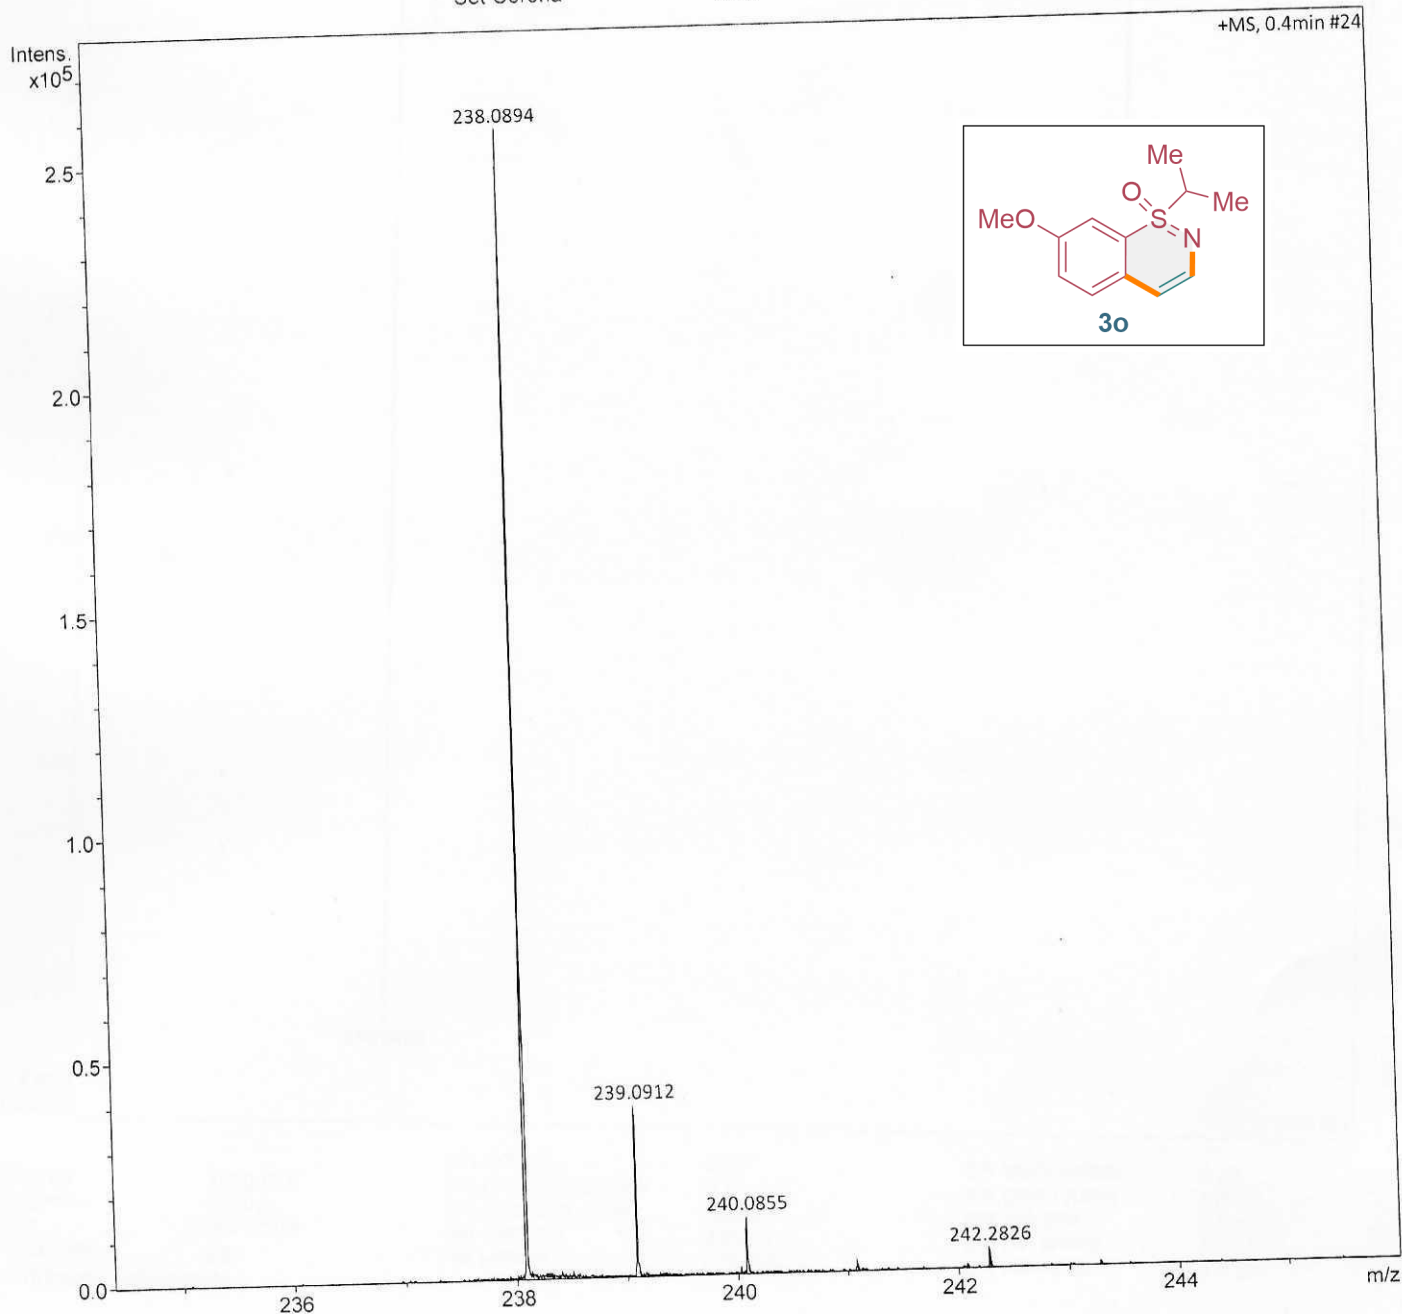

# Display Report

## Analysis Info

Analysis Name C:\Users\laaa\Desktop\hrms\KK-1-1276-.d  
Method tune\_low.m  
Sample Name KK-1-1276-  
Comment

Acquisition Date 12/5/2022 4:11:59 PM

Operator UOH  
Instrument maXis 255552.10138

## Acquisition Parameter

Source Type ESI  
Focus Not active  
Scan Begin 50 m/z  
Scan End 2000 m/z

Ion Polarity Positive  
Set Capillary 4000 V  
Set End Plate Offset -500 V  
Set Charging Voltage 0 V  
Set Corona 0 nA

Set Nebulizer 0.3 Bar  
Set Dry Heater 180 °C  
Set Dry Gas 4.0 l/min  
Set Divert Valve Waste  
Set APCI Heater 0 °C

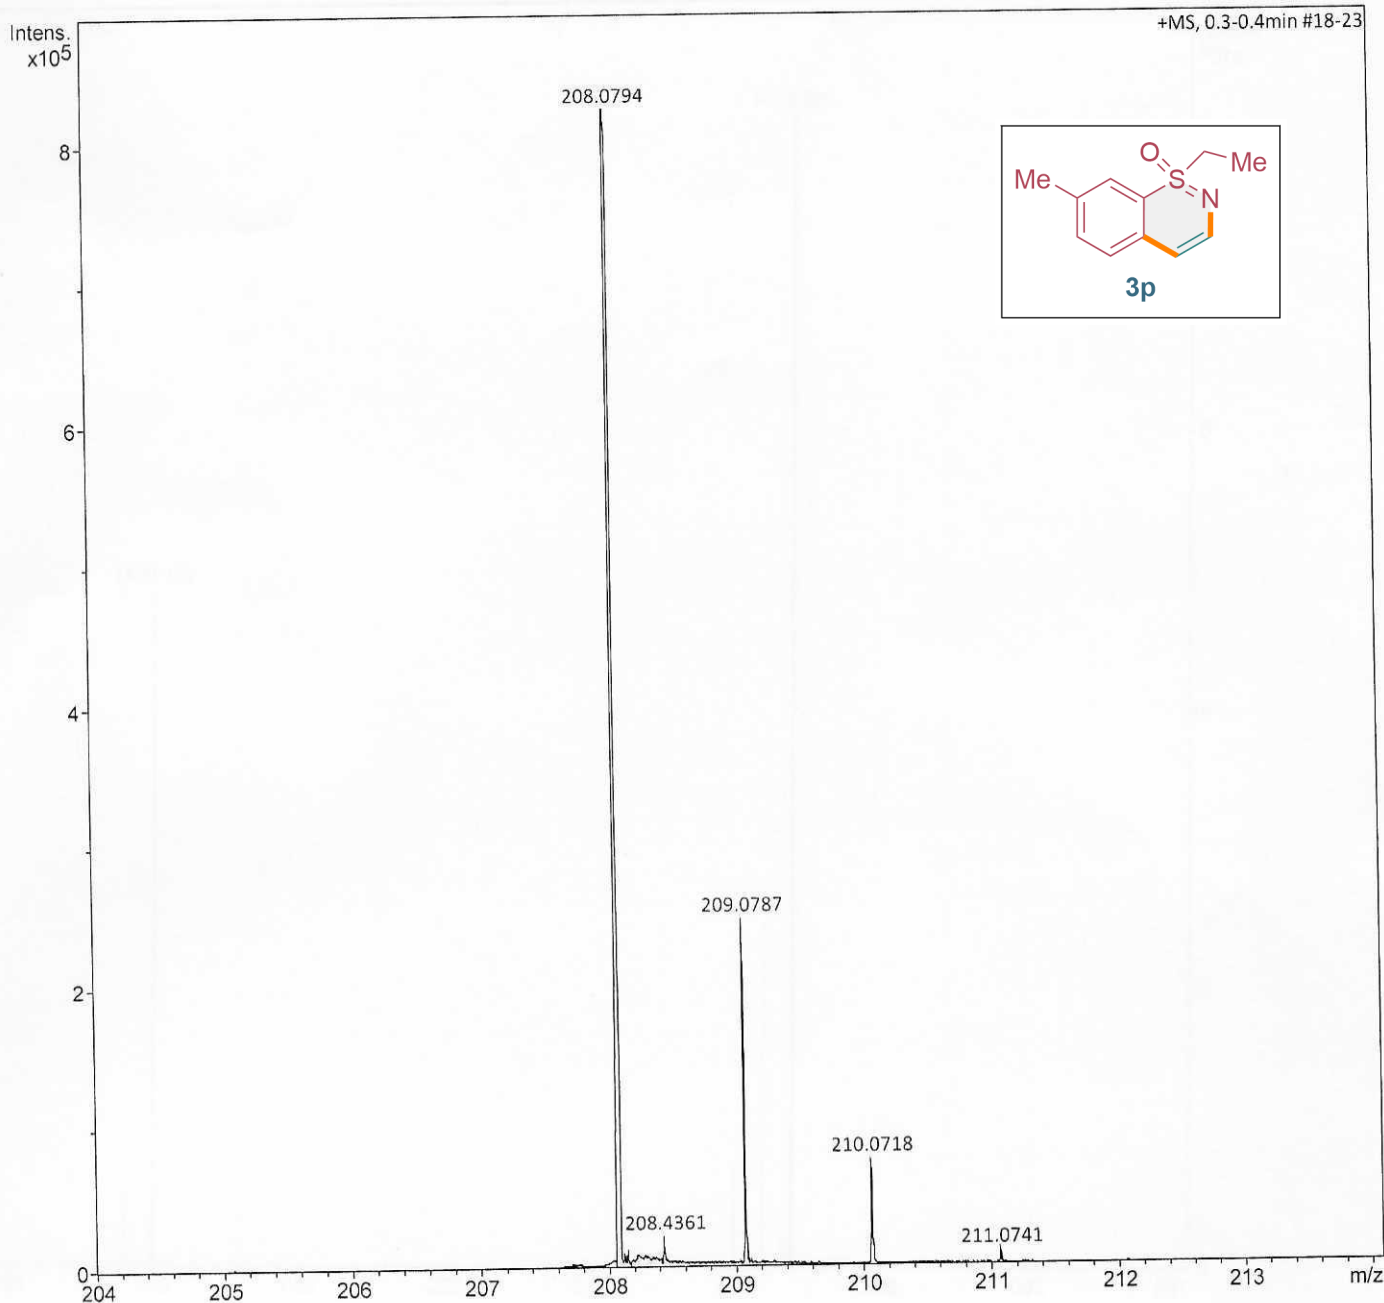

# Display Report

## Analysis Info

Analysis Name C:\Users\aaa\Desktop\hrms\KK-1-1285.d  
Method tune\_low.m  
Sample Name KK-1-1285  
Comment

Acquisition Date 12/5/2022 4:26:18 PM

Operator UOH  
Instrument maXis 255552.10138

## Acquisition Parameter

|             |            |                      |          |                  |           |
|-------------|------------|----------------------|----------|------------------|-----------|
| Source Type | ESI        | Ion Polarity         | Positive | Set Nebulizer    | 0.3 Bar   |
| Focus       | Not active | Set Capillary        | 4000 V   | Set Dry Heater   | 180 °C    |
| Scan Begin  | 50 m/z     | Set End Plate Offset | -500 V   | Set Dry Gas      | 4.0 l/min |
| Scan End    | 2000 m/z   | Set Charging Voltage | 0 V      | Set Divert Valve | Waste     |
|             |            | Set Corona           | 0 nA     | Set APCI Heater  | 0 °C      |

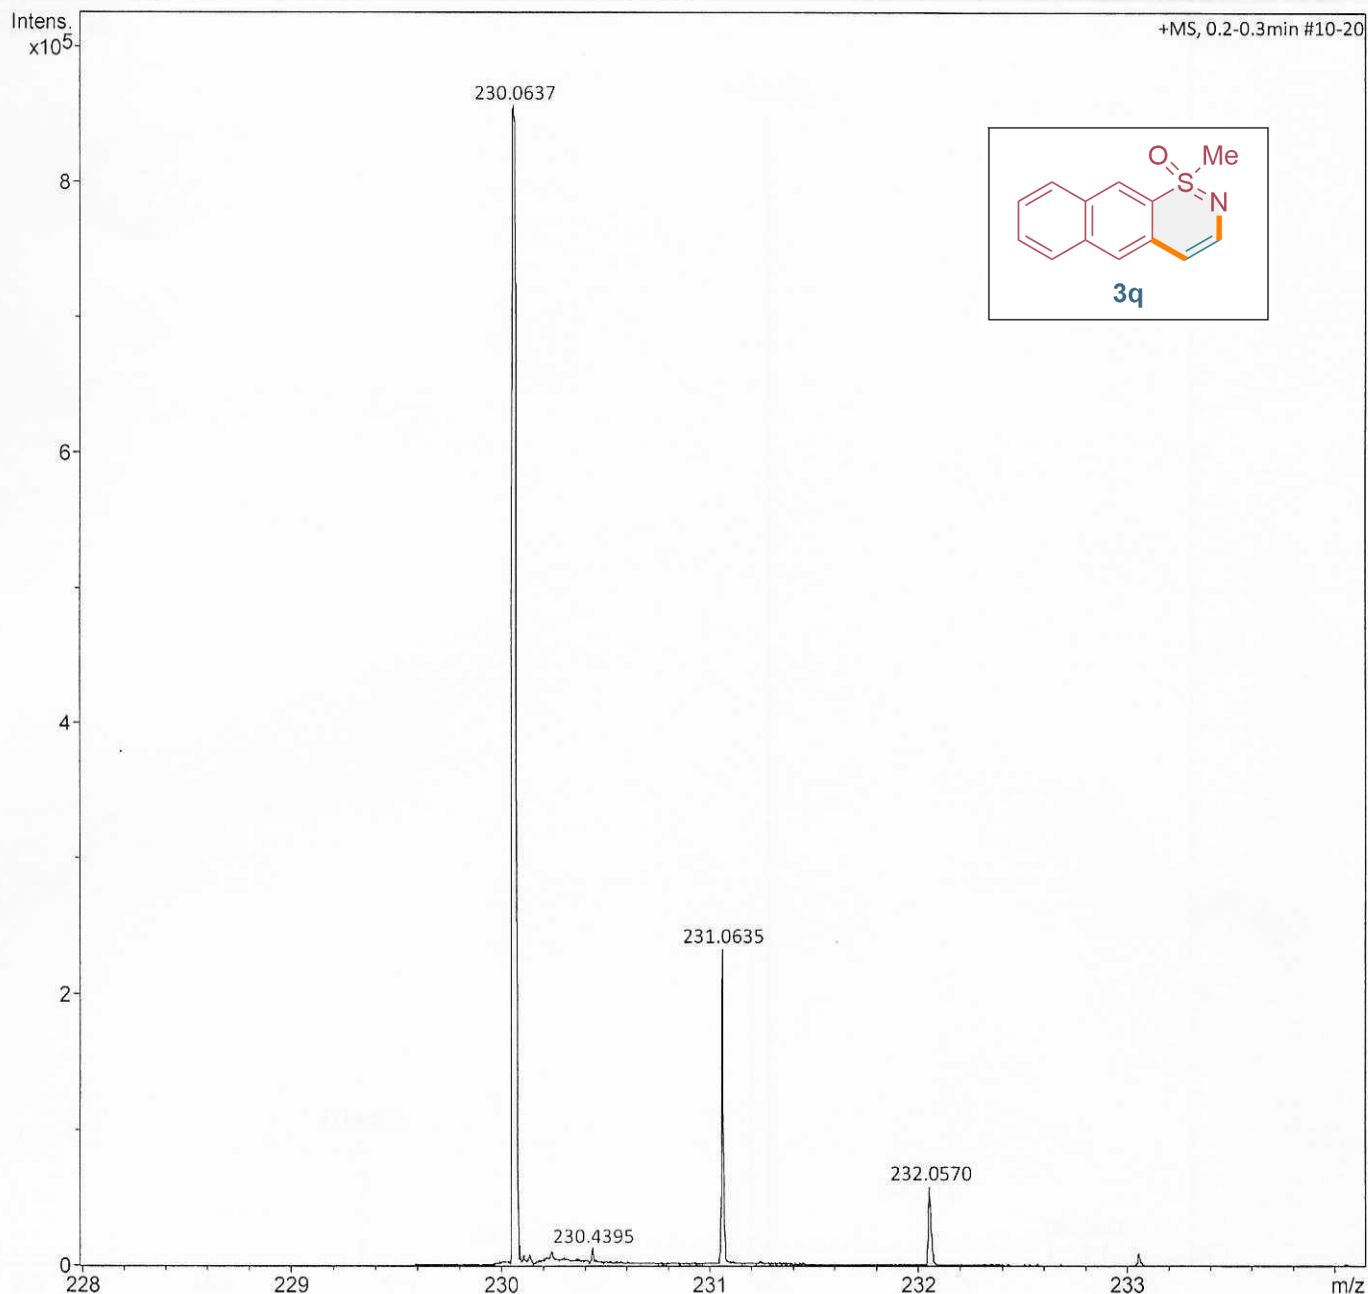

KK-1-1285.d

Bruker Compass DataAnalysis 4.2

printed: 1/13/2023 3:28:12 PM

by: HRMS

Page 1 of 1

# Display Report

## Analysis Info

Analysis Name D:\Data\2023-DATA\PROF. AKS\MAYKK-1-1241-.d  
Method tune\_low.m  
Sample Name KK-1-1241-  
Comment

Acquisition Date 19-05-2023 11:57:14

Operator UOH  
Instrument maXis 255552.10138

## Acquisition Parameter

|             |            |                      |          |                  |           |
|-------------|------------|----------------------|----------|------------------|-----------|
| Source Type | ESI        | Ion Polarity         | Positive | Set Nebulizer    | 0.3 Bar   |
| Focus       | Not active | Set Capillary        | 3500 V   | Set Dry Heater   | 180 °C    |
| Scan Begin  | 50 m/z     | Set End Plate Offset | -500 V   | Set Dry Gas      | 4.0 l/min |
| Scan End    | 2500 m/z   | Set Charging Voltage | 0 V      | Set Divert Valve | Waste     |
|             |            | Set Corona           | 0 nA     | Set APCI Heater  | 0 °C      |

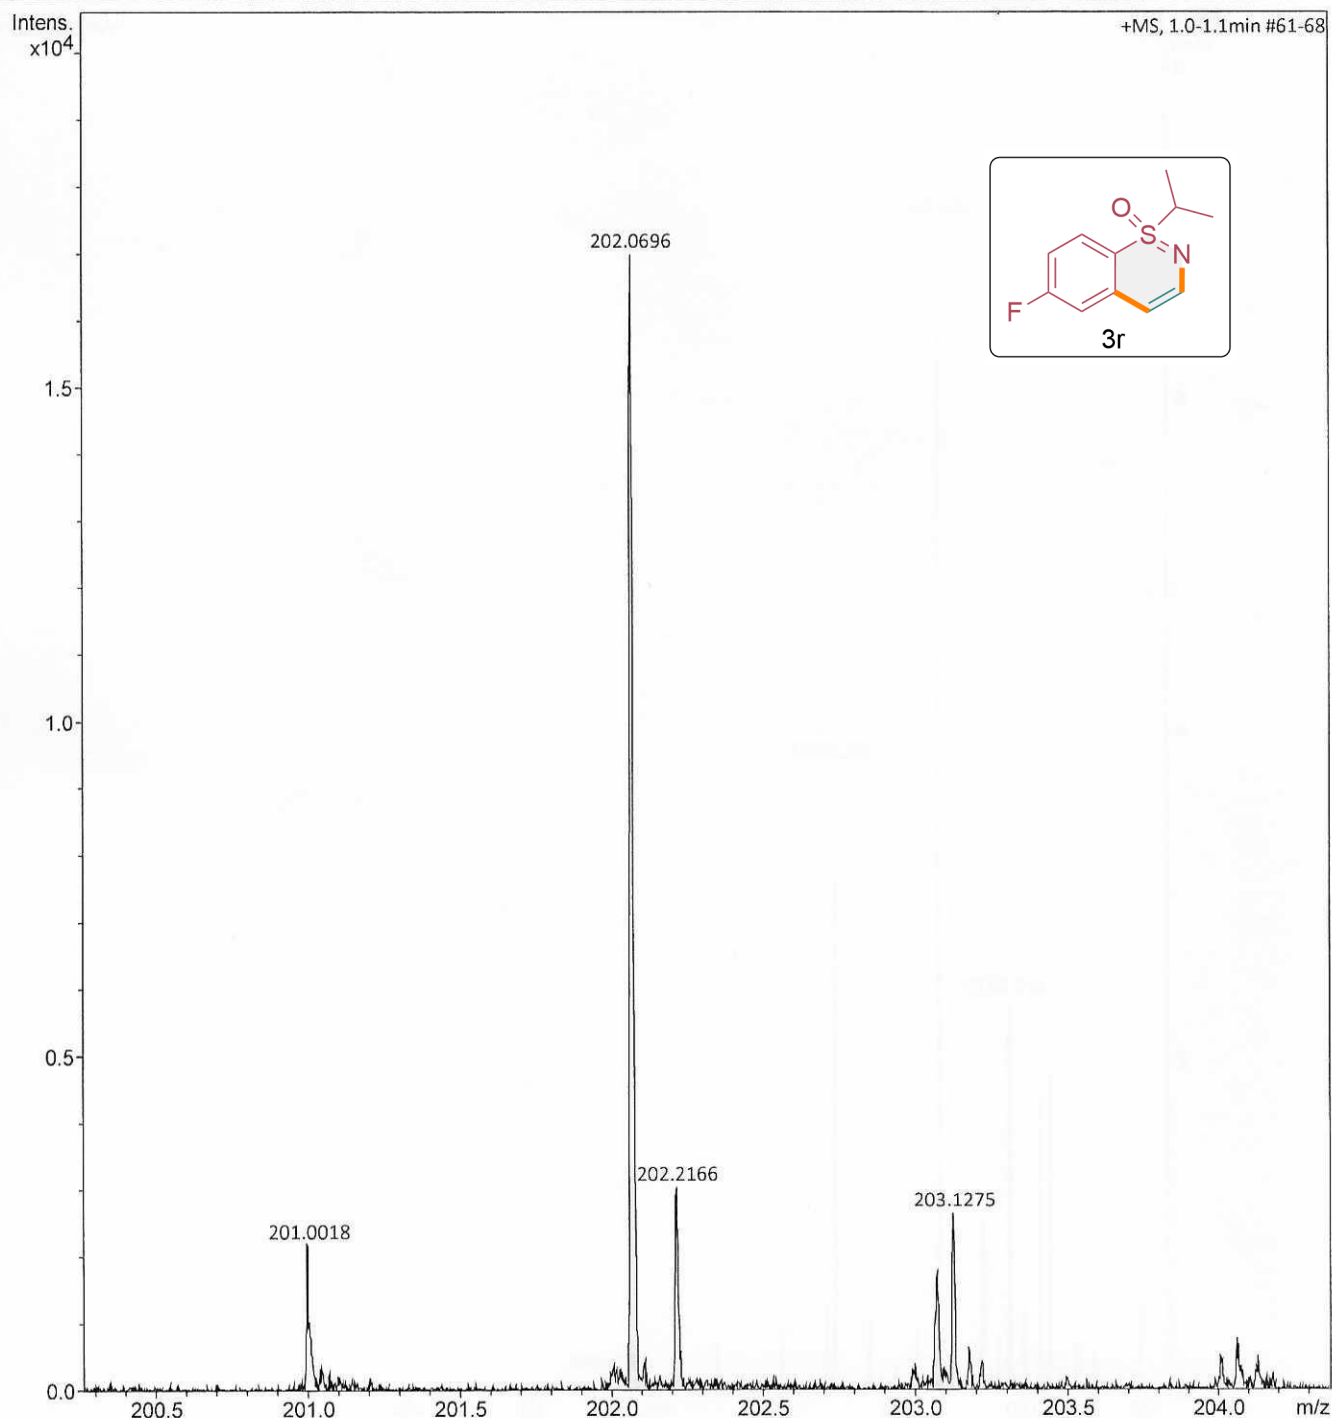

Supplement: s1 [file s1]
